# Supplementary material for: Rate of molecular evolution and pleiotropy on the evolutionary trajectories of penguin genes
Source: Research Square preprint supplement (doi:10.21203/rs.3.rs-6933349/v1), 2025-07-30
Supplement: Supplementary file 1 [file 5e038e68d5c66d2170c78a34.xlsx]

## Sheet: Pleiotropy
Contig	Terms	Pleiotropy
Contig013333	['GO:0010564', '', 'GO:0007059', 'GO:0050790', 'GO:0043086', 'GO:0051726']	2
Contig006676	[]	0
Contig012506	['GO:0007286', 'GO:0031639', 'GO:0042744', 'GO:0022414', 'GO:0001558', 'GO:0009566', 'GO:0006355', 'GO:0061024', 'GO:0008152', 'GO:0042403', 'GO:0006536', 'GO:0010952', 'GO:0045926', 'GO:0006694', 'GO:0016126', 'GO:0030539', 'GO:2000278', 'GO:1901605', 'GO:0098869', 'GO:1901615', 'GO:0007265', '', 'GO:0042446', '', 'GO:0008203', 'GO:0043065', 'GO:0009987', 'GO:0009826', 'GO:0035162', 'GO:0050878'…	27
Contig012882	['GO:0008333', 'GO:0007040', 'GO:0016192', 'GO:0008104', 'GO:0046907', 'GO:0007032', 'GO:1905719']	4
Contig013591	['GO:0072678', 'GO:0042127', 'GO:0035677', 'GO:0030036', 'GO:0050911', 'GO:0003376', 'GO:1904706', 'GO:0046850', 'GO:0003143', 'GO:0061384', 'GO:0045944', 'GO:0060973', 'GO:0050927', 'GO:0007186', 'GO:0043547', 'GO:0048738', 'GO:0045595', 'GO:0006935', 'GO:0030595', 'GO:0007200', 'GO:0050900', 'GO:0007517', 'GO:0019222', 'GO:0048840', 'GO:0009888', 'GO:0060026', 'GO:0007492', 'GO:0046847', 'GO:00…	21
Contig003556	['GO:0001934', 'GO:0051965']	1
Contig006339	['GO:0006886', 'GO:0016192', '', 'GO:0046907', 'GO:0008104']	3
Contig001586	[]	0
Contig009506	['GO:0035946', 'GO:0010629', 'GO:0008152', 'GO:0001558', 'GO:0006259', 'GO:0032392', 'GO:0006402', 'GO:0071025', 'GO:0007005', 'GO:0006310', 'GO:0032508', 'GO:0007005', 'GO:0006139', 'GO:0051252', 'GO:0019222', 'GO:0097222', 'GO:0006396', 'GO:0016070', 'GO:0044528', 'GO:0090646', 'GO:0043066', 'GO:0070131', 'GO:0040008', 'GO:0000963', 'GO:2000827', 'GO:0051276', 'GO:0035945', 'GO:0006401', '', 'G…	18
Contig001387	['GO:1990845', 'GO:0006629', 'GO:0006631', 'GO:0008152']	3
Contig005242	['GO:0061668', 'GO:0070131', 'GO:0045892', 'GO:0006355', 'GO:1903108', 'GO:0070925', 'GO:1902775', 'GO:0042254', 'GO:0010468']	4
Contig010562	['GO:0050896', 'GO:0050911', 'GO:0007186', 'GO:0007608']	4
Contig001855	['GO:0009887', 'GO:0008015', 'GO:0042127', 'GO:0060271', 'GO:0006355', 'GO:0045944', 'GO:0098534', 'GO:0009888', 'GO:0006357', 'GO:0000278', 'GO:0030030', 'GO:0051726', 'GO:0006884', '', 'GO:0008361', 'GO:0044458', 'GO:0007049', 'GO:0002064', 'GO:1903251', 'GO:0030855']	12
Contig010110	['GO:0042340', 'GO:0008152', 'GO:0006027', 'GO:0035821', 'GO:0018958', 'GO:0030203', 'GO:1901615']	3
Contig015803	['GO:0006974', 'GO:0006281', 'GO:0036297']	3
Contig008313	['GO:0008203', 'GO:0006629', 'GO:0022904', 'GO:1904322', 'GO:0140647', 'GO:0006694', 'GO:0071320', 'GO:0051353', 'GO:0022900', 'GO:0042445', 'GO:0008202', 'GO:1901615', 'GO:0042446']	8
Contig005894	['GO:0046513', 'GO:0010706', 'GO:0070085', 'GO:0042551', 'GO:0006688', 'GO:0005975', 'GO:0007417', 'GO:0048812', 'GO:0006687', 'GO:0021955', 'GO:0030182', 'GO:0006486', 'GO:0001573', 'GO:0001572', 'GO:0006665', 'GO:0022010', 'GO:0022008', 'GO:0048469', 'GO:0006629', 'GO:0030148', 'GO:0048666']	8
Contig006258	['GO:0048015', 'GO:0043491', 'GO:0016310', 'GO:0036092', 'GO:0006629', 'GO:0046854', 'GO:0016477', 'GO:0035556']	7
Contig004819	['GO:0030036', 'GO:0061337', 'GO:0070633', 'GO:0060054', 'GO:0022414', 'GO:0007157', 'GO:0098901', 'GO:0007005', 'GO:0060038', 'GO:0048738', 'GO:0055001', 'GO:0034109', 'GO:0030593', 'GO:0009888', 'GO:0086072', 'GO:0086067', 'GO:0055013', 'GO:0010669', 'GO:0060044', 'GO:0001775', 'GO:0046629', 'GO:0045216', 'GO:0098609', 'GO:0007507', 'GO:0098904', 'GO:0098742', 'GO:0060326', 'GO:0008354', 'GO:00…	11
Contig011249	['GO:0006265', 'GO:0022414', 'GO:0006259', 'GO:0000819', 'GO:0045944', 'GO:0045870', 'GO:0006974', 'GO:0030263', 'GO:0040016', 'GO:0043065', 'GO:0048511', 'GO:0000712', 'GO:0030261', 'GO:1905463', 'GO:0051309', 'GO:0006266', 'GO:0007059', 'GO:0002244', 'GO:0007143', 'GO:0042752']	10
Contig004540	['GO:0070562', 'GO:0006915', 'GO:0045944', 'GO:0000122', 'GO:0045595', 'GO:0008380', 'GO:0070564', 'GO:0006974', 'GO:0050769', 'GO:0009888', 'GO:0006357', 'GO:0006397', 'GO:0030511', 'GO:0033993', 'GO:0048513', 'GO:0048385', 'GO:0010467', 'GO:0071300', 'GO:0009792', 'GO:0045892', 'GO:0042771', 'GO:0043923', '', 'GO:0048026', 'GO:0000398', 'GO:0035914', 'GO:0010628', 'GO:0014010', 'GO:0022008', 'G…	17
Contig013009	['GO:0080090', '', 'GO:0006468', 'GO:0043254', 'GO:1903298', 'GO:0042981', 'GO:0010507', 'GO:0046329', 'GO:0051345', 'GO:0050896', 'GO:0051649', 'GO:0043066', '', 'GO:0019222', 'GO:2001171', 'GO:1903852', 'GO:1902176', 'GO:1903214', 'GO:0033605', 'GO:0051402', 'GO:0033138', 'GO:0071542', 'GO:0030097', 'GO:0002931', 'GO:0018105', 'GO:1904544', '', '', 'GO:0031999', 'GO:2000377', 'GO:1903955', 'GO:…	28
Contig005618	['GO:0008295', 'GO:0006596', 'GO:0001701', 'GO:0006595', 'GO:0006597', 'GO:0046500']	2
Contig002431	['GO:0043171', 'GO:0015074', 'GO:0006508', 'GO:0006313', 'GO:0006518', 'GO:0035556']	5
Contig015163	['GO:0016070', 'GO:0010629', 'GO:0010587', 'GO:0008152', 'GO:0006308', '', 'GO:0090669', 'GO:0051321', 'GO:0071051', 'GO:0090304', 'GO:0000495', 'GO:0032212', '', 'GO:0006402', 'GO:1904872', 'GO:0000289']	8
Contig011408	[]	0
Contig009053	['GO:0060271', 'GO:0042953', 'GO:0015031', 'GO:0008104', 'GO:0030030', 'GO:0046359', 'GO:0070121', 'GO:0007399', 'GO:0033539']	4
Contig011220	['GO:0010629', 'GO:0032543', 'GO:0016310', 'GO:0006412', 'GO:0017148', 'GO:0010467']	4
Contig000182	['GO:0008285', 'GO:0010977', 'GO:0001558', 'GO:0031397', 'GO:0016525', 'GO:0030308', 'GO:0001525', 'GO:0032007']	5
Contig009736	['GO:0043170', 'GO:0051028', 'GO:0006406', 'GO:0008152', 'GO:0006355', 'GO:0015031', 'GO:0051292', 'GO:0006468', 'GO:0006913', 'GO:0006139', 'GO:0006606', 'GO:0008585', 'GO:0043170', 'GO:0008104', 'GO:0043408', 'GO:0046660', 'GO:0065003', 'GO:0008406', 'GO:0000973', 'GO:0010468', 'GO:0000972', 'GO:0046907', 'GO:0072006', 'GO:0010467', 'GO:0035556']	16
Contig009677	['GO:0009060', 'GO:0042776', 'GO:0022904', 'GO:0065003', 'GO:0007005', 'GO:0006979', 'GO:0007585', 'GO:0042775', 'GO:0032981']	6
Contig007468	['GO:0098609', 'GO:0000902', 'GO:0007156', 'GO:0060122', 'GO:0007043', 'GO:0098742', 'GO:0007626', 'GO:0034332', 'GO:0016339', 'GO:0007605', 'GO:0007155']	6
Contig009606	['GO:0033233', 'GO:0071407', 'GO:0008593', 'GO:0045580', 'GO:0021885', 'GO:0045944', 'GO:0045595', 'GO:0090398', 'GO:0001764', 'GO:0048545', 'GO:0022407', 'GO:0021884', 'GO:0019222', 'GO:0030900', 'GO:0006357', 'GO:0045893', 'GO:0008347', 'GO:0030182', '', 'GO:0003007', 'GO:0043401', 'GO:0048844', 'GO:0007296', 'GO:0001701', 'GO:0045747', 'GO:0021537', 'GO:0048589', 'GO:0030521', 'GO:0045582', 'G…	14
Contig006573	['GO:0010814', 'GO:0008015', 'GO:0050435', 'GO:0045907', 'GO:0060319', 'GO:0048286', 'GO:0043065', 'GO:0002474', 'GO:0001666', 'GO:0042310', 'GO:0071333', 'GO:0010817', 'GO:0048513', 'GO:0030154', 'GO:0032092', 'GO:0009410', 'GO:0042447', 'GO:0048856', 'GO:1903597', 'GO:0034616', 'GO:0046325', 'GO:0007565', 'GO:0019233', 'GO:0097066', 'GO:0043171', 'GO:0060047', 'GO:0006518', 'GO:0050729', 'GO:00…	36
Contig006498	['GO:0002250', 'GO:0002376', 'GO:0050850', 'GO:0007169', 'GO:0001920', 'GO:0051051', 'GO:0050862', 'GO:0006968']	3
Contig012765	['GO:0043170', 'GO:0006479', 'GO:0018364', 'GO:0008152', 'GO:0019538', '', 'GO:0044238', 'GO:0032259', 'GO:0043414']	4
Contig000725	['GO:0048468', 'GO:0007601', 'GO:0043403', 'GO:0050896', 'GO:0050908', 'GO:0048856', 'GO:0006164', 'GO:0048513', 'GO:0048731']	6
Contig004945	['GO:0007143', 'GO:0006366', 'GO:0007292', 'GO:0000280', 'GO:0022414', 'GO:0006281', 'GO:0007144', 'GO:0007283', 'GO:0051321', 'GO:1990918', 'GO:0007141']	6
Contig000873	['GO:1902018']	0
Contig001659	['GO:0007264', 'GO:0050790', 'GO:0043547', 'GO:0035556', 'GO:0007265']	2
Contig010659	['GO:1902437', 'GO:0048468', '', 'GO:0006476', 'GO:0042127', 'GO:0051153', 'GO:0006355', 'GO:0070555', 'GO:0001503', 'GO:0072114', 'GO:0033235', 'GO:0045944', 'GO:0036073', 'GO:0000122', 'GO:0010882', 'GO:0034983', 'GO:0043433', 'GO:0040029', 'GO:0045595', 'GO:0014894', 'GO:0071356', 'GO:0006325', 'GO:0050896', 'GO:0090299', 'GO:0019222', 'GO:0001501', 'GO:0048701', 'GO:0048742', 'GO:0014898', ''…	25
Contig008058	['GO:0034765', 'GO:0051259', 'GO:0046928', 'GO:1904057', 'GO:0060078', 'GO:1904456', 'GO:0006811', 'GO:0007268', 'GO:0006813', 'GO:0071805', 'GO:0055085', 'GO:0051260', 'GO:0099505']	9
Contig000832	['GO:0070262', 'GO:0010795', 'GO:0006470', 'GO:0009889']	1
Contig006071	['GO:0009887', 'GO:0046599', 'GO:0016197', 'GO:0046323', 'GO:0051179', 'GO:1990798', 'GO:0051492', 'GO:0033043', 'GO:0044342']	3
Contig009808	['GO:0042327', 'GO:0006457', 'GO:0048144', 'GO:0050821', 'GO:0006693', 'GO:0006631', 'GO:0006633', 'GO:0051131', '', '', 'GO:0042921', 'GO:0043588', 'GO:2000573', 'GO:0065003', 'GO:0007004', 'GO:0019233', 'GO:0051085', '', 'GO:0001516', 'GO:1905323', 'GO:0010628', 'GO:0006629', 'GO:0060430', 'GO:0005978']	12
Contig013209	['GO:0002674', 'GO:0007249', 'GO:0061038', 'GO:0006366', 'GO:0006355', 'GO:0045944', 'GO:0046697', 'GO:1903699', 'GO:0006325', 'GO:0001501', 'GO:0000165', '', 'GO:0043124', 'GO:0050728', 'GO:0043409', 'GO:0048733', 'GO:0030317', '', '', 'GO:0009791', 'GO:0007338', 'GO:0006954', 'GO:1903709', '', '', 'GO:0010468', 'GO:0032259']	9
Contig003414	['GO:0006915', 'GO:0043066', 'GO:0032088']	2
Contig007385	['GO:0009887', 'GO:0010839', 'GO:0060271', 'GO:0060831', 'GO:0043616', 'GO:0006259', 'GO:0032501', 'GO:0021914', 'GO:0060971', 'GO:0001843', 'GO:0072657', 'GO:0016331', 'GO:0035735', 'GO:0006284', 'GO:0035720', 'GO:0010172', 'GO:0060562', 'GO:0061066', 'GO:0006935', 'GO:0007224', 'GO:0045879', 'GO:0009966', 'GO:0048598', 'GO:0060429', 'GO:0009987', 'GO:0090263', 'GO:0050896', 'GO:0001838', 'GO:00…	24
Contig013719	['GO:0006974', 'GO:0060271', 'GO:0007224', 'GO:0030030', 'GO:0008360', 'GO:0000398', 'GO:0010467', 'GO:0008380', 'GO:0007010']	9
Contig002299	['GO:0090063', 'GO:0043170', 'GO:0045807', 'GO:0030951', 'GO:0046785', 'GO:0051298', 'GO:0032289', 'GO:0051301', 'GO:0009059', 'GO:0007052', 'GO:0060291', 'GO:0008542', 'GO:0000278', 'GO:0007051', 'GO:0002181', 'GO:0000226', 'GO:0009058', 'GO:0046959', 'GO:0097435', 'GO:0007019', 'GO:0051128', 'GO:0031109', 'GO:0007049', 'GO:0065003', 'GO:0097062', 'GO:0016043', 'GO:0008152', 'GO:0010609', 'GO:00…	13
Contig011865	['GO:0044782', 'GO:0030030', 'GO:0060322']	2
Contig001653	[]	0
Contig009610	['GO:0034727', 'GO:0000045', 'GO:0006325', 'GO:0034497', 'GO:0015031', 'GO:0006412', 'GO:0006415', 'GO:0000423', '', 'GO:0006914', 'GO:0045324', 'GO:0032259', 'GO:0051726', 'GO:0006935']	11
Contig005049	['GO:0007601', 'GO:0019722', 'GO:0007166', '', 'GO:0032400', 'GO:0050848', 'GO:0007186', 'GO:0048015', 'GO:0032402', 'GO:0009987', 'GO:0032401', 'GO:0032438', 'GO:0006726', 'GO:1903056', 'GO:1902908', 'GO:0007218', 'GO:0051179', 'GO:0035556']	8
Contig005745	['GO:0001503', 'GO:0051384', 'GO:0050766', 'GO:0070849', 'GO:0071732', 'GO:0002682', 'GO:0001666', 'GO:0007623', 'GO:0055093', 'GO:0032496', 'GO:0009725', 'GO:0032526', 'GO:0070741', 'GO:0071260', 'GO:0006869', 'GO:0002376', 'GO:0008228', 'GO:0035821', 'GO:0045087', 'GO:0033189', 'GO:0007585', 'GO:0001867']	8
Contig012988	['GO:0019470', 'GO:0006560', 'GO:0006536', 'GO:0006562', 'GO:0010133', 'GO:0022900', 'GO:0007186']	5
Contig013490	['GO:0031122', 'GO:0006886', 'GO:0031113', 'GO:0031334', 'GO:0051301', 'GO:0000226', 'GO:0051988', 'GO:0051726', 'GO:0051493']	6
Contig005701	['GO:0036211', 'GO:0002319', 'GO:1990743', 'GO:0097503', 'GO:0006629', 'GO:0006468', 'GO:0010706', 'GO:0006487', 'GO:0006486', 'GO:1905403', 'GO:0006054']	5
Contig005824	['GO:0030902', 'GO:0060271', 'GO:0015031', 'GO:0007163', 'GO:1905349', 'GO:0097711', 'GO:0070201', 'GO:0090316', 'GO:0030030', 'GO:1905515', 'GO:0030916', 'GO:0000226', 'GO:0045893', 'GO:0007368', 'GO:0007507', 'GO:0060041', 'GO:0001654', 'GO:0045494', 'GO:0043010', 'GO:0001822', 'GO:0042462', 'GO:0048793']	11
Contig005366	['GO:0007411', 'GO:0015693', 'GO:0006811', 'GO:1903830']	4
Contig013033	['GO:0006915', 'GO:0150098', 'GO:0007166', 'GO:0002718', 'GO:0031641', 'GO:0045595', 'GO:0012501', 'GO:0006974', 'GO:0050779', 'GO:0071356', 'GO:0006955', 'GO:0048714', 'GO:0034097', '', 'GO:0032496', 'GO:0051044', 'GO:0003176', 'GO:0002724', 'GO:0050728', 'GO:0150079', 'GO:0042129', 'GO:0003170', '', 'GO:0033209', 'GO:0045732', 'GO:0031643', 'GO:0008630', 'GO:0097191', '', 'GO:2001141', 'GO:0071…	15
Contig014306	[]	0
Contig005217	['GO:0006629', 'GO:0050765', 'GO:0046856']	2
Contig010571	['GO:0015811', 'GO:1902475', 'GO:0015810', 'GO:0015807', 'GO:0003333', 'GO:0055085', 'GO:0006865', 'GO:0015813']	4
Contig007259	['GO:0006355', 'GO:0000122', 'GO:0010468']	3
Contig003429	['GO:0006366', 'GO:0006355', 'GO:0006357', 'GO:0140467', 'GO:0000122']	4
Contig013998	['GO:0006812', 'GO:1902475', 'GO:0042941', 'GO:0015807', 'GO:0042942', 'GO:0055085', 'GO:0015825', 'GO:0015804', 'GO:0015711', 'GO:0006865']	4
Contig011790	['GO:0010629', 'GO:0071359', 'GO:0071407', 'GO:0045070', 'GO:0009987', 'GO:0034097', 'GO:0006397', '', 'GO:0044528', 'GO:0035457', '', 'GO:0002082', 'GO:0000289', 'GO:0090304', 'GO:0045087', 'GO:0000958', 'GO:0090324', 'GO:0000288', 'GO:0071346', 'GO:0010468', 'GO:0006402', 'GO:1901698']	9
Contig012872	['', 'GO:0006364', 'GO:0060255', 'GO:0031047', 'GO:0000466', 'GO:0090304', 'GO:0031123', 'GO:0010467', 'GO:0031125', 'GO:0000467']	6
Contig010217	['GO:0006812', 'GO:0098655', 'GO:0006874', 'GO:0034220', 'GO:0055085']	5
Contig011539	['GO:0044255', 'GO:0006629', 'GO:0046470', 'GO:0034638', 'GO:0016042']	4
Contig003271	['GO:0001963', 'GO:0002866', 'GO:0042177', '', 'GO:0051899', 'GO:0042981', 'GO:0051353', 'GO:0045944', 'GO:1903181', 'GO:0098869', 'GO:0046826', 'GO:0050727', 'GO:2000679', 'GO:0036527', 'GO:0036530', 'GO:0043066', '', '', 'GO:0106044', 'GO:2000157', 'GO:1903168', 'GO:0033138', 'GO:0050787', 'GO:0007338', 'GO:1903178', 'GO:0010628', 'GO:0006954', 'GO:0006790', 'GO:0036529', 'GO:0042593', 'GO:0010…	23
Contig011436	['GO:0070370', 'GO:0009408', 'GO:0048646', 'GO:0045892', 'GO:0048856', 'GO:0007417', 'GO:0009888', 'GO:0035987', 'GO:0006936', 'GO:0019896', 'GO:0034605', 'GO:0014029', 'GO:0007275', 'GO:0009653', 'GO:0000122', 'GO:0030154']	8
Contig012743	[]	0
Contig013775	['GO:0034765', 'GO:0044829', 'GO:0019222', '', 'GO:0048524', 'GO:0090314']	3
Contig008040	['GO:0006508', 'GO:0035610']	1
Contig000634	['GO:0008016', 'GO:0007029', 'GO:0061817', 'GO:0036498', 'GO:0045070', 'GO:0090114', 'GO:0044790', 'GO:0044829', 'GO:0006888', 'GO:0051641', 'GO:0044830', 'GO:0019076', 'GO:0044828', 'GO:0036269', 'GO:0046725', 'GO:0006874', 'GO:0090158', 'GO:0046907', 'GO:0030968', 'GO:0006986']	10
Contig003991	['GO:0006886', 'GO:0072659', 'GO:0006887', 'GO:0070257']	4
Contig013202	['GO:0007613', 'GO:0006887', 'GO:0016192', 'GO:0016485', 'GO:0048812', 'GO:0006508', 'GO:0006897', 'GO:0035821', 'GO:0031638', 'GO:0010467']	8
Contig001536	['GO:0001942', 'GO:0042475', 'GO:1901224', 'GO:0061153', 'GO:0006096', 'GO:0030154']	2
Contig008848	['GO:0030953', 'GO:0022414', 'GO:0090307', 'GO:0051301', 'GO:0051321', 'GO:0001764', 'GO:0031122', 'GO:0007020', 'GO:1990734', 'GO:0000278', 'GO:0000226', 'GO:0098863', 'GO:0007420', 'GO:0030154', 'GO:0097435', 'GO:0051726', 'GO:0071963', 'GO:0006508', 'GO:0007049', 'GO:0031109', 'GO:0065003', 'GO:0010968', 'GO:0051225', 'GO:0007283', 'GO:0000917', 'GO:0007229', 'GO:0022008', 'GO:0051179', 'GO:00…	16
Contig004481	['', 'GO:0044237', 'GO:0006744']	1
Contig010539	['GO:0050896', 'GO:0050911', 'GO:0007186', 'GO:0007608']	4
Contig008716	['GO:0032456', 'GO:0016197', 'GO:0016192', 'GO:0030050', 'GO:0098856', 'GO:0008361', 'GO:0048546', 'GO:0015031', 'GO:0043588', 'GO:0061564', 'GO:0003245', 'GO:0007015', 'GO:0048731', 'GO:0099518', 'GO:0003242', 'GO:0030036']	8
Contig009751	['GO:0032760', 'GO:1903487', 'GO:0060337', 'GO:0060339', 'GO:0060700', 'GO:0006139', 'GO:0039529', 'GO:0071639', 'GO:0034097', 'GO:0039530', 'GO:0071650', 'GO:0070106', 'GO:2000342', 'GO:0002376', 'GO:0045071', 'GO:0032728', 'GO:0009617', 'GO:1900246', 'GO:0006164', 'GO:0071659', 'GO:0009615', 'GO:0045087', 'GO:0006401', 'GO:0042742', 'GO:0051607', 'GO:0035395']	6
Contig009581	[]	0
Contig014074	['GO:0006915', 'GO:0010629', 'GO:0050966', 'GO:0010719', 'GO:2000391', 'GO:0042981', 'GO:0060450', 'GO:0045760', 'GO:0000122', 'GO:0097202', 'GO:0043065', 'GO:0050860', 'GO:0098703', 'GO:0042986', 'GO:1904457', 'GO:0090281', 'GO:1901082', 'GO:0048147', 'GO:0043525', 'GO:0050965', 'GO:2000774', 'GO:1903238', 'GO:0097190', 'GO:0042130', 'GO:0010628', 'GO:0030889', 'GO:1901300', 'GO:0051017', '']	9
Contig009695	['GO:0032465', 'GO:0071539', 'GO:0032467', 'GO:0051301', 'GO:0051493', 'GO:0007020', 'GO:0045787', 'GO:0000278', 'GO:0070201', 'GO:0051781', 'GO:0097435', 'GO:0051726', 'GO:0007019', 'GO:0031109', 'GO:0007049', 'GO:0060236', 'GO:0065003', 'GO:0010968', 'GO:0022607', 'GO:0070507', 'GO:0051179']	13
Contig015878	['GO:0015914', 'GO:0010831', 'GO:0006869', 'GO:0001701', 'GO:0045332', 'GO:0097035', 'GO:0051155', 'GO:0140331']	2
Contig015975	[]	0
Contig012156	['GO:0022414', 'GO:0008152', 'GO:0032508', 'GO:0007131', 'GO:0051321', 'GO:0000280', 'GO:1904354', 'GO:0006974', 'GO:0031860', 'GO:0019222', 'GO:0070192', 'GO:0110025', 'GO:0050790', 'GO:0033674', 'GO:0044818', 'GO:0000722', 'GO:0000723', 'GO:0007127', 'GO:0006281', 'GO:0035825', 'GO:0007049', 'GO:0007004', 'GO:0006302', 'GO:0006996', 'GO:0090304', 'GO:0000729', 'GO:0032206', 'GO:0051179', 'GO:00…	17
Contig001323	['GO:0030576']	1
Contig013365	['GO:0015031', 'GO:0030512', 'GO:0032801', '']	2
Contig004648	['GO:0008285', 'GO:0006974', 'GO:0006915', 'GO:0042127', 'GO:0016485', 'GO:0006511', 'GO:0042771', 'GO:0043161', 'GO:0006508', 'GO:0050790', 'GO:0006977', 'GO:0006470', 'GO:0035556']	9
Contig011832	['GO:0008033', 'GO:0048468', 'GO:0031397', 'GO:0050821', 'GO:0007275', 'GO:0001764', 'GO:0061053', 'GO:0019222', 'GO:0007417', 'GO:0009888', 'GO:0006357', 'GO:0050790', 'GO:0002926', 'GO:0009653', 'GO:0048513', 'GO:0030154', 'GO:0007409', 'GO:0002098', 'GO:0022008', 'GO:0001755', 'GO:0006417', 'GO:0016477', 'GO:0030335', 'GO:0007399', 'GO:0010467']	14
Contig009496	['GO:0031570', 'GO:0008152', 'GO:0006259', 'GO:0006260', 'GO:0055085', 'GO:0032508', 'GO:0006284', 'GO:0030071', 'GO:0033260', 'GO:0022616', 'GO:0090656', 'GO:0006139', 'GO:0006974', '', 'GO:0006264', 'GO:0031860', 'GO:0000706', 'GO:0000278', 'GO:0044806', 'GO:0016070', 'GO:0043137', 'GO:0045740', 'GO:1903469', 'GO:0033567', 'GO:0071932', 'GO:0000723', 'GO:0006273', 'GO:0006281', 'GO:0045786', 'G…	24
Contig002121	['GO:0048846', 'GO:0030198', 'GO:0007412', 'GO:0048856', 'GO:0038063', 'GO:0071711', 'GO:0035821', 'GO:0007528', 'GO:0031290']	3
Contig013382	['GO:0050768', 'GO:0060271', 'GO:0071539', 'GO:0035735', 'GO:0001764', 'GO:0031122', 'GO:0042073', 'GO:0034454', 'GO:0097150', 'GO:0008104', 'GO:0090316', 'GO:0030030', 'GO:1905515', 'GO:0000226', 'GO:0033365', 'GO:0035176', 'GO:0034453', 'GO:0022027', 'GO:0007098']	11
Contig000619	['GO:0006366', 'GO:0050650', 'GO:0048839', 'GO:0051091', 'GO:0045944', 'GO:1990079', 'GO:0002062']	4
Contig014001	['GO:0006508', 'GO:1990798', 'GO:0030574', 'GO:0006520', 'GO:0031018']	2
Contig002636	['GO:0010629', 'GO:0014706', 'GO:0014866', 'GO:0071347', 'GO:2000288', 'GO:0042981', 'GO:2000279', 'GO:0071466', 'GO:0000122', 'GO:0007519', 'GO:0007517', 'GO:0071356', 'GO:0043065', 'GO:0045445', 'GO:0019222', 'GO:0009888', 'GO:0006357', 'GO:0071560', 'GO:0045214', 'GO:0070528', 'GO:0045893', 'GO:0009653', 'GO:0043066', 'GO:0051726', 'GO:0071260', 'GO:0045892', 'GO:0009791', 'GO:0035914', 'GO:00…	15
Contig004147	['GO:0030198', 'GO:0001822', 'GO:0035821', 'GO:0032836']	3
Contig002653	['GO:0001523', 'GO:0061720', 'GO:0030902', 'GO:0016567', 'GO:0006694', 'GO:0014032', 'GO:0048762', 'GO:0055085', 'GO:0033339', 'GO:0003002', 'GO:1901615', 'GO:0042446', 'GO:0042445', 'GO:0048387', 'GO:0016125', 'GO:0005975', 'GO:0055088', 'GO:0007417', 'GO:0006269', 'GO:0021661', 'GO:0003151', 'GO:0042276', 'GO:0055014', 'GO:0034653', 'GO:0009952', 'GO:0032218', 'GO:0048284', 'GO:0006511', 'GO:00…	15
Contig015677	['GO:0010811', 'GO:0030198', 'GO:0045669', 'GO:0060347', 'GO:0001763', 'GO:0045944', 'GO:0007160', 'GO:0003171', 'GO:0050878', 'GO:0071356', '', 'GO:0043410', 'GO:0034097', 'GO:0030511', 'GO:0001658', 'GO:0072078', 'GO:0033627', 'GO:0048513', 'GO:0097195', 'GO:0030154', 'GO:0051145', 'GO:0098609', 'GO:0006508', 'GO:0030155', 'GO:0045184', 'GO:0010694', 'GO:0070374', 'GO:0007179', 'GO:0045987', 'G…	11
Contig005433	['GO:0006974', 'GO:0006915', 'GO:0043065', 'GO:0042771', 'GO:0051898', 'GO:0009653', 'GO:0035556']	5
Contig001702	['GO:0009887', 'GO:0032760', 'GO:0080090', 'GO:0008152', 'GO:0010738', 'GO:0006468', 'GO:0051900', 'GO:0006897', 'GO:0040012', 'GO:1900244', 'GO:0021885', 'GO:0010507', 'GO:0045595', '', 'GO:0010506', 'GO:0043087', 'GO:1903217', 'GO:0030154', 'GO:0018107', 'GO:0032092', 'GO:0043066', 'GO:0019222', 'GO:0060161', 'GO:0021756', 'GO:0017157', 'GO:0051966', 'GO:1902499', 'GO:0018105', 'GO:2000177', 'G…	40
Contig007763	['GO:0061002', 'GO:0090630', 'GO:0043087', 'GO:0048013', 'GO:0050790', 'GO:0007399', 'GO:0043547', 'GO:0030154']	4
Contig013743	['GO:0042126', 'GO:0006570']	1
Contig015894	['GO:0006813', 'GO:1902600', 'GO:0010155', 'GO:0050801', '', 'GO:0071805', 'GO:0032496', 'GO:0035725', 'GO:0006883', 'GO:0006486', 'GO:1990573', 'GO:0045851', 'GO:0006811', 'GO:0019725', 'GO:0036376', 'GO:0006814', 'GO:0006885', 'GO:0030007', 'GO:0007155']	9
Contig014371	['GO:0032956', 'GO:0006468', 'GO:0071846', 'GO:0034316', 'GO:0050790', 'GO:0007399', 'GO:0007612', 'GO:0007626', 'GO:0043086', 'GO:0051493']	3
Contig001526	['GO:0006366', 'GO:0080090', 'GO:0006355', '', '', 'GO:0045944', 'GO:0000122', 'GO:0006325', 'GO:0006357', 'GO:0045893', 'GO:1902459', 'GO:1902455', 'GO:0019222', 'GO:0071514', 'GO:0097368', 'GO:0007283', 'GO:0030336', 'GO:0030512', 'GO:0010468']	12
Contig013664	['GO:0010629', 'GO:0060612', 'GO:0043488', 'GO:2000637', 'GO:0007005', 'GO:0034063', 'GO:0060964', 'GO:0001501', 'GO:0022904', 'GO:0010467', 'GO:1900246', 'GO:0051276', 'GO:0010608', 'GO:0051983', 'GO:0001942', 'GO:0039535', 'GO:0006417', 'GO:0035196', 'GO:0010468']	6
Contig013754	['GO:0006508', 'GO:0010498', 'GO:0043161', 'GO:0051603']	4
Contig007598	['GO:0042127', 'GO:0032918', 'GO:0046208', 'GO:0006596', 'GO:0006598', 'GO:0042402', 'GO:0006473', 'GO:0006595', 'GO:0032919', 'GO:0009447', 'GO:0001525']	4
Contig004519	['GO:0042127', 'GO:0016525', 'GO:0010596', 'GO:0009611', 'GO:0001937', 'GO:0043537', 'GO:1901490', 'GO:0045765', 'GO:0010594', 'GO:2000772', 'GO:0051726', 'GO:0060674', 'GO:1901491', 'GO:0006508', 'GO:0007049', 'GO:0060716', 'GO:0001525', 'GO:0008285', 'GO:0010628', 'GO:0030336', 'GO:0050680']	10
Contig007422	['GO:1902414', 'GO:0006970', 'GO:0045216', 'GO:0050680', 'GO:0010633', 'GO:0070830', 'GO:0046329']	3
Contig015663	['GO:0006623', 'GO:0036211', 'GO:0034727', 'GO:0044248', 'GO:1901136', 'GO:0030163', 'GO:0005975', 'GO:0051179', 'GO:0000272', 'GO:0006516', 'GO:0072330', 'GO:0008152', 'GO:0017000', 'GO:0046355', 'GO:0009313', 'GO:0009100']	6
Contig004052	['GO:0048137', 'GO:0006974', 'GO:0006281', 'GO:0021537', 'GO:0048193', 'GO:0007112', 'GO:0009987', 'GO:0007111', 'GO:0051092', 'GO:0099022', 'GO:0006901', 'GO:0007420', 'GO:0000916', 'GO:0000002', 'GO:0007110', 'GO:0006310', 'GO:0006891', 'GO:0007399', 'GO:0032508', 'GO:0030900', 'GO:0043087', 'GO:0030182', 'GO:0021987', 'GO:0000212', 'GO:0000723', 'GO:0030154', 'GO:0006888']	11
Contig012472	['GO:0006869', 'GO:0006890', 'GO:0006997', 'GO:0015914', 'GO:0120009', 'GO:0001701', 'GO:0006629']	5
Contig009713	['GO:0043627', 'GO:0006587', 'GO:0008152', 'GO:0051384', 'GO:0051592', 'GO:1902036', 'GO:0071285', 'GO:0006558', 'GO:0042427', 'GO:0007623', 'GO:0006559', '', 'GO:1901615', 'GO:0009072', 'GO:0031667', 'GO:0014823', 'GO:0006520']	6
Contig007802	['GO:0045944', 'GO:0000226', 'GO:0036010', 'GO:0045785', 'GO:1902001', 'GO:0042147', 'GO:0008104', 'GO:0006936', 'GO:0033365', 'GO:0051128', 'GO:0006635', 'GO:0009062', 'GO:0015908', 'GO:0006351', 'GO:0006355', 'GO:0140591', 'GO:0090307', 'GO:0051641', 'GO:0042760', 'GO:0000038', 'GO:0006357', 'GO:0015031', 'GO:0034315', 'GO:0051225', 'GO:0045214', 'GO:0015910', 'GO:0016197', 'GO:0043574', 'GO:00…	20
Contig007995	['GO:0032147', 'GO:0007175', 'GO:0007186', 'GO:0043549', 'GO:0001934', 'GO:0007601']	3
Contig004558	['GO:0072488', 'GO:0050919', 'GO:0061343', 'GO:0008543', 'GO:2001222', 'GO:0007155', 'GO:0007411', 'GO:0051965', 'GO:0071711', 'GO:0003007']	6
Contig006807	['GO:0000165', 'GO:0006468', 'GO:0008283', 'GO:0035556', 'GO:0071260', 'GO:0016310', 'GO:0045893']	5
Contig001694	['GO:0006977', 'GO:0007017']	1
Contig009721	['GO:0036211', 'GO:0006796', 'GO:0016311', 'GO:0006469', 'GO:0001933', 'GO:0001568', 'GO:0006470', 'GO:0043549', 'GO:0008347', 'GO:0035335', 'GO:1990264', 'GO:0001525']	6
Contig009030	['GO:0030036', 'GO:0030216', 'GO:0016477', 'GO:0060313', 'GO:0007160', 'GO:0043314', 'GO:0065002', 'GO:0035556', 'GO:0043547', 'GO:0016310', 'GO:0002692', 'GO:0043312', 'GO:0051649', 'GO:0003014', 'GO:0006909', 'GO:0043114', 'GO:0007044', 'GO:0050728', 'GO:0042472', 'GO:1905522', 'GO:0050885', 'GO:0032496', 'GO:1905517', 'GO:0060268', 'GO:0035023', 'GO:2000378', 'GO:0006468', 'GO:0007420', 'GO:00…	21
Contig010407	['GO:0006814', 'GO:1902476', 'GO:0051938', 'GO:0007268', 'GO:0006820', 'GO:0051649', 'GO:0098656', 'GO:1990384', 'GO:0071805', 'GO:0015711', 'GO:0050803', 'GO:0007601', 'GO:0015813', 'GO:0050896', 'GO:0006821', 'GO:0006817', 'GO:0055062', 'GO:0035725', 'GO:0006836', 'GO:0016192', 'GO:0035249', 'GO:0044341', 'GO:0006811', 'GO:0055085', 'GO:0006813', 'GO:0098700']	13
Contig008377	['GO:0008064', 'GO:0030036', 'GO:0000070', 'GO:0007283', 'GO:0048468', 'GO:0016358', 'GO:0007265', 'GO:0016310', 'GO:0035556', 'GO:0048513', 'GO:0061640', 'GO:0007112', 'GO:0032467', 'GO:0007091', 'GO:0007030', 'GO:0006996', 'GO:0001889', 'GO:0035331', 'GO:0000281', 'GO:0050909', 'GO:0051402', 'GO:0031032', 'GO:0006468', 'GO:0018107', 'GO:0032465', 'GO:1901888', 'GO:0000086', 'GO:0051301', 'GO:00…	22
Contig008648	['GO:0006974', 'GO:0006281', 'GO:0016567', 'GO:0010467', 'GO:0010212', '', 'GO:0006302', 'GO:0006370', 'GO:0070922', 'GO:0007049', 'GO:0032259', 'GO:0051301', 'GO:0045739', 'GO:0016556', 'GO:0090630', 'GO:0006397', 'GO:1904582', '', 'GO:0006370', 'GO:0006325']	13
Contig012232	['GO:0005975', 'GO:0043170', 'GO:0005975', 'GO:0044085', 'GO:0000271']	2
Contig013464	['GO:0045944', 'GO:0043066', 'GO:0120162', 'GO:0043433', 'GO:0007346', 'GO:0007623', 'GO:0010467', 'GO:0010468', 'GO:0045892', 'GO:0019222', 'GO:0044281', 'GO:0000122', 'GO:0001701', 'GO:0061436', 'GO:2000726', '', 'GO:0042262', 'GO:0042981', 'GO:0043697', 'GO:0006476', 'GO:0030307', '', 'GO:0044237', 'GO:0032720', 'GO:0001934', 'GO:0032008', 'GO:2000676', 'GO:0032501', 'GO:0032922', 'GO:1903575'…	20
Contig009823	['GO:0045785', 'GO:0007186', 'GO:0030041', 'GO:0030833', 'GO:1900026', 'GO:0035556', 'GO:0043547', 'GO:0002376', 'GO:0050773', 'GO:0030593', 'GO:0030217', 'GO:0016043', 'GO:0051056', 'GO:0006801', 'GO:0050790', 'GO:0030335', 'GO:0072593', 'GO:0042119', 'GO:0001775']	10
Contig000543	['GO:0007417']	0
Contig010499	['GO:0008380', 'GO:0000245', 'GO:0006397', 'GO:0010467', 'GO:0036261', 'GO:0000387', 'GO:0000398', 'GO:0006396', 'GO:1903241', 'GO:0065003', 'GO:0007507']	8
Contig000891	['GO:0098856', 'GO:0070508', 'GO:0015914', 'GO:0043534', 'GO:0033344', 'GO:0006702', 'GO:0046867', 'GO:0042060', 'GO:0010867', 'GO:0010899', 'GO:0015920', 'GO:0006910', 'GO:0043654', 'GO:0070328', 'GO:0030301', 'GO:0051000', 'GO:0031663', 'GO:0035461', 'GO:0044406', 'GO:0010886', 'GO:0034384', 'GO:0032497', 'GO:0006869', 'GO:0050764', 'GO:0034381', 'GO:0046718', 'GO:0042632', 'GO:0034383', 'GO:00…	10
Contig007886	['GO:0010594', 'GO:1900182', 'GO:0048584', 'GO:0042981', 'GO:0090051', 'GO:0007250', 'GO:0010468', 'GO:0032880', 'GO:0065003', 'GO:0030336', 'GO:0051092']	4
Contig008811	['GO:0006612', 'GO:0008104', 'GO:0006448', 'GO:0017148', 'GO:0010629', 'GO:0006614', 'GO:0045900']	5
Contig002611	['GO:0008104', 'GO:0035973', 'GO:0036037', 'GO:0019882', 'GO:0006914', 'GO:0007040', 'GO:0007033', 'GO:0098586']	4
Contig009829	['GO:0015012', 'GO:0006024']	1
Contig013931	['GO:0045944', 'GO:0006355', 'GO:0010467', 'GO:0010468', 'GO:0002218', 'GO:0000724', 'GO:0000380', 'GO:1902177', 'GO:0000122', 'GO:0048511']	9
Contig015100	['GO:0001649', 'GO:0030574', 'GO:0006897', 'GO:0006955', 'GO:0002376', 'GO:0016567', 'GO:0006355', 'GO:0006511', 'GO:0045087', 'GO:0006357', 'GO:0007166', 'GO:0000122']	12
Contig013738	['GO:0009101', 'GO:0051923', 'GO:0009247']	1
Contig004573	['GO:0000226', 'GO:1905913', 'GO:0140056', 'GO:0002834', 'GO:0007186', 'GO:0010801', 'GO:0051343', 'GO:0043388', '', 'GO:0010881', 'GO:0019222', 'GO:0016310', 'GO:0031023', 'GO:0035556', 'GO:0090151', 'GO:2000300', 'GO:0051641', 'GO:0002027', 'GO:1904094', 'GO:0055117', 'GO:0008104', 'GO:1901841', 'GO:0009593', 'GO:0051592', 'GO:0050848', 'GO:0007190', 'GO:0071805', 'GO:1990456', 'GO:0051480', 'G…	22
Contig007996	['GO:0008380', 'GO:0022618', 'GO:0010467', 'GO:0016477', 'GO:0006909', 'GO:0006996', 'GO:0006364', 'GO:0042254', 'GO:0000027', 'GO:1903862', 'GO:0008625', 'GO:0007169', 'GO:0097190', 'GO:0007166', 'GO:0051897', 'GO:0007399', 'GO:0070925', 'GO:0006397', 'GO:0042273', 'GO:0018108', 'GO:0033674', 'GO:0006915', 'GO:0006511', 'GO:0090070', 'GO:0065003', 'GO:2000767']	17
Contig003306	['GO:0045944', 'GO:0120162', 'GO:0070828', 'GO:0030853', 'GO:0048468', 'GO:0045892', 'GO:0000122', 'GO:0050872', 'GO:0050873', '', 'GO:0030154', '', 'GO:0045595', 'GO:0006351', 'GO:0090336', 'GO:0032259', 'GO:0019827', 'GO:0043457', 'GO:0006357', 'GO:0043586', 'GO:0060021', 'GO:0022008', 'GO:0030512', 'GO:0045893', 'GO:0035019']	8
Contig008484	['GO:0016567']	1
Contig011222	['GO:0050808', 'GO:0006936']	1
Contig003915	['GO:0007224', 'GO:0007389', 'GO:0010467', 'GO:0007225', 'GO:0060538', 'GO:0009953', 'GO:0060541', 'GO:0007368', 'GO:0007517', 'GO:0042445', 'GO:0006508', 'GO:0003002', 'GO:0042886', 'GO:0016485', 'GO:0060539', 'GO:0009880', 'GO:0015833', 'GO:0055085']	9
Contig014912	['GO:0006383', 'GO:0006351', 'GO:0007283', 'GO:0001675', 'GO:0006235', 'GO:0006366', 'GO:0006352', 'GO:0007289', 'GO:0009792', 'GO:0022607']	6
Contig015340	['GO:1904646', 'GO:1901843', 'GO:0098703', 'GO:0098903', 'GO:0045933', 'GO:0086048', 'GO:0070588', 'GO:0034765', 'GO:0060402', 'GO:0006811', 'GO:0060307', 'GO:0086002', 'GO:0086091', 'GO:0006816', 'GO:1902514', 'GO:1901387', 'GO:0061577', 'GO:0051924']	5
Contig004942	[]	0
Contig000639	['GO:0045892', 'GO:0034244', 'GO:0006414']	2
Contig015195	['GO:0051957', 'GO:0051179', 'GO:0051938', 'GO:0009058', 'GO:0008033', 'GO:0042147', 'GO:0030488', 'GO:0002098', 'GO:0010020', 'GO:0034762', 'GO:0006351', 'GO:0006355', 'GO:0032259', 'GO:0006817', 'GO:0006835', 'GO:0009739', 'GO:0009658', 'GO:0006886', 'GO:0006811', 'GO:0045893', 'GO:0055085', 'GO:0006334']	14
Contig015212	['GO:0007010']	1
Contig000882	['GO:0006364', 'GO:0010467']	2
Contig015627	[]	0
Contig004775	['', 'GO:0015884', 'GO:0051726', 'GO:0140361', 'GO:0035461', 'GO:0006855', 'GO:0051180', 'GO:0015711', 'GO:1904447', 'GO:0098838', 'GO:0150104', 'GO:0055085', 'GO:0007565', 'GO:0098656', 'GO:0051958']	5
Contig014839	['GO:0070830', 'GO:0007155', 'GO:0016338']	2
Contig014825	['GO:0045944', 'GO:0043401', 'GO:0060745', 'GO:0034121', 'GO:0071168', 'GO:0045742', 'GO:0043433', 'GO:0007200', 'GO:0032355', 'GO:0050727', 'GO:0007186', 'GO:0010468', 'GO:0060687', 'GO:0051353', 'GO:0043523', 'GO:0045429', 'GO:0046325', 'GO:0090209', 'GO:0000122', 'GO:0045839', 'GO:0060065', 'GO:0030522', 'GO:0051091', 'GO:0071407', 'GO:0045899', 'GO:0055001', 'GO:1904035', 'GO:0050679', 'GO:00…	15
Contig004860	['GO:0060271', 'GO:0003352', 'GO:0060632', 'GO:0030031']	2
Contig012144	['GO:0007264', 'GO:0072659', 'GO:0030033', 'GO:0043087', 'GO:0007265', 'GO:0043547', 'GO:0035556', 'GO:0050790', 'GO:0006508']	4
Contig001625	['GO:0045944', 'GO:0008298', 'GO:0010628', 'GO:0006351', 'GO:0006355', 'GO:0010468', 'GO:0045893']	6
Contig009594	['GO:0071673', 'GO:0043549', 'GO:2000439', 'GO:0051897', 'GO:0071560', 'GO:0042127', 'GO:0048146', 'GO:0072126', 'GO:0001934', 'GO:0050730', 'GO:0043410', 'GO:0045859', 'GO:0071230', 'GO:0008284', 'GO:0031954', 'GO:0048008', 'GO:0030335', 'GO:0036120', 'GO:0070374', 'GO:0043406', 'GO:0070301', 'GO:0048661', 'GO:0051781']	7
Contig007458	['GO:0000278', 'GO:0000209', 'GO:0016567', 'GO:0007049', 'GO:0006511', 'GO:0000086', 'GO:0031146', 'GO:0051301', 'GO:0006508']	7
Contig010662	['GO:0030522', 'GO:0006355', 'GO:0010468', 'GO:0009410', 'GO:0006357', 'GO:0006805', 'GO:0048511']	6
Contig000393	['GO:0016192', 'GO:0061025', 'GO:0006890', 'GO:1902902', 'GO:0015031', 'GO:0048280', 'GO:0045732', 'GO:0006888']	5
Contig008890	['GO:0032092', 'GO:0031032', 'GO:0030036', 'GO:0008360', 'GO:0007049', 'GO:1904478', 'GO:0032880', 'GO:0043393', 'GO:1904778', 'GO:0065003', 'GO:0051301', 'GO:0030866', 'GO:0051924']	6
Contig007428	['GO:0000209', 'GO:0018279', 'GO:0016567', 'GO:0035556', 'GO:0016310', 'GO:0009297', 'GO:0043683', 'GO:0036211', 'GO:0006486', 'GO:0006487', 'GO:0006506', 'GO:0043107', 'GO:0032436', 'GO:0006696', 'GO:0009834', 'GO:0006511', 'GO:0055085', 'GO:0006629']	11
Contig014729	['GO:0044572', 'GO:0016226', 'GO:0044571']	2
Contig006117	['GO:0006644', 'GO:0016311', 'GO:0051491', 'GO:0010976', 'GO:0046839', 'GO:0044255']	2
Contig000289	['GO:0090630', 'GO:1902018', 'GO:1902017', 'GO:0043087', 'GO:0043547']	1
Contig009335	['GO:0045892']	1
Contig012057	['GO:0051276', 'GO:0016310', 'GO:0042147', 'GO:0043001', 'GO:0006895', 'GO:0008104', 'GO:0071539', 'GO:1904781', 'GO:0043328', 'GO:0033365', 'GO:1905515', 'GO:0030030', 'GO:0034394', 'GO:0006896', 'GO:0009116', 'GO:0035652', 'GO:0071763', 'GO:0007049', 'GO:0000160', 'GO:0072330', 'GO:0015031', 'GO:0006139', 'GO:0051225', 'GO:0010457', 'GO:0000278', 'GO:0007034', 'GO:0016192', 'GO:0050908', 'GO:00…	19
Contig006873	['GO:0030166', 'GO:0050650', 'GO:0016051', 'GO:0005975', 'GO:0044085', 'GO:0006486', 'GO:0000271']	4
Contig009857	['GO:0046513', 'GO:0005975', 'GO:0006643', 'GO:0006024', 'GO:0006486', 'GO:0006688', 'GO:0070085', 'GO:0001572', 'GO:0006629', 'GO:0018146']	3
Contig015510	['GO:0032922', 'GO:0002638', 'GO:0006665', 'GO:0001675', 'GO:0022414', 'GO:0046466', 'GO:0007339']	4
Contig000893	['GO:0042254', 'GO:0070925', 'GO:0022414', 'GO:0007399', 'GO:0042255', 'GO:1905941', 'GO:0050793', 'GO:0000462', 'GO:2000243', 'GO:0010467', 'GO:0007420', 'GO:0006996', 'GO:0042274', 'GO:0006364', 'GO:0048026', 'GO:2000020']	9
Contig014835	['GO:0007264', 'GO:0022008', 'GO:0090630', 'GO:0051056', 'GO:0045595', 'GO:0050772', 'GO:0050767', 'GO:0035556', 'GO:0043547', 'GO:0050790']	5
Contig002764	['GO:0008544', 'GO:0007160', 'GO:0030198', 'GO:0031581', 'GO:0048925', 'GO:0035821']	3
Contig007483	['GO:1903999', 'GO:0007204', 'GO:0070374', 'GO:0007186', 'GO:0007218', 'GO:0060013', 'GO:2000293', 'GO:0051928', 'GO:0042755', 'GO:0051279', 'GO:0051281']	3
Contig001843	['GO:0007186', 'GO:0070098', 'GO:0035435', 'GO:0055085', 'GO:0043410', 'GO:0045087', 'GO:0032297', 'GO:0051781', 'GO:0006955', 'GO:0048247', 'GO:0051301', 'GO:0070374', 'GO:0006576', 'GO:0006414', 'GO:0070555', 'GO:0060326', 'GO:0042274', 'GO:0071347', 'GO:0009615', 'GO:0000028', 'GO:0019221', 'GO:0043547', 'GO:0034097', 'GO:0050902', 'GO:0001775', 'GO:0071356', 'GO:0008152', 'GO:0030593', 'GO:00…	22
Contig015267	['GO:0007283', 'GO:0007186', 'GO:0071407', 'GO:0048545', 'GO:0008285', 'GO:0071396', 'GO:0071385', 'GO:0007187', 'GO:0007218', 'GO:0021549', 'GO:0030900', 'GO:0009725', 'GO:0030432', 'GO:0071392', 'GO:0007193', 'GO:0042594', 'GO:0032870', 'GO:0038170', 'GO:0006937']	8
Contig006569	['GO:0001649', 'GO:0030574', 'GO:0045087', 'GO:0006897', 'GO:0002376']	5
Contig004227	['GO:0022414', 'GO:0060378', 'GO:0030317', 'GO:0060271', 'GO:0048609', 'GO:0060294']	3
Contig007361	['GO:0071699', 'GO:0051965', 'GO:0021628']	0
Contig008081	['GO:0010359', 'GO:0002244', 'GO:0044070', 'GO:0032880', 'GO:0030336', 'GO:0090314', 'GO:0030335', 'GO:1901529', 'GO:0032412', 'GO:0006355', 'GO:0010360']	4
Contig011969	['GO:1901698', 'GO:0007212', 'GO:1903351', 'GO:0071407', 'GO:0065003', 'GO:0016197', 'GO:0048268']	4
Contig007699	['GO:0007186', 'GO:0035589', 'GO:0007194']	2
Contig007650	['GO:0043393', 'GO:0046677', 'GO:0032088', 'GO:0034976', 'GO:0010629', 'GO:0010804', 'GO:0000082', 'GO:0008637', 'GO:0042542', 'GO:1904528', 'GO:0006470', 'GO:0043433', 'GO:0000278', 'GO:0043161', 'GO:0010288', 'GO:0046580', 'GO:0010468']	7
Contig004549	['GO:0008104']	0
Contig001418	[]	0
Contig009005	['GO:0055085', 'GO:0006811', 'GO:0050482', 'GO:0008645', 'GO:0006644', 'GO:0015755', 'GO:1904659', 'GO:0008643', 'GO:0016042', 'GO:0015749']	6
Contig002568	['GO:0034122', 'GO:0034142', 'GO:0031929', 'GO:0043549', 'GO:0002224', 'GO:0034123', 'GO:0034134', 'GO:0034162', 'GO:0042325', 'GO:0050727', 'GO:0034154', 'GO:0016310', 'GO:0032869', 'GO:0051897']	5
Contig008676	['GO:0007411', 'GO:0050878', 'GO:0006508', 'GO:0045598', 'GO:0016525', 'GO:0001944', 'GO:0048856', 'GO:0007219', 'GO:0045746', 'GO:0050793', 'GO:0008593']	7
Contig002759	['GO:0042130', 'GO:2000404', 'GO:0046777', 'GO:0006044', 'GO:0006935', 'GO:0006816', 'GO:0001934', 'GO:0001808', 'GO:2000406', 'GO:0045944', 'GO:0043615', 'GO:0002296', 'GO:0097190', 'GO:0006689', 'GO:0007166', 'GO:0006811', 'GO:0001573', 'GO:0042102', 'GO:0050776', 'GO:0042742', 'GO:0006687', 'GO:0019915', 'GO:0007163', 'GO:0042552', 'GO:0048477', 'GO:0001501', 'GO:1901135', 'GO:0051651', 'GO:00…	40
Contig002903	['GO:0007049', 'GO:0007088', 'GO:0051301', 'GO:0051983', 'GO:0009245', 'GO:0097190', 'GO:0008152', 'GO:0009247', 'GO:0008654', 'GO:0006915', 'GO:0061640', 'GO:0006629', 'GO:0006644', 'GO:0006351', 'GO:2001289', 'GO:0009312', 'GO:0008104', 'GO:0016310', '', 'GO:0006508', 'GO:0090304']	13
Contig011594	['GO:0071277', '']	0
Contig002119	['GO:0006406', 'GO:0051028', 'GO:0006606', 'GO:0006913', 'GO:0015031']	5
Contig014288	['GO:0006281', 'GO:0000727', 'GO:0051321', 'GO:0046597', 'GO:0006310', 'GO:0022414', 'GO:0045930', 'GO:0032206', 'GO:0044818', 'GO:0007129', 'GO:0000729', 'GO:0035825', 'GO:0034599', 'GO:0000723', 'GO:0010780', 'GO:0031573', 'GO:0008283', 'GO:0031954', 'GO:0035753', 'GO:0007062', 'GO:0010791', 'GO:0051276', 'GO:0000706', 'GO:0006896', 'GO:0008152', 'GO:0000725', 'GO:0006302', 'GO:0000019', 'GO:00…	27
Contig008353	['GO:0006281', 'GO:0051321', 'GO:0006310', 'GO:0007098', 'GO:0035264', 'GO:0043524', 'GO:0001756', 'GO:0008152', 'GO:2000269', 'GO:0042148', 'GO:0006974', 'GO:0010165', 'GO:0000724', 'GO:0000278', 'GO:0022008', 'GO:0050769', 'GO:0000226', 'GO:0090304', 'GO:0010332', 'GO:0001701']	12
Contig008159	['GO:0006397']	1
Contig002391	[]	0
Contig005251	['GO:0006412', 'GO:0002181', 'GO:0061844', 'GO:0010467', 'GO:0031640', 'GO:0009617', 'GO:0050829']	3
Contig015715	['GO:0032446', 'GO:0007612', 'GO:0006511', 'GO:0021766', 'GO:0060996', 'GO:0006508', 'GO:0006974', 'GO:0007626', 'GO:0036211', 'GO:0016567', 'GO:0021764']	5
Contig005045	['GO:0001523', 'GO:0055088', 'GO:1901615', 'GO:0006629', 'GO:0042572', 'GO:0042445', 'GO:0019433', 'GO:0016042']	5
Contig014607	['GO:0035556', 'GO:0014883', 'GO:0042127', 'GO:1902459', 'GO:1902895', 'GO:0010468', 'GO:0045944', 'GO:0071300', 'GO:0030903', 'GO:0030307', 'GO:0045893', 'GO:0048568', 'GO:0007507', 'GO:0006355', 'GO:0003143', 'GO:0006357', 'GO:0071902', 'GO:0048368', 'GO:0035329', 'GO:0065003', 'GO:0048339']	10
Contig008228	['GO:0008203', 'GO:0042474', 'GO:1901615', 'GO:0006695', 'GO:0071407', 'GO:0006991', 'GO:0010894', 'GO:0060021', 'GO:0070542', 'GO:0060363', 'GO:0036316', 'GO:0008202', 'GO:0032868', 'GO:0042472', 'GO:0006629', 'GO:0045717', 'GO:0032933', 'GO:0016126', 'GO:0033993', 'GO:0006641', 'GO:0032869']	9
Contig005222	[]	0
Contig015785	['GO:0001654', 'GO:0006955', 'GO:0051260', 'GO:0006082', 'GO:0072593', 'GO:0007275', 'GO:0030199', 'GO:0070207', 'GO:0071711', 'GO:0007155', 'GO:0001960', 'GO:0048598', 'GO:0030198', 'GO:0098869', 'GO:0070831', 'GO:0048679', 'GO:0048513', 'GO:0001525', 'GO:0042744', 'GO:0010172', 'GO:0006979']	13
Contig002771	['GO:0022414', 'GO:0007286', 'GO:0030030', 'GO:0061512', 'GO:0030317', 'GO:0007368', 'GO:0007288', 'GO:0007281', 'GO:0035082', 'GO:0120229', 'GO:0001578', 'GO:0099111', 'GO:0036159', 'GO:0060271', 'GO:0060285', 'GO:0044458', 'GO:0008104', 'GO:0006858', 'GO:0030705', 'GO:0120317', 'GO:0007219', 'GO:0120316', 'GO:0003341']	10
Contig013256	['GO:0008333', 'GO:0007049', 'GO:0032880', 'GO:0047496', 'GO:0007018', 'GO:0051301', 'GO:0046907', 'GO:0006886', 'GO:0032438', 'GO:0006996', 'GO:0072383', 'GO:0036049', 'GO:0032465', 'GO:0008104', 'GO:0043001', 'GO:0006476', 'GO:0035459', 'GO:0016192', 'GO:0048731', 'GO:0015031']	10
Contig002351	['GO:0046475', 'GO:0016042', 'GO:0009395', 'GO:0006629']	3
Contig011219	['GO:0035821', 'GO:0070831', 'GO:0007155', 'GO:0003229', 'GO:0098609', 'GO:0048873', 'GO:0061050', 'GO:0030198', 'GO:0030199']	5
Contig013234	['GO:0001666', 'GO:1902074', 'GO:0034696', 'GO:0006885', 'GO:0007186', 'GO:0019722', 'GO:0086100', 'GO:0044751', 'GO:1903537', 'GO:0051771', 'GO:0032496', 'GO:0042482', 'GO:0003357', 'GO:0051930', 'GO:0014034', 'GO:0061626', 'GO:0008284', 'GO:0014824', 'GO:0031175', 'GO:0001934', 'GO:0051353', 'GO:0051899', 'GO:0001558', 'GO:0045840', 'GO:0006939', 'GO:0045944', 'GO:0035050', 'GO:0071373', 'GO:00…	39
Contig005875	['GO:0006270', 'GO:0000462', 'GO:0000727', 'GO:0006412', 'GO:0007049', 'GO:0030174', 'GO:0006281', 'GO:0022414', 'GO:0006267', 'GO:1902969', 'GO:0008406', 'GO:0040011', 'GO:0006279', 'GO:0051301', 'GO:0090329', 'GO:0006139', 'GO:0051276', '', 'GO:0008152', 'GO:1902975', 'GO:0006275', 'GO:0001878', 'GO:0033260', 'GO:0006260', 'GO:0006268', 'GO:0000724', 'GO:0034214', 'GO:0000278', 'GO:0006261', 'G…	18
Contig010080	['GO:0006511', 'GO:0006508', 'GO:0051896', 'GO:0044830', 'GO:0031146', 'GO:0036211', 'GO:0010506', 'GO:0006513', 'GO:0016567']	5
Contig011327	['GO:0016310']	1
Contig001750	[]	0
Contig004902	['GO:1990573', 'GO:0034765', 'GO:0006811', 'GO:0034220', 'GO:0071805', 'GO:0006813']	6
Contig003544	['GO:0021757', 'GO:0021544', 'GO:0000122', 'GO:0009791', 'GO:0060501', 'GO:0021549', 'GO:0030900', 'GO:0042297', 'GO:0045471', 'GO:0007519', 'GO:0098582', 'GO:0021758', 'GO:0045892', 'GO:0071625', 'GO:0021702', 'GO:0050679', 'GO:0043010', 'GO:0006355', 'GO:0048745', 'GO:0006357', 'GO:0030324', 'GO:0010467', 'GO:0060013', 'GO:0021987', 'GO:0060502', 'GO:0002053', 'GO:0048731', 'GO:0048286']	7
Contig009501	['GO:0002735', 'GO:0045087', 'GO:0043123', 'GO:0006338', 'GO:0062176', 'GO:0045944', 'GO:0043330', 'GO:0045893', 'GO:0008152', 'GO:0000375', 'GO:0001649', 'GO:0009615', 'GO:0006260', 'GO:0051607', 'GO:0008380', 'GO:0045943', 'GO:0006351', 'GO:0002376', '', 'GO:0006366', 'GO:0010467', 'GO:0006364', 'GO:0045945']	14
Contig011910	['GO:0035331', 'GO:0032475', 'GO:0046621', 'GO:0035330', 'GO:0046620', 'GO:0048640', 'GO:0043410', 'GO:0032386', 'GO:0016477', 'GO:0035332', 'GO:0009966', 'GO:0030010', 'GO:0006355', 'GO:0005975', 'GO:0045893', 'GO:0071599', 'GO:0009968', 'GO:0000122']	8
Contig014499	['GO:0032543', 'GO:0009653']	2
Contig015693	['GO:1901028', 'GO:0097194', 'GO:0042981', 'GO:0010039', 'GO:0042542', 'GO:0007413', 'GO:0046670', 'GO:0043525', 'GO:0060545', 'GO:0030855', 'GO:0002218', 'GO:0097284', '', 'GO:0070269', 'GO:0072332', 'GO:0006915', 'GO:0043065', 'GO:0034097', 'GO:0072734', 'GO:0009749', 'GO:0016540', 'GO:0097202', 'GO:0006508', 'GO:0002525']	10
Contig014515	[]	0
Contig011612	['GO:0050766', 'GO:0010628', 'GO:0043320', 'GO:0051904', 'GO:1903435', 'GO:0043473', 'GO:1903307', 'GO:1903428', 'GO:2000379', 'GO:0017157', 'GO:0051875', 'GO:0019882', 'GO:0097278', 'GO:0032400', 'GO:0006605', 'GO:0048489', 'GO:0045055', 'GO:0008104', 'GO:0006887', 'GO:0071985', 'GO:0036257', 'GO:0007032', 'GO:0045921', 'GO:0051650', 'GO:0007596', 'GO:0016192', 'GO:0051649', 'GO:0032402', 'GO:00…	12
Contig001409	['GO:0043086', 'GO:0050819']	1
Contig009116	['GO:0035821']	1
Contig005862	['GO:0050714', 'GO:0035556', 'GO:0010737', 'GO:0006936', 'GO:0010628', 'GO:0002074', 'GO:0032880', 'GO:0007010']	5
Contig004332	['GO:0031667', 'GO:0032501', 'GO:0048364', 'GO:0006082', 'GO:0009612', 'GO:0016311', 'GO:0008652', 'GO:0048149', 'GO:0048856', 'GO:0007275', 'GO:0006520', 'GO:0006563', 'GO:0000096', 'GO:0009793', 'GO:0032502', 'GO:0033574', 'GO:0009555', 'GO:0006564', 'GO:0001701']	7
Contig010441	['GO:0034067', 'GO:0016197', 'GO:0090150', 'GO:0007369', 'GO:0046907', 'GO:0006886', 'GO:0072659', 'GO:0042147', 'GO:0008104', 'GO:0043001', 'GO:0034976', 'GO:0033365', 'GO:0016192', 'GO:0006892', 'GO:0051649', 'GO:0051641', 'GO:0048731', 'GO:0015031']	12
Contig002352	['GO:0046475', 'GO:0016042', 'GO:0009395', 'GO:0006629']	3
Contig007678	['GO:0042177', 'GO:0007283', 'GO:0006541', 'GO:0042981', 'GO:0006528', 'GO:0046697', 'GO:1901837', 'GO:0006107', 'GO:0008625', 'GO:0006915']	4
Contig007003	[]	0
Contig005631	['GO:0006355', 'GO:0006357', 'GO:0000122', 'GO:0002244']	3
Contig010391	[]	0
Contig006901	['GO:0016567']	1
Contig007289	['GO:0034472', 'GO:0008152', 'GO:0010467']	3
Contig012485	[]	0
Contig002717	['GO:0035556', 'GO:0019722', 'GO:0008016', 'GO:1903766', 'GO:0097623', 'GO:0006813', 'GO:0086009', 'GO:1903818', 'GO:0005513', 'GO:1901379', 'GO:0034765', 'GO:0006811', 'GO:0071805', 'GO:0030182', 'GO:0006936', 'GO:0007268', 'GO:0045163', 'GO:0086013']	10
Contig010030	['GO:0001666', 'GO:0007049', 'GO:0043393', 'GO:0042981', 'GO:0032880', '', 'GO:0043408', 'GO:0042127', 'GO:0007088', 'GO:0043524', 'GO:0010468', 'GO:0032092', 'GO:0043525', 'GO:0001934', 'GO:0042177', '', 'GO:0070373', 'GO:0045944', 'GO:0031398', 'GO:0019222', 'GO:1900180', 'GO:0030512', 'GO:0080090', 'GO:0090263', 'GO:0042325', 'GO:0050821', 'GO:0043547', 'GO:0001932', 'GO:0030182', 'GO:0032465'…	17
Contig001421	['GO:0018243', 'GO:0006486', 'GO:0006493', 'GO:0016266']	2
Contig013288	['GO:0009268', 'GO:0010447', 'GO:0055085', 'GO:0006812', 'GO:0071467', 'GO:0007269', 'GO:0001662', 'GO:0006816', 'GO:0035725', 'GO:0050915', 'GO:0042391', 'GO:0070207', 'GO:0006814', 'GO:0006811', 'GO:0098662', 'GO:0034220', 'GO:0023052', 'GO:0046929', 'GO:0050909', 'GO:0001975', 'GO:0050896', 'GO:0007613', 'GO:0019233', 'GO:0070588', 'GO:0051649', 'GO:0008306']	12
Contig000928	['GO:0006081', 'GO:0044281', 'GO:0046487', 'GO:0044237', 'GO:0006082']	2
Contig001430	['', 'GO:0007186', 'GO:0071230', 'GO:0060079', 'GO:0051260', 'GO:1902476', 'GO:0071294', 'GO:0007218', 'GO:0006821', 'GO:0071361', 'GO:0042391', 'GO:0043200', 'GO:0006811', 'GO:0050877', 'GO:0099171', 'GO:0034220', 'GO:0060078', 'GO:0060012', 'GO:0007268', 'GO:0099536']	11
Contig010022	['GO:0045494']	1
Contig000565	['GO:0032968', 'GO:0007049', 'GO:0050790', '', 'GO:0019085', 'GO:0043549', 'GO:0034243', 'GO:0051301', 'GO:0001934', 'GO:0006468', 'GO:0045944', 'GO:0045737', 'GO:0007519', 'GO:0000079', 'GO:0051147', 'GO:0032147', 'GO:0019086', 'GO:0006351', 'GO:0043923', 'GO:0051726', 'GO:0032786', 'GO:0006366', 'GO:0006357', '', 'GO:0032784']	8
Contig013956	['GO:0052548', 'GO:0010628', 'GO:2001243', 'GO:0022414', '', 'GO:0001654', 'GO:1901615', 'GO:2000273', 'GO:0032496', 'GO:1902459', 'GO:0034599', 'GO:0061029', 'GO:0006338', 'GO:0032732', 'GO:0008284', 'GO:0032922', 'GO:0043922', 'GO:0042180', 'GO:0008285', 'GO:0043524', 'GO:1900221', 'GO:0010468', 'GO:0000122', 'GO:0009888', 'GO:0042475', 'GO:0045944', 'GO:1902455', 'GO:0009913', 'GO:0006066', 'G…	21
Contig015938	['GO:1901740', 'GO:0055001', 'GO:0007517', 'GO:0042246', 'GO:0051146', 'GO:1901739', 'GO:0014906', 'GO:0014908', 'GO:0045662']	1
Contig015445	['GO:0035627', 'GO:0006869', 'GO:0046836', 'GO:1902389', 'GO:0120009', 'GO:0035621', 'GO:0015031']	3
Contig009243	['GO:0008152', 'GO:0010628', 'GO:0010467', 'GO:0032259', 'GO:0006417', 'GO:0031167', 'GO:0006364', 'GO:0044238', 'GO:0043414', 'GO:0045727']	8
Contig015821	['GO:0006468', 'GO:0021522', 'GO:0016477', 'GO:0048666', 'GO:0016310', 'GO:0008104', 'GO:0006954']	4
Contig015138	['GO:0035556', 'GO:0006281', 'GO:0046777', 'GO:0007186', 'GO:0019222', 'GO:0019219', 'GO:0018105', 'GO:0000723', 'GO:0032204', 'GO:0006468', 'GO:0006139', 'GO:0008152', 'GO:0080135', 'GO:0000077', 'GO:0006661', 'GO:0006974', 'GO:0010629', 'GO:0023052', 'GO:1904262', 'GO:0000184', 'GO:0010507', 'GO:0031929', 'GO:0006406', 'GO:0016242', 'GO:0006974', 'GO:0016310', 'GO:0046854', 'GO:0006259']	18
Contig014349	[]	0
Contig010958	['GO:0016197', 'GO:0006897', 'GO:0006457']	2
Contig007461	['GO:0008360', 'GO:0030050', 'GO:0022409', 'GO:0046907', 'GO:0051489', 'GO:0030705', 'GO:0007015', 'GO:0048870', 'GO:0048731']	7
Contig008934	['GO:0051726', 'GO:0001933', 'GO:0010564', 'GO:0001764', 'GO:0006469', 'GO:0007059', 'GO:0046602', 'GO:0043549']	4
Contig006417	['GO:0006909', 'GO:0045921', 'GO:0061789', 'GO:0043320', 'GO:0051607', 'GO:0046903', 'GO:0051649', 'GO:1900026', 'GO:1903307', 'GO:0043304', 'GO:0002432', 'GO:0006887', 'GO:0002467']	4
Contig006886	['GO:0042127', 'GO:0048741', 'GO:0030036', 'GO:0030031', 'GO:0120036', 'GO:0006941', 'GO:0046907', 'GO:0060271', 'GO:0007519', 'GO:0031269', 'GO:0045214', 'GO:2001014', 'GO:0035914', 'GO:0045595', 'GO:2000291', 'GO:0007517', 'GO:0045661', 'GO:0030239', 'GO:0016567']	8
Contig012707	['GO:0035821', 'GO:0007283', 'GO:0006952', 'GO:0045087', 'GO:0098609', 'GO:0007399']	6
Contig009240	['GO:0007399', 'GO:1904862', 'GO:0007416']	2
Contig008962	['GO:0010628', 'GO:0061029', 'GO:0042060', 'GO:0007417', 'GO:0007389', 'GO:0032956', 'GO:0001843', 'GO:0008544', 'GO:0009888', 'GO:0045944', 'GO:0001736', 'GO:0060325', 'GO:0048703', 'GO:0090504', 'GO:0051493', 'GO:0045893', 'GO:0090103', 'GO:0043547', 'GO:0001841', 'GO:0007398', 'GO:0006366', 'GO:0006357', 'GO:0071466', 'GO:0010467', 'GO:0030917', 'GO:0061436', '']	11
Contig004644	['GO:0016310', 'GO:0098962']	1
Contig001469	['GO:0051923']	0
Contig000875	['GO:0048583', 'GO:0001934', 'GO:0007049', 'GO:0060325', 'GO:0006355', 'GO:0006261', 'GO:0016310', 'GO:0001701']	7
Contig003722	['GO:0007411', 'GO:0007155', 'GO:0016043', 'GO:0030534', 'GO:0048675', 'GO:0060219', 'GO:1904071', 'GO:2000807', 'GO:0007156', 'GO:0060041', 'GO:0099560', 'GO:0050805', 'GO:0007399']	6
Contig014884	['GO:0005978', 'GO:0044255', 'GO:0005975', 'GO:0010021', 'GO:0005975', 'GO:0006914', 'GO:0043170', 'GO:0008610', 'GO:0005976', 'GO:0008152', 'GO:0005983', 'GO:0016310', 'GO:0006646']	8
Contig007847	['GO:0001654', 'GO:0001754', 'GO:0030182', 'GO:0042462']	2
Contig011351	[]	0
Contig002160	['GO:1905606', 'GO:0007417', 'GO:0019221', 'GO:0034097']	2
Contig007085	['GO:0043085', 'GO:0033693', 'GO:0006417', 'GO:0000972', 'GO:0034398', 'GO:0006606', 'GO:0045109', 'GO:0030031', 'GO:0001552', 'GO:0048790', 'GO:1990830', 'GO:0006325', 'GO:0015031', 'GO:0010212', 'GO:0046928', 'GO:0070478', 'GO:0048232', 'GO:0007020', 'GO:0099170', 'GO:0051726', 'GO:0090267', 'GO:1902513', 'GO:0043086', 'GO:0035556', 'GO:0006281', 'GO:0046827', 'GO:0006334', 'GO:0042307', 'GO:00…	55
Contig009952	[]	0
Contig011072	['GO:0019222', 'GO:2000134', 'GO:0010821', 'GO:0006626', 'GO:0030098', 'GO:0000422', '', '', 'GO:0010975', 'GO:0010506', '', 'GO:0050881', 'GO:0006511', 'GO:0007005', 'GO:0006605', 'GO:0045620', 'GO:0031647', 'GO:0040012', 'GO:0045736', 'GO:0008104', 'GO:1903599', 'GO:1902882', 'GO:0006508', 'GO:0016567']	8
Contig000524	[]	0
Contig014248	['GO:0044255', 'GO:0006633', 'GO:0030497', 'GO:0044249', 'GO:0008610', 'GO:0042761', 'GO:0019368', 'GO:0006629', 'GO:0034625', 'GO:0034626', 'GO:0030148', 'GO:0019367', 'GO:0006631']	10
Contig008416	['GO:0006955', 'GO:0045746', 'GO:0010468', 'GO:1900020', 'GO:1902806', 'GO:0010739', 'GO:0009408', 'GO:0006915', 'GO:1903706', 'GO:0002264', 'GO:1901222', '', 'GO:0051726', 'GO:0006355', 'GO:0010564', 'GO:0042118', 'GO:1901224', 'GO:0043066', 'GO:0034605', 'GO:0008593']	12
Contig012000	['GO:0017148', 'GO:0006412', 'GO:0006417', 'GO:0000082', 'GO:0099578', 'GO:0010468', 'GO:0001662', 'GO:0006413', 'GO:0006897', 'GO:0016070', 'GO:0010629', 'GO:0051607', 'GO:0030182', 'GO:0071549', 'GO:0045931', 'GO:0019827', 'GO:0045665', 'GO:0030324', 'GO:0010467']	11
Contig009590	['GO:0051965', 'GO:0099151', 'GO:0002091', 'GO:0060291', 'GO:0050808']	0
Contig014354	['GO:0007368', 'GO:0001822', 'GO:0060041', 'GO:1905515', 'GO:0090522', 'GO:0001736', 'GO:0090148', 'GO:0042461', 'GO:0045494', 'GO:0060271', 'GO:0009653', 'GO:0072659', 'GO:0010842', 'GO:1904019', 'GO:0006893', 'GO:0048793', 'GO:0006887', 'GO:0000281', 'GO:0006904', 'GO:0035845', 'GO:0032402', 'GO:0006892', 'GO:0015031']	14
Contig002229	['GO:0000462', 'GO:0051301', 'GO:0000463', 'GO:0033365', 'GO:0006612', 'GO:0006605', 'GO:0046907', 'GO:0051179', 'GO:0042816', 'GO:0006644', 'GO:0006913', 'GO:0098869', 'GO:0046839', 'GO:0006614']	11
Contig006233	['GO:0006919', 'GO:0035556', 'GO:0042981', 'GO:2000045', 'GO:0006626', 'GO:0010918', 'GO:0090200', 'GO:0090150', 'GO:2001238', 'GO:0097345', 'GO:0097284', 'GO:0008637', 'GO:2001244', 'GO:1902108', 'GO:0006915', 'GO:0043065', 'GO:0001836', 'GO:0007005', 'GO:1902230', 'GO:0031334', 'GO:0012501', 'GO:0006974', 'GO:2001235', 'GO:2000271', 'GO:0008625', 'GO:0051402', 'GO:2001233', 'GO:0097435', 'GO:00…	11
Contig002792	['GO:0015908', 'GO:0010747', 'GO:2001236', 'GO:0008610', 'GO:0010867', 'GO:0006629', 'GO:0032000', 'GO:0001676', 'GO:0035338', 'GO:0008654', 'GO:0008152', 'GO:0006631']	8
Contig010484	['GO:0006919', 'GO:2000987', 'GO:0031667', 'GO:0051930', 'GO:0008284', 'GO:0014049', 'GO:0050731', 'GO:1904058', 'GO:0048812', 'GO:0008542', 'GO:0032099', 'GO:0007586', 'GO:0007631', 'GO:0007409', 'GO:0006915', 'GO:0043065', 'GO:0001836', 'GO:0031334', 'GO:2000986', 'GO:0032094', 'GO:0001764', 'GO:0030182', 'GO:0007200', 'GO:0022008', 'GO:0007613', 'GO:0042755', 'GO:0016477', 'GO:0051901', 'GO:00…	12
Contig000487	['GO:0006886', 'GO:0006605', 'GO:0016192', 'GO:0008104', 'GO:0015031']	4
Contig012493	['GO:0042246', 'GO:0007155']	2
Contig004235	['GO:0006869', 'GO:0032880', 'GO:0035774', 'GO:0015914', 'GO:0120009', 'GO:0090277']	3
Contig014772	['GO:0014070', 'GO:0009617', 'GO:0043410', 'GO:0032496', 'GO:0006955', 'GO:0071812', 'GO:0033209', 'GO:0072674', 'GO:0060749', 'GO:0051091', 'GO:0048534', 'GO:0008284', 'GO:0007267', 'GO:0001659', 'GO:0010468', 'GO:0043549', 'GO:0001934', 'GO:0001503', 'GO:0070374', 'GO:0009612', 'GO:0009314', 'GO:0070555', 'GO:0043507', 'GO:0050727', 'GO:0033209', 'GO:0007275', 'GO:0048535', 'GO:0034224', 'GO:00…	13
Contig008893	['GO:0006412', 'GO:0010468', 'GO:0001514', 'GO:0010467']	2
Contig009110	['GO:0006302', 'GO:0071932']	1
Contig011621	['GO:0034203', 'GO:0044255', 'GO:0046836', 'GO:0006486', 'GO:0006487', 'GO:0006488', 'GO:0097035', 'GO:0008643']	5
Contig012141	['GO:0015698', 'GO:1903146', 'GO:0007612', 'GO:2000378', 'GO:0098656', 'GO:0030855', 'GO:0055085', 'GO:0006811', 'GO:0043066', 'GO:0006820', 'GO:0110099', 'GO:0007270', 'GO:1905091', 'GO:0007268', 'GO:0006851', 'GO:0001662', 'GO:0006915']	9
Contig014480	['GO:0051301', 'GO:0007049', 'GO:0042326', 'GO:0019222', 'GO:0043066', 'GO:0050790', 'GO:0042325', '', 'GO:0007417', 'GO:0007084']	4
Contig011107	['GO:2000003', 'GO:0032006', 'GO:0050821', 'GO:0006397', 'GO:0008380', 'GO:0006338', 'GO:0000398']	5
Contig015761	['GO:0043547']	0
Contig003812	['GO:0031648', 'GO:0007186', 'GO:0031408', 'GO:0007030', 'GO:0042026', 'GO:0006633', 'GO:0051604', 'GO:0009408', 'GO:0031047', 'GO:0006952', 'GO:0006811', 'GO:0010492', 'GO:0060250', 'GO:0031647', 'GO:0009966', 'GO:1900366', 'GO:0008104', 'GO:0032456', 'GO:0051641', 'GO:0006824', 'GO:0050793', 'GO:0034394', 'GO:0048364', 'GO:0010311', 'GO:0051345', 'GO:0006631', 'GO:0034440', 'GO:0070669', 'GO:00…	36
Contig002257	['GO:0006366', 'GO:0046843', 'GO:0006357', 'GO:0007304', 'GO:0009996', 'GO:0043066', 'GO:0008340', 'GO:0001751', 'GO:0042127', 'GO:0007297', 'GO:0042246', 'GO:0008284', 'GO:0016319', 'GO:0030307', 'GO:0036335', 'GO:0002052']	6
Contig010691	['GO:0007605', 'GO:0000380', 'GO:0007049', 'GO:0050871', 'GO:0030030', 'GO:0060632', 'GO:0045087', 'GO:0061512', 'GO:0030317', 'GO:0090660', 'GO:0007368', 'GO:0007018', 'GO:0000398', 'GO:0000389', 'GO:0120197', 'GO:0009987', 'GO:0006397', 'GO:0046907', 'GO:0006911', 'GO:0006897', 'GO:0050853', 'GO:0006376', 'GO:0009408', 'GO:0046629', 'GO:0006886', 'GO:0000375', 'GO:0050877', 'GO:0044085', 'GO:00…	25
Contig008072	['GO:0050731', 'GO:0038063', 'GO:0098953', 'GO:0070527']	1
Contig012121	['GO:0006511', 'GO:0006508', 'GO:0016567', 'GO:0031146', 'GO:0009416', 'GO:0009649', 'GO:0048511', 'GO:0044772', 'GO:0000086', 'GO:0051726', 'GO:0043153']	9
Contig006577	['GO:0035556', 'GO:0046777', 'GO:0042127', 'GO:0043123', 'GO:0008284', 'GO:0010594', 'GO:0006468', 'GO:0072359', 'GO:1900745', 'GO:2000773', 'GO:0009948', 'GO:0001568', 'GO:0030335', 'GO:1902533', 'GO:0007507', 'GO:0071864', 'GO:0000165', 'GO:0090050', 'GO:0016310']	9
Contig001929	['GO:0006412', 'GO:0045333', 'GO:0010467', 'GO:0006099', 'GO:0006637', 'GO:0006105', 'GO:0006104', 'GO:1901289', 'GO:0008152']	5
Contig008316	['GO:0009889', 'GO:0009306', 'GO:0042984', 'GO:0019538']	3
Contig014702	['GO:1904427', 'GO:0070447', 'GO:0010628', 'GO:0055085', 'GO:0010644', 'GO:2000134', 'GO:0001932', 'GO:0009636', 'GO:0007267', 'GO:0007420']	6
Contig011517	['GO:0043410', 'GO:0045087', 'GO:0044344', 'GO:0070374', 'GO:0050731', 'GO:2000392', 'GO:0098609', 'GO:1902166', 'GO:0007160', 'GO:1900625', 'GO:0007155', 'GO:0034116', 'GO:0043518', 'GO:0051216', 'GO:0030214', 'GO:0070487', 'GO:0034097', 'GO:0002376', 'GO:0033138', 'GO:0043066', 'GO:0016477', 'GO:0042110', 'GO:0043154', 'GO:0019221', 'GO:0044319', 'GO:0006954']	11
Contig007740	[]	0
Contig009686	['GO:0060218', 'GO:0044281', 'GO:0006547', 'GO:0019556', 'GO:0006548', 'GO:0019557', 'GO:0006559']	4
Contig011058	[]	0
Contig006422	['GO:0019395', 'GO:0009058', 'GO:0007283', 'GO:0009062', 'GO:0016559', 'GO:0006693', 'GO:0055088', 'GO:0140493', 'GO:0006629', 'GO:0033540', 'GO:0000038', 'GO:0006635', 'GO:0042632', 'GO:0006091', 'GO:0001676', 'GO:0046395', 'GO:0050665', 'GO:0006631']	9
Contig013658	['GO:0043086', 'GO:0035556', 'GO:0001933', 'GO:0050790', 'GO:0061099', 'GO:0006469', 'GO:0043549']	2
Contig005754	['GO:0006508', 'GO:0016567', 'GO:0006511']	3
Contig002356	['GO:0046475', 'GO:0016042', 'GO:0009395', 'GO:0006629']	3
Contig012129	['GO:0030030', 'GO:0060271', 'GO:0045880']	2
Contig005177	['GO:0003281', 'GO:0042311', 'GO:0055085', 'GO:0098906', 'GO:0003151', 'GO:0086005', 'GO:0007601', 'GO:1900133', 'GO:0010643', 'GO:0010644', 'GO:0003193', 'GO:0060371', 'GO:0086054', 'GO:0007267', 'GO:0086044', 'GO:0098905', 'GO:0030326', 'GO:0060412', 'GO:0061337', 'GO:0003158', 'GO:0009888', 'GO:0048738', 'GO:0001501', 'GO:0003170', 'GO:0097746', 'GO:0060413', 'GO:0006813', 'GO:0035050', 'GO:00…	11
Contig013335	['GO:0008203', 'GO:0006869', 'GO:0006996', 'GO:0006629', 'GO:0071391', 'GO:0000280', 'GO:0008202']	6
Contig000783	['GO:0022604', 'GO:0046578', 'GO:0042074', 'GO:0050790', 'GO:0032012', 'GO:0008277', 'GO:0016192', 'GO:0009966', 'GO:0051649', 'GO:0036465', 'GO:0016310', 'GO:0007420']	8
Contig003712	['GO:0006029', 'GO:0001937', 'GO:0050680', 'GO:0001501', 'GO:0030948', 'GO:0007585', 'GO:0051216', 'GO:0001886', 'GO:0042127', 'GO:0030154', 'GO:0008285', 'GO:0016525']	7
Contig007268	['GO:0006281', 'GO:0031441', 'GO:0044818', 'GO:0001894', 'GO:0035825', 'GO:0085020', 'GO:0051865', 'GO:0045787', '', 'GO:0000209', 'GO:0071479', 'GO:0045786', 'GO:0043065', 'GO:0033554', '', 'GO:0042325', 'GO:0046826', 'GO:0006974', 'GO:0110025', 'GO:0006282', 'GO:0051726', 'GO:2000001', 'GO:0045732', 'GO:0043066', 'GO:0016567']	12
Contig008258	['GO:2000369', 'GO:0072583', 'GO:0035335', 'GO:0006470', 'GO:0016311', 'GO:0016191', 'GO:0072318', 'GO:0006897', 'GO:0006898', 'GO:0051649']	4
Contig010863	['GO:0022414', 'GO:0007186', 'GO:0010628', 'GO:0051781', 'GO:0008406', 'GO:0045860', 'GO:0042127', 'GO:0042060', 'GO:0008284', 'GO:0045766', 'GO:0030728', 'GO:0007267', 'GO:0008285', 'GO:0008283', 'GO:0050680', 'GO:0001819', 'GO:0046660', 'GO:0048661', 'GO:0007281', 'GO:0042327', 'GO:0045840', 'GO:0045089', 'GO:0030154', 'GO:0038134', 'GO:0009887', 'GO:0009653', 'GO:0030216', 'GO:0061098', 'GO:00…	20
Contig001098	['GO:0005978', 'GO:0006112', 'GO:0009056', 'GO:0044281', 'GO:0006096', 'GO:0006139', '', 'GO:0006094', 'GO:0006796', 'GO:0005975', 'GO:0006006']	7
Contig004243	['GO:0006412', 'GO:0002181', 'GO:0010467', 'GO:0000028', 'GO:0006364', 'GO:0042274']	4
Contig011125	['GO:0035359', 'GO:0048534', 'GO:0032526', 'GO:0048386', 'GO:0010888', 'GO:0048539', 'GO:0045944', 'GO:0060430', 'GO:0003007', 'GO:0006325', 'GO:0060348', 'GO:0009887', 'GO:0000902', 'GO:0048872', 'GO:0045599', '', 'GO:0030097', 'GO:0072015', 'GO:0006355', 'GO:0048538', 'GO:0006508', 'GO:0045595', 'GO:0035564']	8
Contig009903	['GO:0006508', 'GO:0006750', 'GO:1902883', 'GO:0006749', 'GO:0006751', 'GO:1901750']	3
Contig012033	['GO:0032968', 'GO:0043170', 'GO:0006357', 'GO:0008152', 'GO:0051123', 'GO:0060261', 'GO:0006355', 'GO:0035019', 'GO:0019827', 'GO:0006351', 'GO:0016567', 'GO:0006367', 'GO:0032502', 'GO:0010468']	11
Contig005813	['GO:0051315', 'GO:0007049', 'GO:0051225', 'GO:0090307', 'GO:0007094', 'GO:0071539', 'GO:0090222', 'GO:0070925', 'GO:0098534', 'GO:0051301', 'GO:0006999', 'GO:0050830', 'GO:0032008', 'GO:0070201', 'GO:0031503', 'GO:0032006', 'GO:0046599', 'GO:1904262', 'GO:0000278', 'GO:0007020', 'GO:0046605', 'GO:0007059', 'GO:0008104', 'GO:1904263', 'GO:0097435', 'GO:0051028', 'GO:0034198', 'GO:0009267', 'GO:00…	19
Contig011690	['GO:0120036', 'GO:0030030', 'GO:0070121', 'GO:0051602', 'GO:0048856', 'GO:0060071', 'GO:0032402', 'GO:0007275', 'GO:0048513', 'GO:0060271', 'GO:0045197', 'GO:1990403', 'GO:0031175', 'GO:0003407']	6
Contig014512	['GO:0035556', 'GO:0007049', 'GO:0018105', 'GO:0051301', 'GO:0006468', 'GO:0010975', 'GO:0042149', 'GO:0090176', 'GO:0048812', 'GO:0070059', 'GO:0000086', 'GO:0007409', 'GO:0006915', 'GO:2000807', 'GO:0030182', 'GO:1904152', 'GO:0061178', 'GO:0030010', 'GO:0051128', 'GO:0006887', 'GO:0007399', 'GO:0009267', 'GO:0030036', 'GO:0000226', 'GO:0050770', 'GO:0043462', 'GO:0036503', 'GO:0016310', 'GO:00…	16
Contig014679	['GO:0006357', 'GO:0045944', 'GO:0045892', 'GO:0006355', 'GO:0010468', 'GO:0000122']	5
Contig007472	['GO:0007186']	1
Contig005664	['GO:0002269', 'GO:0009617', 'GO:0070098', 'GO:0010628', 'GO:0007186', '', '', 'GO:0032496', 'GO:0042127', 'GO:0006955', 'GO:0045091', 'GO:0042060', 'GO:0048247', 'GO:0010186', 'GO:0006935', 'GO:0007267', 'GO:0008285', 'GO:0050930', 'GO:0002232', 'GO:0030595', 'GO:0050729', 'GO:0061844', 'GO:0070374', 'GO:0036446', 'GO:0060326', 'GO:0048147', 'GO:0042119', 'GO:0071222', 'GO:0030155', 'GO:0071347'…	18
Contig001056	['GO:0000462', 'GO:0006412', 'GO:0032474', 'GO:0006952', 'GO:0006457', 'GO:0000480', 'GO:0045087', 'GO:0051607', 'GO:0061371', 'GO:0060271', 'GO:0000472', 'GO:0002376', 'GO:0042026']	8
Contig015976	['GO:0061371', 'GO:0007018', 'GO:0060271', 'GO:0065003', 'GO:0036158']	3
Contig014626	[]	0
Contig007741	['GO:0045595']	0
Contig008217	['GO:1901698', 'GO:0007213', 'GO:0007186', 'GO:0050790', 'GO:0043547', 'GO:0009966', 'GO:0060159', 'GO:0099536', 'GO:0009968']	4
Contig008501	['GO:0019725', 'GO:0055085', 'GO:0006811', 'GO:0030001', 'GO:0006829', 'GO:0071577', '', 'GO:0098655', 'GO:0006882']	7
Contig013345	['GO:0032474']	0
Contig012930	['GO:0006511', 'GO:0051292', 'GO:0051028', 'GO:0006999', 'GO:0006508', 'GO:0006913', 'GO:0065003', 'GO:0015031']	6
Contig012813	['GO:0043170', 'GO:0007283', 'GO:0006281', 'GO:0022414', 'GO:0051321', 'GO:0043170', 'GO:0032392', 'GO:0048477', 'GO:0006139', 'GO:0000712', 'GO:0071840', 'GO:0030154', 'GO:0090304', 'GO:0032508', 'GO:0006401']	13
Contig015911	['GO:0010628', 'GO:0050790', 'GO:0032880', 'GO:0006111', 'GO:0006606', 'GO:0034587', 'GO:0008284', 'GO:0030031', 'GO:0007281', 'GO:0035626', 'GO:0051642', 'GO:0016925', 'GO:0046907', 'GO:0045176', 'GO:0006457', 'GO:0051292', 'GO:0046833', 'GO:1900182', 'GO:0008104', 'GO:0033133', 'GO:0001975', 'GO:0051028', 'GO:0006607', '', 'GO:0000413', 'GO:0006913', 'GO:0007419', 'GO:0015031', 'GO:0051168']	11
Contig000180	['GO:0097192', 'GO:0035556', 'GO:0042981', 'GO:0030217', 'GO:0043066', 'GO:0050852', 'GO:0002903', 'GO:0021987', 'GO:0006974', 'GO:0001783', 'GO:0043154', 'GO:0001782', 'GO:0008630', '', 'GO:0006915']	6
Contig009048	['GO:0030178', 'GO:0016055', 'GO:0060061']	2
Contig000350	['GO:0030837', 'GO:0051016', 'GO:0010591', 'GO:0042325', 'GO:0030042', 'GO:0010613', 'GO:0018108', 'GO:0007015', 'GO:0051493', '', 'GO:0032956', 'GO:0010976', 'GO:0042989']	6
Contig003760	['', 'GO:0006811']	1
Contig009118	['GO:0015012', 'GO:0030210', 'GO:0030166', 'GO:0015014', 'GO:0008152', 'GO:0005975']	4
Contig007881	['GO:1903955', 'GO:0035556', 'GO:0002685', 'GO:0007186', 'GO:0019222', 'GO:0050790', 'GO:0030036', 'GO:0007163', 'GO:0042592', 'GO:0008284', 'GO:0006935', 'GO:0032956', 'GO:0043304', 'GO:0030031', 'GO:0008283', 'GO:0060753', 'GO:0060341', 'GO:0000902', 'GO:0098609', 'GO:1990266', 'GO:0051049', 'GO:0006897', 'GO:0007015', 'GO:0060263', 'GO:0030865', 'GO:0071593', 'GO:0051493', 'GO:0030155', 'GO:00…	21
Contig006946	['GO:0018208']	0
Contig002890	['GO:0007264', 'GO:0006909', 'GO:0035556', 'GO:0002244', 'GO:0050790', 'GO:0016477', 'GO:0007520', 'GO:0010634', 'GO:1900026', 'GO:0022011', 'GO:0006915']	6
Contig015813	['GO:0051315', 'GO:0051301', 'GO:0007049', 'GO:0022414', 'GO:0051383', 'GO:0007059', 'GO:0007094', 'GO:0007080', 'GO:0000278', 'GO:0008608', 'GO:0007507', 'GO:0007052', 'GO:0045132']	8
Contig006078	['GO:0009888', 'GO:0000902', 'GO:0007155', 'GO:0045087', 'GO:0110020', 'GO:0040014', 'GO:0016477', 'GO:0034446', 'GO:0021549', 'GO:0048856', 'GO:0006979', 'GO:0031589', 'GO:0043473', 'GO:0042552', 'GO:0002376', 'GO:0009887', 'GO:0007399', 'GO:0006954']	12
Contig005228	['GO:1901842', 'GO:0006955', 'GO:0051276', 'GO:0000278', 'GO:0007166', 'GO:0051310']	4
Contig006629	['GO:0007283', 'GO:0006281', 'GO:0035556', 'GO:0051321', 'GO:0007286', 'GO:0022414', 'GO:0007094', 'GO:0070192', 'GO:0007281', 'GO:0048477', 'GO:0030154', 'GO:0045786', 'GO:0051598', 'GO:0008152', 'GO:0006302', 'GO:0007141', 'GO:0000278', 'GO:0000280', 'GO:0007130', 'GO:0010564', 'GO:0045132', 'GO:0007131', 'GO:0006366', 'GO:0051447', 'GO:0001556', 'GO:0007144', 'GO:0045839']	16
Contig000947	['GO:0035556', 'GO:0000302', 'GO:0007049', 'GO:0031122', 'GO:0045930', 'GO:0000082', 'GO:2000134', 'GO:2000045', 'GO:0090316', 'GO:0048167', 'GO:0007030', 'GO:0000122', 'GO:0006468', 'GO:0009314', 'GO:0090166', 'GO:0000086', 'GO:0045786', 'GO:0051302', 'GO:0006915', 'GO:0043491', 'GO:0006974', 'GO:2000777', 'GO:1904716', 'GO:0032465', 'GO:0000278', 'GO:0051726', 'GO:0000165', 'GO:0044819', 'GO:00…	16
Contig009839	['GO:0001666', 'GO:0071333', 'GO:0050667', 'GO:0022900', 'GO:0061097', 'GO:0042127', 'GO:0051496', 'GO:0003015', 'GO:0008285', '', 'GO:2000379', 'GO:0001934', 'GO:0071560', 'GO:0051897', 'GO:0055007', 'GO:0072593', 'GO:0070374', 'GO:0010729', 'GO:0000902', 'GO:0043065', 'GO:0061098', 'GO:0006952', 'GO:2000573', 'GO:0043406', 'GO:0045453', 'GO:0006801', 'GO:0014911', 'GO:0071320', 'GO:0042554', 'G…	14
Contig010869	['GO:0019953', 'GO:0042448', 'GO:0009267', 'GO:0043066', 'GO:0051180', 'GO:0001895', 'GO:0050821', 'GO:0043069', 'GO:0071693', 'GO:0051659', 'GO:0098869', 'GO:0046010', 'GO:0001542', 'GO:0015031', 'GO:0060395']	6
Contig003546	['GO:0006357', 'GO:0009410', 'GO:0030154', 'GO:0006355', 'GO:0048731', 'GO:0009653']	6
Contig000455	['GO:0001654', 'GO:0001503', 'GO:0030509', 'GO:0030514', 'GO:0001709', 'GO:0000578', 'GO:0048167', 'GO:0060074', 'GO:0098976', 'GO:0030154', 'GO:0030182', 'GO:0097113', 'GO:0007399']	6
Contig012648	['GO:0036269', 'GO:0006730', 'GO:0007420']	2
Contig013239	[]	0
Contig004294	['GO:0006886', 'GO:0003281', 'GO:0060976', 'GO:0072583', 'GO:0099590', 'GO:0048488', 'GO:0035904', 'GO:0045807', 'GO:0016192', 'GO:0001822', 'GO:0007507', 'GO:0006897', 'GO:0098884', 'GO:0048268', 'GO:0003279', 'GO:1905477', '', 'GO:0015031']	7
Contig008210	['GO:0008152', 'GO:0006357', 'GO:0043170', 'GO:0044238', 'GO:0006355', 'GO:0010468']	5
Contig007588	['GO:0035556', 'GO:0099173', 'GO:0009966', 'GO:0016310', 'GO:0050808']	3
Contig005909	['GO:0045892', 'GO:0051260', 'GO:0051259']	3
Contig002139	['GO:0006486', 'GO:0016267', 'GO:0006493', 'GO:0036344', 'GO:0016266', 'GO:0030168']	3
Contig010203	['GO:0043113', 'GO:0042130', 'GO:0010628', 'GO:0042098', 'GO:0032880', 'GO:0030838', 'GO:2000134', 'GO:0001935', 'GO:1903760', 'GO:1990416', 'GO:0007163', 'GO:0008284', 'GO:0001657', 'GO:0048729', 'GO:0008283', 'GO:0030041', 'GO:0048704', 'GO:0050680', 'GO:0000122', 'GO:0001771', 'GO:0070373', 'GO:0046710', 'GO:0046037', 'GO:0098609', 'GO:0099645', 'GO:0099562', 'GO:0007015', 'GO:0031641', 'GO:19…	18
Contig012305	['GO:0045765', 'GO:0032880', 'GO:0051046', 'GO:0018992']	1
Contig015167	[]	0
Contig002589	['GO:0006805', 'GO:0006082', 'GO:0009410', 'GO:0019373']	1
Contig005807	['GO:0106005', 'GO:0010467', 'GO:0032259', 'GO:0006397', 'GO:0006370', 'GO:1990830']	5
Contig001742	[]	0
Contig005403	['GO:0071559']	0
Contig013890	['GO:0032008', 'GO:0007264', 'GO:0043200', '', 'GO:0034198', 'GO:0009267', 'GO:0032006', 'GO:0008380', 'GO:0010506', 'GO:0071230', 'GO:0006351', 'GO:0008104', 'GO:1903432', 'GO:0006915']	9
Contig007535	['GO:0050790']	0
Contig009659	['GO:0001934', 'GO:0051223', 'GO:0071456', 'GO:0010666']	1
Contig006085	['GO:0035025', 'GO:0055085', 'GO:0032501', 'GO:0016055', 'GO:0040011', 'GO:0042060', 'GO:0006606', 'GO:2001223', 'GO:0001889', 'GO:0016485', 'GO:0071560', 'GO:0007229', 'GO:0009792', 'GO:0009987', 'GO:0009314', 'GO:0050777', 'GO:0048699', 'GO:0007275', 'GO:0007166', 'GO:0030199', 'GO:0009653', 'GO:0006518', 'GO:0007160', 'GO:0006491', 'GO:0007005', 'GO:0060828', 'GO:0090263', 'GO:0010977', 'GO:00…	22
Contig005893	['GO:0099022', 'GO:0044248', 'GO:0048208', 'GO:0048193', '', '', 'GO:0070727', 'GO:0000045', 'GO:0016192', 'GO:0044237', 'GO:0006888', 'GO:0007030', 'GO:0051641', 'GO:0009448', 'GO:0008104', 'GO:0034497']	7
Contig007227	[]	0
Contig003919	['GO:0045333', 'GO:0043536', 'GO:0043535', 'GO:0046034', 'GO:0042127', 'GO:0008285', 'GO:0050680', '', 'GO:0010594', 'GO:0006754', 'GO:0042776', 'GO:0046907', 'GO:0045471', 'GO:0006915', 'GO:0006811', 'GO:1902600', 'GO:0006629', 'GO:0030335', 'GO:0071549', 'GO:0015986', 'GO:0014850', 'GO:0001937', 'GO:0071732', 'GO:0042742']	14
Contig012866	['GO:0006886', 'GO:0070863', 'GO:0003400', 'GO:0061024', 'GO:0032880', 'GO:0016192', 'GO:0016050', 'GO:0006888', 'GO:0015031']	5
Contig004623	['GO:0051301', 'GO:0007049', 'GO:0006468', 'GO:0046777', 'GO:0006974', 'GO:0032880', 'GO:0090166', 'GO:0018105', 'GO:0120187', 'GO:0016310', '']	3
Contig002106	['GO:0035092', 'GO:0035556', 'GO:0016310', 'GO:0006468', 'GO:0010467', 'GO:0045070', 'GO:0045087', 'GO:0006397', 'GO:0008380', 'GO:0045071', 'GO:0030154', 'GO:0048024', 'GO:0050684', 'GO:0065003', 'GO:0007059', 'GO:0000245']	9
Contig010369	['GO:0098693', 'GO:0045055', 'GO:0007268', 'GO:0061077', 'GO:0051402', 'GO:0016079', 'GO:0043524', 'GO:0006887']	5
Contig001465	['GO:0010628', 'GO:0021537', 'GO:0032880', 'GO:0090557', 'GO:1902414', 'GO:1903861', 'GO:0046931', 'GO:2000049', 'GO:0048854', 'GO:0048856', 'GO:0030154', 'GO:0070830', 'GO:0034334', 'GO:0048872', 'GO:0007155', 'GO:0022409', 'GO:0043547', 'GO:0061003', 'GO:0060563', 'GO:0050775', 'GO:0044331', 'GO:0060019', 'GO:0061951', 'GO:0021987', 'GO:0030336', 'GO:0061885', 'GO:0140059', 'GO:0070445']	7
Contig012555	['GO:0006690', 'GO:0070542', 'GO:0006633', 'GO:0006693', 'GO:0006629', 'GO:0001516', 'GO:0045907', 'GO:0045471', 'GO:0030644', 'GO:0006631']	6
Contig009092	['GO:0043374', 'GO:0045944', 'GO:0023052', 'GO:0006955', 'GO:0042129', 'GO:0050830', 'GO:0007267', 'GO:0036037']	5
Contig008183	['GO:0007049', 'GO:0051726', 'GO:0045595', 'GO:0071300', 'GO:0045786', 'GO:0045930', 'GO:0045666', 'GO:0007399']	7
Contig001089	['GO:0030837', 'GO:0032956', 'GO:0051493', 'GO:0051497']	2
Contig008974	['GO:0045639', 'GO:0007286', 'GO:0061136', 'GO:0007341', 'GO:0045654', 'GO:0045595', 'GO:0051094', 'GO:0005975', 'GO:0045893', 'GO:0061956']	5
Contig000531	[]	0
Contig001232	['GO:0018023', 'GO:0032259', 'GO:0006479', 'GO:0018022']	1
Contig014697	['GO:0046777', 'GO:0010628', 'GO:0050790', 'GO:0055003', 'GO:0051592', 'GO:0035995', 'GO:0006468', 'GO:0060048', 'GO:0030154', 'GO:0050714', 'GO:0045214', 'GO:0007155', 'GO:0045859', 'GO:0051898', 'GO:0050808', 'GO:0048769', 'GO:0030240', 'GO:0010737', 'GO:0055008', 'GO:0003300', 'GO:0030241', 'GO:0016310']	6
Contig015075	['GO:0009058', 'GO:0006412', 'GO:0010467', 'GO:0008152', 'GO:0071951', 'GO:0006413', '', 'GO:0008152']	5
Contig008069	['GO:0034776', 'GO:0034765', 'GO:0002250', 'GO:0030217', 'GO:0051928', 'GO:0006811', 'GO:0043410', 'GO:0045063', 'GO:0002286', 'GO:0051924', 'GO:0032237', 'GO:0035710', 'GO:0016197', 'GO:0002376', 'GO:0046330', 'GO:0002115', 'GO:0006816']	9
Contig007225	['GO:0007049', 'GO:0035970', 'GO:0006470', 'GO:0007417', 'GO:0051726']	2
Contig005252	['GO:0017148', 'GO:0009058', 'GO:0070314', 'GO:0008152', '', 'GO:1902074', 'GO:0030324', 'GO:0019752', 'GO:0010629', 'GO:0061157', 'GO:0006629', '', 'GO:0033993', 'GO:0001822', 'GO:0006402', 'GO:0006082', 'GO:0050680', 'GO:0007420']	11
Contig009830	['GO:0006357', 'GO:0010468', 'GO:0006325', 'GO:0045944']	4
Contig001897	['', 'GO:0044341', 'GO:0035725', 'GO:0006470', 'GO:0006351']	3
Contig008635	['GO:0014013', 'GO:0016043', 'GO:0030833', 'GO:0016055', 'GO:0030036', 'GO:0007368', 'GO:0032956', 'GO:0048715', '', 'GO:0051493', 'GO:2000050', 'GO:0060828', 'GO:0090263', 'GO:0030335', 'GO:0051489', 'GO:0007010', 'GO:0045685', 'GO:0021516', 'GO:0022008', 'GO:0050768', 'GO:0090521', 'GO:0045595', 'GO:0030111']	10
Contig004399	['', 'GO:0045329', 'GO:0051354', 'GO:0044237']	1
Contig008117	['GO:0030195', 'GO:0050766', 'GO:0048468', 'GO:0050896', 'GO:0006508', 'GO:0007599', 'GO:0042730', 'GO:0010951', 'GO:0007596', 'GO:0035807', 'GO:0050819', 'GO:0044469', 'GO:0048513', 'GO:0048731']	9
Contig009789	['GO:0070613', 'GO:0001947', 'GO:0030030', 'GO:0010839', 'GO:0007224', 'GO:0042073', 'GO:0001841', 'GO:0007368', 'GO:1905515', 'GO:0043616', 'GO:0035720', 'GO:0060271', 'GO:0009953', 'GO:0042733', 'GO:0050680']	6
Contig005604	['GO:0015012', 'GO:0015015', 'GO:0030166', 'GO:0046596', 'GO:0006477', 'GO:0050819', 'GO:0051923']	3
Contig006915	['GO:0047484', 'GO:0046034', 'GO:0009651']	1
Contig014887	['GO:0007155', 'GO:0010467', 'GO:0006508', 'GO:0098609', 'GO:0006915']	5
Contig013925	['GO:0014070', '', 'GO:0006508', 'GO:0043161', 'GO:0051603', 'GO:0010498']	5
Contig004084	[]	0
Contig000644	[]	0
Contig009068	['GO:0030166', 'GO:0044085', 'GO:0006024', 'GO:0006486', 'GO:0000271', 'GO:0008542', 'GO:0050650', 'GO:0071456', 'GO:0005975', 'GO:0098734']	4
Contig014341	['GO:0034765', 'GO:0006811', 'GO:0071805', 'GO:0006813', 'GO:0030322']	4
Contig015297	['GO:0022414', 'GO:0061038', 'GO:0060173', 'GO:0042060', 'GO:0008284', 'GO:1904891', 'GO:0002062', 'GO:0045944', 'GO:0060066', 'GO:0030900', 'GO:0062009', 'GO:0009953', 'GO:0048705', 'GO:0035115', 'GO:0009966', 'GO:0060065', 'GO:0099054', '', 'GO:0016477', 'GO:0014834', 'GO:0048513', 'GO:0021707', 'GO:0044319', 'GO:0048731', 'GO:0050678', 'GO:0051965', 'GO:0031133', 'GO:0043589', 'GO:0009798', 'G…	28
Contig010849	['GO:0006281']	1
Contig004008	['GO:0010389', 'GO:2000045', 'GO:0034446', 'GO:0007018', 'GO:0008284', 'GO:0032487', 'GO:0021575', 'GO:0043524', 'GO:0008283', 'GO:0033624', 'GO:0032467', 'GO:0043549', 'GO:0051301', 'GO:0001934', 'GO:0001558', 'GO:1903429', 'GO:0043523', 'GO:0031641', 'GO:0030900', 'GO:0045184', 'GO:0030155', 'GO:0021693', 'GO:0021766', 'GO:0032147', 'GO:0043161', 'GO:0021772', 'GO:0051726', 'GO:0021846', 'GO:00…	13
Contig013715	['GO:0008360', 'GO:0051642', 'GO:0051684', 'GO:0030334', 'GO:0051641', 'GO:0061842', 'GO:0051661']	3
Contig013570	['GO:0050790', 'GO:0006508', 'GO:0010629', 'GO:0006629', 'GO:0045859', 'GO:0001932', 'GO:0000184', 'GO:0043549']	4
Contig001070	['GO:0006956', 'GO:0045087', 'GO:0050778', 'GO:0006955', 'GO:0048856', 'GO:0006958', 'GO:0019835', 'GO:0002253', 'GO:0002376', 'GO:0006957']	6
Contig011750	['GO:0045041', 'GO:0046825', 'GO:0034599', 'GO:0072655', 'GO:0033108', 'GO:1990830', 'GO:0015914', 'GO:0018171', 'GO:0022417', 'GO:0007005', 'GO:0006457', 'GO:0008104', 'GO:0034204', 'GO:0010467', 'GO:0043504', 'GO:0051084', 'GO:1901857', 'GO:0065003', 'GO:0015031']	7
Contig012160	['GO:0051301', 'GO:0007049', 'GO:0061640', 'GO:0035542', 'GO:0031647', 'GO:0008104', 'GO:0033157']	2
Contig012779	['GO:2000042', 'GO:2001034', 'GO:0006281', 'GO:0010628', 'GO:0002821', 'GO:2001032', 'GO:0006750', 'GO:0043247', 'GO:0006935', 'GO:0045830', 'GO:0071474', 'GO:0003009', 'GO:0046686', 'GO:0002208', 'GO:0006974', 'GO:0009307', 'GO:0009636', '']	8
Contig000879	['GO:0010467', 'GO:0032259', 'GO:0006397', 'GO:0008380', 'GO:0000398']	5
Contig001397	['GO:0030154']	1
Contig011334	['GO:0006048', 'GO:0008152']	2
Contig009362	[]	0
Contig008282	[]	0
Contig014904	['GO:0001666', '', 'GO:0001654', 'GO:0000082', 'GO:0071636', 'GO:2000491', 'GO:0006338', 'GO:0071354', 'GO:0045624', 'GO:1902895', 'GO:0070301', 'GO:0043009', 'GO:0010468', 'GO:0006816', 'GO:0000122', 'GO:0043525', 'GO:0030218', 'GO:0035701', 'GO:0045944', 'GO:0071300', 'GO:1990830', 'GO:0048566', 'GO:0060216', 'GO:0060271', 'GO:0045637', 'GO:0045658', '', 'GO:0030099', 'GO:0045893', 'GO:0060252'…	17
Contig000112	[]	0
Contig007557	['GO:0001666', 'GO:0051781', 'GO:0042127', 'GO:0008284', 'GO:0045766', 'GO:0050930', 'GO:0008015', 'GO:0001934', 'GO:0001945', 'GO:0030154', 'GO:0071363', 'GO:0048010', 'GO:0048514', 'GO:0030947', 'GO:0050918', 'GO:0001525', 'GO:0001568', 'GO:0030335', 'GO:0060754', 'GO:0038084', 'GO:0001938', 'GO:0071542', 'GO:0001946', 'GO:0032755', 'GO:0002040', 'GO:0009617', 'GO:0048144']	11
Contig006918	['GO:0006508']	1
Contig001280	['GO:0014070', 'GO:0098656', 'GO:0055085', 'GO:0006865', 'GO:1900407', 'GO:0042127', 'GO:0034599', 'GO:0021591', 'GO:0021756', 'GO:0015813', 'GO:0060173', 'GO:0006749', 'GO:1901494', '', 'GO:0051775', 'GO:0030534', 'GO:0034775', '', 'GO:0070306', 'GO:0050807', 'GO:0006979', 'GO:0008542', 'GO:0090461', 'GO:1902475', 'GO:0048021', 'GO:0050804', 'GO:0098712', 'GO:0071705', 'GO:0051223', 'GO:0015807'…	10
Contig010741	['', 'GO:0006166', 'GO:0005975', 'GO:0006006', 'GO:0008152']	4
Contig006250	['GO:1990264', 'GO:0035335', 'GO:0001822', 'GO:0007417', 'GO:0006469', 'GO:0090260', 'GO:0032835', 'GO:0043549', 'GO:0009888', 'GO:0030595', 'GO:0050807', 'GO:0072112', 'GO:0072006', 'GO:0040036', 'GO:0016311', 'GO:0060326', 'GO:0010812', 'GO:0000902', 'GO:0021587', 'GO:0007411', 'GO:0003105', 'GO:0001933', 'GO:0090090', 'GO:0010977', 'GO:0030182', 'GO:0051128', 'GO:0007399', 'GO:0003093', 'GO:00…	10
Contig001074	['GO:0060675', 'GO:0010633', 'GO:0007601', 'GO:0042127', 'GO:0008284', 'GO:2000648', 'GO:0001657', 'GO:2000147', 'GO:0001889', 'GO:2000027', 'GO:0098742', 'GO:0045944', 'GO:1900028', 'GO:0098609', 'GO:2000048', 'GO:0010812', 'GO:0051493', 'GO:0007155', 'GO:0048920', 'GO:0048863', 'GO:0032502', 'GO:0051497', 'GO:0050896', 'GO:0043066', 'GO:0045595', 'GO:0030336', 'GO:0090191', 'GO:1900025', 'GO:00…	11
Contig015011	['GO:0036211', 'GO:0018095', 'GO:0000226']	2
Contig008200	[]	0
Contig002744	['GO:0031398', 'GO:0030097', 'GO:0038160']	1
Contig002679	['GO:0045333', 'GO:0007585', 'GO:1902600', 'GO:0006123', 'GO:0008535', 'GO:0065003', 'GO:0006784', 'GO:0006783', 'GO:0042168']	8
Contig014039	[]	0
Contig003425	['GO:0008285', 'GO:0042113', 'GO:0016310']	3
Contig001624	['GO:0060416', 'GO:0071320', 'GO:0045429', 'GO:0071418', 'GO:0000053', 'GO:0071549', 'GO:1903038', 'GO:0001889', 'GO:0014075', 'GO:0000052', 'GO:0071499', 'GO:0032496', 'GO:0071356', 'GO:0010046', 'GO:0022408', 'GO:0000050', 'GO:0010043', 'GO:0007623', 'GO:0001822', 'GO:0071230', 'GO:0007584', 'GO:0009410', 'GO:0071400', 'GO:0051384', 'GO:0009636', 'GO:0071377', '', 'GO:0032355', 'GO:0070542', 'G…	11
Contig001436	[]	0
Contig007044	['GO:0006082', 'GO:0019752', 'GO:0042219', 'GO:0015939', 'GO:0043603', 'GO:0006751', '', 'GO:0006164', 'GO:0009150', 'GO:0015937', 'GO:0044248', 'GO:0046395', 'GO:0008152', 'GO:0044281']	6
Contig013043	['GO:0098656', 'GO:0006811', 'GO:0006821', 'GO:0055085', 'GO:0006884', 'GO:0009612', 'GO:0015698', 'GO:1902476']	7
Contig000266	['GO:0045944', 'GO:0045892', 'GO:0000122', 'GO:1903243', 'GO:0010614']	3
Contig000504	[]	0
Contig011959	['GO:0007369', 'GO:0090266', 'GO:0009888', 'GO:0043065', 'GO:0051447', 'GO:1901701', 'GO:0045786', 'GO:0007162', 'GO:0035335', 'GO:0016311', 'GO:0070373', 'GO:0008285', 'GO:0007088', 'GO:0090027', 'GO:0043066', 'GO:2000279', 'GO:0097305', 'GO:0009966', 'GO:0009968', 'GO:0035970', 'GO:0051726', 'GO:0043409', 'GO:1900744', 'GO:0007049', 'GO:0001706', 'GO:1990869', 'GO:0051321', 'GO:0006470', 'GO:00…	12
Contig008929	['GO:0006996', 'GO:0019408', 'GO:0006629', 'GO:1901615', 'GO:0061024', 'GO:0006486', 'GO:0006066', 'GO:0008299', 'GO:0016094', 'GO:0006489', 'GO:0009409']	8
Contig012408	['GO:0006412', 'GO:0010467']	1
Contig005962	['GO:0090150', 'GO:0006887', 'GO:0016192', 'GO:0070121', 'GO:0046907', 'GO:0035418', 'GO:0000278', 'GO:0032456', 'GO:0051641', 'GO:0031175', 'GO:0001525', 'GO:0001944', 'GO:0072659', 'GO:0032402', 'GO:0008104', 'GO:0035556']	10
Contig015063	['GO:0010842', 'GO:0048856', 'GO:0034109', 'GO:0060042', 'GO:0007155', 'GO:0098609']	3
Contig012935	['GO:0007015', 'GO:0007420', 'GO:0021591', 'GO:0051764', 'GO:0000226', 'GO:0021923', 'GO:0009617', 'GO:0030036']	3
Contig006367	['GO:0003341', 'GO:0007018', 'GO:0060285', 'GO:0036158', 'GO:0044085']	2
Contig009688	['GO:0045944', 'GO:0045892', 'GO:0006355', 'GO:0000122', 'GO:0006357', 'GO:0042060', 'GO:0048856', 'GO:0001525', 'GO:0030154']	7
Contig002549	['GO:0016485', 'GO:0035821', 'GO:0031638', 'GO:0001868', 'GO:0010185', 'GO:0006508', 'GO:0010467', 'GO:0006897']	5
Contig015423	[]	0
Contig009512	['GO:0034728', 'GO:0006334', 'GO:0045682', 'GO:0045892', 'GO:0016479', 'GO:0071169', 'GO:0045618', 'GO:1901837', 'GO:0051641', 'GO:0007420', 'GO:0010468', 'GO:0007549', 'GO:1901836', 'GO:0045684', 'GO:0008104', 'GO:0006325', 'GO:0000122', 'GO:0045814', 'GO:0045595', 'GO:0065003', 'GO:0010629']	10
Contig015789	[]	0
Contig014534	['GO:0006811', 'GO:0055085', 'GO:1902600', 'GO:0051179', 'GO:0042908', 'GO:1990961', 'GO:0015695']	5
Contig004352	['GO:0000398', 'GO:0008380', 'GO:0000278', 'GO:0007094', 'GO:0045786', 'GO:0006397', 'GO:0035556', 'GO:0034501', 'GO:0010467']	9
Contig006385	['GO:0002028', 'GO:0015711', 'GO:0106074', 'GO:0009058', 'GO:2000651', 'GO:0090263', 'GO:0006338', 'GO:0010766', 'GO:0070588', 'GO:0008152', '', 'GO:0006874', 'GO:2000649', 'GO:0055085', 'GO:1902600', 'GO:1903288', 'GO:0070373', 'GO:0046777', 'GO:0047484', 'GO:0070509', 'GO:0008285', 'GO:0080135', 'GO:0043039', 'GO:0006812', 'GO:0006520', 'GO:0006885', 'GO:0044249', 'GO:0006468', 'GO:0006399', 'G…	28
Contig009135	['GO:0007369', 'GO:0016043', 'GO:0007186', 'GO:0042074', 'GO:0008277', 'GO:0007193', 'GO:0051179', 'GO:0070586', 'GO:0050790', 'GO:0048856', 'GO:0001944', 'GO:0001701', 'GO:0008542', 'GO:0007275', 'GO:0009416', 'GO:0071711']	7
Contig015669	['GO:0010460', 'GO:0007218', 'GO:0042053', 'GO:0007186', 'GO:0006937', 'GO:0007217', 'GO:0042538', 'GO:0043278', 'GO:0006936', 'GO:0070474', 'GO:0042220', '', 'GO:1902093', 'GO:0070472', 'GO:1901317', 'GO:0032355', 'GO:0060259', 'GO:0045777']	4
Contig003443	['GO:0042273', 'GO:0070130', 'GO:0090071', 'GO:0017148', 'GO:0042254']	3
Contig000549	['GO:0050878', 'GO:0048468', 'GO:0048856', 'GO:0048513', 'GO:0006508', 'GO:0048731']	4
Contig012350	['GO:0055085', 'GO:0051640', 'GO:0051455', 'GO:0051315', 'GO:0051301', 'GO:0051382', 'GO:0000070', 'GO:0007049']	4
Contig007409	['GO:0043588', 'GO:0002244', 'GO:0030334', 'GO:0009888', 'GO:0043473', 'GO:0007010', 'GO:0045109', 'GO:0045104', 'GO:0031069', 'GO:0045103', 'GO:0031424', 'GO:0048733', 'GO:0032880', 'GO:0045107', 'GO:0009612', 'GO:0008544']	5
Contig004133	['GO:0006829', 'GO:0019725', 'GO:0034220', 'GO:0006811', 'GO:0050861', 'GO:0055085', 'GO:0002903', 'GO:0050776', '', 'GO:0030001', 'GO:0006882', 'GO:0009966', 'GO:0071577', 'GO:0071578', '', 'GO:0030890']	10
Contig001297	['GO:0006364', 'GO:0001775', 'GO:0035723', 'GO:1904100', 'GO:0060255', 'GO:0042273', 'GO:0009893', 'GO:0050766', 'GO:0032825', 'GO:0070475', 'GO:0008284', 'GO:0009228', 'GO:0006955', 'GO:0030225', 'GO:0008299', 'GO:0001819', 'GO:0007267', 'GO:0001525', 'GO:0120163', 'GO:0001866', 'GO:0019288', 'GO:0052865', 'GO:0048662', 'GO:0046148', 'GO:0045062', 'GO:0001787', 'GO:0032819', 'GO:0032259', 'GO:00…	22
Contig001651	[]	0
Contig009584	['GO:0043161', 'GO:1901698', 'GO:0071218', 'GO:0061077', '', 'GO:0034976', 'GO:0006508', 'GO:0051085', 'GO:0036503']	6
Contig008436	['GO:0007178', 'GO:0006470', 'GO:0035970', 'GO:0043124', 'GO:0000165', 'GO:0090263']	3
Contig004948	['GO:0008654', 'GO:0006629', 'GO:0016024']	3
Contig005795	['GO:0045944', 'GO:0045892', 'GO:0010468', 'GO:1904791', 'GO:0000723', 'GO:0006338', 'GO:0070200']	5
Contig004533	[]	0
Contig012654	['GO:0006508']	1
Contig003701	['GO:0016310', 'GO:0046339', 'GO:0006629', 'GO:0046834', 'GO:0007186', 'GO:0007200', 'GO:0046486', 'GO:0006654', 'GO:0046473', 'GO:0030168', 'GO:0035556', 'GO:0043086']	7
Contig010346	['GO:0019222', 'GO:0043123', 'GO:0006611', 'GO:0006470', 'GO:0045893', 'GO:0016311', 'GO:1901223', 'GO:0019222', 'GO:0080135', 'GO:0006499', 'GO:0035970', 'GO:0043124', 'GO:0046827', '', 'GO:0090263', 'GO:0030512', 'GO:0030514', 'GO:0071560']	6
Contig012586	['GO:0000492', 'GO:0065003']	2
Contig002853	['GO:0031638', 'GO:0046940', 'GO:0007565', 'GO:0032023', 'GO:0051301', 'GO:0006233', 'GO:0015031', 'GO:0006898', 'GO:0030154', 'GO:0007155', 'GO:0043152', 'GO:0061844', 'GO:0050830', 'GO:0045087', 'GO:0030855', 'GO:0007049', 'GO:0006897', 'GO:0009755', 'GO:0050829', 'GO:0006952', 'GO:0051607', 'GO:0042494']	10
Contig012687	['', 'GO:0042742', 'GO:0051301', 'GO:0060474', 'GO:0019933', 'GO:0051873', 'GO:0031640', 'GO:0009252', 'GO:0009607', 'GO:0008360', 'GO:0061844', 'GO:0050830', 'GO:0060326', 'GO:0002227', 'GO:0050832', 'GO:0015836', '', 'GO:0050829', 'GO:0006952', 'GO:0050918']	7
Contig014865	['GO:0006004', 'GO:0016139', 'GO:0009617', 'GO:2000535', 'GO:0008152', 'GO:0005975']	3
Contig014965	['GO:0006364', 'GO:0030490', 'GO:0000375', 'GO:0008380', 'GO:0055123', 'GO:0006396', 'GO:0010467', 'GO:0042274', 'GO:0042254']	7
Contig005370	['GO:0031109', 'GO:0007020', 'GO:0031122', 'GO:0007112', 'GO:0051225', 'GO:0006355', 'GO:0000278', 'GO:0000226', 'GO:0097435', 'GO:0022414', 'GO:0007058', 'GO:0045450', 'GO:0051321', 'GO:0065003']	7
Contig003203	['GO:0006511', 'GO:0051603', 'GO:0006914', 'GO:0045087', 'GO:0016567', 'GO:0002376', 'GO:0006508', 'GO:0051607']	7
Contig007702	['GO:0016579', 'GO:0006508', 'GO:0071108']	1
Contig007286	['GO:0051028', 'GO:0044085', 'GO:0006413', 'GO:0006935', 'GO:0010467', 'GO:0015031', 'GO:0045893', 'GO:0016070', 'GO:0008104', 'GO:0007155', 'GO:0010207', 'GO:0001822', 'GO:0048246', 'GO:0006406', 'GO:0046907', 'GO:0006913', 'GO:0072006', 'GO:0030032', 'GO:0006355', 'GO:0016567', 'GO:0009306', 'GO:0006606', 'GO:0019221']	17
Contig014996	['GO:1901224', 'GO:2000628', 'GO:0006511', 'GO:0032543', 'GO:0070131', 'GO:0042127', 'GO:1902775', 'GO:0071347', 'GO:0050856', 'GO:0000956', 'GO:0006508', 'GO:0010467', 'GO:0000963', 'GO:0010608', 'GO:0022408', 'GO:0030193', 'GO:0010468', 'GO:0046007', 'GO:0070555', 'GO:1900151', 'GO:0043488', 'GO:0045623', 'GO:0050863', 'GO:0061158', 'GO:0010951', 'GO:0008285', 'GO:0000288', 'GO:0050852', 'GO:00…	22
Contig011391	['GO:0016485', 'GO:0045893', 'GO:0051604', 'GO:0050829', 'GO:0006508', 'GO:0007283', 'GO:0010467']	6
Contig014994	['GO:0000077', 'GO:0051259', 'GO:2000779', 'GO:0006281', 'GO:0051091', 'GO:0045830', 'GO:2000042', 'GO:0050776', 'GO:0045893', 'GO:0010468', 'GO:0002639', 'GO:0006303', 'GO:0071481', 'GO:0010628', 'GO:0051260', 'GO:0002821', 'GO:0006351', 'GO:0006974', 'GO:0045944', 'GO:0006355']	14
Contig001420	['GO:0006486', 'GO:0018243', 'GO:0006493', 'GO:0016266']	2
Contig006601	['GO:0060324', 'GO:0001525', 'GO:0048704', 'GO:0030878', 'GO:0048705', 'GO:0002244', 'GO:0000122', 'GO:0021546', 'GO:0051216', 'GO:0021615', 'GO:0048562', 'GO:0001501', 'GO:0048706', 'GO:0045944', 'GO:0060216', 'GO:0048568', 'GO:0006355', 'GO:0006357', 'GO:0043009', 'GO:0003002', 'GO:0009952', 'GO:0048598', 'GO:0050767']	9
Contig010042	['GO:0000077', 'GO:0032200', 'GO:0045944', 'GO:2000677', 'GO:0045893', 'GO:0046425', 'GO:0008284', 'GO:0051726', 'GO:0010467', 'GO:0006281', '', '', 'GO:0010629', 'GO:0032259', 'GO:0006325', 'GO:0031507']	11
Contig002565	['GO:0006805', 'GO:0006082', 'GO:0019373', 'GO:0042573', 'GO:0019369', 'GO:0043651', 'GO:0006629', 'GO:0042572', 'GO:0002933', 'GO:0008202', 'GO:0008210', 'GO:0042178', 'GO:0046456', 'GO:0070989', 'GO:1901170', 'GO:0009636', 'GO:0018979', '', 'GO:0098542']	4
Contig007129	['GO:0016192', 'GO:0032456', 'GO:0032465', 'GO:0051726', 'GO:0070164', 'GO:0061512', 'GO:0007049', 'GO:0051301']	5
Contig006285	['GO:0005978', 'GO:0006112', 'GO:0005977', 'GO:0008152', 'GO:0009749', 'GO:0006091', 'GO:0005975']	5
Contig003390	['GO:0006355', 'GO:0006357', 'GO:0045944', 'GO:0001701', 'GO:0001889', 'GO:0002244', 'GO:0007507', 'GO:0038066', 'GO:0097284', 'GO:0000122']	7
Contig001667	['GO:0007005', 'GO:0007275', 'GO:0065003', 'GO:0021522', 'GO:0022900', 'GO:0048568', 'GO:1902600', 'GO:0033617', 'GO:0006091', 'GO:0048856', 'GO:0008535', 'GO:0009060', 'GO:0006897', 'GO:0007030', 'GO:0010638', 'GO:0032368', 'GO:0042953', 'GO:0055088']	9
Contig008932	['GO:0043161', 'GO:0006508', 'GO:0006511']	3
Contig000485	['GO:0042742', 'GO:0045089', 'GO:0007605', 'GO:0008360', 'GO:0009617']	3
Contig015826	['GO:0006805', 'GO:0042412', 'GO:0006629', 'GO:0042445']	2
Contig013810	['GO:0001568', 'GO:0003007', 'GO:0007155', 'GO:0016477', 'GO:0030198', 'GO:0030199', 'GO:0032964', 'GO:0035313', 'GO:0035989', 'GO:0043588', 'GO:0045112', 'GO:0048592', 'GO:0051128', 'GO:0097435', 'GO:1903225', 'GO:0035821']	7
Contig000847	['GO:0009072', 'GO:0006572', 'GO:0006559', 'GO:0006520', 'GO:0008152', '']	4
Contig014979	['GO:0003094', 'GO:0007015', 'GO:0030050', 'GO:0032835', 'GO:0048731', 'GO:0006897', 'GO:0006935', 'GO:0032836', 'GO:0072015', 'GO:0099518', 'GO:0001570', 'GO:0001701', 'GO:0001822', 'GO:0008152', 'GO:0030097', 'GO:0035166', 'GO:0048008', 'GO:0009888', 'GO:0030036', 'GO:0072006']	10
Contig000729	['GO:0006542', 'GO:0008152', 'GO:0002089', 'GO:0030154', 'GO:0006541']	4
Contig011443	['GO:0008202', 'GO:0006629', 'GO:0001701', 'GO:0001890', 'GO:0006703', 'GO:0008209', 'GO:0032526', 'GO:0006694', 'GO:0006702']	5
Contig014468	['GO:0006508', 'GO:0030198', 'GO:0030574', 'GO:0001822', 'GO:0042756', 'GO:0050790', 'GO:0032963']	5
Contig013796	['GO:0042981', 'GO:0043123', 'GO:0051092', 'GO:0001819', 'GO:0002446', 'GO:0016064', 'GO:0032725', 'GO:0032740', 'GO:0032755', 'GO:0032874', 'GO:0043280', 'GO:0046330', 'GO:0048874', 'GO:0051260', 'GO:0061760', 'GO:2000318', 'GO:0007254', 'GO:0009410', 'GO:0009620', 'GO:0032494', 'GO:0032495', 'GO:0032663', 'GO:0032675', 'GO:0032680', 'GO:0032722', 'GO:0032760', 'GO:0043330', 'GO:0045089', 'GO:00…	12
Contig004809	['GO:0046294', 'GO:0007186', '', 'GO:0097237', 'GO:0098754']	2
Contig010305	['GO:0006338', 'GO:0006355', 'GO:0008285', 'GO:0030336', 'GO:0034728', 'GO:2000779', 'GO:0006974', 'GO:0048856', 'GO:0006337', 'GO:1905168', 'GO:0003007', 'GO:0042592', 'GO:0048568', 'GO:0060038', 'GO:0060982', 'GO:0072359', 'GO:0006325', 'GO:0006357', 'GO:0030071', 'GO:0045582', 'GO:0045597', 'GO:0045663', 'GO:0045944', 'GO:0070316', 'GO:2000045', 'GO:2000781', 'GO:2000819', 'GO:0010468', 'GO:00…	14
Contig008498	['GO:0006974', 'GO:0008219']	1
Contig000286	[]	0
Contig002081	['GO:0071543', 'GO:0071544', 'GO:0110154', 'GO:1901907', 'GO:1901909', 'GO:1901911', 'GO:0009117', 'GO:0009154', 'GO:1901292', 'GO:0007267', 'GO:0015961', 'GO:1901615']	3
Contig010349	['GO:1902430']	0
Contig011244	['GO:0006468', 'GO:0001889', 'GO:0006469', 'GO:0007254', 'GO:0014912', 'GO:0031665', 'GO:0032436', 'GO:0032496', 'GO:0043405', 'GO:0043433', 'GO:0045645', 'GO:0045651', 'GO:0045659', 'GO:0048662', 'GO:0051443', 'GO:0000165', 'GO:0001933', 'GO:0008285', 'GO:0030336', 'GO:0043549', 'GO:0045732', 'GO:0009617', 'GO:0042127', 'GO:2000060']	8
Contig015973	['GO:0030154', 'GO:0048856', 'GO:0008045', 'GO:0009887', 'GO:0016358', 'GO:0009888', 'GO:0007528', 'GO:0043113', 'GO:0030182']	5
Contig001474	['GO:0006915']	1
Contig006328	['GO:0033108', 'GO:0045040', 'GO:0006605', 'GO:0007005', 'GO:0065003', 'GO:0090150', 'GO:0042407', 'GO:0007007', 'GO:0008104']	3
Contig003090	['GO:0006825', 'GO:0035434', 'GO:0065008', 'GO:0006812', 'GO:0006878', 'GO:0006882', 'GO:0007595', 'GO:0015677', 'GO:0015680', 'GO:0046688', 'GO:0051208', 'GO:0051649', 'GO:0055070', 'GO:0060003', 'GO:0030003', 'GO:0006811', 'GO:0071280', 'GO:1990961']	9
Contig002682	['GO:0006520', 'GO:0006532', 'GO:0009058', 'GO:0006066', 'GO:0006094', 'GO:0006107', 'GO:0006114', 'GO:0006533', 'GO:0007219', 'GO:0019550', '', 'GO:0032869', 'GO:0051384', 'GO:0055089', 'GO:0006103', 'GO:0006536', 'GO:0006531', 'GO:0008652', 'GO:0030511', 'GO:0032966', 'GO:0043648', 'GO:0051481', 'GO:0051902', 'GO:0060290', 'GO:0071260', 'GO:1990267', 'GO:0005975', 'GO:1901615']	6
Contig000839	['GO:0051493', 'GO:0001578', 'GO:0031116', 'GO:0031122']	1
Contig005749	['GO:0006468', 'GO:0007156', 'GO:0018108', 'GO:0007155', 'GO:0016310', 'GO:0007169', 'GO:0014707', 'GO:0033674', 'GO:0048484', 'GO:0048675', 'GO:0065003', 'GO:0072114', 'GO:1901166', 'GO:0001755', 'GO:0001822', 'GO:0006508', 'GO:0007275', 'GO:0009653', 'GO:0010975', 'GO:0019222', 'GO:0030155', 'GO:0030335', 'GO:0033555', 'GO:0043410', 'GO:0045893', 'GO:0048534', 'GO:0048666', 'GO:0051897', 'GO:00…	24
Contig014434	['GO:0007155', 'GO:0019062', 'GO:0051963', 'GO:0007156', 'GO:0007157', 'GO:1902414', 'GO:0050803', 'GO:0002089', 'GO:0002934', 'GO:0006826', 'GO:0048593', 'GO:0060041', 'GO:0070166', 'GO:0098609', 'GO:0007411', 'GO:0046718', 'GO:0050807', 'GO:0006955', 'GO:0098742', 'GO:0008104']	8
Contig002122	['GO:0030198', 'GO:0038063', 'GO:0071230', 'GO:0007155', 'GO:0035821']	5
Contig000252	['GO:0009887', 'GO:0038098', 'GO:0003205', 'GO:0003230', 'GO:0051216', 'GO:0060536', '', 'GO:0009966', 'GO:0010172', 'GO:0030514', 'GO:0019221', 'GO:0060300', 'GO:0048263', 'GO:0034097']	4
Contig002539	['GO:0006470', 'GO:0016311', 'GO:0042692', 'GO:0070373', 'GO:0042593', 'GO:0043409', 'GO:0043408', 'GO:0035335']	3
Contig009591	['GO:0006457', 'GO:0006611', 'GO:0016226', 'GO:0030218', 'GO:0034620', 'GO:0042026', 'GO:0045646', 'GO:0045647', 'GO:0051085', 'GO:1902037', 'GO:1903707', 'GO:0008152', 'GO:0009408', 'GO:0019222', 'GO:0030150', 'GO:0043170', 'GO:0046777', '', 'GO:0006886', 'GO:0007007', 'GO:0043066', 'GO:0007005', 'GO:0045595', 'GO:0061077']	14
Contig005293	['GO:0007274', 'GO:0099509']	0
Contig007503	['GO:0048488', 'GO:0006897', 'GO:0051649', 'GO:0007612', 'GO:0043547', 'GO:0045807', 'GO:0007268']	3
Contig012589	['GO:0007049', 'GO:0050790', 'GO:0006606', 'GO:0007179', 'GO:0009409', 'GO:0009725', 'GO:0009966', 'GO:0010629', 'GO:0019216', 'GO:0019222', 'GO:0030100', 'GO:0030334', 'GO:0031667', 'GO:0034121', 'GO:0042593', 'GO:0045088', 'GO:0050766', 'GO:0050768', 'GO:0050776', 'GO:0051289', 'GO:0060100', 'GO:2000045', 'GO:2000178', 'GO:0023052', 'GO:0002024', 'GO:0009631', 'GO:0010762', 'GO:0033211', 'GO:00…	15
Contig008191	['GO:0008202', 'GO:0042632', 'GO:1901615', 'GO:0008203', 'GO:0010742', 'GO:0010878', 'GO:0033344', 'GO:0034379', 'GO:0042986', 'GO:0006066', 'GO:0006629', 'GO:0030301', 'GO:0030299']	6
Contig005697	['GO:0042446', 'GO:0006590', 'GO:0008152', 'GO:0015705', 'GO:0030878', 'GO:0031641', 'GO:0042403', 'GO:0009268', 'GO:0045056']	4
Contig014870	['GO:0006357', 'GO:0006351', 'GO:0045944']	3
Contig008398	['GO:0006338', 'GO:0055085', 'GO:0008643', 'GO:0098609', 'GO:0045785', 'GO:0050790', 'GO:0007018', 'GO:0000398', 'GO:0000184', 'GO:0032984']	6
Contig002826	[]	0
Contig009267	['GO:0030512', 'GO:0090263', 'GO:0007179', 'GO:0009953', 'GO:0030168', 'GO:0030514', 'GO:0008284', 'GO:0008360', 'GO:0010717', 'GO:0016477', 'GO:0045667', 'GO:0045893', 'GO:0010718', 'GO:0032092', 'GO:0045668', 'GO:0030154', 'GO:0048856', 'GO:0045595', 'GO:0007178', 'GO:0042127', 'GO:0043393']	11
Contig012477	['GO:0007017', 'GO:0042752', 'GO:0070453', 'GO:0006783', 'GO:0048511', 'GO:0009889']	4
Contig014850	['GO:0000462', 'GO:0006281', 'GO:0006289', 'GO:0006294', 'GO:0006362', 'GO:0006366', 'GO:0006367', 'GO:0006974', '', 'GO:0071480', 'GO:0009314', 'GO:0006351', 'GO:0006357', 'GO:0006468', 'GO:0065003']	8
Contig013766	['GO:0006412', 'GO:1903008', 'GO:0002181', 'GO:0006415', 'GO:0006996', 'GO:0032790', 'GO:0010467']	4
Contig006165	['GO:0006355', 'GO:0006357', 'GO:0007601', 'GO:0048666', 'GO:0042551', 'GO:0060040', 'GO:0050896', 'GO:0030182']	6
Contig009133	['GO:0030097', 'GO:0006511', 'GO:0048856', 'GO:0007127', 'GO:0043161', 'GO:0006508']	6
Contig012055	['GO:0003333', 'GO:0015734', 'GO:0015808', 'GO:0015816', 'GO:0015824', 'GO:0032328', 'GO:0035524', 'GO:0089718', 'GO:1902475', 'GO:1902600', 'GO:0006865', 'GO:0015804', 'GO:0015807', 'GO:0098655', 'GO:0098656']	5
Contig010912	['GO:0006355', 'GO:0006357', '', 'GO:0051726', 'GO:2000779', 'GO:0006974', '', '', 'GO:1905168', 'GO:0006325', 'GO:0042981', 'GO:0045893', 'GO:0010468']	7
Contig015328	['GO:0006303', 'GO:0006974', 'GO:0031848', 'GO:0036297', 'GO:0090304', 'GO:0000723', 'GO:0006302', 'GO:0006310', 'GO:0010212', 'GO:0030183', 'GO:0033151', 'GO:0051276', 'GO:0002250', 'GO:0002376', 'GO:0006281', 'GO:0006259']	16
Contig016008	['GO:0006355', 'GO:0006357', 'GO:0019222', 'GO:0045444', 'GO:0045893', 'GO:0060612', 'GO:0050873', 'GO:0120162', 'GO:0009409', 'GO:0009888']	5
Contig003985	['GO:0007268', 'GO:0043113', 'GO:0045197', 'GO:0097120', 'GO:0098609', 'GO:0035865', 'GO:0046037', 'GO:0046710', 'GO:0099641', 'GO:0099642', 'GO:0019233', 'GO:0045163', 'GO:0099562', 'GO:0099645', 'GO:0007155', 'GO:0008104']	5
Contig009571	[]	0
Contig010677	['GO:0007186', 'GO:0007217', 'GO:0007218', 'GO:0014070', 'GO:0051480', 'GO:1901317', 'GO:0071314', 'GO:1902093', 'GO:0007204', 'GO:0048265', 'GO:0070472', 'GO:0002118', 'GO:0002526', 'GO:0002687', 'GO:0003051', 'GO:0007611', 'GO:0007616', 'GO:0008217', 'GO:0008306', 'GO:0009408', 'GO:0009725', 'GO:0010193', 'GO:0010634', 'GO:0010996', 'GO:0014910', 'GO:0019233', 'GO:0032224', 'GO:0032230', 'GO:00…	8
Contig015706	['GO:0065003', 'GO:0007041', 'GO:0051259', 'GO:0030200', 'GO:0009056', '']	4
Contig005280	['GO:0010604', 'GO:0045935', 'GO:0006974', 'GO:0010564', 'GO:0045786', 'GO:0045893', 'GO:0016310', 'GO:0006338', 'GO:0018108', 'GO:0006325', '', 'GO:0043687', 'GO:0045945', 'GO:1905213', '', 'GO:0045943', 'GO:0045944', 'GO:0006974', 'GO:0006357', 'GO:0051726']	8
Contig005436	['GO:0007269', 'GO:0014059', 'GO:0016192', 'GO:0017156', 'GO:0017158', 'GO:0048488', 'GO:0048791', 'GO:0071277', 'GO:0006897', 'GO:0007268', 'GO:0051592', 'GO:0051649', 'GO:1903861', 'GO:0030154', 'GO:0017157']	7
Contig010922	['', 'GO:0007186', 'GO:0007187', 'GO:0007197', 'GO:0014050', 'GO:0014061', 'GO:0014063', 'GO:0050890', 'GO:0071880', 'GO:0007194', 'GO:0007204', 'GO:0007268', 'GO:0007612', 'GO:0007613', 'GO:0014053', 'GO:0014070', 'GO:0042755', 'GO:0042756', 'GO:0045776', 'GO:0046058', 'GO:0050679', 'GO:0090238', 'GO:0098664', 'GO:1904321', 'GO:0007420', 'GO:0007269', 'GO:0007213', 'GO:1903351']	8
Contig004126	['GO:0015031', 'GO:0006505', 'GO:0006888', 'GO:0044255', 'GO:0060628', 'GO:1902953', 'GO:0007605', 'GO:0009880', 'GO:0009948', 'GO:0021871', 'GO:0060322', 'GO:0006506']	4
Contig014305	['GO:0046599', 'GO:0051726']	1
Contig004910	['GO:0016043', 'GO:0033365', 'GO:0071816', 'GO:0090150', 'GO:0045048', 'GO:0050821', 'GO:0006620', 'GO:0007605', 'GO:0050808', 'GO:0071599', 'GO:0001964', 'GO:0007507', 'GO:0010996', 'GO:0060041', 'GO:0007029', 'GO:0008104']	8
Contig001669	['GO:0007030', 'GO:0006897', 'GO:0042953', 'GO:0055088', 'GO:0015031', 'GO:0032368', 'GO:0010638', 'GO:0008104', 'GO:0022900', 'GO:0033617', 'GO:1902600']	6
Contig008598	['GO:0006355', 'GO:0006357', '', 'GO:0006338', 'GO:0006469', 'GO:0010468']	4
Contig002076	['GO:0006998', 'GO:1902531', 'GO:0022008', 'GO:0035914', 'GO:0043409', 'GO:0051898', 'GO:0060914', 'GO:0071168', 'GO:0030514']	2
Contig015363	['GO:0006508', 'GO:0006518', 'GO:0016485', 'GO:0016055', 'GO:0010467', 'GO:0007186']	6
Contig006114	['GO:0006879']	1
Contig006510	['GO:0006811', 'GO:0045016', 'GO:0006089', 'GO:0015693', 'GO:0034220']	3
Contig013049	['GO:0006516', 'GO:0036503', 'GO:0031146', 'GO:0006511', 'GO:0016567', 'GO:0031396', 'GO:0099576', 'GO:0008285', 'GO:0006508', 'GO:0036211', '']	8
Contig007869	['GO:0010467', 'GO:0098976', 'GO:0098977']	1
Contig001220	['GO:0007041', 'GO:0044794', 'GO:0001889', 'GO:0007186', 'GO:0007283', 'GO:0009791', 'GO:0031100', 'GO:0032526', 'GO:0042981', 'GO:0043065', 'GO:1904772', 'GO:0015031', 'GO:0048009', 'GO:0006898', 'GO:0035821']	8
Contig015473	['GO:0006351', 'GO:0006355', 'GO:0048384', 'GO:0006357', 'GO:0071376', 'GO:0000122', 'GO:0007275', 'GO:0009725', 'GO:0030154', 'GO:0045944', 'GO:0009755', 'GO:0048856', 'GO:0001657', 'GO:0002068', 'GO:0003417', 'GO:0006915', 'GO:0008283', 'GO:0012501', 'GO:0021756', 'GO:0022008', 'GO:0032331', 'GO:0035116', 'GO:0035264', 'GO:0043065', 'GO:0043068', 'GO:0048048', 'GO:0048566', 'GO:0055012', 'GO:00…	17
Contig013093	[]	0
Contig006112	['GO:0008643', 'GO:0090481', 'GO:1990569', 'GO:0072334', 'GO:0001675', 'GO:0007283', 'GO:0007286', 'GO:0007289', 'GO:0030382', 'GO:0006047', 'GO:0035721', 'GO:0060271']	7
Contig004977	['GO:0001845', 'GO:0006914', 'GO:0034976', 'GO:0060244', 'GO:2001241', 'GO:0007601', 'GO:0042073', 'GO:0042462', 'GO:0060042', 'GO:0060271', 'GO:0071482', 'GO:0007155']	7
Contig009518	['GO:0050776', 'GO:0046636', 'GO:0022408', 'GO:0010628', 'GO:0010950', 'GO:0030335', 'GO:0031638', 'GO:0032689', 'GO:0032693', 'GO:0032700', 'GO:0032720', 'GO:0045591', 'GO:0120158', 'GO:2000562', 'GO:2000565', 'GO:0002725', 'GO:0030509', 'GO:0030513', 'GO:0048863', 'GO:2000738']	4
Contig007825	['GO:0042167', 'GO:0042168']	1
Contig010111	['GO:0090630', 'GO:0043547', 'GO:1902018']	1
Contig014693	['GO:0060262', 'GO:0009889', 'GO:0007224', 'GO:0018345']	2
Contig008146	[]	0
Contig009095	['GO:0001764', 'GO:0007158', 'GO:0048856', 'GO:0098609', 'GO:0034394', 'GO:0048105', 'GO:2000009', 'GO:0015031', 'GO:0007155', 'GO:0016477', 'GO:0022008']	6
Contig001973	['GO:0001973', 'GO:0007186', 'GO:0008285', 'GO:0030336', 'GO:0032088', 'GO:0010646', 'GO:0023051', 'GO:0014061', 'GO:0099171', 'GO:0002553', 'GO:0002687', 'GO:0043491', 'GO:0051897', 'GO:0019722', 'GO:0043303', 'GO:0043306', 'GO:0050729', 'GO:0050850', 'GO:0070254', 'GO:0070257', 'GO:0006954', 'GO:0007190', 'GO:0008016', 'GO:0009611']	11
Contig011599	['GO:0006811', 'GO:0006816', 'GO:0006828', 'GO:0055071', 'GO:0070588', 'GO:0071421', 'GO:0006874', 'GO:0008544', 'GO:0016339', 'GO:0030036', 'GO:0032468', 'GO:0032472', 'GO:0034220', 'GO:0042998', 'GO:0098629', 'GO:0016043', 'GO:0030026', 'GO:0043123', 'GO:0009888', 'GO:0098742', 'GO:1903078', 'GO:0007155', 'GO:0030036', 'GO:0032880']	12
Contig006281	['GO:0006054']	1
Contig013412	['GO:0007186', 'GO:0006940', 'GO:0001659', 'GO:0007218', 'GO:0060259', 'GO:0097009', 'GO:2000821', 'GO:0045987', 'GO:0050806', 'GO:0001696', 'GO:0003084', 'GO:0007204', 'GO:0010460', 'GO:0019233', 'GO:0031652', 'GO:0042755', 'GO:0045187', 'GO:0046887', 'GO:0060455', 'GO:0120061', 'GO:0120069', 'GO:1902722', 'GO:1903999', 'GO:1904058', 'GO:2000252', 'GO:0009648']	6
Contig006582	['GO:0008104', 'GO:0042981']	1
Contig012961	['GO:0006508', 'GO:0016485', 'GO:0016486', 'GO:0048703', 'GO:0007275', 'GO:0048598', 'GO:0001921', 'GO:0007507', 'GO:0010467', 'GO:0010814', 'GO:0010815', 'GO:0010816', 'GO:0031175', 'GO:0034959', 'GO:0035050', 'GO:0042447', 'GO:0042733', 'GO:0043583', 'GO:0060037', 'GO:0060385', 'GO:0097492', 'GO:1902287', 'GO:0005975', 'GO:0048513', 'GO:0001666', 'GO:0006915', 'GO:0008217', 'GO:0010613', 'GO:00…	14
Contig012884	['GO:0016310', 'GO:0006829', 'GO:0006882', 'GO:0030001', 'GO:0034755', 'GO:0030003', '', 'GO:0006812', 'GO:0055085', 'GO:0098655', '', 'GO:0006879', 'GO:0034220', 'GO:0070574', 'GO:0071577', 'GO:0006811', 'GO:0007034', 'GO:0015031', 'GO:0045324', 'GO:0007041', 'GO:0006622', 'GO:0006605', 'GO:0006886', 'GO:0043952', 'GO:0065002', 'GO:0045184', '', 'GO:0071806', 'GO:0016485', 'GO:0071586', 'GO:0080…	47
Contig000697	['GO:0008284', 'GO:0010628', 'GO:0010884', 'GO:0070352', 'GO:0071773', 'GO:0090336', 'GO:0030154', 'GO:0045595']	3
Contig014554	['GO:0006511', 'GO:0016567', 'GO:0050709', 'GO:0032880', 'GO:0050790', 'GO:0010224', 'GO:0006508']	4
Contig004221	['GO:0060271', 'GO:0030317', 'GO:0061966', 'GO:0006511', 'GO:0016579', 'GO:0036211', 'GO:0043170', 'GO:0022414']	5
Contig013494	['GO:0006139', 'GO:0006414', 'GO:0032968', 'GO:0006368', 'GO:0034728', 'GO:0042789', 'GO:0006325', 'GO:0006334', 'GO:0006355', 'GO:0006366', 'GO:0009653', 'GO:0010468', 'GO:0045595', 'GO:0000018', 'GO:0010793', 'GO:0019222', 'GO:0140673', 'GO:0000122', '', 'GO:0000433', 'GO:0001178', 'GO:0006338', 'GO:0006357', 'GO:0016973', 'GO:0031440', 'GO:0031564', 'GO:0045944', '', 'GO:0009267', 'GO:0030447'…	28
Contig005461	['GO:0055001', 'GO:0048731', 'GO:0031032', 'GO:0097435', 'GO:0050848', 'GO:0051480', 'GO:1905289', 'GO:0030036']	3
Contig003791	['GO:0006897', 'GO:0006898', 'GO:0071222', 'GO:0071346', 'GO:0071353', 'GO:0046718', 'GO:0002376', 'GO:0045087']	4
Contig012303	['GO:0005975', 'GO:0008152', 'GO:0006355', 'GO:0009311', 'GO:0005975']	4
Contig010061	['GO:0046856', 'GO:0005975', 'GO:1901615', 'GO:0033137', '', 'GO:0010977', 'GO:0031115', 'GO:0019637']	3
Contig006590	['GO:0006360', 'GO:0045943', 'GO:0065003', 'GO:0001188']	3
Contig012657	['', '', '', '', '', 'GO:0006325', 'GO:0045893', '']	2
Contig008453	['GO:0009966', 'GO:0030512', 'GO:0060392']	2
Contig008357	['', 'GO:0060261', 'GO:0002639', 'GO:0006974', 'GO:0010212', '', 'GO:0031398', 'GO:0035556', 'GO:0043433', 'GO:0045944', 'GO:0050776', 'GO:0030330', 'GO:0045830', '', 'GO:0001570', 'GO:0043542', 'GO:0048304', 'GO:0060612', 'GO:0060717', 'GO:1902749', 'GO:0006974', 'GO:0006281', 'GO:0006310', '', 'GO:0002821', 'GO:0010628', 'GO:0042770', 'GO:2000144', '', '', 'GO:0031323', 'GO:0050778', 'GO:005079…	12
Contig001552	[]	0
Contig015668	['GO:0003341', 'GO:0035082', 'GO:0060271', 'GO:0060294', 'GO:0062177', 'GO:0120221', 'GO:0030030', 'GO:0065003', 'GO:0044458', 'GO:1905199', 'GO:0007286', 'GO:0048870', 'GO:0019752', 'GO:0001578', 'GO:0007281', 'GO:0005975', 'GO:0008152']	12
Contig015120	['GO:0006400', 'GO:0010467', 'GO:0008033']	3
Contig001953	['', 'GO:0006325', 'GO:0007283']	2
Contig010466	['GO:0032147', 'GO:0060236', 'GO:0007049', 'GO:0051301', 'GO:0090307', 'GO:0031109', 'GO:0031114', 'GO:0065003', 'GO:0097435', 'GO:0007020', 'GO:0007026', 'GO:0006915', 'GO:0051225', 'GO:0000278', 'GO:0001934', 'GO:0043549', 'GO:0051493', 'GO:0051726']	10
Contig008339	['GO:0006309', 'GO:0090304', '', 'GO:0006915']	3
Contig008524	['GO:0006508', 'GO:0031639', 'GO:0035821']	3
Contig002134	['GO:0009966', 'GO:0045954', 'GO:0050776', 'GO:0007267', 'GO:0006968', 'GO:0002250', 'GO:0002376', 'GO:0045087', 'GO:0006959', 'GO:0042267', 'GO:0050860']	6
Contig001602	['GO:0043048', 'GO:0008610', 'GO:0044255', 'GO:0016310', 'GO:0006629']	4
Contig013028	[]	0
Contig013012	['GO:0006508', 'GO:0006915', 'GO:0042981', 'GO:0001822', 'GO:0006919', 'GO:0008630', 'GO:0043065', 'GO:0048696', 'GO:0097194', 'GO:0097205', 'GO:0006974', 'GO:0007275', 'GO:0016485', 'GO:0019222', 'GO:0034644', 'GO:0035556', 'GO:0008635', 'GO:0009411', 'GO:0012501', 'GO:0042770', 'GO:0043525', 'GO:0044346', 'GO:0051402', 'GO:0071549', 'GO:0097202', 'GO:1904019', 'GO:0006974', 'GO:0048513', 'GO:00…	20
Contig012439	['GO:0035278', 'GO:0000289', 'GO:0017148', 'GO:0035195', 'GO:0060213', 'GO:0061014', 'GO:0007492', 'GO:0009267', 'GO:0006417', 'GO:0031047', 'GO:0032507', 'GO:1900153', 'GO:0010468', 'GO:0010629']	6
Contig008535	['GO:0015031', 'GO:0016192', 'GO:0006886', 'GO:0006890', 'GO:0008104', 'GO:0007169', 'GO:0016477', 'GO:0031584', 'GO:0043066', 'GO:0045944', 'GO:0051128', 'GO:0060996', 'GO:2000377', 'GO:0030182']	10
Contig010117	['GO:0000122', 'GO:0001837', 'GO:0001934', 'GO:0002062', 'GO:0006281', 'GO:0007267', 'GO:0008284', 'GO:0010564', 'GO:0010628', 'GO:0031507', 'GO:0035556', 'GO:0035987', 'GO:0035988', 'GO:0043066', 'GO:0045444', 'GO:0045766', 'GO:0045859', 'GO:0045944', 'GO:0048333', 'GO:0072091', 'GO:0090304', 'GO:0090398', 'GO:2000779', 'GO:0006355', 'GO:0006351', 'GO:0003131', 'GO:0006284', 'GO:0043392', 'GO:00…	29
Contig006703	['GO:0006486', 'GO:0006682', 'GO:0009312', 'GO:0030259', 'GO:0006629', 'GO:0005975']	2
Contig003025	['GO:0001775', 'GO:0098742', 'GO:0033004', 'GO:0043303', 'GO:0007166', 'GO:0098609', 'GO:0006468', 'GO:0030198']	4
Contig008779	['GO:0015908', 'GO:0033993', 'GO:0098856', 'GO:0006631', 'GO:0015909', 'GO:0050892']	4
Contig013774	['GO:0008285', 'GO:0016525', 'GO:0030948', 'GO:0038026', 'GO:0043065', 'GO:0043087', 'GO:0009968', 'GO:0030947', 'GO:0000122', 'GO:0001933', 'GO:0007252', 'GO:0008625', 'GO:0010596', 'GO:0010633', 'GO:0010719', 'GO:0010976', 'GO:0051898', 'GO:0021814', 'GO:0021819', 'GO:0030163', 'GO:0031334', 'GO:0032088', 'GO:0034144', 'GO:0034260', 'GO:0035148', 'GO:0035924', 'GO:0036324', 'GO:0042177', 'GO:00…	22
Contig009081	['GO:0015031', 'GO:0008104', 'GO:0016567', 'GO:0006511', 'GO:0045746', 'GO:0006858', 'GO:0140112', 'GO:0007601']	5
Contig007209	['GO:0007010', 'GO:0007492', 'GO:0007616', 'GO:0009952', 'GO:0016477', 'GO:0022604', 'GO:0048168', 'GO:0050804', 'GO:0099149', 'GO:1900271', 'GO:1900452', 'GO:2000969', 'GO:0048856', 'GO:0051028', 'GO:0051260', 'GO:0061001', 'GO:0110077', 'GO:0006897', 'GO:0007612', 'GO:0060291', 'GO:0060997', 'GO:0007613', 'GO:0051259']	10
Contig001921	['', 'GO:0007507', 'GO:0007519', 'GO:0030154', 'GO:0051155', 'GO:0014866', 'GO:0030239', 'GO:0030240', 'GO:0030241', 'GO:0045214', 'GO:0048741', 'GO:0048769', '', 'GO:0060047', 'GO:0071690', 'GO:0032259', 'GO:0006996', 'GO:0010831', 'GO:0045663', 'GO:0006338', 'GO:0035914', 'GO:0045892', 'GO:0007517', '']	8
Contig008712	['GO:0000165', 'GO:0006468', 'GO:0035556', 'GO:0016310', 'GO:0007049']	4
Contig014667	['GO:0006468', 'GO:0010820', 'GO:0018107', 'GO:0035556', 'GO:1901017', 'GO:0006979', 'GO:0007231', 'GO:0038116', 'GO:0038146', 'GO:0046777', 'GO:0009410', 'GO:0016310', 'GO:0071476', 'GO:1901380', 'GO:1990869', 'GO:0030335', 'GO:0034097']	5
Contig014991	['GO:0006357', 'GO:0006355']	2
Contig000475	['GO:0000398', 'GO:0000381', 'GO:0010468', 'GO:0051252', 'GO:0007411', 'GO:0019222', 'GO:0021954', 'GO:0120163', 'GO:0006397', 'GO:0007399', 'GO:0008380', 'GO:0050684', 'GO:0006396', 'GO:0010467']	12
Contig004181	['GO:0006811', 'GO:0006816', 'GO:0006874', 'GO:0035725', 'GO:0055085', 'GO:0070588', 'GO:0071805', 'GO:0098656', 'GO:0010628', 'GO:0010629', 'GO:0030282', 'GO:0006813', 'GO:0006814', 'GO:0150104', '', 'GO:0060395']	9
Contig003980	['GO:1902230', 'GO:0097752', 'GO:0006974', 'GO:0007286', 'GO:0030097', 'GO:0034644', 'GO:0044346', 'GO:0051726', 'GO:0071345', 'GO:0071447', 'GO:0071480', 'GO:2000270', 'GO:0006915', 'GO:0007049', 'GO:0043066', 'GO:0008652', 'GO:0009073', 'GO:0009423', 'GO:0046417', 'GO:0008152', 'GO:0006082', 'GO:0003333', 'GO:0009617', 'GO:0006364', 'GO:0006397', 'GO:0000462', 'GO:0006614', 'GO:0046677', 'GO:00…	15
Contig002775	['GO:0006508', 'GO:0010815']	1
Contig012132	['GO:0071816', 'GO:0031397', 'GO:0032435', 'GO:0050821', 'GO:0001782', 'GO:0001881', 'GO:0007173', 'GO:0016192', 'GO:0006952', 'GO:0045048', 'GO:0007029', 'GO:0008104', 'GO:0006486', 'GO:0097503']	8
Contig006381	['GO:0043086']	0
Contig011739	['GO:0015882', 'GO:0055085', 'GO:0006364', 'GO:0030488', 'GO:0032259', 'GO:0070475', 'GO:0008033', 'GO:0001510', 'GO:0046677', 'GO:0022900', 'GO:0016070', 'GO:0016192', 'GO:0050790', 'GO:1903232', 'GO:0032438', 'GO:0070925', 'GO:0000902', 'GO:0003016', 'GO:0006882', 'GO:0006954', 'GO:0006996', 'GO:0007040', 'GO:0007283', 'GO:0007338', 'GO:0007596', 'GO:0010467', 'GO:0030318', 'GO:0030324', 'GO:00…	24
Contig015054	['GO:0006355', 'GO:0007179', 'GO:0009653', 'GO:0030154', 'GO:0030509', 'GO:0060395', 'GO:0000578', 'GO:0003151', 'GO:0003179', 'GO:0003181', 'GO:0003206', 'GO:0006955', 'GO:0007155', 'GO:0008285', 'GO:0009950', '', 'GO:0030278', 'GO:0030512', 'GO:0030514', 'GO:0032496', 'GO:0043066', 'GO:0045444', 'GO:0045667', '', 'GO:0003148', 'GO:0003180', 'GO:0003183', 'GO:0003184', 'GO:0007352', 'GO:0030279'…	19
Contig014700	['GO:0006783', 'GO:0016226', 'GO:0006790', 'GO:0032259', 'GO:0009451']	5
Contig001456	['GO:0030488', 'GO:0001510', 'GO:0008033', 'GO:0032469', 'GO:0055088', 'GO:0003323', 'GO:0031018', 'GO:1990798', 'GO:0002128', 'GO:0032471', 'GO:0050790', 'GO:1901895', 'GO:1990845', 'GO:0010467']	4
Contig006036	['GO:0006355', 'GO:0000122', 'GO:0051865', 'GO:0045347', 'GO:0006366', 'GO:0006954', 'GO:0016567']	6
Contig004014	['GO:0050790', 'GO:0000132', 'GO:0007052', 'GO:0007264', 'GO:0010564', 'GO:0032880', 'GO:0045787', 'GO:0051493', 'GO:0051641', 'GO:0060236', 'GO:0061842', 'GO:0031291', 'GO:0051661', 'GO:1904778', 'GO:1905832', 'GO:0007049', 'GO:0051301', 'GO:0060487', 'GO:0007186', 'GO:0035556', 'GO:0051642', 'GO:0051726', 'GO:0000278', 'GO:0007265']	8
Contig001557	['GO:0002181', 'GO:0006412', 'GO:0007420', 'GO:0051726', 'GO:0010467', 'GO:0016567', 'GO:0035556', 'GO:0045732', 'GO:0006457', '', 'GO:0042026', 'GO:0045040', 'GO:0051131', 'GO:0051085', 'GO:0006986', 'GO:0043524', 'GO:0045345', 'GO:0051135', 'GO:0070507', 'GO:1903748', 'GO:1903751', 'GO:1903753', 'GO:2001234', 'GO:0032957', 'GO:0016310', '']	13
Contig011917	['GO:0006457']	1
Contig013740	['GO:0006325', 'GO:0008285', '', 'GO:0001558', 'GO:0006275', '', '', '', 'GO:0045893', 'GO:0045926', 'GO:0051726', 'GO:2000278', 'GO:2001235', 'GO:0006355', 'GO:0006473', '', 'GO:0043065', 'GO:0048144', 'GO:0048147', 'GO:0097190', 'GO:0006260', '', '', '', 'GO:0050793', 'GO:1903706', 'GO:0042127', 'GO:0042981', 'GO:0006508', 'GO:0006914', 'GO:0015031', 'GO:0000423', 'GO:0045299', 'GO:0016237', 'G…	16
Contig000096	['GO:0006470', 'GO:0016311', 'GO:0060271', 'GO:0007224', 'GO:0030030', 'GO:0035335']	4
Contig001538	['GO:0000462', 'GO:0006364', 'GO:0042254', 'GO:0045943', 'GO:2000234', 'GO:0010467', 'GO:0010468', 'GO:0045893']	6
Contig014451	[]	0
Contig002222	['GO:0006811', 'GO:1902600', 'GO:0019725', 'GO:0097401', 'GO:0048856', 'GO:0016241', 'GO:0045851']	3
Contig007862	['GO:0022414', 'GO:0000281', 'GO:0000398', 'GO:0001667', 'GO:0006911', 'GO:0007015', 'GO:0007275', 'GO:0008104', 'GO:0008360', 'GO:0009653', 'GO:0009792', 'GO:0010628', 'GO:0030030', 'GO:0030154', 'GO:0030866', 'GO:0031032', 'GO:0032506', 'GO:0042060', 'GO:0051641', 'GO:0051649', 'GO:0065003', 'GO:0021555', 'GO:0048731', 'GO:0070650', 'GO:0010631', 'GO:0015031', 'GO:0019953', 'GO:0022618', 'GO:00…	28
Contig008938	['GO:0006468', 'GO:0051321', 'GO:0016310', 'GO:0022414']	3
Contig001902	['GO:0034198', 'GO:1904263', 'GO:0009267', 'GO:0032006', 'GO:0032008', 'GO:0045860', 'GO:0072659', 'GO:1904262']	6
Contig011748	['GO:0006289', 'GO:0006950', 'GO:0006281', 'GO:0006974', 'GO:0006298', 'GO:0007346', 'GO:0010564', 'GO:0034644', 'GO:0070914', 'GO:1901990', 'GO:0045893', 'GO:0000720', 'GO:0010224', 'GO:0031573', 'GO:0006111', 'GO:0009410', 'GO:0010996', 'GO:0070914', 'GO:0051726', 'GO:0071482', 'GO:0006508', 'GO:0008152', '']	12
Contig010850	['GO:0030206', 'GO:0030166']	2
Contig013187	['GO:0006511', 'GO:0006414', 'GO:0006352', 'GO:0006366', 'GO:0016567', 'GO:0006367', 'GO:0032968', 'GO:0006357', 'GO:0006351', 'GO:0006508']	9
Contig010134	[]	0
Contig005667	['GO:0009058', 'GO:0007030', 'GO:0051260', 'GO:0090158', 'GO:0007029', 'GO:0006457', 'GO:0032880', 'GO:0043085', 'GO:0050821', 'GO:0061077', 'GO:0051726', 'GO:0006403', 'GO:0032212', '', 'GO:0070202', 'GO:0051086', 'GO:0001666', 'GO:0009889', 'GO:0007339', 'GO:0090666', '', 'GO:1904851', 'GO:1904874', 'GO:1904871', 'GO:0051179', 'GO:1903829', 'GO:1904951', 'GO:2001252', 'GO:0040032', 'GO:0032879'…	10
Contig015772	['GO:0046940', 'GO:0008152', 'GO:0006233', '', 'GO:0006227', 'GO:0006235', 'GO:0009142', 'GO:0071222', 'GO:0016310', 'GO:0009117', 'GO:1901293', 'GO:0006221']	6
Contig010401	['GO:0007030', 'GO:0008283', 'GO:0022604', 'GO:0048814', 'GO:0050769', 'GO:0016567', 'GO:0050775', 'GO:0060712', 'GO:0060716', 'GO:0032436', 'GO:0006511', 'GO:0010770', 'GO:0022008', 'GO:0050767', 'GO:0000209']	9
Contig008148	['GO:0008380', 'GO:0009615', 'GO:0031397', 'GO:0097193', 'GO:2001243', 'GO:0006383', 'GO:0010467']	4
Contig002078	['GO:0007186', 'GO:0007601', 'GO:0007602', 'GO:0050896', 'GO:0009584', 'GO:0071482', 'GO:0016038', 'GO:0009416', 'GO:0016037', 'GO:0006468', 'GO:0009583', 'GO:0043052', 'GO:0045494', 'GO:0050953', 'GO:0050960', 'GO:0060041', 'GO:0016056', 'GO:0070207', 'GO:0009585', 'GO:0007603', 'GO:0050790']	13
Contig001563	['GO:0043489', 'GO:0009416', 'GO:0009657', 'GO:0010196', 'GO:0032544', 'GO:0034337', 'GO:0045727', 'GO:0006412', 'GO:0008652', 'GO:0009073', 'GO:0009423', 'GO:0016310', 'GO:0046417']	3
Contig006446	['GO:0039536', 'GO:0009968', 'GO:0039535', 'GO:0050687', 'GO:0006281', 'GO:0090304', 'GO:0015871', 'GO:0002376', 'GO:0045087']	6
Contig008056	['GO:0055085', 'GO:0015718']	2
Contig015051	[]	0
Contig009513	['GO:0008637', 'GO:0022904', 'GO:0043065', 'GO:0006915', 'GO:0007005', 'GO:0043069', 'GO:1902882', 'GO:0006743', 'GO:0042373', 'GO:0110076', 'GO:1900407', 'GO:0042981']	5
Contig011485	['GO:0003094', 'GO:0006357', 'GO:0009889', 'GO:0030336', 'GO:0045892', 'GO:0000122', 'GO:0001967', 'GO:0006355', 'GO:0007585', 'GO:0010944', 'GO:0033262', 'GO:0044342', 'GO:0046545', 'GO:0048147', 'GO:0050673', 'GO:0060244', 'GO:2000279', 'GO:0006354', 'GO:0008283']	8
Contig001787	['GO:0001510', 'GO:0009452', 'GO:0009611', 'GO:0030593', 'GO:0036261', 'GO:0090022', 'GO:0008152', 'GO:0010467', 'GO:0006396', 'GO:0032259', 'GO:0022613']	7
Contig006546	['GO:0006259']	1
Contig005409	['GO:0015031', 'GO:0030150', 'GO:0010954', 'GO:0006626', 'GO:0006886', 'GO:0007005']	4
Contig014933	[]	0
Contig015193	['GO:0033344', 'GO:0042632', 'GO:0055085', 'GO:0015850', 'GO:0030301', 'GO:0006355', 'GO:0010875', 'GO:0015918', 'GO:0045542', 'GO:0071403', 'GO:1990830', '', 'GO:0006869']	6
Contig008391	['GO:0006744', 'GO:0032259', 'GO:1901663', 'GO:0009234']	3
Contig012837	['GO:0034220', 'GO:0098655', 'GO:0051209', 'GO:0007626', 'GO:0042491', 'GO:0048856', 'GO:0006811', 'GO:0007605', 'GO:0035556', 'GO:0007204', 'GO:0019722']	10
Contig012574	[]	0
Contig011135	['GO:0006508', 'GO:0007417', 'GO:0001894', 'GO:0046849', 'GO:0043171', 'GO:0045453', 'GO:0007040', 'GO:0007399', 'GO:0030855', 'GO:0050885', 'GO:0070198', 'GO:1905146', 'GO:0030163', 'GO:0006629', 'GO:0006352']	7
Contig013030	['GO:0042572', 'GO:0001523', 'GO:0048385', 'GO:0008610', 'GO:0044255', 'GO:0003151', 'GO:0030278', 'GO:0048387', 'GO:0060021', 'GO:0060349', 'GO:0060411', 'GO:0006629', 'GO:0007601', 'GO:0022900', 'GO:0042445', 'GO:1901615']	6
Contig014507	['GO:0006465', 'GO:0006508', 'GO:0010467']	3
Contig007710	['GO:0030036', 'GO:0030833', 'GO:0016043', 'GO:0044087', 'GO:0110053', 'GO:0032233', 'GO:0010633', 'GO:0030837', 'GO:0030838', 'GO:0032781', 'GO:0033138', 'GO:0050821', 'GO:0051496', 'GO:1900028', 'GO:0032956', 'GO:0050804', 'GO:0098885', 'GO:0099171', 'GO:2000300', 'GO:0051493']	7
Contig001231	['', 'GO:0007368', 'GO:0048856', 'GO:0051179', 'GO:0007286', 'GO:0008104', 'GO:0034620']	4
Contig014307	['GO:0030030', 'GO:0098535', 'GO:0007099', 'GO:1903251', 'GO:0009888', 'GO:0098534']	3
Contig003104	[]	0
Contig000851	[]	0
Contig009246	[]	0
Contig011435	['GO:0006811', 'GO:0006813', 'GO:0034765', 'GO:0051260', 'GO:0055085', 'GO:0071805', 'GO:0051259', 'GO:0034220']	8
Contig012912	['GO:0006811', 'GO:0006814', 'GO:0035725', 'GO:1902600']	4
Contig007395	['GO:0097010', 'GO:0001731', 'GO:0065003', 'GO:0006413', 'GO:0006412', 'GO:0010467']	4
Contig002506	['GO:0001933', 'GO:0043549', 'GO:0006469', 'GO:0051338', 'GO:2000480', 'GO:0000122', 'GO:0042308', 'GO:0016310', 'GO:0005975', 'GO:0008152', 'GO:0016052', 'GO:0005990', '']	5
Contig009349	['GO:0030166', 'GO:0009191', 'GO:0043123', 'GO:0009100', 'GO:0022414', 'GO:0006256', 'GO:0007369', 'GO:0008340', 'GO:0009408', 'GO:0030968', 'GO:0040009', 'GO:0046712', 'GO:0060465']	6
Contig006630	['GO:0001654', 'GO:0030198', 'GO:1905812', 'GO:0001525', 'GO:0001886', 'GO:0007155', 'GO:0030154', 'GO:0002376', 'GO:0045087', 'GO:0009888']	8
Contig004812	['GO:0006351', 'GO:0006357', 'GO:0006366', 'GO:0045893', 'GO:0060261', 'GO:0032968', 'GO:0051123', 'GO:0010468']	6
Contig009257	['GO:0043087', 'GO:0002009', 'GO:0006911', 'GO:0007015', 'GO:0009968', 'GO:0051056', 'GO:0050790', 'GO:0002011', 'GO:0051058', 'GO:0006897', 'GO:0030036', 'GO:0048729']	5
Contig008039	['GO:0007601', 'GO:0050896', 'GO:0045742', 'GO:0045745', 'GO:0043410', 'GO:0043086']	3
Contig003243	['GO:0000212', 'GO:0000226', 'GO:0000278', 'GO:0006468', 'GO:0007052', 'GO:0007098', 'GO:0007100', 'GO:0016310', 'GO:0051321', 'GO:0007049', '', 'GO:0032465', 'GO:0051301', 'GO:0019222', 'GO:0045931', 'GO:0019222', 'GO:0061523', 'GO:0006915', 'GO:0007051', 'GO:0007057', 'GO:0009611', 'GO:0009948', 'GO:0010629', 'GO:0018105', 'GO:0031647', 'GO:0032091', 'GO:0032436', 'GO:0043066', 'GO:0043161', 'G…	22
Contig004577	['GO:0016055', 'GO:0030705', 'GO:0031122', 'GO:0001932', 'GO:0003383', 'GO:0007264', 'GO:0031098', 'GO:0031648', 'GO:0035567', 'GO:0050790', 'GO:0090090', 'GO:0016477', 'GO:0032956', 'GO:0009888', 'GO:0035556', 'GO:0042325', 'GO:0031647']	11
Contig000795	['GO:0006084', 'GO:0006633', '', 'GO:0042592', 'GO:0051289', 'GO:0006629', 'GO:0006631', 'GO:0008152', 'GO:0010629', 'GO:0010884', 'GO:0010906', 'GO:0031667', 'GO:0031999', 'GO:0043086', 'GO:0044281', 'GO:0046322', 'GO:0050995', 'GO:0060421', 'GO:0097009', 'GO:2001295', 'GO:0009410', 'GO:0014070', 'GO:0019752', 'GO:0030509']	10
Contig008701	['GO:0006468', 'GO:0016310', '', 'GO:0007200', 'GO:0036211', 'GO:0035556']	4
Contig001917	['GO:0016567', 'GO:0043161', 'GO:0000209', 'GO:0006508', 'GO:0006511']	4
Contig015626	[]	0
Contig008683	[]	0
Contig000399	['GO:0070588', 'GO:0006811', 'GO:0006816', 'GO:0006874', 'GO:0051480', 'GO:0007605', 'GO:0030182', 'GO:0099566', 'GO:0003407', 'GO:0007420', 'GO:0000902', 'GO:0006996', 'GO:0007595', 'GO:0007626', 'GO:0008361', 'GO:0021549', 'GO:0021692', 'GO:0021702', 'GO:0021707', 'GO:0040011', 'GO:0042428', 'GO:0042472', 'GO:0045299', 'GO:0046068', 'GO:0048167', 'GO:0048839', 'GO:0050808', 'GO:0050885', 'GO:00…	13
Contig002734	['GO:0006974', 'GO:0031334', 'GO:0034184', 'GO:1990166', 'GO:2000781', 'GO:0000724', 'GO:0006281', 'GO:0016925', 'GO:0032204']	5
Contig013510	[]	0
Contig016009	['GO:0010468', 'GO:0006357', 'GO:0009952', 'GO:0042474', 'GO:0060023']	2
Contig005960	['GO:0007097', 'GO:0008104', 'GO:0031507', 'GO:0051641', 'GO:0060047', 'GO:0006998', 'GO:0007010', 'GO:0051664', 'GO:0090435', 'GO:0008285', 'GO:0071456', 'GO:0090398', 'GO:1990683', 'GO:0006606', 'GO:0006997', 'GO:0010628', 'GO:0030334', 'GO:0030951', 'GO:0031647', 'GO:0034504', 'GO:0055015', 'GO:0072201', 'GO:0090201', '', 'GO:1900180', 'GO:1903243', 'GO:2001237', 'GO:0007517', 'GO:0030010', 'G…	10
Contig006624	['GO:0006355', '', 'GO:0001568', 'GO:0006351', 'GO:0045892', 'GO:0045944', 'GO:0001558', 'GO:0001779', 'GO:0030174', 'GO:0031098', 'GO:0032786', 'GO:0045740', 'GO:0051726', 'GO:0072708', 'GO:0072710', 'GO:0072716', 'GO:0072720', 'GO:0072739', 'GO:1900182', 'GO:1902035', 'GO:2000278', 'GO:2000819', 'GO:0006275', '', 'GO:0018393', 'GO:0030217', '', '', '', 'GO:0045648', 'GO:0045815', 'GO:0006260', …	17
Contig015161	['GO:0006281', 'GO:0090304', 'GO:0000712', 'GO:0000723', 'GO:0000724', 'GO:0006289', 'GO:0006289', 'GO:0006289', 'GO:0006303', 'GO:0009411', 'GO:0009650', 'GO:0010506', 'GO:0032205', 'GO:0034644', 'GO:0061819', 'GO:1901255', 'GO:1904357', 'GO:1905765', 'GO:1905768', 'GO:0006302', 'GO:0019538', 'GO:0043170', 'GO:0006974', 'GO:0006289', 'GO:0071407', 'GO:0022414', 'GO:0071482', 'GO:0036297', 'GO:00…	16
Contig015391	['GO:0007218']	1
Contig013622	['GO:0051642', 'GO:0042073', 'GO:0061512', 'GO:0022414', 'GO:0060271', 'GO:0001736', 'GO:0001822', 'GO:0007224', 'GO:0007283', 'GO:0008542', 'GO:0022008', 'GO:0034067', 'GO:0035845', 'GO:0036372', 'GO:0045198', 'GO:0045724', 'GO:0055007', 'GO:0060122', 'GO:0060828', 'GO:0061351', 'GO:0072659', 'GO:0090102', 'GO:1902017', 'GO:2000583', 'GO:2000785', 'GO:0030030', 'GO:0030154', 'GO:0035720', 'GO:00…	14
Contig008777	['GO:0000122', 'GO:0007519', 'GO:0009968', 'GO:0045214', 'GO:0050848', 'GO:0043503', 'GO:0070885', 'GO:0070884', 'GO:0007517', 'GO:0030036', 'GO:0007059', 'GO:0030261']	6
Contig009021	['GO:0006685', 'GO:0046475', 'GO:0046513', 'GO:0006684', 'GO:0007029', 'GO:0044255', 'GO:0071356', 'GO:0001701', 'GO:0006629', 'GO:0034097']	5
Contig007693	['GO:0009888', 'GO:0016055', 'GO:0030154', 'GO:0030182', 'GO:0045165', 'GO:0046330', 'GO:0048731', 'GO:0060070', 'GO:0048513', 'GO:0022414', 'GO:0001822', 'GO:0007389', 'GO:0008283', 'GO:0009653', 'GO:0009887', 'GO:0016332', 'GO:0022009', 'GO:0030900', 'GO:0043009', 'GO:0045667', 'GO:0048568', 'GO:0048589', 'GO:0048598', 'GO:0050808', 'GO:0060429', 'GO:0060536', 'GO:0060541', 'GO:0098609', 'GO:00…	19
Contig004650	['GO:0006468', 'GO:0016310', 'GO:0007017', 'GO:0043622', 'GO:0006397', 'GO:0008380', 'GO:0033119', 'GO:0043484', 'GO:0045595', 'GO:0009653', 'GO:0030154', 'GO:0043249']	7
Contig008326	['GO:0000209', 'GO:0006511', 'GO:0016567', 'GO:0035519', 'GO:0043161', 'GO:0070534', 'GO:0070936', 'GO:0006513', 'GO:0043066', 'GO:0050687', 'GO:0051865', 'GO:2000646', 'GO:0006886', 'GO:0032088', 'GO:0032509', 'GO:0043162', 'GO:0045324', 'GO:0045732', 'GO:0046329', 'GO:0048856', 'GO:0072666', 'GO:0090085', 'GO:0002669', 'GO:0002870', 'GO:0030163', 'GO:0035739', 'GO:2000562', 'GO:0002376', 'GO:00…	15
Contig000221	['GO:0006629', 'GO:0019432', 'GO:0006641', 'GO:0008610', 'GO:0044255', 'GO:0006651', 'GO:0006071', 'GO:0007186', 'GO:0007608', 'GO:0050896', 'GO:0050911']	8
Contig014551	['GO:0006953', 'GO:0007252', 'GO:0009617', 'GO:0035634', 'GO:0050918', 'GO:0060326', 'GO:0071347', 'GO:0008203', 'GO:0001819', 'GO:0007204', 'GO:0045785', 'GO:0048246', 'GO:0048247', 'GO:0010629', 'GO:0010739', 'GO:0033138', 'GO:0044242', 'GO:0045892', 'GO:0050996', 'GO:0070374']	7
Contig007735	['GO:2000312', 'GO:0007507', 'GO:0007010', 'GO:0051865', 'GO:0097435', 'GO:0016567', 'GO:0045109']	4
Contig010185	['GO:0030154', 'GO:0048856', 'GO:0006508', 'GO:0006897', 'GO:0006883', 'GO:0016192', 'GO:0006511', '', 'GO:0016579', 'GO:0070647', 'GO:0006357', '', '', 'GO:0045815', 'GO:0000278', 'GO:0006281', 'GO:0031647', 'GO:0008380', '', '', 'GO:0009967', 'GO:0043065', 'GO:0050821', 'GO:0051607', 'GO:0010569', 'GO:0051726', 'GO:2001032', 'GO:0006468', 'GO:0016310', 'GO:0000165', 'GO:0045454', 'GO:0006518', …	17
Contig013553	['GO:0046677', 'GO:0098754', 'GO:0055085', 'GO:1990961', 'GO:0015695', 'GO:1902600', 'GO:0006855', 'GO:0042908', 'GO:0089718', 'GO:0097638', 'GO:0098655', 'GO:1902475', 'GO:1903826', 'GO:0006812', 'GO:0042886', 'GO:0015807', 'GO:0140115']	7
Contig011446	['GO:0031146', 'GO:0001701', 'GO:0006508', 'GO:0006511']	3
Contig002217	['GO:0006364', 'GO:0016567', 'GO:0000462', 'GO:0042254', 'GO:0010467']	5
Contig011913	['GO:0007157', 'GO:0048666', 'GO:0048856', 'GO:0000122', 'GO:0007155', 'GO:0007411', '', 'GO:0051491', 'GO:0098609', 'GO:0098942', 'GO:0030182', 'GO:0098742', 'GO:0050878', 'GO:0006508']	8
Contig013504	['GO:0045892', 'GO:0000122', 'GO:0006357']	2
Contig015926	['GO:0000122', 'GO:0010468', 'GO:0043066', 'GO:0070884', 'GO:0006351', 'GO:0048513', 'GO:0009968', 'GO:0050848', 'GO:0070885', 'GO:0001649', 'GO:0006357', 'GO:0009725', 'GO:0055014', 'GO:0055015', 'GO:0060347', 'GO:0006412', 'GO:0006355']	9
Contig005549	[]	0
Contig010575	['GO:0006730', 'GO:0006885', 'GO:0015670', 'GO:0038166', 'GO:0044070', 'GO:0051453', 'GO:2001150', 'GO:0002009', 'GO:0032230', 'GO:0032849', 'GO:0046903', 'GO:0070050', 'GO:2001225', 'GO:0045672', 'GO:0045780', 'GO:0001822', 'GO:0009268', '', 'GO:0010043', 'GO:0030316', 'GO:0030641', 'GO:0042475', 'GO:0043627', 'GO:0045124', 'GO:0048545', 'GO:0071498', 'GO:0007186', 'GO:0071375', 'GO:0071244']	6
Contig009693	['GO:0022414', 'GO:0060271', 'GO:0003341', 'GO:0007283', 'GO:0048870', 'GO:0060294', 'GO:0051649', 'GO:0090660', 'GO:0120197', 'GO:0120316', 'GO:0030030', 'GO:0030154', 'GO:0044458']	9
Contig003452	['GO:0006355', 'GO:0042127', 'GO:0008284', 'GO:0051301', 'GO:0010468']	5
Contig012112	['GO:0016567', 'GO:0006511', 'GO:0006814', 'GO:0050801', 'GO:0070293', 'GO:0070936', 'GO:0072078', 'GO:0070294', 'GO:0072156', 'GO:0000209', 'GO:0006468', 'GO:0010467', 'GO:0030163', 'GO:0055075', '', 'GO:0001822', 'GO:0002009', 'GO:0006508']	7
Contig012084	['GO:0007095', 'GO:0006869', 'GO:0006605', 'GO:0007005', 'GO:0007030', 'GO:0007286', 'GO:0007417', 'GO:0008104', 'GO:0009653', 'GO:0051641', 'GO:0060612', 'GO:0070925', 'GO:0001675', 'GO:0006623', 'GO:0045053', 'GO:0007399', 'GO:0016192', 'GO:0032458', 'GO:0036438', 'GO:0090168', 'GO:0031175', 'GO:0022414', 'GO:0009888', 'GO:0007281', 'GO:0006886', 'GO:0032507', 'GO:0033365', 'GO:0034067', 'GO:00…	32
Contig009399	['GO:0001696', 'GO:0007186', 'GO:0007187', 'GO:0007197', 'GO:0007268', 'GO:0098664', 'GO:0007213', 'GO:0007586', 'GO:0007193', 'GO:0099536', 'GO:1901698', 'GO:0015872', 'GO:0019226', 'GO:0060079', 'GO:0060304', 'GO:1902476', 'GO:0095500', 'GO:0071880', 'GO:1903351']	8
Contig012442	['GO:0032502', 'GO:0003281', 'GO:0035904', 'GO:0060976']	1
Contig002378	['GO:0006637', 'GO:0000038', 'GO:0001676', 'GO:0006631', 'GO:0006629', 'GO:0001666', 'GO:0042760', 'GO:0010667', 'GO:0032788', 'GO:0032789', 'GO:0008152']	6
Contig005921	['GO:0001666', 'GO:0019725', 'GO:0030301', 'GO:0035855', 'GO:0042632', 'GO:0043009', 'GO:0055113', 'GO:0015918', 'GO:0030299', 'GO:0006486', 'GO:0006629', 'GO:0006914', 'GO:0007275', 'GO:0019222', 'GO:0046718', 'GO:0046907', 'GO:0090150', 'GO:0009168', 'GO:0006869', 'GO:0006897', 'GO:0007628', 'GO:0009410', 'GO:0010467', 'GO:0016236', 'GO:0016242', 'GO:0031579', 'GO:0032367', 'GO:0033344', 'GO:00…	22
Contig001497	['GO:0006357', 'GO:0006367', '', '', 'GO:1904672', '', 'GO:0045893', 'GO:0006355', 'GO:0006282', '', 'GO:0043484', 'GO:0006366', 'GO:0006351', 'GO:0006508']	6
Contig007984	['GO:0008594', 'GO:0035845', 'GO:0039023', 'GO:0042073', 'GO:0046530', 'GO:0060271', 'GO:0007224', 'GO:0030154', 'GO:0035082', 'GO:0061512', 'GO:0015031', 'GO:0035720', 'GO:0035735', 'GO:0048468', 'GO:0007286', 'GO:1905198', 'GO:0001578', 'GO:0008104', 'GO:0007166', 'GO:0032501']	9
Contig014124	['GO:0002376', 'GO:0046856', 'GO:0000226', 'GO:0007052', 'GO:0060271', 'GO:0090316', 'GO:0001701', 'GO:0001764', 'GO:0001822', 'GO:0001944', 'GO:0007051', 'GO:0021696', 'GO:0021772', 'GO:0035050', 'GO:0035108', 'GO:0035264', 'GO:0043010', 'GO:0043066', 'GO:0048854', 'GO:0060322', 'GO:0061351', 'GO:1990403', 'GO:0030036', 'GO:0045907', 'GO:0016192', 'GO:0050790', 'GO:0015986', 'GO:0035970', 'GO:00…	24
Contig014082	['GO:0042391', 'GO:0042574', 'GO:0044255', 'GO:2000377', 'GO:0016121', 'GO:0006720', 'GO:0016124', 'GO:0051881', 'GO:0001523', 'GO:0006629', 'GO:0016116', 'GO:0016119', 'GO:0016122', 'GO:0042573', 'GO:0062172', 'GO:1901176', 'GO:1901826']	3
Contig013207	['GO:0048311', 'GO:0007005', 'GO:0051641', 'GO:0000070', 'GO:0090307']	4
Contig014409	['GO:0006260', 'GO:0006261', 'GO:0042276', 'GO:0006281']	4
Contig010564	['GO:0006707', 'GO:0051301', 'GO:0010020']	2
Contig012039	['GO:0006351', 'GO:0006402', '', 'GO:0000288', 'GO:0048666', 'GO:0000956', 'GO:0008284', 'GO:0061157', 'GO:0061014', 'GO:0006417', 'GO:0031047', 'GO:0090304', 'GO:0000289', 'GO:0035195', 'GO:0010629', 'GO:0042127']	12
Contig007812	['GO:0006468', 'GO:0006368', 'GO:0032968', 'GO:0051726', '', 'GO:0000398', 'GO:0006357', 'GO:0006366', 'GO:0030097', 'GO:0034243', 'GO:0045944', 'GO:0016310', 'GO:0009966', 'GO:0000380', 'GO:2000737', 'GO:0006397', 'GO:0008380', 'GO:0006351', 'GO:0010467', 'GO:0032784']	14
Contig003953	['GO:0007186', 'GO:0031204']	1
Contig005480	['GO:0050658']	0
Contig010855	['', 'GO:0000132', 'GO:0022414']	1
Contig012321	['GO:0007186', 'GO:0007266', 'GO:0007188', 'GO:0019222', 'GO:0030154', 'GO:0030334', 'GO:0032006', 'GO:0032434', 'GO:0048598', 'GO:0001702', 'GO:0009826', 'GO:0014003', 'GO:0032956', 'GO:0042074', 'GO:0043149', 'GO:0048932', 'GO:0055113', 'GO:0060973', 'GO:2000048', 'GO:0008217', 'GO:0008360', '', 'GO:0010762', '', 'GO:0035556', 'GO:0042733', 'GO:0001701', 'GO:0009410', 'GO:1904706', 'GO:1904753'…	15
Contig001943	['GO:0009168', 'GO:0032264', 'GO:0006188', 'GO:0046033', 'GO:0008152', 'GO:0032263', 'GO:0009117', '']	4
Contig004217	['GO:0007173', 'GO:0048513', 'GO:0006355', 'GO:0018108', 'GO:0032331', 'GO:0043010', 'GO:0048048', 'GO:0048050', 'GO:0008284', 'GO:0010977', 'GO:0031346', 'GO:1903975', 'GO:0007601', 'GO:0050878', 'GO:0006508']	6
Contig001357	['GO:0006260', 'GO:0006275', 'GO:0050790', 'GO:0006272', 'GO:0006273', 'GO:0006298', 'GO:0009892', '', '', 'GO:0010468', 'GO:0019985', 'GO:0022414', 'GO:0030855', 'GO:0031297', 'GO:0032077', 'GO:0034644', 'GO:0045739', 'GO:0045740', 'GO:1900264', 'GO:1902990', 'GO:0000122', 'GO:0006287', 'GO:0071466', 'GO:0006281', 'GO:0006974', 'GO:0006979', 'GO:0007507', 'GO:0032355', 'GO:0033993', 'GO:0044849'…	18
Contig001696	['GO:0006488', 'GO:0048856', 'GO:0007605', 'GO:0060117', 'GO:0006487', 'GO:0071805', 'GO:0006486', 'GO:0060050', 'GO:1901980']	6
Contig008285	['GO:0019344', 'GO:0019346', 'GO:0019343', 'GO:0006555', 'GO:0018272', 'GO:0043066', 'GO:0043123', 'GO:0044524', 'GO:0051092', 'GO:0051289', 'GO:0070814', 'GO:1904831', 'GO:1990830', 'GO:2001234', 'GO:0008152', 'GO:0009058', 'GO:0043170', 'GO:0050667', 'GO:0071266', 'GO:0009086', 'GO:0006629', 'GO:0006749', 'GO:0008285', 'GO:0008652', 'GO:0030308', 'GO:0006534', 'GO:0030968', 'GO:0006082', 'GO:00…	14
Contig007121	['GO:0032008', 'GO:0016239', 'GO:0034198', 'GO:1904263', 'GO:0019538', 'GO:0006511', 'GO:0006623', 'GO:0034727', 'GO:0009967', 'GO:0032006', 'GO:1903432', 'GO:0015031', 'GO:0009267', 'GO:0010506', 'GO:0045860', 'GO:0006914', 'GO:0072659', 'GO:1904262', 'GO:0006364', 'GO:0045943']	14
Contig007137	['GO:0016310']	1
Contig013403	['GO:0016567']	1
Contig008457	[]	0
Contig009448	['GO:0015914', 'GO:0045332', 'GO:1903527', 'GO:0006869', 'GO:0008360']	3
Contig004446	['GO:2000147']	0
Contig015857	['GO:0006260', 'GO:0006281', 'GO:0006303', 'GO:0006310', 'GO:0051103', 'GO:0071897', 'GO:0006974', 'GO:0006297', 'GO:0033152', 'GO:0002250', 'GO:0002320', 'GO:0008152', 'GO:0007275', 'GO:0007417', 'GO:0008283', 'GO:0008284', 'GO:0010165', 'GO:0010212', 'GO:0010467', 'GO:0016444', 'GO:0033077', 'GO:0033153', 'GO:0035019', 'GO:0043009', 'GO:0043524', 'GO:0045321', 'GO:0050769', 'GO:0051402', 'GO:00…	31
Contig003679	['GO:0016567', 'GO:0000209', 'GO:0007030', 'GO:0043161', 'GO:0061025', 'GO:0030334', 'GO:0070936', 'GO:0001947', 'GO:0003190', 'GO:0003208', 'GO:0006511', 'GO:0007049', 'GO:1903427', 'GO:0006508']	7
Contig005460	['GO:0006511', 'GO:0016567', 'GO:0043161', 'GO:0140627', 'GO:0048820', 'GO:0006508']	3
Contig006267	['GO:0006811', 'GO:0055085', 'GO:0043252', 'GO:0001889', 'GO:0006857', 'GO:0009410', 'GO:0015721', 'GO:0015732', 'GO:0032496', 'GO:0033993', 'GO:0034097', 'GO:0035672', 'GO:0043434', 'GO:0046677', 'GO:0051384', 'GO:0015711', 'GO:0006869', 'GO:0070327']	8
Contig011340	['GO:0006486', 'GO:0006672', 'GO:0007566', 'GO:0022407', 'GO:0022409', 'GO:0036065', 'GO:0045785', 'GO:0046626', 'GO:0060353', 'GO:1903037', 'GO:1903236', 'GO:1904996', 'GO:0001807', 'GO:0002523', 'GO:0097022', 'GO:1902624', 'GO:1903238', 'GO:0002361', 'GO:0002522', 'GO:0072678', 'GO:0097021', 'GO:1904994', 'GO:2000389', 'GO:0006954', 'GO:0042355', 'GO:0022414', 'GO:0016477', 'GO:0030335', 'GO:00…	12
Contig012710	['GO:0006805', 'GO:0006082']	0
Contig010335	['GO:0042795', 'GO:0042796', 'GO:0006351', 'GO:0006366']	2
Contig013344	['GO:0007219', 'GO:0007605', 'GO:0008593', 'GO:0022405', 'GO:0034505', 'GO:0009888']	3
Contig009945	['GO:0071569', 'GO:0032434', 'GO:0034976', 'GO:1990592', 'GO:0006355', 'GO:0006974', 'GO:0009968', 'GO:0016236', 'GO:0030154', 'GO:0031399', 'GO:0032880', 'GO:0042127', 'GO:0051248', 'GO:1903894', 'GO:0008284', 'GO:0009966', 'GO:0010506', 'GO:0019222', 'GO:0030218', 'GO:0032088', 'GO:0050727', 'GO:0060218', 'GO:1903008', 'GO:1903573', '', 'GO:0031397', 'GO:0033146', 'GO:0061709', 'GO:1903895', 'G…	27
Contig005547	['GO:0006821', 'GO:0055085', 'GO:1902476', 'GO:0006936', 'GO:0098656', 'GO:0019227', 'GO:0006811', 'GO:0034765']	7
Contig007476	['GO:0006508', 'GO:0006631', 'GO:0009104', 'GO:0050728']	2
Contig006521	['GO:0008284', 'GO:0010571', 'GO:0010971', 'GO:0032147', 'GO:0071902', 'GO:1901987', 'GO:0007049']	2
Contig005589	['GO:0006355', 'GO:0006357', 'GO:0003309', 'GO:0003310', 'GO:0003311', 'GO:0032880', 'GO:0042593', 'GO:0090104', 'GO:0048856', 'GO:0031018', 'GO:0035774', 'GO:0045893', 'GO:0045944', 'GO:0050796', 'GO:0030154', 'GO:0009888', 'GO:0090277']	8
Contig006719	['GO:0000226', 'GO:0007049', 'GO:0051301', 'GO:0007626']	3
Contig001293	['GO:0090630', 'GO:0043547']	1
Contig015833	['GO:0000122', 'GO:0010564', 'GO:0045786', 'GO:0032259', 'GO:0019538', 'GO:1902807', 'GO:0008152', 'GO:0051726', 'GO:0006479', 'GO:0006596', 'GO:1901987', 'GO:0008152', 'GO:0044238', 'GO:1902806', '']	7
Contig013042	['GO:0097746', 'GO:0007186', 'GO:0035556', 'GO:0003085', 'GO:0006182', 'GO:0007168', 'GO:0007218', 'GO:0009792', 'GO:0019934', 'GO:0008217', 'GO:0042311', 'GO:0006457', 'GO:0010753', 'GO:0014898', 'GO:0030308', 'GO:0031640', 'GO:0035810', 'GO:0035815', 'GO:0048662', 'GO:0061844', 'GO:1903816', 'GO:1904055', 'GO:0003161', 'GO:0007166', 'GO:0007589', 'GO:0016525', 'GO:0043114']	13
Contig001014	[]	0
Contig000613	['GO:0016310', 'GO:0050890', 'GO:0015031']	2
Contig010957	['GO:0006457', 'GO:0006508', '', 'GO:0036503', 'GO:0034976', 'GO:0043161', 'GO:1901698', 'GO:0007283', 'GO:0030154']	7
Contig005156	['GO:0032543']	1
Contig000235	['GO:0001510', 'GO:0006355', 'GO:0006364', 'GO:0031167', 'GO:0032259', 'GO:0006351', 'GO:0070475', 'GO:0019222', 'GO:0032434', 'GO:1903573', 'GO:0031397', 'GO:0032435', 'GO:1903094', 'GO:1904293', 'GO:2000157', 'GO:0043161', 'GO:0042177', 'GO:0007283', 'GO:0042006', 'GO:0045732', 'GO:0010466', 'GO:1905897', 'GO:0030154', 'GO:0031396', 'GO:0043086', 'GO:0045861', 'GO:1901799', 'GO:0006357', 'GO:00…	14
Contig002340	['GO:0000902', 'GO:0007155', 'GO:0007283', 'GO:0019222', 'GO:0021885', 'GO:0048609', 'GO:0034122', 'GO:0043277', 'GO:0043491', 'GO:0043524', 'GO:0045088', 'GO:0046777', 'GO:0050728', 'GO:0070050', 'GO:0070527', 'GO:0006468', 'GO:0018108', 'GO:0006909', 'GO:0007399', 'GO:0016477', 'GO:0016310', 'GO:0007169', 'GO:0032940', 'GO:0033674', 'GO:0034446', 'GO:0042698', 'GO:0045824', 'GO:0001764', 'GO:00…	19
Contig010192	['GO:0016567', 'GO:0010468', 'GO:0045087', 'GO:0002376', 'GO:0006914', 'GO:0051607', 'GO:0035821']	6
Contig005923	['GO:0006468', 'GO:0016310', 'GO:0030490', 'GO:0006364', 'GO:0009968', 'GO:0032728', 'GO:0045089', 'GO:0050687', 'GO:0071407', 'GO:0098586', 'GO:1901698', 'GO:0002376', 'GO:0031333', 'GO:0039534', 'GO:0042254', 'GO:0043124', 'GO:0045087', 'GO:0071359', 'GO:1990786', 'GO:0051607', 'GO:0007059', 'GO:0001819', 'GO:0010467', 'GO:0010628', 'GO:0014070', 'GO:0009987', 'GO:0042274', 'GO:0043122', 'GO:00…	17
Contig016066	['GO:0007160', 'GO:0002684', 'GO:0007155', 'GO:0007399', 'GO:0030154']	4
Contig009057	['GO:0031643', 'GO:0045944', 'GO:0051865', 'GO:0060253', 'GO:0010626', 'GO:0045893', 'GO:0099527', 'GO:0009249', 'GO:0008285', 'GO:0022008', 'GO:0045595', 'GO:0016567', 'GO:0042127', 'GO:0050768', 'GO:0051960']	7
Contig014828	['GO:0001938', 'GO:0007186', 'GO:0007189', 'GO:0008285', 'GO:0010628', 'GO:0032812', 'GO:0032880', 'GO:0043066', 'GO:0045732', 'GO:0048242', 'GO:0070459', 'GO:0010604', 'GO:0032879', 'GO:0050896', 'GO:0048255', 'GO:0010467', 'GO:0060127', 'GO:0090277', 'GO:0007200', 'GO:0007611', 'GO:0043267', 'GO:0048662', 'GO:0051930', 'GO:0060406', 'GO:0030073', 'GO:0001878', 'GO:0007589', 'GO:0008284', 'GO:00…	13
Contig003823	['GO:0006612', 'GO:0006887', 'GO:0006893', 'GO:0006904', 'GO:0015031', 'GO:0070177', 'GO:0090522', 'GO:0030154', 'GO:0007267', 'GO:0006897', 'GO:0032120', 'GO:0000917', 'GO:0006886', 'GO:0007049', 'GO:0051301', 'GO:0050790', 'GO:0006508', 'GO:0006896', 'GO:0034727', 'GO:0048309', 'GO:0048313', 'GO:0007268', 'GO:0022414', 'GO:0006892', 'GO:0051641', 'GO:0016192', 'GO:0051649', 'GO:0048341', 'GO:00…	24
Contig009331	['GO:0006811', 'GO:0006813', 'GO:0034765', 'GO:0051260', 'GO:0055085', 'GO:0071805', 'GO:0034220', 'GO:0008016', 'GO:0051259', 'GO:0008608']	10
Contig006131	['GO:0055085', 'GO:0015910', 'GO:0006635', 'GO:0007031', 'GO:0042760', 'GO:0000038', 'GO:0006631', 'GO:0015909', 'GO:0046907', 'GO:0006633', 'GO:0006699', 'GO:0006869', 'GO:0015721', 'GO:1903512', 'GO:0001676', 'GO:0009410', 'GO:0014070', 'GO:0015908']	11
Contig005207	['GO:0055085', 'GO:0015807', 'GO:1902475', 'GO:0015711']	3
Contig006875	['GO:0034553', 'GO:0045087', 'GO:0045333', 'GO:1904231', 'GO:0007005', 'GO:0065003']	4
Contig001907	['GO:0007186', 'GO:0007189', 'GO:0019222', 'GO:0032259', 'GO:0009887', 'GO:0048731', 'GO:0007015', 'GO:0030048', 'GO:0030705', 'GO:0030050', 'GO:0030182', 'GO:0035556', 'GO:0043547', 'GO:0006396', 'GO:0030488', 'GO:0045893', 'GO:0006508']	14
Contig013791	['GO:0006457']	1
Contig013501	['GO:0045661', 'GO:0072659', 'GO:0008104', 'GO:0010629', 'GO:0019222', 'GO:0022407', 'GO:0050821', 'GO:0051092', 'GO:0051641', 'GO:2000114', 'GO:1904086', 'GO:2000047', 'GO:0007155', 'GO:0044860', 'GO:1902992', 'GO:1903905', 'GO:0098937', 'GO:0099072', 'GO:0001765', 'GO:0008544', 'GO:0010468', 'GO:0006355', 'GO:0022409', 'GO:0045595', 'GO:0072657']	7
Contig000401	['GO:0006836', 'GO:0015812', 'GO:0035725', 'GO:0006821', 'GO:0007613', 'GO:0015698', 'GO:0015711', 'GO:0050808', 'GO:0050890', 'GO:0098656', 'GO:0098719', 'GO:0055085', '', 'GO:0051939', 'GO:0098658', 'GO:1902476', 'GO:0008306', 'GO:0003333', 'GO:0098810', 'GO:1903825', 'GO:0007612', 'GO:0009636', '', 'GO:0014054', 'GO:0014074', 'GO:0032229', 'GO:0009744', '', 'GO:0010288', 'GO:0014070', 'GO:0032…	9
Contig008080	['GO:0090314', 'GO:0010359', 'GO:0010360', 'GO:0032412', 'GO:0044070', 'GO:0002244', 'GO:0030335', 'GO:0006355', 'GO:0030336']	4
Contig014186	['GO:0008152', 'GO:0044281', 'GO:0006552', 'GO:0019752', 'GO:0006768', 'GO:0009083', 'GO:0044237', '']	5
Contig002543	['GO:0002009', 'GO:0007155', 'GO:0030032', 'GO:0030334', 'GO:0034333', 'GO:0034394', 'GO:0043297', 'GO:0048675', 'GO:0051893', 'GO:0090136', 'GO:1903140', 'GO:1904702', 'GO:0008104', 'GO:0051128', 'GO:0051641', 'GO:0007160', 'GO:0030336', 'GO:0035633', 'GO:0070527', 'GO:0048729']	5
Contig012301	['GO:0006887', 'GO:0048513', 'GO:0036269', 'GO:0007015', 'GO:0032456', 'GO:0008154', 'GO:0022607', 'GO:0043933', 'GO:0016043', 'GO:0030041', 'GO:0031175', 'GO:0030036', 'GO:0034446', 'GO:0070830', 'GO:1903955', 'GO:0051017', 'GO:0030036']	10
Contig008286	['GO:0006396', 'GO:0006397', 'GO:0008380', 'GO:0010467']	4
Contig008637	['GO:0006811', 'GO:0071805', 'GO:0006813', 'GO:0030322', 'GO:0034765']	4
Contig015493	['GO:0015031', 'GO:0031647', 'GO:0032456']	2
Contig003973	[]	0
Contig002909	['GO:0050790', 'GO:0000280', 'GO:0044772', 'GO:0000278', 'GO:0007049', 'GO:0007520', 'GO:0010458', 'GO:0051301']	4
Contig001715	['GO:0006355', 'GO:0006357', 'GO:0016055', 'GO:0051726', 'GO:0090304']	5
Contig014185	['GO:0031396', 'GO:0045116', 'GO:0051443', 'GO:2000434', 'GO:2000436', 'GO:0031398']	2
Contig011378	['GO:0006629', 'GO:0007420', 'GO:0016042', 'GO:0035556', 'GO:0051726', 'GO:0007613', 'GO:0048015', 'GO:0002685', 'GO:0007186', 'GO:0007343', 'GO:0009889', 'GO:0009966', 'GO:0010564', 'GO:0010628', 'GO:0021537', 'GO:0030336', 'GO:0040019', 'GO:0044255', 'GO:0044772', 'GO:0045787', 'GO:0045892', 'GO:0045893', 'GO:0045931', 'GO:0046330', 'GO:0048009', 'GO:0048639', 'GO:0051445', 'GO:0099536', 'GO:19…	27
Contig005572	['GO:0002456', 'GO:0008593', 'GO:0010629', 'GO:0032733', 'GO:0035581', 'GO:0042102', 'GO:0043382', 'GO:0045591', 'GO:0045959', 'GO:0071636', 'GO:0007338', 'GO:0010628', 'GO:0045862', 'GO:0002250', 'GO:0002376', 'GO:0006958', 'GO:0045087', 'GO:0046718', 'GO:0055085', 'GO:0015833', 'GO:0005975', 'GO:0034219', 'GO:0008643', 'GO:0043547', 'GO:0010667', 'GO:2001237', 'GO:0008104', 'GO:0046907', 'GO:00…	18
Contig014150	['GO:0006357']	1
Contig013757	['GO:0003094', 'GO:0007156', 'GO:0007157', 'GO:0032835', 'GO:0036060', 'GO:0042462', 'GO:0045197', 'GO:0045494', 'GO:0048468', 'GO:0048793', 'GO:0060042', 'GO:0060271', 'GO:0072015', 'GO:0072104', 'GO:0098609', 'GO:1902855', 'GO:0048513', 'GO:0048731', 'GO:0001707', 'GO:0001756', 'GO:0010717', 'GO:0014028', 'GO:0030513', 'GO:0045199', 'GO:0072359', 'GO:0007420', 'GO:0021591', 'GO:0043010', 'GO:00…	28
Contig013183	['GO:0010466', 'GO:0035821']	1
Contig001234	[]	0
Contig004929	['GO:0034097', 'GO:0030277', 'GO:0060455', 'GO:0070098', 'GO:0008283', 'GO:0008285', 'GO:0009611', 'GO:0030154', 'GO:0010039', 'GO:0035902', 'GO:0042060', 'GO:0043434', 'GO:0005975']	6
Contig002484	['GO:0042407', 'GO:0007005', 'GO:0007007']	2
Contig007047	['GO:0018057', 'GO:0030199', 'GO:0030903', 'GO:0032496', 'GO:0035904', 'GO:0018277', 'GO:0006897']	3
Contig005401	['GO:0035821']	1
Contig001039	['GO:0006897', 'GO:0021517', 'GO:0048513', 'GO:0007268', 'GO:0021541', 'GO:0021766', 'GO:0021819', 'GO:0032793', 'GO:0038026', 'GO:0042981', 'GO:0045088', 'GO:0045860', 'GO:0048813', 'GO:0050731', 'GO:0050804', 'GO:0061003', 'GO:0061098', 'GO:1900006', 'GO:0009410', 'GO:0021987', 'GO:0071363', 'GO:0071397', 'GO:0006508', 'GO:0006629', 'GO:0019221', 'GO:0050878', 'GO:0007417']	10
Contig012371	['GO:0002181', 'GO:0006412', 'GO:0010467']	1
Contig006086	['GO:0044528', 'GO:0008152', 'GO:0010467', 'GO:0010468', 'GO:0016310', 'GO:0000963', 'GO:0006397']	5
Contig001233	['GO:0006281', 'GO:0006289', 'GO:0006974', 'GO:0090304', 'GO:0009411', 'GO:0036297', 'GO:1901255', 'GO:0006289', 'GO:0044238', '', 'GO:0006351', 'GO:0006366', 'GO:0000724', 'GO:0006283', 'GO:0006285', 'GO:0008340', 'GO:0009650', 'GO:0010225', 'GO:0035264', 'GO:0043066', 'GO:0050790', 'GO:0009416', 'GO:0032259', 'GO:0006397', 'GO:0007049', 'GO:0031145', 'GO:0051301', 'GO:0070914']	17
Contig000859	['GO:0006811', 'GO:0033198', 'GO:0035590', 'GO:0060079', 'GO:0098655', 'GO:0050848', 'GO:0051480', 'GO:0071294', 'GO:0071407', 'GO:1901698', 'GO:0006812', 'GO:0006816', 'GO:0008217', 'GO:0010524', 'GO:0010614', 'GO:0019722', 'GO:0034220', 'GO:0034405', 'GO:0043536', 'GO:0050850', 'GO:0051899', 'GO:0055117', 'GO:0055119', 'GO:0070588', 'GO:0071318', 'GO:0097190', 'GO:2001028', 'GO:0007204', 'GO:00…	23
Contig009918	['GO:0007186', 'GO:0007601', 'GO:0007602', 'GO:0050896', 'GO:0009584', 'GO:0071482', 'GO:0016037', 'GO:0009416']	7
Contig013466	['GO:0007186', 'GO:0007596', 'GO:0070493', 'GO:0042060', 'GO:0035025', 'GO:0007200', 'GO:0002009', 'GO:0008283', 'GO:0002286', 'GO:0002573', 'GO:0002685', 'GO:0003093', 'GO:0007200', 'GO:0008015', 'GO:0009968', 'GO:0010468', 'GO:0010628', 'GO:0010629', 'GO:0051897', 'GO:0030193', 'GO:0030335', 'GO:0032757', 'GO:0032880', 'GO:0032930', 'GO:0032956', 'GO:0034121', 'GO:0034122', 'GO:0035023', 'GO:00…	31
Contig000681	['GO:0006357', 'GO:0042127', 'GO:0045944', 'GO:2001224', 'GO:2000291', 'GO:0007517', 'GO:0033089', 'GO:0030335']	5
Contig012559	['GO:0006656', 'GO:0006657', 'GO:0006663', 'GO:0008654', 'GO:0006646', 'GO:0006629', 'GO:0001558']	5
Contig015667	['GO:0019290', '', 'GO:0042168', 'GO:0042541', 'GO:0043249', 'GO:0006066', 'GO:0006629', 'GO:0006635', 'GO:0030855', 'GO:0042182', 'GO:0046164', 'GO:1901615', 'GO:0044237', '']	4
Contig004566	[]	0
Contig012275	['GO:0031017', 'GO:0006357', 'GO:0030182', 'GO:0002071', 'GO:0006851', 'GO:0007030', 'GO:0007186', 'GO:0007267', 'GO:0010832', 'GO:0019722', 'GO:0030968', 'GO:0042149', 'GO:0042593', 'GO:0045944', 'GO:0048312', 'GO:0051649', 'GO:0072560', 'GO:0006355', 'GO:0048469']	12
Contig003094	['GO:0007026', 'GO:0000281', 'GO:0045944', 'GO:0006915', 'GO:0007049', 'GO:0051301', 'GO:0051493', 'GO:0000278', 'GO:0061640']	6
Contig009510	['GO:0007186', 'GO:0007217', 'GO:0006936', 'GO:0045987', 'GO:1902093', 'GO:0070472', 'GO:0014057', 'GO:0014827', 'GO:0033685', 'GO:0035106', 'GO:0043117', 'GO:0043270', 'GO:0051602', 'GO:0070459', 'GO:0070474', 'GO:0007218', 'GO:0006937', 'GO:1901317', 'GO:0018108']	6
Contig005482	['GO:0010719', 'GO:0045944', 'GO:0010717']	2
Contig014470	['GO:0001522', 'GO:0008033', 'GO:0009451', 'GO:0031119', 'GO:1990481', 'GO:0008152', 'GO:0006397', 'GO:0008380', 'GO:0045944', 'GO:0010467']	7
Contig000474	['GO:0043254', 'GO:0006887', 'GO:0006893', 'GO:0035493', 'GO:0035542', 'GO:0045920', 'GO:0098609']	3
Contig005525	['GO:0019511', 'GO:0032963', 'GO:0008285', 'GO:0032964', 'GO:0017185', 'GO:0042127']	3
Contig009408	['GO:0008652', 'GO:0009086', 'GO:0019284', 'GO:0019509']	3
Contig011184	[]	0
Contig011046	[]	0
Contig014469	['GO:0006468', 'GO:0006914', 'GO:0000045', 'GO:0000422', 'GO:0010508', 'GO:0018105', 'GO:0034727', 'GO:0042594', 'GO:0044804', 'GO:0048671', 'GO:0048675', 'GO:0061709', 'GO:0016310', 'GO:0016237', 'GO:0019222', 'GO:0031669', 'GO:0046777', 'GO:0051179', 'GO:0008104', 'GO:0008285', 'GO:0016236', 'GO:0016241', 'GO:0018107', 'GO:0031175', 'GO:0031333', 'GO:1903059', 'GO:0007409', 'GO:0000423', 'GO:00…	17
Contig008846	['GO:0032933', 'GO:0034976', 'GO:0043161', 'GO:0046890', 'GO:1901698', 'GO:0006629', 'GO:0008202', 'GO:0008203', 'GO:0036503', 'GO:0045541', 'GO:0045717', 'GO:0045540', 'GO:0006508', '', 'GO:0006511']	8
Contig002808	['GO:0001522', 'GO:0006396', 'GO:0006400', 'GO:0008033', 'GO:0009451', 'GO:1990481', 'GO:0008152', 'GO:1903798', 'GO:0010467', 'GO:2000633', 'GO:0016070', 'GO:0006397', 'GO:0010468']	8
Contig011880	['GO:1905515', 'GO:0060271']	2
Contig013792	['GO:0034453']	1
Contig009150	['GO:0006886', 'GO:0010628', 'GO:0010821', 'GO:0015031', 'GO:0031647', 'GO:0032456', 'GO:0036010', 'GO:0042147', 'GO:0043653', 'GO:0045056', 'GO:0045732', 'GO:0050728', 'GO:0060161', '', 'GO:0090141', 'GO:0099074', 'GO:0099639', '', 'GO:1902823', 'GO:1902950', 'GO:2000331', 'GO:0019222', 'GO:0019538', 'GO:0032880', 'GO:0043170', 'GO:0051963', 'GO:0060341', 'GO:0061357', 'GO:0099003', 'GO:1903539'…	17
Contig009704	['GO:0002357', 'GO:0006622', 'GO:0006919', 'GO:0012502', 'GO:0031398', 'GO:0032689', 'GO:0032703', 'GO:0032735', 'GO:0043410', 'GO:0050860', 'GO:0050868', 'GO:0050869', 'GO:0060907', 'GO:0090160', 'GO:0097214', 'GO:1901224', 'GO:1903265', 'GO:1904093', 'GO:2000060', 'GO:2000646', 'GO:0002720', 'GO:0006886', 'GO:0032755', 'GO:0046007', 'GO:0061462', 'GO:0140646', 'GO:1903052', 'GO:1990830', 'GO:00…	7
Contig003262	[]	0
Contig010337	['GO:0006355', 'GO:0007219', 'GO:0045765', 'GO:0060218', 'GO:1905517', 'GO:0007275', 'GO:0010628', 'GO:0019222', 'GO:0030154', 'GO:0071456', 'GO:0001666', 'GO:0001755', 'GO:0008045', 'GO:0009749', 'GO:0045892', 'GO:0051402', 'GO:0006357', 'GO:0000302', 'GO:0001525', 'GO:0001568', 'GO:0001678', 'GO:0001837', 'GO:0001922', 'GO:0001944', 'GO:0001947', 'GO:0002052', 'GO:0002062', 'GO:0002067', 'GO:00…	35
Contig006772	['GO:0002088', 'GO:0007601', 'GO:0001654']	2
Contig012161	['GO:0007015', 'GO:0000902', 'GO:0051017', 'GO:0045176', 'GO:0001843', 'GO:0002064', 'GO:0030950', 'GO:0042249', 'GO:0090251', 'GO:0001841', 'GO:0002009', 'GO:0007164', 'GO:0009888', 'GO:0032401', 'GO:0030036']	6
Contig007454	[]	0
Contig006192	['GO:0006468', 'GO:0006915', 'GO:0035556', 'GO:0043065', 'GO:0016310', 'GO:0043276', 'GO:0090023', 'GO:2000424', 'GO:2001242', 'GO:1990266', 'GO:0010506', 'GO:0042981', 'GO:0046777']	6
Contig012983	['']	0
Contig012110	['GO:0007155', 'GO:0007411', 'GO:0007156', 'GO:0070593', 'GO:0030182', 'GO:0016477', 'GO:0030036', 'GO:0048666', 'GO:0098609', 'GO:0007519', 'GO:0007626', 'GO:0030239', 'GO:0060047']	8
Contig013733	[]	0
Contig014257	['GO:0000165', 'GO:0008543', 'GO:0010966', 'GO:0010980', 'GO:0030500', 'GO:0030502', 'GO:0030643', 'GO:0042369', 'GO:0045668', 'GO:0045893', 'GO:0055062', 'GO:0055074', 'GO:0070371', 'GO:0070374', 'GO:0090080', 'GO:1904383', 'GO:0001934', 'GO:0008284', 'GO:0009887', 'GO:0010628', 'GO:0030154', 'GO:0030334', 'GO:0046888', 'GO:0006796', 'GO:0032026', 'GO:0042359', 'GO:0044320', 'GO:0071305', 'GO:00…	11
Contig015683	['GO:0006665', 'GO:0006686', 'GO:0046513', 'GO:1905373', 'GO:0030500', 'GO:0006629', 'GO:0016310']	4
Contig011498	['GO:0006508', 'GO:0006511', 'GO:0016579', 'GO:0030163', 'GO:0007628', 'GO:0032869', 'GO:0042755', 'GO:0045600', 'GO:0060041']	3
Contig007593	['GO:0006596', 'GO:0006597', 'GO:0008215', 'GO:0006555', 'GO:0006595']	3
Contig001904	['GO:0000381', 'GO:0048024', 'GO:0006397', 'GO:0033120', 'GO:0030154', 'GO:0051028', 'GO:0010468']	5
Contig011761	['GO:0006974', 'GO:0042407', 'GO:0007007', 'GO:0007005']	3
Contig015403	['GO:0006398', 'GO:0051028', 'GO:0010467', 'GO:0002191', 'GO:0006397', 'GO:0003407', 'GO:0030182', 'GO:0031290', 'GO:0046530', 'GO:0048854']	5
Contig004563	['GO:0000226', 'GO:0045494', 'GO:1903546', 'GO:1903621', 'GO:0007601', 'GO:0050896', 'GO:0008104']	4
Contig001812	['GO:0006468', 'GO:0006974', 'GO:0010468', 'GO:0018105', 'GO:0051726', 'GO:0016055', 'GO:0016310', 'GO:0018107', 'GO:1905818', 'GO:2000059', 'GO:0006355', 'GO:0006356', 'GO:0010564', 'GO:2000058', 'GO:0006359', 'GO:0006915', 'GO:0007049', 'GO:0007283', 'GO:0021987', 'GO:0097421', 'GO:1903146', 'GO:1903955', 'GO:2001234', 'GO:0042177']	9
Contig014317	['GO:0046629', 'GO:0050900', 'GO:0001775', 'GO:0016477', 'GO:0002052', 'GO:0007283', 'GO:0007405', 'GO:0061351', 'GO:2000179', 'GO:0002446', 'GO:0006468', 'GO:0007169', 'GO:0007399', 'GO:0010976', 'GO:0051897', 'GO:0016310', 'GO:0018108', 'GO:0030154', 'GO:0033674', 'GO:0038180', 'GO:0042742', 'GO:0051896', 'GO:0090594', 'GO:1990090', 'GO:0038179', 'GO:0001934', 'GO:0008285', 'GO:0010975', 'GO:00…	28
Contig006894	['GO:0016567', 'GO:0071596', 'GO:0007275', 'GO:0048592', 'GO:0043161', 'GO:0007600', 'GO:0048856', 'GO:0045732', 'GO:1904878', 'GO:0001701', 'GO:0001967', 'GO:0006511', 'GO:0007608', 'GO:0009792', 'GO:0042048', 'GO:0006508', 'GO:0050877', 'GO:0043066', 'GO:0045880', 'GO:0051865', 'GO:0070936', 'GO:0007605']	8
Contig001800	['GO:0006811', 'GO:1902600', 'GO:0030282', 'GO:0043473', 'GO:0048069', 'GO:0060041', 'GO:0060348', 'GO:0061075', 'GO:0006897', 'GO:0032502', 'GO:0097401', 'GO:0007035', 'GO:0007042', 'GO:0016241', 'GO:0048388', 'GO:0050790', 'GO:0051452', 'GO:0061795', 'GO:0045851']	7
Contig011691	['GO:0043161', 'GO:0050790', 'GO:0006508']	2
Contig014399	['GO:0000165', 'GO:0006468', 'GO:0016310', 'GO:0035556']	3
Contig009855	['GO:0007264', 'GO:0050790', 'GO:0035556']	2
Contig003476	['GO:0008589']	0
Contig003640	['GO:0006629', 'GO:0016042', 'GO:0035556', 'GO:0048015', 'GO:0050804', 'GO:0043267', 'GO:0007420', 'GO:0051726', '', 'GO:0001580', 'GO:0002385', 'GO:0007602', 'GO:0007623', 'GO:0008344', 'GO:0009649', 'GO:0016056', 'GO:0016059', 'GO:0043052', 'GO:0043153', 'GO:0045494', 'GO:0046488', 'GO:0046673', 'GO:0071482', 'GO:2000370', 'GO:0006644', 'GO:0006651', 'GO:0007601', 'GO:0030265', 'GO:0008654', 'G…	23
Contig002904	['GO:0007049', 'GO:0007088', 'GO:0051983', 'GO:0006412', 'GO:0006414', 'GO:0032790', 'GO:0006417', 'GO:0005986', 'GO:0005985', 'GO:0006355', 'GO:0006357', 'GO:0006468', 'GO:0016310', 'GO:0009653', 'GO:0030154', 'GO:0048731', 'GO:0007369', 'GO:0045893', 'GO:0006351', 'GO:0010719', 'GO:0030193', 'GO:0031018', 'GO:0043433', 'GO:0045944', 'GO:0071542', 'GO:0048646', 'GO:0006325', 'GO:0000432', 'GO:00…	25
Contig005964	['GO:0032008', 'GO:0050790', 'GO:0071230', 'GO:0008104', 'GO:0040008', 'GO:0043200', 'GO:0032006', 'GO:0001558', 'GO:0150116', 'GO:0010761', 'GO:0043410', 'GO:1902414', 'GO:0038202', '']	5
Contig004056	['GO:0001525', 'GO:0009888', 'GO:0001501', 'GO:0030198', 'GO:0030199', 'GO:0030903', 'GO:0001886', 'GO:0016203', 'GO:0031101', 'GO:0035124', 'GO:0035143', 'GO:0048514', 'GO:0035821']	5
Contig007978	['GO:0007317', 'GO:0007400', 'GO:0007402', 'GO:0007405', 'GO:0007419', 'GO:0008595', 'GO:0030162', 'GO:0045167', 'GO:0048477', 'GO:0055059', 'GO:0072697', 'GO:1904580', 'GO:0032259', 'GO:0006412', 'GO:0016539']	4
Contig006899	['GO:0006468', 'GO:0006886', 'GO:0007059', 'GO:0018105', 'GO:0035556', 'GO:1902275', 'GO:0016310', 'GO:0006325', 'GO:0006974', 'GO:0007049']	7
Contig014172	['GO:0007005', 'GO:0008053', 'GO:0051646', 'GO:0051641', 'GO:0010918', 'GO:0046039', 'GO:0010636', 'GO:0048312', 'GO:0061003', 'GO:0007005', 'GO:0090258']	4
Contig005587	['GO:0031638', 'GO:0006355']	1
Contig000428	['GO:0048583', 'GO:0009968', 'GO:0030947', 'GO:0043537', 'GO:0050680', 'GO:0090049', 'GO:0030948', 'GO:0090051', 'GO:1903588', 'GO:1905278', 'GO:0002042', 'GO:0008285', 'GO:0030336', 'GO:1900426', 'GO:1905332', 'GO:0001525', 'GO:0007155', 'GO:0010594', 'GO:0042127']	6
Contig012318	['GO:0035108', 'GO:0045944', 'GO:0060173']	1
Contig013352	['GO:0007155', 'GO:0070830', 'GO:0016338']	2
Contig015061	['GO:0016075', '', 'GO:0006396', '', 'GO:0008152', 'GO:0010467', 'GO:0006401', 'GO:0016070', 'GO:0016070', '']	5
Contig006613	['GO:0006417', 'GO:0007399', 'GO:0010468', 'GO:0010610', 'GO:0017148', 'GO:0022013', 'GO:0051028', 'GO:0051252', 'GO:0070934', 'GO:0097150', 'GO:1900152', 'GO:2000767', 'GO:0006403', 'GO:0140059', 'GO:0001817', 'GO:0010628', 'GO:0010629', 'GO:0045727']	8
Contig003504	['GO:0015031', 'GO:0006887', 'GO:0016192', 'GO:0035556', 'GO:0008089', 'GO:0008104', 'GO:0098930', 'GO:0007049', 'GO:0007059', 'GO:0051301', 'GO:0048731', 'GO:0051649', 'GO:0000819', 'GO:0001666', 'GO:0007269', 'GO:0032418', 'GO:0061909', 'GO:0099054', 'GO:1902774', 'GO:0007009', 'GO:0008333', 'GO:0009987', 'GO:0015918', 'GO:0016032', 'GO:0042060', 'GO:0045055', 'GO:0045087', 'GO:0090385']	15
Contig000346	['GO:0048513', 'GO:0002009', 'GO:0007275', 'GO:0007399', 'GO:0048598', 'GO:0051649', 'GO:0000132', 'GO:0001755', 'GO:0001764', 'GO:0001947', 'GO:0003407', 'GO:0016055', 'GO:0021535', 'GO:0031175', 'GO:0035622', 'GO:0042074', 'GO:0060027', 'GO:0070121', 'GO:0071907', 'GO:0071910', 'GO:0001843', 'GO:0006606', 'GO:0009410', 'GO:0016358', 'GO:0031398', 'GO:0032436', 'GO:0035904', 'GO:0045892', 'GO:00…	27
Contig009034	['GO:0055085', 'GO:0001951', 'GO:0015824', 'GO:0035623', 'GO:0000017', '', 'GO:0015757', 'GO:0035377', 'GO:0098708', 'GO:0098719', 'GO:0150104', 'GO:1904659', 'GO:0001656', 'GO:0006811', 'GO:0006814', 'GO:0008643', 'GO:0032409', 'GO:0050892', 'GO:0015750', 'GO:0015756', 'GO:0015798', 'GO:0035725']	5
Contig013477	['GO:0042254', 'GO:0000462', 'GO:0000479', 'GO:0000461', 'GO:0006525', 'GO:0006526', 'GO:0008152', 'GO:0006364', 'GO:0000027', 'GO:0090304', '', 'GO:0010467', '', 'GO:0042274', 'GO:0006606', 'GO:0044238']	12
Contig011937	['GO:0007186', 'GO:0007268', 'GO:0032098', 'GO:0098664', 'GO:0071880', 'GO:0007189', 'GO:0007193', 'GO:0007210', 'GO:0031667', 'GO:0007187', 'GO:0007198', 'GO:0007214', 'GO:1903351']	6
Contig008644	['GO:0031018']	0
Contig005761	['GO:0009888', 'GO:0031214', 'GO:0031215', 'GO:0001501', 'GO:0030282', 'GO:0030502', 'GO:0000226', 'GO:0045494', 'GO:1903546', 'GO:1903621', 'GO:0007601', 'GO:0050896', 'GO:0008104', 'GO:0016310', 'GO:0032259']	8
Contig012135	['GO:0006357', 'GO:0000209', 'GO:0050767', 'GO:0050769', 'GO:0051865', 'GO:0060395', 'GO:1990138', 'GO:0001558', 'GO:0006275', 'GO:0006355', 'GO:0016567', '', '', '', '', '', 'GO:0051726', 'GO:2000278']	8
Contig013115	['GO:0006955', 'GO:0060326', 'GO:0002548', 'GO:0006954', 'GO:0007186', 'GO:0030335', 'GO:0030593', 'GO:0034097', 'GO:0043410', 'GO:0045087', 'GO:0048247', 'GO:0070555', 'GO:0043547', 'GO:0070098', 'GO:0070374', 'GO:0071346', 'GO:0071347', 'GO:0071356', 'GO:0008015', 'GO:0048513', 'GO:0051216', 'GO:0007275', 'GO:0048856', 'GO:0001525', 'GO:0001938', 'GO:0002092', 'GO:0007171', 'GO:0007173', 'GO:00…	20
Contig014757	['GO:0010951', 'GO:0006811', 'GO:0009792', 'GO:0032570', 'GO:0043627', 'GO:0048545', 'GO:0050801', 'GO:0051412', 'GO:0080144']	2
Contig013124	['GO:0032101', 'GO:0042060', 'GO:0070527', 'GO:0030308', 'GO:0030522']	2
Contig003648	['GO:0030030']	1
Contig006126	['GO:0055088']	0
Contig012090	['GO:0006691', 'GO:0019370', 'GO:0050790', 'GO:0042759', 'GO:0098869', 'GO:0006629', 'GO:0009410', '', 'GO:0032496', 'GO:0048678', 'GO:0071222', 'GO:0071299']	7
Contig003690	['GO:0000183', 'GO:0000122', '', '', 'GO:0019222', '', 'GO:0051260', '', '', '', 'GO:0031507', 'GO:1990700', '', '', '', '', '', 'GO:1903580', 'GO:0006325', 'GO:0051259', 'GO:0010629', '']	8
Contig009654	['GO:0030036', 'GO:0007015', 'GO:0061061', 'GO:0099536', 'GO:0001954', 'GO:0007267', 'GO:0051017', 'GO:0007527', 'GO:0006936', 'GO:0007517', 'GO:2000649']	6
Contig013436	['GO:0000902', 'GO:0007507', 'GO:0031175', 'GO:0030182']	4
Contig010607	['GO:0033365', 'GO:0070507', 'GO:0072393', 'GO:0000226', 'GO:0007018', 'GO:0008104', 'GO:0046907', 'GO:0048193', 'GO:0051493', 'GO:0051641', 'GO:0061842', 'GO:0006890', 'GO:0034067', 'GO:0051642', 'GO:0072385', 'GO:0015031', 'GO:0051028', 'GO:0050790']	9
Contig000797	['GO:0006281', 'GO:0006307', '', 'GO:0008152', 'GO:0070989', '', 'GO:0006974', '']	4
Contig003034	['GO:0030490', 'GO:0045893', 'GO:1901836', 'GO:0006364', 'GO:1901838', 'GO:0042254', 'GO:0045943', 'GO:0010467']	5
Contig013358	['GO:0006629', 'GO:0016042', 'GO:0019695', 'GO:0035821']	3
Contig013159	['GO:0000209', 'GO:0001967', 'GO:0007566', 'GO:0007617', 'GO:0009566', 'GO:0016567', 'GO:0061458', 'GO:0070459', 'GO:0070936']	3
Contig008447	['GO:0006412', 'GO:0006414', 'GO:0070125', 'GO:0032790', 'GO:0032543', 'GO:0006413', 'GO:0006508', 'GO:1903008', 'GO:0010467', 'GO:0010468', 'GO:0006417', 'GO:0006996', 'GO:0009987']	8
Contig003873	['GO:0051493', 'GO:0042989', 'GO:0008104', 'GO:0032956', 'GO:0051641', 'GO:0006739']	2
Contig004586	['GO:0016192', 'GO:0050790', 'GO:0002090', 'GO:0002685', 'GO:0030336', 'GO:0045806', 'GO:0002091', 'GO:0060755', 'GO:0097494', 'GO:0006897']	3
Contig007079	['GO:0030036', 'GO:0045214', 'GO:0060537', 'GO:0051017', 'GO:0030154', 'GO:0007015', 'GO:0009888']	6
Contig003945	['', 'GO:0032259', 'GO:0006357', 'GO:0045944', '', 'GO:0008593', 'GO:0035776', 'GO:0035777', 'GO:0048701', 'GO:0048702', 'GO:0048703', 'GO:0048793', 'GO:0072196', 'GO:0098508', 'GO:1903251', 'GO:0043069', 'GO:0045892', 'GO:0045893', 'GO:0046329', 'GO:0051726', 'GO:0001701', 'GO:0001780', 'GO:0006954', 'GO:0009617', 'GO:0009791', 'GO:0030900', 'GO:0035115', 'GO:0035116', 'GO:0042127', 'GO:0060039'…	8
Contig005208	['GO:0030308', 'GO:0045926', 'GO:0051321', 'GO:0001558']	3
Contig012968	['GO:0006508', 'GO:0010468', 'GO:0006355', 'GO:0010829', 'GO:0045920', 'GO:0032243', 'GO:0042997', 'GO:0051051', 'GO:0050892', 'GO:1903077', 'GO:0010498', 'GO:0016485', 'GO:0031647', 'GO:0072711', 'GO:0097752', 'GO:0007193', 'GO:0009966', 'GO:0009967', 'GO:0006325', '', 'GO:0032259', 'GO:0045944', 'GO:0007017']	11
Contig001531	['GO:0007040', 'GO:0008104', 'GO:0032510', 'GO:0042267', 'GO:0043473', 'GO:0002446', 'GO:0002456', 'GO:0006644', 'GO:0007017', 'GO:0007596', 'GO:0009410', 'GO:0030595', 'GO:0032438', 'GO:0032816', 'GO:0033299', 'GO:0033364', 'GO:0042742', 'GO:0042832', 'GO:0048753', 'GO:0051607', 'GO:0055091', 'GO:0071621', 'GO:0006909', 'GO:0015031']	9
Contig004678	['GO:0006281', 'GO:0000722', 'GO:0045003', 'GO:0071140', 'GO:0090656', 'GO:0000724', 'GO:0008152', 'GO:0007088', 'GO:0009966', 'GO:0010564', 'GO:0045787', 'GO:0051321', 'GO:0065003', 'GO:0090304', 'GO:0010824', 'GO:0036297', 'GO:0090267', 'GO:0090737', 'GO:0000730', 'GO:0042148', 'GO:0006310', 'GO:0006974', '', 'GO:0090304', 'GO:0090657', 'GO:0022414', 'GO:0051726', 'GO:0090266', 'GO:0006139', 'G…	21
Contig002029	['GO:0006468', 'GO:0043066', 'GO:0044344', 'GO:0045743', 'GO:0048568', 'GO:0060036', 'GO:0070374', 'GO:0019222', 'GO:0016310', 'GO:0018108', 'GO:0033674', 'GO:0042327', 'GO:0043410', 'GO:0043549']	5
Contig006570	['GO:0060998', 'GO:0061001', 'GO:0099519', 'GO:0001701']	0
Contig003926	['GO:0051013', 'GO:0000226', 'GO:0031122', 'GO:0051321']	3
Contig011084	['GO:0006909', 'GO:0006915', 'GO:0007010', 'GO:0016477', 'GO:0098609', 'GO:0007015', 'GO:0048870', 'GO:0006935', 'GO:0060326', 'GO:0007155', 'GO:0030036']	8
Contig008518	['GO:0015807', 'GO:0098656', 'GO:1902475', 'GO:0006835', 'GO:0070778', 'GO:0001504', 'GO:0015813', 'GO:0042391', 'GO:0051649', 'GO:0098712', 'GO:0140009', 'GO:0015800', 'GO:0055085', 'GO:0006865', 'GO:0015804', 'GO:0015711', 'GO:0098655', 'GO:0007268', 'GO:0015810', 'GO:0035725']	8
Contig012532	['GO:0050790']	0
Contig014107	['GO:0007186', 'GO:0007218', 'GO:0007200', 'GO:0007631', 'GO:0051384']	3
Contig008714	['GO:0003341', 'GO:0060271', 'GO:0060287', 'GO:0007368', 'GO:0030317', 'GO:0051649', 'GO:0090660', 'GO:0120229', 'GO:0003351']	3
Contig011212	['GO:0045056', 'GO:0042552', 'GO:0016192', 'GO:0007399']	3
Contig000590	['GO:0032496', 'GO:0034142', 'GO:0071624', 'GO:0090026', 'GO:0042742', 'GO:0006915', 'GO:0055074', 'GO:0030335', 'GO:0002523', 'GO:0002544', 'GO:0014002', 'GO:0018119', 'GO:0030593', 'GO:0035425', 'GO:0045113', 'GO:0061844', 'GO:0070488', 'GO:0006914', 'GO:0006919', 'GO:0035606', 'GO:0035821', 'GO:0050729', 'GO:2001244', 'GO:0002790', 'GO:0002793', 'GO:0006417', 'GO:0030194', 'GO:0030595', 'GO:00…	22
Contig015974	['GO:0030154', 'GO:0035023', 'GO:0010468', 'GO:0033292', 'GO:0048741', 'GO:0045944', 'GO:0007266', 'GO:0007517', 'GO:0050790', 'GO:0055003']	7
Contig011941	['GO:0016567', 'GO:0036211', 'GO:0043170', 'GO:0032526', 'GO:0032731', '', '', 'GO:0045618', 'GO:0045893', 'GO:0046683', 'GO:0048386', 'GO:0060416', 'GO:0035821']	5
Contig012020	['GO:0007399', 'GO:0010466', 'GO:0010951', 'GO:0030154', 'GO:1900004', 'GO:0007417', 'GO:1902572', 'GO:0006508']	3
Contig011876	['GO:0007156', 'GO:0098609', 'GO:0032532', 'GO:0090675', 'GO:0007155', 'GO:0030154', 'GO:0000902', 'GO:0001738', 'GO:0002064', 'GO:0007163', 'GO:0030036', 'GO:0048593', 'GO:0048513', 'GO:0048793', 'GO:0061386', 'GO:0048856', 'GO:0007275', 'GO:0072006', 'GO:0072137', 'GO:0002040', 'GO:0098742', 'GO:0007605', 'GO:0007626', 'GO:0060122']	10
Contig008089	['GO:0006397', '', 'GO:0016554', 'GO:0045087', 'GO:0045869', 'GO:0051607', 'GO:0070383', '', 'GO:0016553', 'GO:0002376', 'GO:0009972', 'GO:0002244', 'GO:0045071', 'GO:0050688', 'GO:1903900', 'GO:0002230', 'GO:0048525', 'GO:0090310', 'GO:0006641', 'GO:0010332', 'GO:0016556', 'GO:0042127', 'GO:0042157', 'GO:0042158', 'GO:0042953', 'GO:0048255', 'GO:0051649', 'GO:0090209', 'GO:2000623', 'GO:0006970'…	20
Contig006277	['GO:0006646', 'GO:0016310', 'GO:0006629', 'GO:0008654']	4
Contig001567	['GO:0006486', 'GO:0019348', 'GO:0050790', 'GO:0006506', 'GO:0006487', 'GO:0006493', 'GO:0006412', 'GO:0006488', 'GO:0006696', 'GO:0009272', 'GO:0097502', 'GO:0061061', 'GO:0006497', 'GO:0006661', 'GO:0006066', 'GO:0044255', 'GO:0031647', 'GO:0035269', 'GO:1901615', 'GO:0016093', 'GO:0006508', 'GO:0030166']	10
Contig009730	['GO:0007169', 'GO:0008543', 'GO:0001702', 'GO:0001759', 'GO:0002088', 'GO:0003281', 'GO:0007405', 'GO:0008595', 'GO:0030900', 'GO:0042981', 'GO:0043410', 'GO:0046619', 'GO:0050678', 'GO:0060527', 'GO:0070307', 'GO:0070372', 'GO:2000726', 'GO:0044344', 'GO:1904707', 'GO:0007185', 'GO:0007186', 'GO:0050790', 'GO:0045595']	6
Contig001203	['GO:0007399', 'GO:0008202', 'GO:1901615', 'GO:0006644', 'GO:0006672', 'GO:0006915', 'GO:0007006', 'GO:0007040', 'GO:0007601', 'GO:0007628', 'GO:0008203', 'GO:0008306', 'GO:0008344', 'GO:0008361', 'GO:0019538', 'GO:0021522', 'GO:0021523', 'GO:0030163', 'GO:0035176', 'GO:0043524', 'GO:0009057', 'GO:0045494', 'GO:0050881', 'GO:0050884', 'GO:0050885', 'GO:0051402', 'GO:0051935', 'GO:0060041', 'GO:00…	17
Contig001712	['GO:0002943', 'GO:0008033', 'GO:0010467']	3
Contig006217	['GO:0007274', 'GO:0048167', 'GO:0048790', 'GO:0050808', 'GO:0016055', 'GO:0048513', 'GO:0006355', 'GO:0007252', 'GO:0051092']	3
Contig007867	['GO:0006811', 'GO:0006816', 'GO:0019226', 'GO:0034765', 'GO:0051968', 'GO:0070588', 'GO:0098943', 'GO:0098970', 'GO:0099590', 'GO:2000311', 'GO:0006355', 'GO:0007528', 'GO:0042391', 'GO:0050877', 'GO:0051899', 'GO:0060081', 'GO:0099072', 'GO:0099645', 'GO:0006612', 'GO:0051592', 'GO:0060082', 'GO:0098962', 'GO:1904510', 'GO:2000969', 'GO:1904062', 'GO:0031623', 'GO:0051966', 'GO:0006897', 'GO:00…	8
Contig004114	['GO:0006338', 'GO:0006357', 'GO:0055113', 'GO:0048598', 'GO:0032502', 'GO:0009888', 'GO:0000122', 'GO:0001764', 'GO:0002076', 'GO:0009880', 'GO:0010468', 'GO:0045944', 'GO:0048704', 'GO:0051216', 'GO:0060021', '', 'GO:0006325', 'GO:0021902']	11
Contig004689	['GO:0006164', 'GO:0006167', 'GO:0044208', 'GO:0046040', 'GO:0046716', 'GO:0048741', 'GO:0006163', 'GO:0006531', 'GO:0009168', 'GO:0044209', 'GO:0006541', 'GO:0014850', 'GO:0042594', 'GO:0071257', 'GO:0071466', 'GO:0002376']	8
Contig006394	[]	0
Contig006348	['GO:0007267', 'GO:0008543', 'GO:0045743', 'GO:0051450', 'GO:0090050', 'GO:1903589', 'GO:2000288', 'GO:0008285', 'GO:0000184', 'GO:0001932', 'GO:0050790', 'GO:0006508', 'GO:0030488', 'GO:0032259', 'GO:0008033', 'GO:0000387', 'GO:0009312', 'GO:0006488', 'GO:0006457', 'GO:0005975', 'GO:0016051', 'GO:0006094']	14
Contig015036	['GO:0006468', 'GO:0000226', 'GO:0030334', 'GO:0042981', 'GO:0016310', 'GO:0031122', 'GO:0046777', 'GO:0051893', 'GO:0051128', 'GO:0006915', '', 'GO:0043065', 'GO:0071346', 'GO:0007155', 'GO:0007156', 'GO:0007166', 'GO:0007186', 'GO:0007214', 'GO:0048856', 'GO:0098609', 'GO:0022008', 'GO:0001764', 'GO:0001932', 'GO:0007413', 'GO:0032880', 'GO:0036514', 'GO:0036515', 'GO:0060271', 'GO:0097475', ''…	20
Contig003884	['GO:0045944']	1
Contig003525	['GO:0006811', 'GO:0006813', 'GO:0034765', 'GO:0051260', 'GO:0055085', 'GO:0071805', 'GO:0019228', 'GO:0019233', 'GO:0045475', 'GO:0060078', 'GO:0001508', 'GO:0071456', 'GO:0086001', 'GO:0007268', 'GO:0051259', 'GO:0034220']	10
Contig010350	['GO:0008360', 'GO:0030036', 'GO:0007010', 'GO:0016043', 'GO:0022604', 'GO:0007015', 'GO:0016477', 'GO:0030866', 'GO:0032956', 'GO:0045010', 'GO:0006508', 'GO:0006515', 'GO:0030163', 'GO:0034605', 'GO:0016485', 'GO:0019216', 'GO:0045184', '', 'GO:0051131', 'GO:0000160', 'GO:0030254', 'GO:0043107', 'GO:0044010', 'GO:0071236', 'GO:0071977', 'GO:0071978', 'GO:0007018', 'GO:0000226', 'GO:0000278', 'G…	37
Contig013114	['GO:0030199', 'GO:0008285', 'GO:0007155']	3
Contig008142	['GO:0007601', 'GO:0008277', 'GO:0009966', 'GO:0050896', 'GO:0007186', 'GO:0007602', 'GO:0043086']	6
Contig015824	['GO:0060271', 'GO:1905515', 'GO:1901622', 'GO:0031069']	2
Contig005140	['GO:0098703', 'GO:1902656', 'GO:0007204']	1
Contig004153	['GO:0035461', 'GO:0051180', '', 'GO:0055085', 'GO:0071934', 'GO:0015888', 'GO:0071705']	3
Contig014624	[]	0
Contig002596	['GO:0006368', 'GO:0006367', 'GO:0019222', 'GO:0019222', 'GO:0006414', 'GO:0016567', 'GO:0045893', 'GO:0045944', 'GO:0032436', 'GO:0065003', 'GO:0006351', 'GO:0006352', 'GO:0006366']	10
Contig000434	['GO:0006879', 'GO:0045893', 'GO:0009725', 'GO:0030218', 'GO:0006622', 'GO:0008584', 'GO:0030520', 'GO:0071391', 'GO:0071394', 'GO:0008104']	4
Contig010620	['GO:0007049', 'GO:0051301', 'GO:0000226', 'GO:0007155', 'GO:0008104', 'GO:0030010', 'GO:0045197', 'GO:0051660', 'GO:0051642']	3
Contig010210	['GO:0009059', 'GO:0044238', 'GO:0006486', 'GO:0016266', 'GO:0006493']	4
Contig010665	['GO:0010467', 'GO:0071840', 'GO:0090304', 'GO:0006397', 'GO:0000388', 'GO:0006401', 'GO:0032502', 'GO:0000398', 'GO:0008380', 'GO:0000354', 'GO:0001649', 'GO:0016070', 'GO:0008152', 'GO:0044238', 'GO:0006508', 'GO:0065003']	12
Contig004649	[]	0
Contig011270	['GO:0009117']	1
Contig005979	['GO:0006457', 'GO:0051085', 'GO:0035082', 'GO:0009408', 'GO:1904158', 'GO:0030030', 'GO:0060271', 'GO:0061077', 'GO:0001578']	7
Contig006278	['GO:0010828', 'GO:0031340', 'GO:0065002', 'GO:0072659', 'GO:0090314', 'GO:0006886', 'GO:0007166', 'GO:0055085', 'GO:0090316', 'GO:1905477', 'GO:0008104', 'GO:0032868', 'GO:0032880', 'GO:0046907', 'GO:0008286', 'GO:0032869', 'GO:0006906', 'GO:0046326', 'GO:0015031', 'GO:0031338', 'GO:0051049', 'GO:0008286']	10
Contig000671	['GO:0006468', 'GO:0007156', 'GO:0007416', 'GO:0010842', 'GO:0016310', 'GO:0055013', 'GO:0007507', 'GO:0055007', 'GO:0009888', 'GO:0055001', 'GO:0048738']	5
Contig006282	['GO:0006813', 'GO:0055085', 'GO:0008016', 'GO:0071805', 'GO:0033198', 'GO:0045776', 'GO:0051607', 'GO:0061337', 'GO:0086003', 'GO:1903760', 'GO:0098655', 'GO:0098662', 'GO:1990573', 'GO:0015698', 'GO:0150104']	9
Contig014258	['GO:0001934', 'GO:0008284', 'GO:0008543', 'GO:0009887', 'GO:0010628', 'GO:0030154', 'GO:0030334', 'GO:0001502', 'GO:0045445', 'GO:0001525', 'GO:0051781', 'GO:0044344', 'GO:0042127']	7
Contig012284	['GO:0006468', 'GO:0070166', 'GO:0034505', 'GO:0046777', 'GO:0016310', 'GO:0031214', 'GO:0001501', 'GO:0030501', 'GO:0036179', 'GO:0040036', 'GO:0045669', 'GO:0051174', 'GO:0071895', 'GO:0097187', 'GO:0046034', 'GO:0009888']	4
Contig009255	['GO:0007018', 'GO:0007411', 'GO:0030705', 'GO:0048489', 'GO:0098971', 'GO:0048731', 'GO:0007275', 'GO:0008090', 'GO:0035418', 'GO:0042391', 'GO:0045087', 'GO:0046907', 'GO:0047496', 'GO:0051641', 'GO:0051649', 'GO:0061842', 'GO:0098930', 'GO:1903008', 'GO:1903076', 'GO:0007281', 'GO:0007519', 'GO:0051216', 'GO:0060349', 'GO:0007028', 'GO:0032230', 'GO:0032418', 'GO:0035617', 'GO:0042267', 'GO:00…	14
Contig009326	['GO:0015914', 'GO:0034204', 'GO:0006890', 'GO:0006897', 'GO:0045332', 'GO:0048193']	4
Contig005847	['GO:0032956', 'GO:0051056', 'GO:0110020', 'GO:0030833', 'GO:0051497', 'GO:1904425', 'GO:0050790', 'GO:0051493']	3
Contig014680	['GO:0007166', 'GO:0007186', 'GO:0007188', 'GO:0009755', 'GO:0060291', 'GO:0071376', 'GO:0009725', 'GO:0009653', 'GO:0048731', 'GO:0007015', 'GO:0007200', 'GO:0010460', 'GO:0010628', 'GO:0010629', 'GO:0010700', 'GO:0014064', 'GO:0016525', 'GO:0019233', 'GO:0030855', 'GO:0032755', 'GO:0032811', 'GO:0032874', 'GO:0033685', 'GO:0035482', 'GO:0042423', 'GO:0043950', 'GO:0045777', 'GO:0046882', 'GO:00…	13
Contig013362	['GO:0000038', 'GO:0001676', 'GO:0006629', 'GO:0006631', 'GO:0008610', 'GO:0015908', 'GO:0033211', 'GO:0035338', 'GO:0044539', 'GO:0071902', 'GO:0120162', 'GO:0015909', 'GO:0007584', 'GO:0009410', '', 'GO:0010747', 'GO:0014070', 'GO:0019432', 'GO:0034201', 'GO:0042178']	8
Contig012808	['GO:0015031', 'GO:0016192', 'GO:0019752', '']	3
Contig006168	['GO:0006660', 'GO:0010842', 'GO:0036269', 'GO:0042552', 'GO:0043010', 'GO:0048899', 'GO:0048919', 'GO:0052651', 'GO:0098734', 'GO:0007626', 'GO:0044255', 'GO:0006629', 'GO:0009395', 'GO:0046464', 'GO:0002084', 'GO:0007628', 'GO:0010996', 'GO:0046475', 'GO:0050727']	6
Contig012964	['GO:0007017', 'GO:0007018', 'GO:0016192', 'GO:0031503', 'GO:0098971', 'GO:0030030', 'GO:0015031', 'GO:0042073', 'GO:1901673', 'GO:0009987']	6
Contig005206	['GO:0006468', 'GO:0031349', 'GO:0032103', 'GO:0042981', 'GO:0043123', 'GO:0070887', 'GO:0048583', 'GO:0001934', 'GO:0002221', 'GO:0002224', 'GO:0002250', 'GO:0002253', 'GO:0007249', 'GO:0010628', 'GO:0016485', 'GO:0019222', 'GO:0031398', 'GO:0035556', 'GO:0042742', 'GO:0043065', 'GO:0045087', 'GO:0051092', 'GO:1901698', 'GO:0016310', 'GO:0002376', 'GO:0018108', 'GO:0000165', 'GO:0006355', 'GO:00…	30
Contig000282	['GO:0001525', 'GO:0030154', 'GO:0048014', 'GO:0001568', 'GO:0010467', 'GO:0032835', 'GO:0043537', 'GO:0010812', 'GO:0016525', 'GO:0048514', 'GO:0050928', 'GO:0072012', 'GO:0001666', 'GO:0001974', 'GO:0007169', 'GO:0007281', 'GO:0007492', 'GO:0009314', 'GO:0009612', 'GO:0009749', 'GO:0014070', 'GO:0014823', 'GO:0030097', 'GO:0031100', 'GO:0045765', 'GO:0045766', 'GO:0060135', 'GO:0071363', 'GO:20…	15
Contig008588	[]	0
Contig008949	['GO:0031623', 'GO:0034097', 'GO:0042632', 'GO:0048661', 'GO:1903076', 'GO:0006898', 'GO:0034383', 'GO:0042982', 'GO:0043393', 'GO:0048260', 'GO:0071345', 'GO:0090118', 'GO:1904707', 'GO:1905581', 'GO:1905602', 'GO:0008284', 'GO:0048259', 'GO:0006629', 'GO:0006897', 'GO:0008202', 'GO:0008203', 'GO:0030301', 'GO:0090205', 'GO:0032880', 'GO:0042127']	10
Contig007176	['GO:0032007', 'GO:0034198', 'GO:0009653', 'GO:0010508', 'GO:0038202', 'GO:1904262', 'GO:0003281', 'GO:0035909', 'GO:0048738', 'GO:0050790', 'GO:0060021', 'GO:0009267', 'GO:0031929']	7
Contig000178	['GO:0006559', 'GO:0006572', 'GO:0009072', 'GO:1902000', 'GO:0006558', 'GO:0008152', 'GO:0018958', 'GO:0009056', 'GO:0032787', 'GO:0042537', 'GO:0046395', 'GO:0006527', 'GO:0006629', 'GO:1901615', 'GO:0006520', 'GO:0044248', 'GO:0044281', 'GO:0006082', '']	5
Contig001946	['GO:0016567', 'GO:0045893', 'GO:0017015', 'GO:0030514', 'GO:0010467', 'GO:0002376', 'GO:0006914', 'GO:0045087', 'GO:0051607', 'GO:0045892']	7
Contig015487	['GO:0006486', 'GO:0018279', 'GO:0043687', 'GO:0006487', 'GO:0006516', 'GO:0006986', 'GO:0036503', 'GO:0043686']	5
Contig008615	[]	0
Contig011531	[]	0
Contig005291	['GO:0006629', 'GO:0008654', 'GO:0006654', 'GO:0001819', 'GO:0001961', 'GO:0006644', 'GO:0016024']	5
Contig013940	['GO:0007160', 'GO:0007368', 'GO:0009887', 'GO:0009888', 'GO:0042074', 'GO:0055113', 'GO:0060972', 'GO:0003143', 'GO:0010468', 'GO:0030326', 'GO:0030509', 'GO:0048562', 'GO:0048705', 'GO:0048706', 'GO:0048842', 'GO:0060971', 'GO:0061371', 'GO:0071907', 'GO:0097155', 'GO:0048513', 'GO:0048704', 'GO:0035108', 'GO:0045879', 'GO:0060976', 'GO:0097094', 'GO:0006508', 'GO:0050878', 'GO:0001558', 'GO:00…	44
Contig010722	[]	0
Contig015472	['GO:0006351', 'GO:0006355', 'GO:0048384', 'GO:0006357', 'GO:0071376', 'GO:0000122', 'GO:0007275', 'GO:0009725', 'GO:0030154', 'GO:0045944', 'GO:0009755', 'GO:0048856', 'GO:0001657', 'GO:0002068', 'GO:0003417', 'GO:0006915', 'GO:0008283', 'GO:0012501', 'GO:0021756', 'GO:0022008', 'GO:0032331', 'GO:0035116', 'GO:0035264', 'GO:0043065', 'GO:0043068', 'GO:0048048', 'GO:0048566', 'GO:0055012', 'GO:00…	17
Contig004839	['GO:0006508', 'GO:0030198', 'GO:0007520', 'GO:0019222', 'GO:0007229', 'GO:0022617', 'GO:0120163', 'GO:0042742', 'GO:0044691']	5
Contig011052	['GO:0043410', 'GO:0008090', 'GO:0016192', 'GO:0046328', 'GO:0048675', 'GO:0099642', 'GO:0016310', 'GO:0001701', 'GO:0007254', 'GO:0007411', 'GO:0007585', 'GO:0008104', 'GO:0009791', 'GO:0010468', 'GO:0030900', 'GO:0043507', 'GO:0048286', 'GO:0060425', 'GO:0061564', 'GO:0099641', 'GO:2001224']	9
Contig004144	['GO:0043491', 'GO:0048812', 'GO:0016310', 'GO:0035556', 'GO:0030182']	4
Contig007963	['GO:0006357', 'GO:0010886', 'GO:0045944', 'GO:0000122', 'GO:0006355', 'GO:0009267', 'GO:0032933', 'GO:0042632', 'GO:0071404', 'GO:0090370', 'GO:1902895', 'GO:0006629', 'GO:0008202', 'GO:0008203', 'GO:0008593', 'GO:0009725', 'GO:0045542', 'GO:0045893', 'GO:0071499', 'GO:1903146', 'GO:1903955']	10
Contig009011	['GO:0008283', 'GO:0043066', 'GO:0048598', 'GO:0048839', 'GO:0060117', 'GO:0001516', 'GO:0001934', 'GO:0008284', 'GO:0009966', 'GO:0010628', 'GO:0010629', 'GO:0010760', 'GO:0043518', 'GO:0051260', 'GO:0070374', 'GO:1902165', 'GO:1902254', 'GO:0007166', 'GO:0010739', 'GO:0030890', 'GO:0032502', 'GO:0032760', 'GO:0033138', 'GO:0048146', 'GO:0050731', 'GO:0070207', 'GO:1902166', 'GO:2000773', 'GO:00…	26
Contig010844	['GO:0044528', 'GO:0000963', 'GO:0016310', 'GO:0010468', 'GO:0010467']	3
Contig000385	['GO:0022414', 'GO:0007283', 'GO:0007342', 'GO:0009566', 'GO:0030154']	4
Contig004171	['GO:0006811', 'GO:0055085', 'GO:0070588', 'GO:0001525', 'GO:0001570', 'GO:0006828', 'GO:0046847', 'GO:0051480', 'GO:0042438', 'GO:0051281', 'GO:0051592', 'GO:0006816']	7
Contig005317	['GO:0006508', 'GO:0000209', 'GO:0006511', 'GO:0043161', 'GO:0070534', 'GO:0070936', 'GO:0016567', 'GO:0030163', 'GO:0032446']	4
Contig000627	['GO:0001963', 'GO:0007186', 'GO:0007189', 'GO:0007212', 'GO:0065008', 'GO:0001975', 'GO:0001992', 'GO:0001994', 'GO:0007191', 'GO:0007617', 'GO:0008306', 'GO:0019226', 'GO:0033861', 'GO:0042060', 'GO:0042220', 'GO:0045776', 'GO:0045924', 'GO:0046960', 'GO:0060292', 'GO:0071870', 'GO:0072593', 'GO:0071880', 'GO:0007610', 'GO:0006469', 'GO:0007188', 'GO:0008542', 'GO:0030336', 'GO:0099072', 'GO:00…	11
Contig004888	['GO:0006355', 'GO:0045893', 'GO:0051094', 'GO:0001503', 'GO:0001568', 'GO:0002062', 'GO:0002573', 'GO:0006357', 'GO:0007399', 'GO:0010628', 'GO:0010755', 'GO:0030097', 'GO:0030099', 'GO:0030182', 'GO:0030183', 'GO:0030223', 'GO:0032967', 'GO:0035162', 'GO:0045595', 'GO:0045637', 'GO:0045658', 'GO:0045660', 'GO:0060043', 'GO:0060216', 'GO:0061026', 'GO:0098508', 'GO:1903055', 'GO:1905203', 'GO:00…	15
Contig002091	['GO:0006412', 'GO:0002181', 'GO:0006364', 'GO:0042273', 'GO:0000470', 'GO:0045471', 'GO:0010467']	4
Contig010583	['GO:0006811', 'GO:0006812', 'GO:0007601', 'GO:0055085', 'GO:0098655', 'GO:0050896']	6
Contig008455	['GO:0000079', 'GO:0006355', 'GO:0006357', 'GO:0006396', 'GO:0043484', 'GO:0042981', 'GO:0046605', 'GO:0051726', 'GO:0010468', 'GO:0010467', 'GO:0043549', 'GO:0050790']	7
Contig000793	['GO:0007015', 'GO:0030050', 'GO:0099518', 'GO:0048731', 'GO:1904888', 'GO:0030036']	3
Contig014692	['GO:0031397', 'GO:0048741', 'GO:0036268', 'GO:0061061', 'GO:0031398', 'GO:0032434', 'GO:0035914', 'GO:0051146', 'GO:0019222', 'GO:0032436', 'GO:0098528', 'GO:0032435', 'GO:0016567', 'GO:0043161', 'GO:0007519', 'GO:0045732', 'GO:0007517', 'GO:0042177', 'GO:2000060']	6
Contig011634	['GO:0007155', 'GO:0006897', 'GO:0007267', 'GO:0016525', 'GO:0042742', 'GO:0048856', 'GO:1901492', 'GO:0050793', 'GO:0006898', 'GO:0006954', 'GO:0002376', 'GO:0045087', 'GO:0006508', 'GO:0050878']	10
Contig015271	['GO:0010467', 'GO:0006397', '', 'GO:0042462', 'GO:0090304']	3
Contig004459	['GO:0007018', 'GO:0048731', 'GO:0010976']	2
Contig012799	['GO:0006355', 'GO:0006357', 'GO:0071456', 'GO:0001666', 'GO:0007219', 'GO:0014823', 'GO:0030182', 'GO:0031017', 'GO:0043523', 'GO:0048565', 'GO:0051402', 'GO:0060218', 'GO:0097150', 'GO:1990402', 'GO:0019222', 'GO:0030154', 'GO:0048856', 'GO:0120162', 'GO:0001525', 'GO:0001892', 'GO:0001974', 'GO:0002027', 'GO:0002070', 'GO:0006366', 'GO:0006979', 'GO:0007005', 'GO:0007601', 'GO:0010467', 'GO:00…	20
Contig000661	['GO:0006887', 'GO:0016192', 'GO:0045921', 'GO:0035418', 'GO:0098930', 'GO:0071985', 'GO:0099641', 'GO:0017157', 'GO:0048488', 'GO:0008104']	3
Contig002614	['GO:0070886', 'GO:0050848']	0
Contig015939	['GO:0055085']	1
Contig009644	['GO:0018406', 'GO:0006486', 'GO:0018193', 'GO:0035268']	1
Contig007866	['GO:0001732', 'GO:0002183', 'GO:0002191', 'GO:0006412', 'GO:0006413', 'GO:0045727', 'GO:0075522', 'GO:0075525', 'GO:1902416', 'GO:0006446', 'GO:0010467', 'GO:0010468']	5
Contig014553	['GO:0009072', 'GO:0042427', 'GO:0007275', 'GO:0016192', 'GO:0051649', 'GO:0008152', 'GO:1902036', 'GO:0002576', 'GO:0006587', 'GO:0045595', 'GO:0048856', 'GO:1900046', 'GO:0006559', 'GO:0006520', '', 'GO:0045600', 'GO:0046849', 'GO:0060749', 'GO:0007623', 'GO:0030279', 'GO:0035902', 'GO:1901615']	9
Contig015760	['GO:0002043', 'GO:0006469', 'GO:0006933', 'GO:0007160', 'GO:0007229', 'GO:0008284', 'GO:0008285', 'GO:0010595', 'GO:0010764', 'GO:0032091', 'GO:0032148', 'GO:0033622', 'GO:0033628', 'GO:0035148', 'GO:0035924', 'GO:0043087', 'GO:0043113', 'GO:0044344', 'GO:0045747', 'GO:0045944', 'GO:0051451', 'GO:0051496', 'GO:0051894', 'GO:0051895', 'GO:0051897', 'GO:0070373', 'GO:0072659', 'GO:0090051', 'GO:00…	20
Contig010436	['GO:0002376']	1
Contig010304	['GO:0000245', 'GO:0000375', 'GO:0008380', 'GO:0006397', 'GO:0016558', 'GO:0010467', 'GO:0065003']	6
Contig014240	['GO:0035556', 'GO:0050790', 'GO:0090630', 'GO:0043507', 'GO:0051091', 'GO:0051496', 'GO:1904591', 'GO:0002408', 'GO:0030036', 'GO:0032956', 'GO:0043087', 'GO:0043547', 'GO:0051493', 'GO:0061484', 'GO:0071803']	4
Contig012315	['GO:0030593', 'GO:0030595', 'GO:0045806', 'GO:0048246', 'GO:0050918', 'GO:0051924', 'GO:0071621', 'GO:2001237', 'GO:0008380', 'GO:0002548', 'GO:0048245', 'GO:0090280', 'GO:0001944', 'GO:0002040', 'GO:0007157', 'GO:0008285', 'GO:0010628', 'GO:0010629', 'GO:0022408', 'GO:0042129']	7
Contig011602	['GO:0006357', 'GO:0000122', 'GO:0002273', 'GO:0002695', 'GO:0030225', 'GO:0030851', 'GO:0030853', 'GO:0045650', 'GO:0045656', 'GO:0097028', 'GO:2001199', 'GO:2001200']	2
Contig011923	['GO:0099505', 'GO:0048666', 'GO:0007605', 'GO:0060079', 'GO:0060078', 'GO:1901698', 'GO:0007399', 'GO:0071407', 'GO:0006811', 'GO:0007268', '', 'GO:0043524', 'GO:0060384', 'GO:0051932', 'GO:0007267', 'GO:0007214', 'GO:0090102', 'GO:0007416', 'GO:0071420', 'GO:0098656', 'GO:0060119', 'GO:0034220', '', 'GO:0043523', 'GO:0006821', 'GO:1902476', 'GO:0050877', 'GO:1904862', 'GO:0042391']	15
Contig006186	['GO:0006364', 'GO:0000028', 'GO:0010467', 'GO:0045727', 'GO:0031571', 'GO:0006412', 'GO:0065003', 'GO:0006978', 'GO:0042771', 'GO:0006919']	4
Contig009964	['GO:0007507', 'GO:0048568', 'GO:2000020', 'GO:0055010', 'GO:0060045', 'GO:0060412', 'GO:0007506', 'GO:0009653', 'GO:0007517', 'GO:0045944', 'GO:0048729', 'GO:2000195', 'GO:0045892', '', 'GO:0003221', 'GO:0003231', 'GO:0003281', 'GO:0030324', 'GO:0006357', 'GO:0001570', 'GO:0042127', 'GO:0045595', 'GO:0003206', 'GO:0010604', 'GO:0048639', 'GO:0045893', 'GO:0003195', 'GO:0048738', 'GO:0055008', 'G…	12
Contig000154	['GO:0016567', 'GO:0007517', 'GO:0022008', 'GO:0043393', 'GO:0030154']	4
Contig006393	['GO:0008104', 'GO:0031401', 'GO:0042592', 'GO:0046324', 'GO:0042593', 'GO:0006886', 'GO:0046907']	3
Contig010182	['GO:0016567', 'GO:0035821', 'GO:0010468', 'GO:0045087']	4
Contig012933	['GO:1903825', 'GO:0006814', 'GO:0006811', 'GO:0035725', 'GO:0098656', 'GO:1905039', 'GO:0015908', 'GO:0006915', 'GO:0015730', 'GO:0035873', 'GO:0015718', 'GO:0015913', 'GO:0055085']	8
Contig001646	['GO:0006363', 'GO:0008156', 'GO:0006338', 'GO:0006361', 'GO:0006353', 'GO:0006360']	3
Contig001196	['GO:0060326', 'GO:0006935', 'GO:0048247', 'GO:0006954', 'GO:0002548']	3
Contig008654	['GO:0043123', 'GO:0051216', 'GO:0030166', 'GO:0001501', 'GO:0006024', 'GO:0046963', 'GO:0001649', 'GO:1902559', 'GO:0001503', 'GO:0030198', 'GO:0042476', 'GO:0055085', 'GO:0031290']	7
Contig004137	['GO:1903232', 'GO:0060155', 'GO:0016192', 'GO:0006605', 'GO:0006886', 'GO:0015031']	4
Contig011171	[]	0
Contig000472	['GO:0007015', 'GO:0007507', 'GO:0006936', 'GO:0060047', 'GO:0030240', 'GO:0048741', 'GO:0043066', 'GO:0009410', 'GO:0070252', 'GO:0033275', 'GO:0009887', 'GO:0097746', 'GO:0010628', 'GO:0055008', 'GO:0030239', 'GO:0060048', 'GO:0031032', 'GO:0030154', 'GO:0030048', 'GO:0045471', 'GO:0051301', 'GO:0051701', 'GO:0009888', 'GO:0014866', 'GO:0003007', 'GO:0090131', 'GO:0055003', 'GO:0006939']	15
Contig003275	['GO:0034446', 'GO:0001921', 'GO:0017156', 'GO:0032502', 'GO:0065003', 'GO:0006904', 'GO:0016192', 'GO:0071346', 'GO:1903531', 'GO:0006906', 'GO:0051649', 'GO:0035493', 'GO:0061025', 'GO:0051641', 'GO:0043001', 'GO:0042147', 'GO:0006887', 'GO:0015031']	9
Contig012424	[]	0
Contig002578	['GO:0010936', 'GO:1900016']	1
Contig014662	['GO:0007204', 'GO:0006629', 'GO:0007507', 'GO:0007173', '', 'GO:0032981', 'GO:0016310', 'GO:0051599', 'GO:0006468', 'GO:0033209', 'GO:0006940', 'GO:0055085', 'GO:0006816', 'GO:0043588', 'GO:0008277', 'GO:0035556', 'GO:0007264', 'GO:0019722', 'GO:0050790', 'GO:0045859', 'GO:0031424', 'GO:0006811', 'GO:0016042', 'GO:0032835', 'GO:0097284', 'GO:0045214', 'GO:0007200', 'GO:0097191', 'GO:0010038', ''…	27
Contig012585	['GO:1903830', 'GO:0030001', 'GO:0098655', 'GO:0006812', 'GO:0006811']	5
Contig006255	['GO:0015711', 'GO:0098869', 'GO:0034599', '', 'GO:0009410', 'GO:0034635', 'GO:0033993', 'GO:0002244', 'GO:0006749', 'GO:0006979', 'GO:0032496', 'GO:0030097', 'GO:0033327', 'GO:0071449']	7
Contig011804	['GO:0071639', 'GO:0006979', 'GO:0051649', 'GO:0045728', 'GO:0032722', 'GO:0032760', 'GO:0042102', 'GO:2000406', 'GO:0032469', 'GO:0006816', 'GO:1990266', 'GO:0035556', 'GO:0006811', 'GO:0030335', 'GO:0010742', 'GO:0006915', 'GO:1902624', 'GO:0050848', 'GO:0032755', 'GO:0018345', 'GO:0072678', 'GO:0042098', 'GO:0051223', 'GO:0070059', 'GO:0002230']	8
Contig007078	['GO:0018230', 'GO:0043123', 'GO:0018345', 'GO:0051386', 'GO:0043408', 'GO:1903830', 'GO:0006612', 'GO:0007409', 'GO:0048812', 'GO:0008104', 'GO:0015693', 'GO:0042953', 'GO:0009966', 'GO:0070372', 'GO:0030182']	9
Contig012545	['GO:0015807', 'GO:1902475', 'GO:0055085']	2
Contig007680	['GO:1990573', 'GO:0099505', 'GO:0034220', 'GO:0006813', 'GO:0071805', 'GO:0006811', 'GO:0034765']	6
Contig014612	['GO:0009566', 'GO:0035821', 'GO:0006958', 'GO:0006508']	3
Contig002905	['GO:0071479', 'GO:0045739', 'GO:0006281', 'GO:0006307', 'GO:0060644', 'GO:0014070', 'GO:0043066', 'GO:2000781', 'GO:0009410', 'GO:0006974', '', '', 'GO:0009636', 'GO:0071407', 'GO:0034599', 'GO:0006304', 'GO:0032259', 'GO:0051593', 'GO:0043281', 'GO:0045471', 'GO:0006266']	10
Contig002149	['GO:0045892', 'GO:0045944']	2
Contig012869	['GO:0001714', 'GO:0070373', 'GO:0009888', 'GO:0043408', 'GO:0001706', 'GO:0043409', 'GO:0007369', 'GO:0040037', 'GO:0016311', 'GO:1903225', 'GO:0006470', 'GO:0035335']	4
Contig008785	['GO:0070373', 'GO:0006954', 'GO:0043408', 'GO:0071222', 'GO:0043409', 'GO:0050727', 'GO:0034142', 'GO:0009617', 'GO:0002755', 'GO:0043124', 'GO:0032496', 'GO:0002756', 'GO:0006357']	5
Contig004654	[]	0
Contig000918	[]	0
Contig000988	['GO:0065003', 'GO:0007005', 'GO:0033615']	1
Contig009502	['GO:0043123', 'GO:0009615', 'GO:0043330', '', 'GO:0006351', 'GO:0045944', 'GO:0051607', 'GO:0008152', 'GO:0008380', 'GO:0002735', 'GO:0045945', 'GO:0006260', 'GO:0045087', 'GO:0002376', 'GO:0006338', 'GO:0000375', 'GO:0062176', 'GO:0045893', 'GO:0006364', 'GO:0001649', 'GO:0010467', 'GO:0006366', 'GO:0045943']	14
Contig003668	['GO:0006357', 'GO:0072073', 'GO:0009888', 'GO:0007275', 'GO:0006351', 'GO:0007399', 'GO:0060429', 'GO:0006355', 'GO:0048731', 'GO:0001822', 'GO:0035295', 'GO:0030154', 'GO:0001657', 'GO:0072179']	6
Contig008660	['GO:0098655', 'GO:0034220', 'GO:0006811']	3
Contig006910	['GO:0007015', 'GO:0031175', 'GO:0030036', 'GO:0007399', 'GO:0035556', 'GO:0019722', 'GO:0030182']	7
Contig008854	['GO:0016042', 'GO:0044255', 'GO:0006629', 'GO:0006631', 'GO:0048771', 'GO:0048873', 'GO:0061519', 'GO:0006954', 'GO:0030324', 'GO:0001666', 'GO:0050673', 'GO:0016125', 'GO:0000902']	10
Contig014658	['GO:0048568', 'GO:0072520', 'GO:0009653', 'GO:0006281', 'GO:1905168', 'GO:0048856', 'GO:0008584', 'GO:0006974', 'GO:0019222', 'GO:0007275', 'GO:0043588', 'GO:0048872', 'GO:0000724', 'GO:0050679', 'GO:0007338', 'GO:0016579', 'GO:2000779', 'GO:0048705', 'GO:2000158', 'GO:0007283', 'GO:0035264', 'GO:1903003', 'GO:0006974', 'GO:1902525', 'GO:0006508']	9
Contig007675	['GO:0031214', 'GO:0042476', 'GO:0030282', 'GO:0035556']	3
Contig013520	['GO:0006082', 'GO:0009410', 'GO:0006790', 'GO:0043418', '', 'GO:0009636', 'GO:0006508']	3
Contig005608	['GO:0007098', 'GO:0007017', 'GO:0000278', 'GO:0000226']	4
Contig012828	['GO:0061024', 'GO:0031334', 'GO:0006654', 'GO:0090148', 'GO:0031647', 'GO:0032801', 'GO:1903778', 'GO:2000786', 'GO:0032465', 'GO:0051084', 'GO:0010508', 'GO:0006915', 'GO:0042149', 'GO:1903527', 'GO:0048102', 'GO:0016241', 'GO:0008654', '', 'GO:0034198', 'GO:1903955', '', 'GO:0006914']	8
Contig008213	[]	0
Contig003296	[]	0
Contig013676	['GO:0022414', 'GO:0007131', 'GO:0016925', 'GO:0008152', 'GO:0051026', 'GO:0007129', 'GO:0051321', 'GO:0006311']	6
Contig013078	['GO:0046890', 'GO:0006098', 'GO:0008152', 'GO:0005975', 'GO:0006739', 'GO:0009051', 'GO:2000064', 'GO:0006006', 'GO:0097305']	4
Contig012146	['GO:0043154', 'GO:0031334', 'GO:0030183', 'GO:0001932', 'GO:0031929', 'GO:0002327', 'GO:0032006', 'GO:1901532', 'GO:0043066', 'GO:0033138', 'GO:0001783', 'GO:0032007', 'GO:0035556', 'GO:0050790', 'GO:0009267', 'GO:0045595', 'GO:0043065', 'GO:0032008', 'GO:0042981', 'GO:0001934', 'GO:0001775', 'GO:0008285', 'GO:0000122', 'GO:0002904', 'GO:2000973']	14
Contig007108	['GO:0008104', 'GO:0009306', 'GO:0005975', 'GO:0048856', 'GO:0006486', 'GO:0033299', 'GO:0006622', 'GO:0036211', 'GO:0007040']	7
Contig009530	['GO:0007218', 'GO:0007186']	2
Contig004560	['GO:0006687', 'GO:0006629', 'GO:0042552', 'GO:0008152', 'GO:0006672', 'GO:0050790', 'GO:0006683', 'GO:0006665', 'GO:0016042']	7
Contig009771	['GO:0009615', 'GO:0007186', 'GO:0018105', 'GO:0007178', 'GO:0043154', 'GO:0045124', 'GO:0016310', 'GO:0070374', 'GO:0045453', 'GO:0014911', 'GO:0098962', 'GO:0032148', 'GO:0007160', 'GO:0010641', 'GO:0035332', 'GO:2000588', 'GO:0043114', 'GO:0060444', 'GO:0045892', 'GO:0032570', 'GO:0031954', 'GO:0043406', 'GO:0048041', 'GO:0098609', 'GO:0035556', 'GO:2000394', 'GO:0010634', 'GO:0045859', 'GO:00…	36
Contig014830	['GO:0016050', 'GO:0010971', 'GO:0051447', 'GO:0031397', 'GO:0070169', 'GO:0060903', 'GO:0051225', 'GO:0007088', 'GO:0032876', 'GO:0045786', 'GO:0007057', 'GO:0045669', 'GO:0006275', 'GO:0016567', 'GO:1905322', 'GO:0040020', 'GO:1904667', 'GO:0010948', 'GO:0030335', 'GO:0042127', 'GO:0007049', 'GO:2000773', 'GO:0007346', 'GO:0045841', 'GO:0046785', 'GO:0051726', 'GO:0106061', 'GO:0008284', 'GO:00…	11
Contig003666	['GO:0008104', 'GO:0098884', 'GO:0072583', 'GO:0048488', 'GO:0006898', 'GO:0016192', 'GO:1902036', 'GO:0051649', 'GO:0046907', 'GO:0006897', 'GO:0006886', 'GO:0015031']	7
Contig013235	['GO:0042325', 'GO:0007015', 'GO:0043086', 'GO:0030036', 'GO:2001222', 'GO:0031032', 'GO:0021987', 'GO:0140059', 'GO:0030036', 'GO:0050790', 'GO:0048870', 'GO:0043149']	6
Contig005196	['GO:0006936', 'GO:0050770', 'GO:0021891', 'GO:0060412', 'GO:0006935', 'GO:0016199', 'GO:0007420', 'GO:0050922', 'GO:0010975', 'GO:0061364', 'GO:0022008', 'GO:0031290', 'GO:0021602', 'GO:0007413', 'GO:0032870', 'GO:0033564', 'GO:0003184', 'GO:0007399', 'GO:0051964', 'GO:0098609', 'GO:0050975', 'GO:0001657', 'GO:0003272', 'GO:0050925', 'GO:0045595', 'GO:0035904', 'GO:0007156', 'GO:0007411', 'GO:00…	8
Contig011292	['GO:0034033', 'GO:0007297', 'GO:0015937', 'GO:0008152', 'GO:0044237', 'GO:0007476', 'GO:0009152', 'GO:0016310', 'GO:0009150', 'GO:0006164', 'GO:0009058', 'GO:0034030', '', 'GO:0070328', 'GO:0008152']	6
Contig012331	['GO:0046579', 'GO:0045595', 'GO:0051057', 'GO:0019835', 'GO:0045666', 'GO:0046578', 'GO:0043549', 'GO:0001934', 'GO:0032880', 'GO:0045860', 'GO:0045859']	2
Contig007938	['GO:0009168', 'GO:0006163', 'GO:0014850', 'GO:0009152', 'GO:0006177', 'GO:0044281', 'GO:0097294', 'GO:0006164', 'GO:0044208', 'GO:0009060', 'GO:0044209', 'GO:0001666', 'GO:0007584', 'GO:0009156', 'GO:0042594', 'GO:0006167', 'GO:0008152', 'GO:0006189']	9
Contig006191	[]	0
Contig003041	['GO:0018105', 'GO:0016310', 'GO:0043536', 'GO:0070374', 'GO:0006468', 'GO:0045785', 'GO:0031666', 'GO:0001525', 'GO:0045931', '', 'GO:0070555', 'GO:2000707', 'GO:0045766', 'GO:0007596', 'GO:0106071', 'GO:0002159', 'GO:0035556', 'GO:0007155', 'GO:0097190', 'GO:0010595', 'GO:0045780', 'GO:0048513', 'GO:0030335', 'GO:0010613', 'GO:0090330', 'GO:0006915', 'GO:0048468', 'GO:0043687', 'GO:0045651', 'G…	12
Contig005375	['GO:0006874', '', 'GO:0005975', 'GO:0032781', '', 'GO:0019853', 'GO:1901318', 'GO:1903611', 'GO:1903011', 'GO:0043066', 'GO:0006469', 'GO:0045723', 'GO:1903052', 'GO:0051344', 'GO:0001889', 'GO:0097421', 'GO:1903625', 'GO:0050790', 'GO:0050680', 'GO:1901896', 'GO:1901671', 'GO:2000279', 'GO:0045019', 'GO:0010867', '', 'GO:0050848', '', 'GO:0043547', 'GO:1902679', 'GO:0022414', 'GO:0010922', 'GO:…	10
Contig002192	['GO:0048609', 'GO:0051301', 'GO:0006325', 'GO:0019988', 'GO:0006979', 'GO:0010468', 'GO:0030163', 'GO:0090304', 'GO:0008033', 'GO:0006508']	6
Contig015394	['GO:0003149', 'GO:0003289', '', '', 'GO:0051216', 'GO:2001032', 'GO:0070201', 'GO:0007275', 'GO:0006355', '', 'GO:0036211', 'GO:0048513', '', 'GO:0032259', 'GO:0090304', '', 'GO:0001501', 'GO:0000122', 'GO:0048706', 'GO:0003290', 'GO:0006325', 'GO:0048298', 'GO:0010468', 'GO:0060348']	10
Contig008234	['GO:0006816', 'GO:0034220', 'GO:0070588', 'GO:0006811', 'GO:0034765']	5
Contig001952	['GO:0032715', 'GO:0006629', 'GO:1902523', 'GO:0070374', 'GO:0071663', 'GO:0032481', 'GO:0032728', 'GO:0034141', 'GO:0034157', 'GO:0050868', 'GO:0070433', 'GO:1903753', 'GO:0032720', 'GO:0030217', 'GO:0071225', 'GO:0050671', 'GO:0034145', 'GO:0042307', 'GO:0006470', 'GO:1901222', 'GO:0035335', 'GO:2000566', 'GO:0022408', 'GO:0002376', 'GO:0042127', 'GO:0043408', 'GO:0010628', 'GO:0002685', 'GO:19…	15
Contig010188	['GO:0006357', '', 'GO:0000122', 'GO:0007283', 'GO:0006355', 'GO:0045944', 'GO:0010468', 'GO:0010845', 'GO:0030154']	7
Contig015331	['GO:0006355', 'GO:0006357', 'GO:0045944', 'GO:0007049']	4
Contig014744	['GO:1901662', 'GO:0070374', 'GO:2000379', 'GO:0042981', 'GO:0043525', 'GO:0022900', 'GO:1904707', 'GO:0007613']	3
Contig000689	['GO:0030655', 'GO:0009307', 'GO:0045132', 'GO:0046677', 'GO:0005975', 'GO:0051649', 'GO:0009252', 'GO:0050896', 'GO:0070197', 'GO:0070192', 'GO:0008152', 'GO:0032259', '', 'GO:0007129', 'GO:0051321', 'GO:0022414', 'GO:0045141', 'GO:0017001', 'GO:0006508']	12
Contig006322	['GO:0048513', 'GO:0007224', 'GO:0007512', 'GO:0050878', 'GO:0007596', 'GO:0030509', 'GO:0060215', 'GO:0045880', 'GO:0045446', 'GO:0009966', 'GO:0009791', 'GO:0006954', 'GO:0006508']	6
Contig003219	['GO:0022604', 'GO:0030155', 'GO:0030335', 'GO:0016601', 'GO:0007010', 'GO:0016477', 'GO:0097746', 'GO:0007520', 'GO:0045932', 'GO:0071800', 'GO:1904754', 'GO:0046849', 'GO:0035556', 'GO:0007264', 'GO:0050790', 'GO:0010634', 'GO:1900026', 'GO:1904694']	10
Contig001440	['GO:0006284', 'GO:0008152', 'GO:0006974', 'GO:0006281', 'GO:0036297', 'GO:0090304']	6
Contig006481	['GO:0072583', 'GO:0006900', 'GO:0065003', 'GO:0006898', 'GO:0016192', 'GO:0015031', 'GO:0051649', 'GO:0006897', 'GO:0048268', 'GO:0016185', 'GO:0048259', 'GO:2000369']	7
Contig007406	['GO:0061844', 'GO:0009888', 'GO:0008544', 'GO:0050830', 'GO:0043588', 'GO:0002244', 'GO:0045107', 'GO:0030334', 'GO:0031069', 'GO:0032880', 'GO:0031424', 'GO:0045109', 'GO:0009612']	4
Contig015415	['GO:0061564', 'GO:0031175', 'GO:1904427', 'GO:0014002', 'GO:0022008', 'GO:0021762', 'GO:0042552', 'GO:0098990', 'GO:0042759', 'GO:0007268', 'GO:0030335', 'GO:0010628', 'GO:0022010', 'GO:0023052', 'GO:0007417', 'GO:0048469', 'GO:0010001', 'GO:0006954', 'GO:0030182', 'GO:0008366']	9
Contig004611	['GO:0006369', 'GO:0033389', 'GO:0051179', 'GO:0055085']	3
Contig007777	['GO:0034644', 'GO:0051301', 'GO:0007049', 'GO:0016567', 'GO:0006260', 'GO:0031571', 'GO:0016485']	4
Contig005890	['GO:0006954', '', 'GO:0006508']	2
Contig005827	['GO:0050982', 'GO:0006812', 'GO:0071260', 'GO:0034220', 'GO:0042391', 'GO:0098655', 'GO:0009612', 'GO:0006811', 'GO:0050974']	5
Contig000244	['GO:0009267', 'GO:0000045', 'GO:0016236', 'GO:0000422', 'GO:0035973', 'GO:0006995', 'GO:0032527', 'GO:0097352', 'GO:0006914', 'GO:0007005']	5
Contig012058	['GO:0097638', 'GO:0015711', 'GO:1903352', 'GO:0015807', 'GO:0006809', 'GO:0051649', 'GO:0150104', 'GO:0006865', 'GO:0055085', 'GO:1903826', 'GO:0050727', 'GO:1902475', 'GO:0089718', 'GO:0098656', 'GO:0043030', 'GO:0002537', 'GO:0042116', 'GO:1903401', 'GO:0006812']	8
Contig009520	['', 'GO:0071705', 'GO:0065008', 'GO:1901642', 'GO:0015858']	4
Contig004978	['GO:0008104', 'GO:0016192', 'GO:0006887', 'GO:0032940', 'GO:0006886', 'GO:0046907']	4
Contig010973	['GO:0051897', 'GO:0042127', 'GO:0045766', 'GO:0045944', 'GO:0006915', 'GO:0051897', 'GO:0001525', 'GO:0001934', 'GO:0043410', 'GO:0043066', 'GO:0001938']	9
Contig004657	['GO:0008104', 'GO:0006886', 'GO:0006334', 'GO:0030001', 'GO:0032527', 'GO:0055085', 'GO:0006914', 'GO:0046907']	6
Contig008107	['GO:0060078', 'GO:0034220', 'GO:0007214', 'GO:1902476', 'GO:0006821', 'GO:0050877', 'GO:0060079', 'GO:0042391', 'GO:0006811', 'GO:0007268']	8
Contig007134	['GO:0006635', 'GO:0006629', 'GO:0032501', 'GO:0006637', 'GO:0031505', 'GO:0016310', 'GO:0009152', 'GO:0000038', 'GO:0048193', 'GO:0005975', 'GO:0030157', 'GO:0000278', 'GO:0008610', 'GO:0099612', 'GO:0006913', 'GO:0042760', 'GO:0046907', 'GO:0044780', '', 'GO:0032720', 'GO:0016114', '', 'GO:0006890', 'GO:0061053', 'GO:0015909', 'GO:0015910', 'GO:0010883', 'GO:0006891', 'GO:0006355', 'GO:0007112'…	26
Contig004318	['GO:0006408', 'GO:0006397', 'GO:0051028', 'GO:0042789', 'GO:0006915', 'GO:0010467', 'GO:0006370', 'GO:0006406', 'GO:0006913', 'GO:0051607']	8
Contig015664	['GO:0006513', 'GO:0070936', 'GO:0000209', 'GO:0051865', 'GO:0043161', 'GO:0016567', 'GO:0070979', 'GO:0006511', 'GO:0032446']	3
Contig009062	['GO:0098880', '', 'GO:0046034', 'GO:0048568', 'GO:1904592', 'GO:0044743', 'GO:0000398', 'GO:0006986', 'GO:0048856', 'GO:0010667', 'GO:0034605', 'GO:1904764', 'GO:0044788', 'GO:1990832', 'GO:0043085', 'GO:0045892', 'GO:0032570', 'GO:0045862', 'GO:0009410', 'GO:0000082', 'GO:0008380', 'GO:0030900', 'GO:0007369', 'GO:0006606', 'GO:0009792', 'GO:0061684', 'GO:0007519', 'GO:0061635', 'GO:0061738', 'G…	23
Contig007815	['', 'GO:0016310', 'GO:0006468', 'GO:0009966', 'GO:0006913', 'GO:0022008', 'GO:0085020', 'GO:0046907', 'GO:0060765', 'GO:0071705', 'GO:0070936', 'GO:0000209', 'GO:0016567', 'GO:0010977', 'GO:0006355', 'GO:0044314', 'GO:0008033', 'GO:0006396', 'GO:0030517', 'GO:0045595', 'GO:0032259', 'GO:0043170', 'GO:0001510', 'GO:0001558', 'GO:0045893', 'GO:0030488', 'GO:0006396', 'GO:0048675', 'GO:0033036', 'G…	16
Contig011174	['GO:0000724', 'GO:0000281', 'GO:0032465', 'GO:0051301', 'GO:0006974', 'GO:0007049', 'GO:0007409', 'GO:0006281', 'GO:0000278', 'GO:0061640', 'GO:1905037', 'GO:0048599', 'GO:0007040', 'GO:0051726']	11
Contig015144	['GO:0015711', 'GO:0060326', 'GO:0006935', 'GO:0016477', 'GO:0140115', 'GO:0050729', 'GO:0006979', 'GO:0150104', 'GO:0006869', 'GO:0055085', 'GO:0009410', '', 'GO:0070633', 'GO:1901698', 'GO:0015889', 'GO:0009235', 'GO:0071716', 'GO:1904646', 'GO:0009636', '', 'GO:0010038', 'GO:0034775', 'GO:0030335', 'GO:0099039', 'GO:0071585', 'GO:0050727', 'GO:0015698', 'GO:0042908', 'GO:1990962', 'GO:1905039'…	12
Contig008420	['GO:0006261', 'GO:0000724', 'GO:0005977', 'GO:0005978', 'GO:0005979', 'GO:0000727', 'GO:1900264', 'GO:0001833', 'GO:0006281', 'GO:0005975', 'GO:0006268', 'GO:0006260', 'GO:0032392', 'GO:1903934']	8
Contig001235	['GO:0006486', 'GO:0006493', 'GO:0018242']	2
Contig010089	['GO:0009967', 'GO:1990542', 'GO:0042273', 'GO:0009966', 'GO:0034605', 'GO:0016444', 'GO:0008283', 'GO:0043066', 'GO:0031137', 'GO:0019222', 'GO:0007275', 'GO:0022409', 'GO:0031142', 'GO:0080090', 'GO:0042026', 'GO:0019222', 'GO:0000289', 'GO:0006458', 'GO:0030042', 'GO:0006919', 'GO:0061077', 'GO:0045041', 'GO:0060255', 'GO:0043065', 'GO:0010628', 'GO:0000463', 'GO:0002221', 'GO:0006915', 'GO:00…	31
Contig013063	['GO:0016558', 'GO:0045892', 'GO:0007031', 'GO:0016560', 'GO:0034453', 'GO:0032091', 'GO:0044721', 'GO:0043433', 'GO:0016561', 'GO:0065003', 'GO:0036250', 'GO:0015031']	6
Contig005778	['', 'GO:0009825', 'GO:0006874', 'GO:0016236', 'GO:0007420', 'GO:0048666', 'GO:0007032', 'GO:0097156', 'GO:0006907', 'GO:0032060', 'GO:0000045', 'GO:0006909', 'GO:0050807', 'GO:0033962', 'GO:0046622', 'GO:1903335', 'GO:0007155', 'GO:0008104', 'GO:0033298', 'GO:0000915', 'GO:0006282', 'GO:0080001', 'GO:0022416', 'GO:1904580', 'GO:1902892', 'GO:0035973', 'GO:0048749', 'GO:0007033', 'GO:0000281', 'G…	14
Contig009492	['GO:0036269', 'GO:0060041', 'GO:0009416', 'GO:0043153', 'GO:0009649', 'GO:0045944', 'GO:1902336', 'GO:0043010', 'GO:0050769', 'GO:0048663', 'GO:0021554', 'GO:0007399', 'GO:0006355', 'GO:0010842', 'GO:0007346', 'GO:0007623', 'GO:0001654', 'GO:0010996', 'GO:0045165', 'GO:0030154', 'GO:0051726', 'GO:0043473', 'GO:0021545', 'GO:0003407', 'GO:0006357', 'GO:0030182']	13
Contig011274	['GO:0009214', 'GO:0007417', 'GO:0046902', 'GO:0007409', 'GO:0008344', 'GO:0030900', 'GO:0048709', 'GO:0009117', 'GO:0032496', 'GO:1901292', 'GO:0007399', 'GO:0000226', '', 'GO:0009636', 'GO:0021762', 'GO:0007268']	10
Contig007971	['GO:0042445', 'GO:0016098', 'GO:0009804', 'GO:0051100', 'GO:0008152', 'GO:0009822', 'GO:0008152', 'GO:1901615', 'GO:0042572', 'GO:0006082', 'GO:0008210', 'GO:0009820', 'GO:0070989', 'GO:0019369', 'GO:0006805', 'GO:0042178', 'GO:0008152', 'GO:0090350', 'GO:0008202', 'GO:0033076']	4
Contig013621	['GO:0055092', 'GO:0042632', 'GO:0001558', 'GO:0006626']	2
Contig011055	['GO:0007188', 'GO:0007186', 'GO:0070886', 'GO:0007218']	2
Contig007950	['GO:0010608', 'GO:0035196', 'GO:0010467', 'GO:0010629']	2
Contig013393	['GO:0042491', 'GO:0070374', 'GO:0045664', 'GO:0051781', 'GO:0014059', 'GO:0044344', 'GO:1904340', 'GO:0008543', 'GO:0043524', 'GO:0009887', 'GO:0045595', 'GO:0010628', 'GO:0007267', 'GO:0030334', 'GO:0060043', 'GO:0001934', 'GO:0030154', 'GO:0008284', 'GO:0060113']	8
Contig005673	['GO:0046718', 'GO:0008104', 'GO:0015917', 'GO:1905123', 'GO:1905671', 'GO:0006898', 'GO:0010467', 'GO:0043470', 'GO:0006897', 'GO:1904978', 'GO:0007605', 'GO:0006622', 'GO:0010976']	5
Contig007022	['GO:0009410', 'GO:1990830', 'GO:0060395', 'GO:0045184', 'GO:0006869', '']	2
Contig007494	['GO:0051592', 'GO:0007608', 'GO:0061179']	1
Contig013896	['GO:0009451', 'GO:0002949', 'GO:0042780', 'GO:0006450', 'GO:0006396', 'GO:0010467', 'GO:0090304', 'GO:0006351', 'GO:0051051', 'GO:0008033', 'GO:0042780']	8
Contig015172	['GO:1904898', 'GO:0046426', 'GO:0042532', 'GO:0043377', 'GO:0042509', 'GO:0045088', 'GO:0001932', 'GO:0007259', 'GO:0002684', 'GO:0043549', 'GO:0009966', 'GO:0019221', 'GO:0060336', 'GO:0071230', 'GO:2000406', 'GO:0019222', 'GO:0006661', 'GO:0030225', 'GO:0016567', 'GO:0035556', 'GO:0035162', 'GO:0071407', 'GO:0046627', 'GO:0043086', 'GO:0051896', 'GO:0009968', 'GO:0045591', 'GO:0032868', 'GO:00…	15
Contig014123	['GO:0030321', 'GO:0007186', 'GO:0035589', 'GO:0099509', 'GO:0051480', 'GO:0007200', 'GO:0007204', 'GO:0097746', 'GO:0070257', 'GO:1901701', 'GO:0006821', 'GO:0071318', 'GO:2000300', 'GO:0071380', '']	8
Contig007897	['GO:0007611', 'GO:0007186', 'GO:0007204', 'GO:0006936', 'GO:0031175', 'GO:1902608', 'GO:0045944', 'GO:0034765', 'GO:0007631', 'GO:0007188', 'GO:0007194', 'GO:0007189', 'GO:0046488', 'GO:0007268', 'GO:0090663', 'GO:0007200', 'GO:0007166', 'GO:0043647', 'GO:0051480', 'GO:0070886', 'GO:0007187', 'GO:0007218']	12
Contig010212	['GO:0051640', 'GO:0016310', 'GO:0005975', 'GO:0042273', 'GO:0006468', '', 'GO:0006913', 'GO:0046626', 'GO:0046907', 'GO:0006412', 'GO:0008152', 'GO:0051168', 'GO:0000463', 'GO:0042254', 'GO:0000054', 'GO:0000480', 'GO:0000472', 'GO:0000027', 'GO:0015031']	11
Contig006392	['GO:0090090', 'GO:0042159', 'GO:0030178', 'GO:0016043', 'GO:0006507', 'GO:1990697', 'GO:0030500', 'GO:0016055', 'GO:0021532', 'GO:0009952', 'GO:0060348']	5
Contig001695	['GO:0009451', 'GO:0002949', 'GO:0000723', 'GO:0008152', 'GO:0016310', 'GO:0006396', 'GO:0010467', 'GO:0000722', 'GO:0008033']	6
Contig013893	['GO:0006397', 'GO:0000375', 'GO:0008380', 'GO:1903241', 'GO:0000398', 'GO:0010467', 'GO:0000389', 'GO:0065003']	5
Contig005550	['GO:1903697', 'GO:0051056', 'GO:0043087', 'GO:0090630', 'GO:0050790', 'GO:0043547']	2
Contig003475	['GO:0010468', 'GO:0006446', 'GO:0006417']	2
Contig009937	['GO:0050806', 'GO:0051965', 'GO:0007155', 'GO:0007156', 'GO:0050803', 'GO:0051960']	2
Contig009195	['GO:0002943', 'GO:0043086', '', 'GO:0010467', 'GO:0008033']	3
Contig013143	['GO:0002181', 'GO:0010458', 'GO:0060041', 'GO:0042273', 'GO:0010467', 'GO:0140242', 'GO:0021554', 'GO:0000027', 'GO:0006412', 'GO:0140236', 'GO:0031290']	4
Contig014929	['GO:0050830', 'GO:0010628', 'GO:0042176', 'GO:0009968', 'GO:0008033', 'GO:0060261', 'GO:0006400', 'GO:0032968', 'GO:0051123', 'GO:0006355', 'GO:0035556', 'GO:0006351', 'GO:0006357', 'GO:0006367']	13
Contig002616	['GO:0048513', 'GO:0007178', 'GO:0048264', '', 'GO:0060063', 'GO:0001541', 'GO:0060016', 'GO:0009953', 'GO:0009966', 'GO:0060395', 'GO:0001934']	4
Contig008267	['GO:0070286', 'GO:0042073', 'GO:0002244', 'GO:0003341', 'GO:0001578', 'GO:0065003', 'GO:0007018', 'GO:0060271']	6
Contig006655	['GO:0051497', 'GO:0110020', 'GO:0051493', 'GO:1903076', 'GO:0099072', 'GO:0050808', 'GO:0007269', 'GO:0051649', 'GO:0032880', 'GO:0007160', 'GO:0032956', 'GO:1903077', 'GO:0007268']	5
Contig003310	[]	0
Contig003433	['GO:1901857', 'GO:0043161', 'GO:0034349', 'GO:0006979', 'GO:0006122', 'GO:0045333', 'GO:0042743', 'GO:0008635', 'GO:0051603', 'GO:0002931', 'GO:0034465', 'GO:0097193', 'GO:0010730', 'GO:0006123', 'GO:0006915', 'GO:0043280', 'GO:0022900', 'GO:0043393', 'GO:0046688', 'GO:0009629', 'GO:0010467', 'GO:0097202', 'GO:0006508']	10
Contig002360	['GO:0016050', 'GO:0016236', 'GO:0016310', 'GO:0034058', 'GO:1902774', 'GO:0006004', 'GO:0042144', 'GO:0048284', 'GO:0046907', 'GO:0036066', 'GO:0061025', 'GO:0006886', 'GO:0061909', 'GO:0009267', 'GO:0008333', 'GO:0008104', 'GO:0016192', 'GO:0009987', 'GO:0001654', 'GO:0035542', 'GO:0032012', 'GO:0032456', 'GO:0006996', 'GO:0048066', 'GO:0046578', 'GO:0007041', 'GO:0007033', 'GO:0097352', 'GO:00…	15
Contig006746	['GO:0009058']	1
Contig011407	['GO:0015711', 'GO:0015807', 'GO:0001819', 'GO:0070327', 'GO:0150104', 'GO:0098655', 'GO:0071230', 'GO:0060252', 'GO:0006865', 'GO:0032753', 'GO:0032740', 'GO:0055085', 'GO:1903801', 'GO:0015818', 'GO:0015823', 'GO:0015824', 'GO:0097421', 'GO:0032328', 'GO:1905460', 'GO:0055093', 'GO:1903801', 'GO:0015828', 'GO:0071222', 'GO:0010628', 'GO:0015827', 'GO:0015820', 'GO:1902475', 'GO:1904556', 'GO:00…	9
Contig011316	['GO:0009313', 'GO:0044248', 'GO:0007219', 'GO:0044255', 'GO:0008152', 'GO:0015878', '', 'GO:0005975', '', 'GO:0016567', 'GO:1990748', 'GO:0006013', 'GO:0019377', 'GO:0006811']	7
Contig014296	['GO:0046628', 'GO:0071333']	1
Contig013717	['GO:0007178', 'GO:0002029', 'GO:0007186', 'GO:0097746', 'GO:0007596', 'GO:0006835', 'GO:0050819', 'GO:0045893', 'GO:0095500', 'GO:0008015', 'GO:0007599', 'GO:0006357', 'GO:0006412', 'GO:0002250', 'GO:0055085']	11
Contig013610	['GO:0032543', 'GO:0006412', 'GO:0010467']	2
Contig001255	['GO:0015833', 'GO:1902600', 'GO:0006857', 'GO:0140206', 'GO:0015804', 'GO:0015031', 'GO:0140207', 'GO:0035672', 'GO:0035442', 'GO:0051956', 'GO:0055085']	5
Contig002210	['GO:0006543', 'GO:0002087', 'GO:0006541', 'GO:0001967', 'GO:0090461', 'GO:0051289', 'GO:0006537', 'GO:0007268']	2
Contig004239	['GO:0009408', 'GO:0019074', 'GO:0035278', 'GO:0048515', 'GO:0045665', 'GO:0006139', 'GO:0034063', 'GO:0007283', 'GO:0033962', 'GO:0017148', 'GO:0030182', 'GO:0010629', 'GO:0019827', 'GO:0009056']	7
Contig015219	['GO:0007010']	1
Contig011838	['GO:0072383', 'GO:0050770', 'GO:0006605', 'GO:0042110', 'GO:0007018']	2
Contig000463	['GO:0007018']	1
Contig015409	['GO:0045892', 'GO:0008285', '', 'GO:0000122', 'GO:0048488', 'GO:0050872', 'GO:0031507', 'GO:0045893', 'GO:0006468', 'GO:0030154', 'GO:0097091', 'GO:0019079', 'GO:0006357', '', 'GO:0051726', '']	6
Contig009479	['GO:0007084', 'GO:0051301', 'GO:0007049', 'GO:0007029', 'GO:0006998', 'GO:0045893', 'GO:0006355', 'GO:0071786', 'GO:0006811', 'GO:0055085']	7
Contig006344	['GO:0007507', 'GO:0044458', 'GO:0030030', 'GO:0035082', 'GO:1990403', 'GO:0007224', 'GO:0043010', 'GO:0007399', 'GO:0030031', 'GO:0060271', 'GO:0008104', 'GO:1904491', 'GO:1905515', 'GO:0061512', 'GO:0007166', 'GO:0035845', 'GO:0001843', 'GO:0007368', 'GO:0001822']	7
Contig000116	['GO:0006629', 'GO:0042445', 'GO:0007420', 'GO:2000844', 'GO:0006949', 'GO:0014070', 'GO:0050803', 'GO:0008406', 'GO:0061370', 'GO:0046660', 'GO:0008209', 'GO:0035176', 'GO:0010760', 'GO:0030540', 'GO:0006703', 'GO:0006694', 'GO:0032355', 'GO:0045779', 'GO:0008207', 'GO:0097720', 'GO:0007613', 'GO:0030879', 'GO:0071392', 'GO:0022900', 'GO:0008284', 'GO:0009888', 'GO:0002677', 'GO:2000866', 'GO:00…	13
Contig002592	[]	0
Contig016016	[]	0
Contig004395	['GO:2001238', 'GO:0006955']	1
Contig009236	['GO:1904635', 'GO:0097067', 'GO:0001678', 'GO:0051091', 'GO:1901857', 'GO:0072020', 'GO:0032922', 'GO:0120162', 'GO:0006094', 'GO:0005975', '', 'GO:0006979', 'GO:0006351', 'GO:0072068', 'GO:0045944', 'GO:1901860', 'GO:0043066', 'GO:0065003', 'GO:0045333', 'GO:0097009', 'GO:0007586', 'GO:0002021', 'GO:0048662', 'GO:0008380', 'GO:0014912', 'GO:0042752', 'GO:0019395', 'GO:0090258', 'GO:0006355', 'G…	21
Contig011319	['GO:0016236', 'GO:0045668', 'GO:0030500', 'GO:0032872']	1
Contig006418	['GO:0032570', 'GO:0035039', 'GO:0045815', 'GO:0010628', 'GO:0045944', 'GO:0007343', 'GO:0033148', 'GO:0045893', '', 'GO:0007338', 'GO:0035038', 'GO:0071391', 'GO:0043627', 'GO:0071169', 'GO:0050847', 'GO:0070925']	5
Contig014605	['GO:0048513', 'GO:0007507', 'GO:0007015', 'GO:0007010', 'GO:0001947', 'GO:0030036', 'GO:0045944', 'GO:0016043', 'GO:0030042', 'GO:0019417']	7
Contig003138	['GO:0043086', 'GO:0031175', 'GO:1904428', 'GO:0016310', 'GO:0030182', 'GO:0000902']	4
Contig009189	['GO:0061564', 'GO:0001541', 'GO:0050896', 'GO:0031290', 'GO:0007567', 'GO:0001955', 'GO:1901698', 'GO:0048771', 'GO:0009314', 'GO:0060325', 'GO:0043065', 'GO:0071347', 'GO:0035094', 'GO:0048705', 'GO:0042542', 'GO:0009888', 'GO:1904707', 'GO:0034644', 'GO:0032963', 'GO:0009653', 'GO:0001957', 'GO:0009725', 'GO:0071230', 'GO:0045906', 'GO:0001944', 'GO:0007566', 'GO:0030155', 'GO:0034097', 'GO:00…	22
Contig013892	['GO:0048513', 'GO:0030036', 'GO:0006355', 'GO:0007517', 'GO:0006351', 'GO:0010468']	6
Contig009268	['GO:0006974', 'GO:0000077', 'GO:0006325', 'GO:0016239', '', 'GO:0045893', '', 'GO:0031571', 'GO:0010506', 'GO:1904263', 'GO:0032435']	6
Contig008828	['GO:0048812', 'GO:0031223', 'GO:0050803', 'GO:0007605', 'GO:0050896', 'GO:0043414', 'GO:0043010', 'GO:0051965', 'GO:0001964', 'GO:0002088', 'GO:0007399', 'GO:0051960', 'GO:0060384', 'GO:0032259', 'GO:0060005', 'GO:0060007', 'GO:0090102', 'GO:1905606', 'GO:0002093', 'GO:0007416', 'GO:0007601', 'GO:0044238', 'GO:0042472', 'GO:0007409', 'GO:0008344', 'GO:0035264', 'GO:0008152', 'GO:0021562', 'GO:00…	11
Contig004389	['GO:0071423', 'GO:1902356', 'GO:0098656', 'GO:1902358', 'GO:0009060', 'GO:0015709', 'GO:0006839', 'GO:0035435', 'GO:0015698', 'GO:0071422', 'GO:0015729', 'GO:0055085', 'GO:1902358']	5
Contig007050	['GO:0032689', 'GO:0042130', 'GO:0042110', 'GO:0045669', 'GO:0010468', 'GO:0042098', 'GO:0050728', 'GO:0032743', 'GO:0001817', 'GO:0030501', 'GO:0050776', 'GO:0050852', 'GO:0032703', 'GO:0032729', 'GO:0042102']	4
Contig015685	['GO:0006082', 'GO:0006635', 'GO:0006629', 'GO:0090276', 'GO:0009410', 'GO:0014823', 'GO:0120162', 'GO:0046676', 'GO:0019369', 'GO:0050796', 'GO:0032868', 'GO:0006805', 'GO:0032880', 'GO:0009725', 'GO:0097267', 'GO:0006631']	6
Contig009004	['', 'GO:0006950', 'GO:0018279', 'GO:1904153', 'GO:0030968', 'GO:0010498', 'GO:0036503', 'GO:0006508']	6
Contig004011	['GO:0061564', 'GO:0051493', 'GO:0031175', 'GO:0031113', 'GO:0033043', 'GO:1903358', 'GO:0000226', 'GO:0007026', 'GO:0050773', 'GO:0031114', 'GO:0030182', 'GO:0031122']	6
Contig007357	['GO:0031175', 'GO:0045665', 'GO:0007158', 'GO:0007409', 'GO:0007420', 'GO:0007156', 'GO:0007413', 'GO:0048167', 'GO:0048666', 'GO:0098609', 'GO:0007411', 'GO:0070593', 'GO:0007399', 'GO:0007155', 'GO:0030182']	9
Contig013309	['GO:0051603', 'GO:0043161', 'GO:0006511', 'GO:0030163', 'GO:0010498', 'GO:0006508']	5
Contig000912	['GO:0006506', 'GO:0050976', 'GO:0008104', 'GO:0006661', 'GO:0016255', 'GO:0006497', 'GO:0034394', 'GO:0006508']	3
Contig012527	['GO:0007507', 'GO:0045597', 'GO:0016477', 'GO:0048812', 'GO:0007420', 'GO:0042742', 'GO:2000347', 'GO:0010976', 'GO:0022008', 'GO:0051781', 'GO:0042246', 'GO:0050896', 'GO:0010811', 'GO:0008360', 'GO:0007185', 'GO:0021915', 'GO:0061054', 'GO:0010594', 'GO:0051216', 'GO:0031104', 'GO:0007229', 'GO:0031641', 'GO:0048714', 'GO:0045778', 'GO:1900006', 'GO:0043588', 'GO:0048477', 'GO:0001756', 'GO:00…	22
Contig006996	['GO:0009267', 'GO:0045595', 'GO:0000209', 'GO:0043161', 'GO:2000060', 'GO:0032436', 'GO:0016567', 'GO:0048742', 'GO:0006913', 'GO:0010830', 'GO:0006511', 'GO:0006355', 'GO:0045732', 'GO:0036211', 'GO:0032434', 'GO:0006508']	9
Contig008112	['GO:0019222', 'GO:0016310', 'GO:0006468', 'GO:0033674', 'GO:0007169', 'GO:0042327', 'GO:0043549', 'GO:0030182', 'GO:0007411', 'GO:0007399', 'GO:0048013', 'GO:0050896', 'GO:0018108']	8
Contig014365	['GO:0016310']	1
Contig012885	['GO:0034644', 'GO:0031642', 'GO:2000639', 'GO:1901800', 'GO:0043161', 'GO:0070374', 'GO:0006281', 'GO:1903146', 'GO:0032006', 'GO:0045746', 'GO:0045741', 'GO:0055088', 'GO:0001525', 'GO:0007219', 'GO:0006974', 'GO:0006890', 'GO:0000209', 'GO:0031641', 'GO:0001944', 'GO:0042752', 'GO:0016567', 'GO:0010868', 'GO:0010883', 'GO:0006891', 'GO:1903026', 'GO:0030324', 'GO:0006886', 'GO:0006888', 'GO:00…	18
Contig000306	['GO:0016310', 'GO:0001819', 'GO:0006468', 'GO:0001865', 'GO:0045944', 'GO:0042246', 'GO:0007229', 'GO:0010543', 'GO:0060335', 'GO:0018108', 'GO:0002376', 'GO:0050852', 'GO:0002250', '', 'GO:0046777', 'GO:0010468', 'GO:0032729']	9
Contig002714	[]	0
Contig007197	['GO:0002376', 'GO:0006511', 'GO:0070536', 'GO:0016579', 'GO:0045087', 'GO:0016055', 'GO:0006508']	5
Contig014572	['GO:0007189']	1
Contig010504	['GO:0051301', 'GO:0007049', 'GO:0051865', 'GO:0016567', 'GO:0046529', 'GO:1901992']	3
Contig012403	['GO:0007131', 'GO:0006281', 'GO:0045132', 'GO:0007144', 'GO:0007141', 'GO:0008152', 'GO:0009566', 'GO:0007143', 'GO:0007276', 'GO:0030091', 'GO:0090304', 'GO:0007292', 'GO:0070192', 'GO:0000724', 'GO:0000712', 'GO:0007129', 'GO:0006302', 'GO:0051321', 'GO:0030716', 'GO:0022414', 'GO:0000280', 'GO:0007140']	14
Contig009239	[]	0
Contig013300	['GO:0002154', 'GO:0035855', 'GO:0030218', 'GO:0048822', 'GO:0045892', 'GO:0031100', 'GO:0033598', 'GO:0043588', 'GO:0033148', 'GO:0071363', 'GO:0035050', 'GO:0045893', 'GO:0003406', 'GO:0009888', 'GO:0042789', 'GO:0045618', 'GO:0006366', 'GO:0000902', 'GO:0003222', 'GO:0097067', 'GO:0030216', 'GO:0007420', 'GO:0071364', 'GO:0060218', 'GO:0045944', 'GO:0009725', 'GO:0043010', 'GO:0035729', 'GO:00…	23
Contig005746	['GO:0071260', 'GO:0070741', 'GO:0002682', 'GO:0001867', 'GO:0051384', 'GO:0006869', 'GO:0009725', 'GO:0001666', 'GO:0070849', 'GO:0050766', 'GO:0055093', 'GO:0045087', 'GO:0002376', 'GO:0008228', 'GO:0007623', 'GO:0001503', 'GO:0035821', 'GO:0032526', 'GO:0033189', 'GO:0071732', 'GO:0007585', 'GO:0032496']	8
Contig014952	['GO:0016567', 'GO:0006814', 'GO:0042632', 'GO:0006811']	4
Contig010953	['GO:0010628', 'GO:0010468', 'GO:0060261', 'GO:0032968', 'GO:0051123', 'GO:0006355', 'GO:0006351', 'GO:0006357', 'GO:0006367']	8
Contig007930	['GO:0070131', 'GO:0006414', 'GO:0000266', 'GO:0071456', 'GO:0090314', 'GO:0007005', 'GO:0090141']	5
Contig006571	['GO:0060998', 'GO:0061001', 'GO:0001701', 'GO:0099519']	0
Contig003481	['GO:0006357', 'GO:0001757', 'GO:0090051', 'GO:0009888', 'GO:0061053', 'GO:0060173', 'GO:0007519', 'GO:0060021', 'GO:0045944', 'GO:0006355', 'GO:0001525']	5
Contig011951	['GO:0022011', 'GO:1901184', 'GO:0033157', 'GO:0009966', 'GO:0032287', 'GO:0032880']	1
Contig011903	['GO:0006935', 'GO:0016477', 'GO:0001768', 'GO:0042110', 'GO:0002277', 'GO:0035022', 'GO:0046631', 'GO:0035556', 'GO:0007264', 'GO:0050766', 'GO:0050790', 'GO:0006897', 'GO:0030036', 'GO:0001766', 'GO:0001775', 'GO:0007010', 'GO:0002275', 'GO:0007520', 'GO:0042098', 'GO:0001771', 'GO:0045060', 'GO:0045059', 'GO:0046633', 'GO:0044351']	9
Contig009691	['GO:0022414', 'GO:0044458', 'GO:0090660', 'GO:0030030', 'GO:0120197', 'GO:0007283', 'GO:0120316', 'GO:0051649', 'GO:0003341', 'GO:0048870', 'GO:0030154', 'GO:0060294', 'GO:0060271']	9
Contig008582	['GO:0007283', 'GO:0030154', 'GO:0007286']	3
Contig008980	['GO:0007015', 'GO:0045761', 'GO:0007010', 'GO:0016477', 'GO:0030036', 'GO:0019933', 'GO:0006898', 'GO:0001667', 'GO:0007190', 'GO:0051128', 'GO:0035556', 'GO:0006897', 'GO:0007163', 'GO:0000902']	8
Contig015682	['GO:0006082', 'GO:0034033', 'GO:0001501', 'GO:0008152', 'GO:0006790', 'GO:0009152', 'GO:0016310', 'GO:0008152', 'GO:0000103', 'GO:0034030', 'GO:0050428', 'GO:0008152']	5
Contig014287	['GO:0051225', 'GO:0090175', 'GO:0016055', 'GO:0045893', 'GO:0007283', 'GO:2000278', 'GO:0035821', 'GO:0030154', 'GO:0006887', 'GO:0033044']	7
Contig007114	['GO:0022414', 'GO:0000712', 'GO:0072429', 'GO:0006310', 'GO:0006974', 'GO:0000077', 'GO:0008152', 'GO:0031297', 'GO:0006281', 'GO:0000278', 'GO:0045132', 'GO:0006260', 'GO:0006302', 'GO:0031573', 'GO:0090304', 'GO:0051726']	13
Contig006645	['GO:0006629', 'GO:0001568', 'GO:0042445', 'GO:0016132', 'GO:0045540', 'GO:1901615', 'GO:0006066', 'GO:0016126', 'GO:0006694', 'GO:0030324', 'GO:0042446', 'GO:0042127', 'GO:0060487', 'GO:0006695', 'GO:0030154', 'GO:0035264', 'GO:0008203', 'GO:0008202', 'GO:0009791']	11
Contig001411	['GO:1900245', 'GO:0009615', 'GO:1900246', 'GO:0051607']	1
Contig013640	['GO:0006313', 'GO:0051301', 'GO:0007049', 'GO:0006355', 'GO:0015074']	4
Contig015625	['GO:1901731', 'GO:0061045', 'GO:0050878', 'GO:0007596', 'GO:0048583', 'GO:0042060', 'GO:0007155', 'GO:0033627', 'GO:0006508']	4
Contig003541	['GO:0008285', 'GO:0042127']	2
Contig002173	['GO:0006357', 'GO:0008584']	1
Contig004543	['GO:0099072', 'GO:0099645', 'GO:0097107', 'GO:0048856', 'GO:0007269', 'GO:0099171', 'GO:0007416', 'GO:0099537', 'GO:0007268']	4
Contig000230	['GO:0022409', 'GO:0030010', 'GO:0072092', 'GO:0048731', 'GO:0007018']	3
Contig011852	['GO:0007186', 'GO:0006874', 'GO:0048149', 'GO:0048814', 'GO:0001661', 'GO:0048168', 'GO:0007612', 'GO:0019722', 'GO:0050975', 'GO:0007613', 'GO:0007268', 'GO:0043524', 'GO:1902952', 'GO:0043065', 'GO:1905429', 'GO:0097553', 'GO:0010646', 'GO:0006366', 'GO:0006812', 'GO:0050770', 'GO:0042221', 'GO:2000463', 'GO:0007420', 'GO:0009416', 'GO:0007215', 'GO:0045944', 'GO:0014070', 'GO:0065003', 'GO:00…	24
Contig004608	['GO:0010951']	0
Contig000829	['GO:0005977', 'GO:0046822', 'GO:0051301', 'GO:0045786', 'GO:0032922', 'GO:0005975', 'GO:0042752', 'GO:0043153', 'GO:0006470', 'GO:0010468', 'GO:0051726']	7
Contig015696	['GO:0007186', 'GO:0007602', 'GO:0071482', 'GO:0009416', 'GO:0050896', 'GO:0009584', 'GO:0007601']	6
Contig008921	['GO:0039536', 'GO:0043010', 'GO:1904888', 'GO:0009968', 'GO:0045893', 'GO:0050687', 'GO:0001818', 'GO:0010629', 'GO:0039535', 'GO:0032480']	5
Contig007106	['GO:0006479', 'GO:0044237', 'GO:0032259', 'GO:0018023', 'GO:0036211']	2
Contig014291	[]	0
Contig007334	['GO:0009090', 'GO:0008152', 'GO:0009088', 'GO:1901605', 'GO:0009067', 'GO:0006520', 'GO:0016310', 'GO:0008652', 'GO:0030639', 'GO:0044281', 'GO:0009089', '', 'GO:0017000']	5
Contig009897	['GO:2000045', 'GO:0009059', 'GO:0000278', 'GO:0008152', 'GO:0000082', 'GO:0045786', 'GO:0006139', 'GO:2000134', 'GO:0050793', 'GO:0007049', 'GO:2000773', 'GO:0043170', 'GO:0010629', 'GO:0030154', 'GO:0051726', 'GO:0043550', 'GO:0045930', 'GO:0051301', 'GO:0000122', 'GO:0051302', 'GO:0006325', 'GO:0009058', 'GO:0006357']	14
Contig002458	['GO:0009408', 'GO:0060261', 'GO:0045893', 'GO:0032968', 'GO:0051123', 'GO:0032496', 'GO:0006351', 'GO:0006357', 'GO:0006366', 'GO:0060260']	7
Contig013095	['GO:0061833', 'GO:0008104', 'GO:0031016', 'GO:0010669', 'GO:0090277', 'GO:0030072', 'GO:1990830', 'GO:0043484', 'GO:0070542', 'GO:0051649', 'GO:1904274', 'GO:0010468', 'GO:0006897']	5
Contig011608	['GO:0022414', 'GO:0060070', 'GO:0002244', 'GO:0034504', 'GO:0048856', 'GO:0007289', 'GO:0045944', 'GO:0001822', 'GO:0016055', 'GO:0007286']	7
Contig008513	['GO:0000724', 'GO:0008284', 'GO:0061053', 'GO:0010971', 'GO:0006281', 'GO:0051726']	4
Contig000563	['GO:0048172', 'GO:0016236', 'GO:0090150', 'GO:0007420', 'GO:0051966', 'GO:1903296', 'GO:0043087', 'GO:0060079', 'GO:0097051', 'GO:0034389', 'GO:0043010', 'GO:0046928', 'GO:0017157', 'GO:1903061', 'GO:0048168', 'GO:0001956', 'GO:1903233', 'GO:0007268', 'GO:0060325', 'GO:0070972', 'GO:2000786', 'GO:0061646', 'GO:0032483', 'GO:0008104', 'GO:0010628', 'GO:0060627', 'GO:0009987', 'GO:0010807', 'GO:00…	14
Contig012037	['GO:0042255', 'GO:0032543', 'GO:0042254', 'GO:0010467', 'GO:0006412', 'GO:0070925']	3
Contig015863	['GO:0045930', 'GO:0007015', 'GO:0008285', 'GO:2000045', 'GO:0030050', 'GO:0048812', 'GO:0045786', 'GO:0035556', 'GO:2000134', 'GO:0048731', 'GO:0021549', 'GO:0030182', 'GO:0043491', 'GO:0051726']	8
Contig000425	['GO:0007186', 'GO:0009653', 'GO:0009416', 'GO:0043153', 'GO:0050960', 'GO:0050896', 'GO:0016038', 'GO:0007603', 'GO:0043010', 'GO:0042752', 'GO:0071482', 'GO:0016037', 'GO:0045938', 'GO:0009584', 'GO:0007634', 'GO:0001654', 'GO:1990384', 'GO:0016056', 'GO:0048511', 'GO:0007601', 'GO:0007602', 'GO:0043052']	12
Contig007952	['GO:0008285', 'GO:0045892', 'GO:0042127', 'GO:0030316', 'GO:0045778', 'GO:0010468', 'GO:0007292', 'GO:0045671']	4
Contig006187	['GO:0009306', 'GO:0060828', 'GO:0048193', 'GO:0072659', 'GO:0007031', 'GO:0017157', 'GO:0006904', 'GO:0150115', 'GO:0008104', 'GO:0031346', 'GO:0016192', 'GO:0045046', 'GO:0019882', 'GO:0048210', 'GO:0032456', 'GO:0006612', 'GO:0051461', 'GO:0051641', 'GO:0015031']	13
Contig006853	['GO:0071312', 'GO:0007186', 'GO:0051385', 'GO:0043279', 'GO:0007198', 'GO:1903351', 'GO:0007631', 'GO:0014059', 'GO:0099509', 'GO:0098664', 'GO:0071466', 'GO:1901698', 'GO:0007210', 'GO:0042756', 'GO:0099171', 'GO:0051967', 'GO:0009636', 'GO:0007268', 'GO:0042127', 'GO:0007193', 'GO:0097746', 'GO:0007200', 'GO:0042310', 'GO:0014063', 'GO:0042220', 'GO:0071502', 'GO:0032229', 'GO:0014053', 'GO:00…	12
Contig000874	['GO:0072344', 'GO:0006415', 'GO:0006417', 'GO:0010467', 'GO:0010468', 'GO:0006412']	5
Contig012597	['GO:1990403', 'GO:0035050']	0
Contig007962	['GO:0030278', 'GO:1990402', 'GO:0001890', 'GO:0001525', 'GO:0035162', 'GO:0021591']	1
Contig000233	['GO:0070536', 'GO:0070646', 'GO:0016579', 'GO:0060027', 'GO:0071108', 'GO:0006508']	1
Contig003788	['GO:0006493', 'GO:0006629', 'GO:0001835', 'GO:0001574', 'GO:0016051', 'GO:0006491', 'GO:0005975', 'GO:0097503', 'GO:0048856', 'GO:0006486', 'GO:0009247', 'GO:0009311', 'GO:0009100']	6
Contig013075	['GO:0072384', 'GO:0006998', 'GO:0090435', 'GO:0010761', 'GO:0007097', 'GO:0051642', 'GO:0030473', 'GO:0007018']	1
Contig015433	['GO:0071902', 'GO:0043549', 'GO:0033138', 'GO:0001934']	1
Contig015930	['GO:0032543', 'GO:0006412', 'GO:0010467']	2
Contig003825	['GO:0046037', 'GO:0002376', 'GO:0016310', 'GO:0035082', 'GO:0030154', 'GO:0007283', 'GO:0009966', 'GO:0045087', 'GO:0008152', 'GO:0046710']	9
Contig006565	['GO:0098880', 'GO:0045124', 'GO:0050748', 'GO:0070374', 'GO:0150054', 'GO:0032369', 'GO:0014911', 'GO:0014909', 'GO:0007160', 'GO:0033627', 'GO:2000406', 'GO:1903053', 'GO:0007596', 'GO:1905598', 'GO:0098609', 'GO:0034113', 'GO:0009314', 'GO:0000902', 'GO:0038027', 'GO:0042060', 'GO:0048008', 'GO:0046850', 'GO:0051279', 'GO:0034446', 'GO:1901163', 'GO:0045672', 'GO:0043549', 'GO:0009966', 'GO:00…	19
Contig014187	['GO:0043154', 'GO:0042177', 'GO:0043066', 'GO:0035455', 'GO:0031054', 'GO:1901799', 'GO:0016070', 'GO:0035196', 'GO:0031053', 'GO:0090304', 'GO:0010506', 'GO:0008033', 'GO:0034097', 'GO:0002376', 'GO:0006396', 'GO:0006397', 'GO:0008104', 'GO:0010628', 'GO:0010629', '', 'GO:0002250', 'GO:0006364', 'GO:1903900', 'GO:0010467', '', 'GO:0010468', 'GO:0072594', 'GO:0006508']	14
Contig008248	['GO:0007178', 'GO:0007507', 'GO:0007179', 'GO:0009888', 'GO:0016310', 'GO:0009653', 'GO:0006915', 'GO:0006468', 'GO:0032924', 'GO:0071363', 'GO:0030154']	8
Contig008466	['GO:0006629', 'GO:0048015', 'GO:0035556', 'GO:0016042']	4
Contig013128	['GO:0048568', 'GO:0051640', 'GO:0031175', 'GO:0032501', 'GO:0007420', 'GO:0016197', 'GO:1990403', 'GO:0043087', 'GO:0051649', 'GO:0046386', 'GO:0007399', 'GO:0099041', 'GO:0032502', 'GO:0050727', 'GO:0016192', 'GO:0042147', 'GO:0009264', 'GO:0032755', 'GO:0032680', 'GO:0032388', 'GO:0030182']	11
Contig006670	['GO:0000729', 'GO:0006281', 'GO:0000278', 'GO:0044818', 'GO:0008283', 'GO:0008152', 'GO:1904354', 'GO:0046597', 'GO:0030174', 'GO:0031954', 'GO:0006974', 'GO:0090656', 'GO:0050885', 'GO:0045190', 'GO:0035825', 'GO:0097193', 'GO:0048145', 'GO:0032206', 'GO:0000724', 'GO:0001832', 'GO:0000077', 'GO:0007049', 'GO:0031860', 'GO:0090737', 'GO:0045665', 'GO:0007095', 'GO:0110025', 'GO:0030330', 'GO:00…	16
Contig009875	['GO:0009888', 'GO:0016477', '', 'GO:0043542', 'GO:0061484', 'GO:0045446', 'GO:0043066', 'GO:0030510', 'GO:0030154']	3
Contig002236	['GO:0051259', 'GO:1902260', 'GO:0051260', 'GO:0034765']	3
Contig010442	['GO:0043247', 'GO:0031297', 'GO:0006281', 'GO:1904358', 'GO:1902990', 'GO:1904506', 'GO:0008152', 'GO:1904355', 'GO:0006974', 'GO:0019222', 'GO:0010569', 'GO:0006139', 'GO:0006260', 'GO:0006355', 'GO:0061820', 'GO:0016043', 'GO:0032206', 'GO:1904430', 'GO:0051276', 'GO:0045910', 'GO:0032392', 'GO:1904535', 'GO:2000779', 'GO:0000723', 'GO:0006310', 'GO:0006259', 'GO:0032508', 'GO:0010468', 'GO:00…	16
Contig005052	['GO:0007155', 'GO:0070830', 'GO:0000278']	3
Contig014292	['GO:0015871', 'GO:0035725', 'GO:0008292', 'GO:0055085']	2
Contig008184	['GO:0006888', 'GO:0070863', 'GO:0070973', 'GO:0007030', 'GO:0007029', 'GO:0010628', 'GO:0016192', 'GO:0048208', 'GO:0046907', 'GO:0007031', 'GO:0065003', 'GO:0006914', 'GO:0016559', 'GO:0015031']	10
Contig004002	['GO:0032456', 'GO:0002821', 'GO:0010628', 'GO:0001819', 'GO:2000553', 'GO:0002253', 'GO:0050776', 'GO:0050852', 'GO:0050790', 'GO:0006897', 'GO:0043547', 'GO:0015031']	7
Contig011664	['GO:0032543', 'GO:0006412']	2
Contig009343	['GO:0051301', 'GO:0035694', 'GO:0006123', 'GO:0030163', 'GO:0006515', 'GO:0007005', 'GO:0006508']	6
Contig003159	['GO:0006383', 'GO:0007417', 'GO:0042254', 'GO:0042273', 'GO:0006355', 'GO:0006357', 'GO:0009303']	5
Contig010290	['GO:0098703', 'GO:0070509', 'GO:0055074', 'GO:0051592', 'GO:0006816', 'GO:0017158', 'GO:0034220', 'GO:1902656', 'GO:0070588', 'GO:0035898', 'GO:0098655', 'GO:0051289', 'GO:0006811', 'GO:0055085']	7
Contig002045	['GO:0051028', 'GO:0010467', 'GO:0016973', 'GO:0006406', 'GO:0006913']	5
Contig000527	['GO:0008285', 'GO:0045786']	1
Contig009907	['GO:0098962', 'GO:0023052']	1
Contig006998	['GO:0061098', 'GO:0007173', 'GO:0048856', 'GO:0045741', 'GO:0038127', 'GO:0007275', 'GO:0007399', 'GO:0035556', 'GO:0048513', 'GO:0038138', 'GO:0045840', 'GO:0001934', 'GO:0038130', 'GO:0030154', 'GO:0008284', 'GO:0061097', 'GO:0007171', 'GO:0050919']	10
Contig003558	['GO:0045786', 'GO:0000122', 'GO:0007049']	3
Contig009047	['GO:0006914', 'GO:0060340', 'GO:0002376', '', 'GO:0051865', 'GO:0036503', 'GO:0045087', 'GO:0016567', 'GO:0045732', 'GO:0036503', 'GO:0006511', 'GO:0044314', 'GO:1904294', 'GO:0051607', 'GO:0036503', 'GO:0006508']	9
Contig000367	['GO:0097237', 'GO:0045454', 'GO:0006979', 'GO:0009966', 'GO:0051775', 'GO:0071451', 'GO:0006355', 'GO:0034599', 'GO:0032502', 'GO:0006915', 'GO:0022900', '', '', 'GO:0030154', 'GO:0042262', 'GO:0009266', 'GO:0042542', 'GO:0006749', 'GO:0098754']	9
Contig007416	['GO:0070972', 'GO:0009267', 'GO:0008104', 'GO:0019222', 'GO:0000045', 'GO:0016236', 'GO:0042177', 'GO:0048193', 'GO:0000422', 'GO:0032781', 'GO:0006891', 'GO:1901799', 'GO:0006995', 'GO:0051641', 'GO:0006914', 'GO:0007005', 'GO:0015031']	10
Contig007915	['GO:0007131', 'GO:0006281', 'GO:0045944', 'GO:2001014', 'GO:0051607', 'GO:0016070', 'GO:0000380', 'GO:0045445', 'GO:0061614', 'GO:0008380', 'GO:0007127', 'GO:0030521', 'GO:0006355', 'GO:0042255', 'GO:0002376', 'GO:0006396', 'GO:0006397', 'GO:0007049', 'GO:0010468', 'GO:0010586', 'GO:0051321', 'GO:0006364', 'GO:0030520', 'GO:0001837', 'GO:0031047', 'GO:0010467', 'GO:0000381', 'GO:0006259', 'GO:00…	20
Contig001605	['GO:0008053', 'GO:0048856', 'GO:0060348', 'GO:0007005']	4
Contig005240	['GO:0008594', 'GO:0030182']	1
Contig004814	['GO:2000045', 'GO:0031175', 'GO:1904761', 'GO:0007059', 'GO:0014009', 'GO:0048667', 'GO:0045842', 'GO:0048666', 'GO:0007064', 'GO:0031290', 'GO:0045892', 'GO:0045879', 'GO:0021554', 'GO:0090230', 'GO:2000134', 'GO:0050673', 'GO:0000902', 'GO:0043353', 'GO:0009968', 'GO:2000679', 'GO:0071459', 'GO:0007265', 'GO:0045840', 'GO:0030154', 'GO:0051726', 'GO:0071922', 'GO:0007283', 'GO:0043433', 'GO:00…	24
Contig005702	[]	0
Contig007389	['GO:0097750', 'GO:0007029', 'GO:0016197', 'GO:0140285', 'GO:0090148']	2
Contig005636	[]	0
Contig004652	[]	0
Contig008975	['GO:0006414', 'GO:0006368', 'GO:0006351', 'GO:0006357', 'GO:0006366', 'GO:0006367', 'GO:0006412']	4
Contig005564	['GO:0007040']	1
Contig011272	['GO:0006629', 'GO:0006633', 'GO:0015936', 'GO:0006695', 'GO:0006085', 'GO:0006101', 'GO:0008610', 'GO:0006107', 'GO:0008152', 'GO:0006631']	8
Contig004502	['GO:0007130', 'GO:0007131', 'GO:0008104', 'GO:0006974', 'GO:0006298', 'GO:0006281', 'GO:0007140', 'GO:0007144']	6
Contig002541	['GO:0034654', 'GO:0010613', 'GO:0006753', 'GO:0016310', 'GO:0032263', 'GO:0106383', 'GO:0046085', 'GO:0006796', 'GO:0005975', 'GO:0009156', 'GO:0044209', 'GO:0044342', 'GO:0006166', 'GO:0006144', 'GO:0006175', 'GO:0042102']	8
Contig010681	['GO:0043009', 'GO:0032147', 'GO:0051301', 'GO:0035329', 'GO:0007417', 'GO:0016310', 'GO:0043549', 'GO:0001756', 'GO:0035556', 'GO:0001934', 'GO:0008283']	5
Contig009904	['GO:0097250', 'GO:0007005', 'GO:0065003']	2
Contig011312	['GO:0090325', 'GO:0090326', 'GO:1901046', 'GO:2000292', 'GO:0032502', 'GO:1990502', 'GO:1904811', 'GO:0046662', 'GO:0001701', 'GO:0090630', 'GO:0061065', 'GO:0043547']	2
Contig005837	['GO:1900753', 'GO:0006935', 'GO:0001702', 'GO:0032489', 'GO:0030036', 'GO:0042908', 'GO:0007264', 'GO:1990961', 'GO:0043087', 'GO:0051179', 'GO:0035556', 'GO:0001934', 'GO:0050790', 'GO:0006897', 'GO:0043547', 'GO:0090141', 'GO:0055085']	11
Contig000237	['GO:0018105', 'GO:0016310', 'GO:0043536', 'GO:0048854', 'GO:0006468', 'GO:0048873', 'GO:0045766', 'GO:0090050', 'GO:1905564', 'GO:0035556', 'GO:0001938', 'GO:0000002', 'GO:2000773', 'GO:0032008', 'GO:0032869', 'GO:0010765', 'GO:0018107', 'GO:1905653', 'GO:0045793']	5
Contig005494	['', 'GO:0008152', 'GO:0006508', 'GO:0007275', 'GO:0048286', 'GO:0043161', 'GO:1901698', 'GO:0005975', 'GO:0006491', 'GO:0034976', 'GO:0007585', 'GO:0048856', 'GO:0006486', 'GO:0006511', 'GO:0036503', 'GO:0009100', 'GO:0036508']	9
Contig000200	['GO:0005975', 'GO:2000060', 'GO:0016567', 'GO:0032436', 'GO:0045732', 'GO:0065003', 'GO:0032434']	5
Contig012419	[]	0
Contig004456	['GO:0006635', 'GO:0006629', 'GO:0044255', 'GO:0009410', 'GO:0008152', 'GO:0032868', 'GO:0009617', 'GO:0035965', 'GO:0006631']	7
Contig001968	['GO:0008285', 'GO:0045892', 'GO:0050810', 'GO:0006397', 'GO:0000244', 'GO:0000122', 'GO:0043065', 'GO:0008380', 'GO:0006396', 'GO:0042981', 'GO:0010467', 'GO:0048477', 'GO:0000387', 'GO:0065003']	11
Contig015099	['GO:0032259', 'GO:0006479']	1
Contig003998	['GO:0072378', 'GO:0007596', 'GO:0018149', 'GO:0042060', 'GO:0007599']	2
Contig004793	['GO:2000758', 'GO:0006085', 'GO:0060997', 'GO:0007399', 'GO:0010629']	3
Contig006715	['GO:0003333', 'GO:0015711', 'GO:0006814', 'GO:0015807', 'GO:1902475', 'GO:0006811', 'GO:0006865']	4
Contig003167	['GO:0060765', 'GO:0070936', 'GO:0030517', 'GO:0045595', 'GO:0000209', 'GO:0001558', 'GO:0045893', 'GO:0016567', 'GO:0010977', 'GO:0022008', 'GO:0009966', 'GO:0048675', 'GO:0006511', 'GO:0006355', 'GO:0044314', 'GO:0085020', 'GO:0006508']	8
Contig014732	[]	0
Contig010832	['GO:0002084', 'GO:0042159', 'GO:0098734', 'GO:0042997']	1
Contig003168	['GO:0050908', 'GO:0031175', 'GO:0061092', 'GO:0048666', 'GO:0010976', 'GO:0006869', 'GO:0050884', 'GO:0043588', 'GO:0060052', 'GO:0140331', 'GO:0010842', 'GO:0042755', 'GO:0010996', 'GO:0034204', '', 'GO:0008285', 'GO:0003011', 'GO:0042472', 'GO:0040018', 'GO:0007409', 'GO:0045332', 'GO:0015914', 'GO:0030182']	8
Contig014043	['GO:0071260', 'GO:0016310', 'GO:0072709', 'GO:0061049', 'GO:0006468', 'GO:0048856', 'GO:0046330', 'GO:0051770', 'GO:0043507', 'GO:0034393', 'GO:0000165', 'GO:2000672', 'GO:0018108', 'GO:0043065', 'GO:0045740', 'GO:0006915', 'GO:0009611', 'GO:0043525', 'GO:0001934', 'GO:0007254']	9
Contig009109	['GO:0043123', 'GO:0002376', 'GO:0030030', 'GO:0016310', 'GO:0006468', 'GO:0035556', 'GO:0009617', 'GO:0045087', 'GO:0002753', 'GO:0060271']	7
Contig011287	['GO:0016310', 'GO:0033210', 'GO:1904685', 'GO:0032355', 'GO:0010730', 'GO:0043434', 'GO:0006952', 'GO:0045893', 'GO:0048708', 'GO:0042593', 'GO:0051726', 'GO:0045747', 'GO:0010507', 'GO:0042789', 'GO:0070102', 'GO:0060396', 'GO:0006366', 'GO:0019953', 'GO:0032870', 'GO:0006953', 'GO:0044321', 'GO:0045944', 'GO:0008283', 'GO:0009725', 'GO:0045766', 'GO:0060019', 'GO:0006606', 'GO:1905564', 'GO:00…	26
Contig014148	['GO:0007517']	1
Contig007262	['GO:0032259']	1
Contig000808	['GO:0060326', 'GO:0006629', 'GO:0019542', 'GO:0016477', 'GO:0043154', 'GO:0008610', '', 'GO:0006351', 'GO:0045944', 'GO:0019413', 'GO:0050896', 'GO:0008152', 'GO:0001975', 'GO:0001525', 'GO:0035914', 'GO:0045786', 'GO:0006085', 'GO:0044344', 'GO:0035924', 'GO:0061469', 'GO:0051602', 'GO:0000226', 'GO:0071363', 'GO:0006355', 'GO:0030522', 'GO:0036211', 'GO:0035767', 'GO:0044255', 'GO:0006397', 'G…	28
Contig012818	['GO:0015698', 'GO:0006811', 'GO:0098656']	2
Contig015681	['GO:0090090', 'GO:0030178', 'GO:0001889', 'GO:0009966', 'GO:0090263', 'GO:2000272', 'GO:0048884', 'GO:0016055']	6
Contig001414	['GO:2001237', 'GO:0016477', 'GO:0043154', 'GO:2000514', 'GO:0046330', 'GO:0009966', 'GO:0022008', 'GO:0043066', 'GO:0032434', 'GO:0016567', 'GO:0045732', 'GO:2000564', 'GO:0042127', 'GO:0045595', 'GO:0009968', 'GO:2000060', 'GO:0045580', 'GO:0032436', 'GO:0043410', 'GO:0043370', 'GO:0042129', 'GO:0051865', 'GO:0001764']	13
Contig000507	['GO:0043085', 'GO:0050864', 'GO:0051174', 'GO:0032147', 'GO:0045595', 'GO:0019222', 'GO:0048536', 'GO:0002759', 'GO:0051900', 'GO:0030865', 'GO:0048856', 'GO:0019222', 'GO:0043029', 'GO:0000226', 'GO:0035303', 'GO:0001782', 'GO:0045579']	4
Contig008966	['GO:0015908']	1
Contig006632	['GO:0001568', 'GO:0045765', 'GO:0001525', 'GO:0019222', 'GO:0007275', 'GO:0090210', 'GO:0001955', 'GO:0010951', 'GO:0050793', 'GO:0007566', 'GO:0035115', 'GO:1904684', 'GO:0016055', 'GO:0045595', 'GO:0060070', 'GO:0010466', 'GO:0030336', 'GO:0090263', 'GO:0002040', 'GO:0035239', 'GO:0030198']	8
Contig012649	['GO:0007080', 'GO:0000280', 'GO:0007052', 'GO:0051225', 'GO:0000278', 'GO:0007019', 'GO:0097435', 'GO:0048731', 'GO:0031109', 'GO:0007018']	4
Contig015371	['GO:2001237', 'GO:0042297', 'GO:0000132', 'GO:2000047', 'GO:0099111', 'GO:0051216', '', 'GO:1904504', 'GO:0006890', 'GO:0047496', 'GO:1905289', 'GO:2000479', 'GO:0045724', 'GO:0090017', 'GO:0021954', 'GO:0043065', 'GO:0071698', 'GO:0006915', 'GO:0031550', 'GO:0006879', 'GO:0048884', 'GO:0031587', 'GO:0007018', 'GO:0048703', 'GO:0001841', 'GO:1905337', 'GO:0007030', 'GO:1903599', 'GO:0031648']	7
Contig005302	['GO:0060326', 'GO:0016477', 'GO:0001833', 'GO:0000278', 'GO:0048534', 'GO:0007052', 'GO:0048539', 'GO:0030595', 'GO:0002244', 'GO:0042254', 'GO:0031017', 'GO:0070925', 'GO:0006364', 'GO:0030282', 'GO:0002573', 'GO:0009888', 'GO:0030851', 'GO:0042256', 'GO:0010467', 'GO:0060348']	9
Contig005510	['GO:0006364', 'GO:0006396', 'GO:0000470', 'GO:0008284', 'GO:0032259', 'GO:0070475', 'GO:0001510', 'GO:0042254', 'GO:0042273', 'GO:0010467', 'GO:0000027', 'GO:1901796', 'GO:0001825', 'GO:0008033']	10
Contig008045	['GO:0042327']	0
Contig004019	[]	0
Contig002133	['GO:0048856', 'GO:0043549', 'GO:0048666', 'GO:0098742', 'GO:0033138', 'GO:0090316', 'GO:0007157', 'GO:0043406', 'GO:0006359', 'GO:0007399', 'GO:0006355', 'GO:0045859', 'GO:0007155', 'GO:0051493', 'GO:0006955', 'GO:0001934', 'GO:0043410', 'GO:0032956', 'GO:0008285', 'GO:0051491', 'GO:0007218', 'GO:0010468', 'GO:0030838', 'GO:0030182']	13
Contig009315	[]	0
Contig000791	[]	0
Contig012939	['GO:0002376', 'GO:0006313', 'GO:0006310', 'GO:0002474', 'GO:0050853', 'GO:0019731', 'GO:0042742', 'GO:0002455', 'GO:0032196', 'GO:0006911', 'GO:0006958', 'GO:0050776', 'GO:0050871', 'GO:0045087', 'GO:0016064', 'GO:0002250', 'GO:0006910']	9
Contig012138	['GO:0016310', 'GO:0000278', 'GO:0048856', 'GO:0051457', 'GO:0033365', 'GO:0070936', 'GO:0019222', 'GO:0000209', 'GO:1904668', 'GO:0016567', 'GO:0051128', '', 'GO:0006513', 'GO:0010564', 'GO:0006338', 'GO:0008104', 'GO:0007346', 'GO:0051276', 'GO:0010629', 'GO:0051726', 'GO:0033043', 'GO:0006511', 'GO:0051641', 'GO:0051247', 'GO:0031146', 'GO:0006508']	14
Contig008151	['GO:0032259', 'GO:0030488', 'GO:0008344', 'GO:0001510', 'GO:0002940', 'GO:0010467', 'GO:0030534', 'GO:0007610', 'GO:0008033']	4
Contig013255	['GO:0015031', 'GO:0010667', 'GO:0043001', 'GO:0046907', 'GO:0072383', 'GO:0061698', 'GO:0002931', 'GO:0047496', 'GO:0032438', 'GO:0031667', 'GO:2000377', 'GO:0048731', 'GO:0006886', 'GO:0036048', 'GO:0032465', 'GO:0008104', 'GO:0008333', 'GO:0007049', 'GO:2000378', 'GO:0016192', 'GO:1904229', 'GO:0006476', 'GO:0032880', 'GO:0035459', 'GO:0009889', 'GO:0007018', 'GO:0010566', 'GO:0036047', 'GO:00…	11
Contig005613	['GO:0006261', 'GO:0000724', 'GO:0006974', 'GO:0042276', 'GO:0006281', 'GO:0006259', 'GO:0006260', 'GO:0019985']	8
Contig014625	[]	0
Contig014008	['GO:0007178', 'GO:0016601', 'GO:0006468', 'GO:0007265', 'GO:0035556', 'GO:0007264']	3
Contig013780	['GO:0070534', 'GO:0016310', 'GO:0043410', 'GO:0042981', 'GO:0043122', 'GO:0006915', 'GO:0016567', 'GO:0046330', 'GO:2001236', 'GO:0009966', 'GO:0006355', 'GO:0051092', 'GO:0010468', 'GO:0033209', 'GO:0065003', 'GO:0034097']	12
Contig006460	['GO:0006914', 'GO:0009267', 'GO:0008104', 'GO:0000045', 'GO:0000422', 'GO:0044804', 'GO:0006497', 'GO:0051641', 'GO:0034497', 'GO:0007005']	6
Contig001846	['GO:0007283', 'GO:0030154']	2
Contig008269	['GO:0015787', 'GO:0015711', 'GO:0008643', 'GO:0098656', 'GO:0007275', 'GO:0048706', 'GO:0090481', 'GO:0009101', 'GO:0048856', 'GO:1990569', 'GO:0015789', 'GO:0030206', 'GO:0055085']	7
Contig000828	['GO:0048193', 'GO:0016192', 'GO:0034976', 'GO:0007283', 'GO:0036158', 'GO:0015031', 'GO:0003341', 'GO:0065003', 'GO:0043001', 'GO:0030154', 'GO:0007286', 'GO:0060271']	11
Contig001525	['GO:0006397']	1
Contig005565	['GO:0006685', 'GO:0006684', 'GO:0009143', 'GO:0008152']	3
Contig008305	['GO:0006357', 'GO:0007638', 'GO:0048935', 'GO:0045893', 'GO:0048856', 'GO:0030182', 'GO:0007517', 'GO:0007411', 'GO:0045944', 'GO:0006355', 'GO:0006366', 'GO:0006351', 'GO:0030154']	10
Contig010579	['GO:1902600', 'GO:0030030', 'GO:0060041', 'GO:0007420', 'GO:0051179', 'GO:0045851', 'GO:0007034', 'GO:0036295', 'GO:0051453', 'GO:0032438', 'GO:0039022', 'GO:0035675', 'GO:0006811', 'GO:0060271', 'GO:0008057', 'GO:0001947', 'GO:0032502', 'GO:0097401', 'GO:0006879', 'GO:0003406', 'GO:0016241', 'GO:0070986', 'GO:0046688', 'GO:0007035']	11
Contig007477	['GO:0010874', 'GO:0090304', 'GO:0006281', 'GO:0010875']	2
Contig005990	['GO:0030218', 'GO:1901224', 'GO:0045739', 'GO:1902229', 'GO:0031334', 'GO:0006281', 'GO:0007059', 'GO:0001819', 'GO:0032079', 'GO:0031397', 'GO:0043549', 'GO:0009966', 'GO:0006413', 'GO:0043507', 'GO:0051225', 'GO:0043009', 'GO:0006974', 'GO:0019222', 'GO:0032743', 'GO:0061481', 'GO:1990090', 'GO:0050671', 'GO:0050776', 'GO:0051092', 'GO:0006355', 'GO:0006412', 'GO:0045859', 'GO:0090304', 'GO:19…	21
Contig008709	['GO:0009798', 'GO:0007178', 'GO:0060412', 'GO:0072520', 'GO:0072134', 'GO:0030513', 'GO:0003190', 'GO:0001541', 'GO:0051098', 'GO:0008584', 'GO:0017015', 'GO:0048729', 'GO:0045892', 'GO:0070373', '', 'GO:0035556', 'GO:0060956', 'GO:0062009', 'GO:0042733', 'GO:0030325', 'GO:0070371', 'GO:0048733', 'GO:0030509', 'GO:0045893', 'GO:0006879', 'GO:0042060', 'GO:0030154', 'GO:0022414', 'GO:0009888', 'G…	36
Contig000421	['GO:0001578', 'GO:0000226']	1
Contig005940	['GO:0006082', 'GO:0009063', 'GO:0016052', 'GO:0005975', '', 'GO:0016052']	1
Contig004335	['GO:0008285', 'GO:0022407', 'GO:0009887', 'GO:0045595', 'GO:0042981', 'GO:0001654', 'GO:0001932', 'GO:0014013', 'GO:0009966', 'GO:0035330', 'GO:0022008', 'GO:0051726']	5
Contig012465	['GO:0016567']	1
Contig013061	['GO:0060226', 'GO:0060223', 'GO:0060040', 'GO:1902870', 'GO:0045595', 'GO:0045665', 'GO:0060019', 'GO:0010468', 'GO:0045664', 'GO:0045893', 'GO:0045686', 'GO:0045596', 'GO:0030182', 'GO:0045944', 'GO:0006355', 'GO:0030154']	7
Contig004759	['GO:0007080', 'GO:0008608', 'GO:0000226']	2
Contig008715	['GO:0032456', 'GO:0007015', 'GO:0061564', 'GO:0030050', 'GO:0098856', 'GO:0048546', 'GO:0099518', 'GO:0043588', 'GO:0030036', 'GO:0016192', 'GO:0016197', 'GO:0002244', 'GO:0003245', 'GO:0060216', 'GO:0048731', 'GO:0003242', 'GO:0008361', 'GO:0015031']	8
Contig002617	['GO:0061098', 'GO:0031175', 'GO:0045739', 'GO:0033141', 'GO:0006281', 'GO:1905168', 'GO:0010224', 'GO:0009416', '', 'GO:0006979', 'GO:0000303', 'GO:0022008', 'GO:0045944', 'GO:0097680', 'GO:0006362', 'GO:0008630', 'GO:0006284', 'GO:0032147', 'GO:0006974', 'GO:0002230', 'GO:0045945', 'GO:0007399', 'GO:0009636', 'GO:0006338', 'GO:0000077', 'GO:0010628', 'GO:0006303', 'GO:0060261', 'GO:0045893', 'G…	26
Contig007966	[]	0
Contig002070	['GO:0043388', '', 'GO:0006397', 'GO:0060538', 'GO:0016556', 'GO:0031099', 'GO:0043697', 'GO:0001947', 'GO:0140291', 'GO:0016554', 'GO:0009972', 'GO:0008152', 'GO:0070654']	4
Contig003010	['GO:0032456', 'GO:0032465', 'GO:0051301', 'GO:0007049', 'GO:0006355', 'GO:0051726']	5
Contig005473	['GO:0010608', 'GO:0008152', 'GO:0008152', 'GO:0008152', 'GO:0016556', 'GO:1905869', 'GO:0048024', 'GO:0006556', 'GO:0032259', 'GO:0070475', 'GO:0061157', 'GO:0001510', 'GO:0120049', 'GO:0010629', 'GO:0006402', 'GO:0044238', 'GO:0010467', 'GO:0010468', '']	9
Contig007367	['GO:0007059', 'GO:0016197', 'GO:0042267', 'GO:1902774', 'GO:0001845', 'GO:0090117', 'GO:1990927', 'GO:0098930', 'GO:0090385', 'GO:0045087', 'GO:0061909', 'GO:0008104', 'GO:0008333', 'GO:0007049', 'GO:0016192', 'GO:0008089', 'GO:0001778', 'GO:0046754', 'GO:0030301', 'GO:0051301', 'GO:0002747', 'GO:0032418', 'GO:0051641', 'GO:0002505', 'GO:0015031']	8
Contig000188	['GO:0045930', 'GO:0030174', 'GO:0006974', 'GO:0007049', 'GO:0045786', 'GO:0006281', 'GO:0000278', 'GO:0007095', 'GO:0006275', 'GO:0033314', 'GO:0006260', 'GO:0000076', 'GO:0035556', 'GO:0051726', 'GO:0010389', 'GO:0010212']	15
Contig011679	['GO:0097370', 'GO:0006493', 'GO:0018243']	1
Contig011016	['GO:0007015', 'GO:0016601', 'GO:0048812', 'GO:0050808', 'GO:0022008', 'GO:0010976', 'GO:0050803', 'GO:0065003', 'GO:0048814', 'GO:0022604', 'GO:0050769', 'GO:0098974', 'GO:0071800', 'GO:0035556', 'GO:0061003', 'GO:0007264', 'GO:0007399', 'GO:0050790', 'GO:0016043', 'GO:0006897', 'GO:0030031', 'GO:0051493', 'GO:0002376', 'GO:0045595', 'GO:0030036', 'GO:0001558', 'GO:0010770', 'GO:0007265', 'GO:00…	17
Contig002812	['GO:0050731', 'GO:0031175', 'GO:0016477', 'GO:0007166', 'GO:0009653', 'GO:0035860', 'GO:0038179', 'GO:0007169', 'GO:0008584', 'GO:0030182', 'GO:0007399', '', 'GO:0001822', 'GO:0016043', '']	9
Contig007579	['GO:0007015', 'GO:0016477', 'GO:0007010', 'GO:0016310', 'GO:0007267', 'GO:0030036', 'GO:0042981', 'GO:0006915', 'GO:0072554', 'GO:0050871', 'GO:0006897', 'GO:0008360']	9
Contig004138	['GO:1903232', 'GO:0060155', 'GO:0016192', 'GO:0034145', 'GO:0034141', 'GO:0006886', 'GO:0015031']	3
Contig009651	['GO:0016311', 'GO:0005975', 'GO:0016567', 'GO:0044042', 'GO:0006470', '']	4
Contig013543	['GO:0098703', 'GO:0071312', 'GO:0006629', 'GO:0007204', 'GO:0048265', 'GO:0001774', 'GO:0003085', 'GO:0009268', 'GO:0050960', 'GO:0034605', 'GO:0070588', 'GO:0055085', 'GO:0060079', 'GO:0090212', 'GO:0014832', 'GO:0019233', 'GO:0006816', 'GO:0002790', 'GO:1990090', 'GO:0071363', 'GO:0050955', 'GO:0060454', 'GO:0006811', 'GO:0010917', '', 'GO:0001660', 'GO:0060083', 'GO:0043434', 'GO:0050954', 'G…	15
Contig005392	['GO:0006397', 'GO:0008380', 'GO:0010468', 'GO:0016310', 'GO:0043484', 'GO:0042113', 'GO:0006355']	6
Contig013213	['GO:0016310', 'GO:0046777', 'GO:0006468', 'GO:0043484', 'GO:0032526', 'GO:0045721', 'GO:0010468', '', 'GO:0018108', 'GO:0010212']	4
Contig009629	['GO:0000082', 'GO:0043170', 'GO:0016567', 'GO:0048856', '', 'GO:0006511', 'GO:0070588', 'GO:0097193', 'GO:0031146', 'GO:0006508']	7
Contig014368	['GO:1905627', 'GO:0048265', 'GO:0044237', 'GO:0045776', 'GO:0051000', 'GO:0006809', 'GO:0042311', 'GO:0051353', 'GO:0034341', 'GO:0065003', 'GO:0008152', 'GO:1901615', 'GO:2000121', 'GO:0008015', 'GO:0006066', 'GO:0009617', 'GO:0010460', 'GO:0051066', 'GO:0050884', 'GO:0046654', 'GO:0006729', 'GO:2000377', 'GO:0046653', 'GO:0045087', 'GO:0033555', 'GO:0006760', 'GO:0034097', 'GO:0050905', 'GO:19…	12
Contig015189	['GO:0007173', 'GO:0045453', 'GO:0046677', 'GO:0006468', 'GO:0043549', 'GO:0008584', 'GO:0023051', 'GO:0036120', 'GO:0043066', 'GO:0048259', 'GO:0006469', 'GO:0051897', 'GO:0006974', 'GO:0000209', 'GO:1990090', 'GO:0016567', 'GO:2000583', '', 'GO:0090650', 'GO:0048260', 'GO:0006513', 'GO:0009968', 'GO:0043303', 'GO:0042059', 'GO:0007175', 'GO:0010332', 'GO:0007166', 'GO:0060216', 'GO:0033574', 'G…	12
Contig000710	['GO:0043545', 'GO:0006777']	1
Contig000707	['GO:0051549', 'GO:0010628', 'GO:0030036', 'GO:0045785', 'GO:0042060', 'GO:0031032']	3
Contig000737	['GO:0030512', 'GO:0006357', 'GO:0045892', 'GO:0060633', 'GO:0000122', 'GO:0016925', '', 'GO:0045944', 'GO:0010468']	6
Contig003233	['GO:0046890', 'GO:0018105', 'GO:0006629', 'GO:0071477', 'GO:0070365', 'GO:0016310', 'GO:0070741', 'GO:0006094', 'GO:0005975', 'GO:0008610', 'GO:0097403', 'GO:1901615', 'GO:0006066', 'GO:1904640', 'GO:0009749', 'GO:0033993', 'GO:0046327', 'GO:0071377', 'GO:0071333', 'GO:0001889', 'GO:0031667', 'GO:0050776', 'GO:0006107', 'GO:0050801', 'GO:0071332', 'GO:0071407', 'GO:0071300', 'GO:0048545', 'GO:00…	19
Contig003431	['GO:0007186', 'GO:0019233', 'GO:0046882', 'GO:0007218', 'GO:0032277', 'GO:0046880']	2
Contig002188	['GO:0060078', 'GO:0051932', 'GO:0034220', 'GO:2001226', 'GO:0007214', 'GO:1902476', 'GO:0006821', 'GO:0050877', 'GO:0060079', 'GO:0042391', 'GO:0006811', 'GO:0007268']	8
Contig007311	[]	0
Contig002654	['GO:0051641', 'GO:0006903', 'GO:0000281', 'GO:0008104', 'GO:0006904', 'GO:0016192', 'GO:0048193', 'GO:0015031', 'GO:0051649', 'GO:0006893', 'GO:0006891', 'GO:0090522', 'GO:0046907', 'GO:0006892', 'GO:0016043', 'GO:0006886', 'GO:0090148', 'GO:0006887']	13
Contig014260	['GO:0000724', 'GO:0071479', 'GO:0006310', 'GO:0006974', 'GO:0010569', 'GO:0006281', 'GO:1905168', 'GO:0006334', 'GO:0036297', 'GO:0010845', 'GO:0051321']	9
Contig004603	['GO:0010951']	0
Contig004810	['GO:0048148', 'GO:0007204', 'GO:0007186', 'GO:0046890', 'GO:0006874', 'GO:0070374', 'GO:0045821', 'GO:0030431', 'GO:1903351', 'GO:0014824', 'GO:0014059', 'GO:0008219', 'GO:0009410', 'GO:0043406', 'GO:0014832', 'GO:0010513', 'GO:0098664', 'GO:0019233', 'GO:0043267', 'GO:0007210', 'GO:0035556', 'GO:0099171', 'GO:0051967', 'GO:0018108', 'GO:0007613', 'GO:0007268', 'GO:0046718', 'GO:0007200', 'GO:00…	15
Contig005355	['GO:0022414', 'GO:0007204', 'GO:0006828', 'GO:0051480', 'GO:0070301', 'GO:0051928', 'GO:0006812', 'GO:0006816', 'GO:0045666', 'GO:0032414', 'GO:0007338', 'GO:0010800', 'GO:0050774', 'GO:0070588', 'GO:0006811', 'GO:0055085']	9
Contig003355	['GO:0009435', 'GO:0070374', 'GO:0060749', 'GO:0002639', 'GO:0048534', 'GO:0060086', 'GO:0045892', 'GO:0007275', 'GO:0045226', 'GO:0009314', 'GO:0045859', 'GO:0032868', 'GO:0043410', 'GO:0043433', 'GO:0007584', 'GO:0046850', 'GO:0002548', 'GO:0043549', 'GO:0014070', 'GO:0070236', 'GO:0045779', 'GO:0032026', 'GO:0034097', 'GO:0042127', 'GO:0010468', 'GO:0006915', 'GO:0043627', 'GO:0006968', 'GO:00…	19
Contig005279	['GO:0031638', 'GO:0006897', 'GO:0030154', 'GO:0015031']	3
Contig001875	['GO:0050790']	0
Contig001028	['GO:0098869', 'GO:0006979', 'GO:0070887']	2
Contig010687	['GO:0052547', 'GO:0007156', 'GO:0043086', 'GO:0035556']	2
Contig000194	['GO:0006629', 'GO:0014909', 'GO:0008610', 'GO:0007340', 'GO:0032570', 'GO:0014912', 'GO:0071407', 'GO:0016042', 'GO:0044255', 'GO:0048545', 'GO:0046464', 'GO:0009611', 'GO:0030336', 'GO:0043401', 'GO:0051793', 'GO:0022414', 'GO:0051792', 'GO:0048240', 'GO:0007281', 'GO:0006631']	11
Contig001774	['GO:0046890', 'GO:0006629', 'GO:0042632', 'GO:0015721', 'GO:0045717', 'GO:0097306', 'GO:0006707', 'GO:0014070', 'GO:1901615', 'GO:0006066', 'GO:0009749', 'GO:0033993', 'GO:0006699', 'GO:0071333', 'GO:0006694', 'GO:0071407', 'GO:0038183', 'GO:0042593', 'GO:0045542', 'GO:0070859', 'GO:0032966', 'GO:0045471', 'GO:0071397', 'GO:0070857', 'GO:0019725', 'GO:0008203', 'GO:0008202', 'GO:0010468']	15
Contig015047	['GO:0050790', 'GO:0060048']	0
Contig007166	['GO:0006635', 'GO:0006629', 'GO:0006631']	3
Contig009647	['GO:0032456', 'GO:0035646', 'GO:0048812', 'GO:0035544', 'GO:0050775', 'GO:0031338', 'GO:0016192', 'GO:0031339', 'GO:0015031', 'GO:0045022', 'GO:0010976', 'GO:0050790', 'GO:0030182', 'GO:0046907']	7
Contig015190	['GO:0051591', 'GO:0018105', 'GO:0016310', 'GO:0006281', 'GO:0060041', 'GO:0070198', 'GO:0023051', 'GO:0009896', 'GO:0055085', 'GO:0030705', 'GO:0070201', 'GO:0007275', 'GO:0070207', 'GO:0006260', 'GO:0097421', 'GO:0015995', 'GO:0006412', 'GO:0035469', 'GO:0051260', 'GO:0000958', 'GO:0043488', 'GO:0016123', 'GO:0043633', 'GO:0061157', 'GO:0043170', 'GO:0010604', 'GO:0045893', 'GO:2000627', 'GO:00…	52
Contig012032	['GO:0016310', 'GO:0001819', 'GO:0006468', 'GO:0002253', 'GO:0001865', 'GO:0042110', 'GO:0030217', 'GO:0035556', 'GO:0018108', 'GO:0002376', 'GO:0006968', 'GO:0050852', 'GO:0001775', 'GO:0002250', '', 'GO:0046629', 'GO:0050853']	7
Contig000834	['GO:0010564', 'GO:0071479', 'GO:0000077', 'GO:0045786', 'GO:0006974', 'GO:0006281', 'GO:0000278', 'GO:0000076', 'GO:0035556', 'GO:0031573', 'GO:0090304', 'GO:0051726']	9
Contig005449	['GO:0006357', 'GO:0045892', 'GO:0050673', 'GO:0006954', 'GO:0009888', 'GO:0009653', 'GO:0001824', 'GO:0030855', 'GO:0030198', 'GO:0006351', 'GO:0045944', 'GO:0006355', 'GO:0006366', 'GO:0030154', 'GO:0060056']	11
Contig000840	['GO:0032400', 'GO:0034058', 'GO:0048856', 'GO:0035751', 'GO:0048284', 'GO:0048070', 'GO:0006886', 'GO:0008333', 'GO:0008104', 'GO:0016192', 'GO:0035542', 'GO:0033059', 'GO:0006623', 'GO:0043473', 'GO:0030220', 'GO:0051648', 'GO:0007033', 'GO:0032418', 'GO:0097352', 'GO:0006914', 'GO:0015031']	9
Contig003483	['GO:0019221', 'GO:0034097']	1
Contig013249	['GO:0042632', 'GO:0019222', 'GO:0010989', 'GO:0019222', 'GO:0016567', 'GO:0010977', 'GO:0031648', 'GO:0007399', 'GO:0006511', 'GO:0032803', 'GO:0045732', 'GO:0071404', 'GO:0006508']	6
Contig001698	['GO:0048731', 'GO:0007018']	2
Contig000823	['GO:0009968', 'GO:0000165', 'GO:0016567', 'GO:0007265', 'GO:0035556', 'GO:0050793', 'GO:0007264']	5
Contig015148	['GO:0022414', 'GO:0000280', 'GO:0010629', 'GO:0007143', 'GO:0051321', 'GO:0007281', 'GO:0048477', 'GO:0006302', '', 'GO:0010468', 'GO:0016441', 'GO:0007292', 'GO:0030154', 'GO:0035194']	8
Contig011322	['GO:0006357', 'GO:0010628', 'GO:0045893', 'GO:0045618', 'GO:0048856', 'GO:0033600', 'GO:0048863', 'GO:0045944', 'GO:0006355', 'GO:0006366', 'GO:0030154', 'GO:0008045', 'GO:0060444']	7
Contig012384	['GO:0032501', 'GO:0030030', 'GO:0048856', 'GO:0007224', 'GO:0043010', 'GO:0007275', 'GO:0001944', 'GO:0035177', 'GO:0060271', 'GO:0042733', 'GO:0008104', 'GO:0032502', 'GO:1904491', 'GO:1905515', 'GO:0032880', 'GO:0007166', 'GO:0060563', 'GO:0008340', 'GO:0001701']	7
Contig013161	['GO:0009615', 'GO:0030218', 'GO:0002566', 'GO:0006382', 'GO:1900369', 'GO:0061484', 'GO:0048856', 'GO:0016553', 'GO:0035455', 'GO:0045070', 'GO:0051607', 'GO:1903944', 'GO:0008152', 'GO:0035196', 'GO:0044387', 'GO:0070922', 'GO:0098586', 'GO:0006606', 'GO:0045087', 'GO:0060339', 'GO:0006396', 'GO:0097284', 'GO:0002376', 'GO:0006397', 'GO:0006611', 'GO:0002244', 'GO:0006915', 'GO:0001649', 'GO:00…	12
Contig013134	['GO:0006888', 'GO:0043123', 'GO:0016192', 'GO:0048208', 'GO:0065003']	5
Contig001266	['GO:0007507', 'GO:0060977', 'GO:1902747', 'GO:0043516', 'GO:0043549', 'GO:0009966', 'GO:0006469', 'GO:0070373', 'GO:0019222', 'GO:0001945', 'GO:0010719', 'GO:0001570', 'GO:0090311', 'GO:0045595', 'GO:0043408', 'GO:0048514', 'GO:0016525', 'GO:0030512', 'GO:0010801', 'GO:0090051', 'GO:0043409', 'GO:0001933', 'GO:0010717', 'GO:0030947', 'GO:0060979', 'GO:0043517', 'GO:0006974']	10
Contig007093	['GO:0006357', 'GO:0048568', 'GO:0001654', 'GO:0045880', 'GO:0006355', 'GO:0050896', 'GO:0007601']	6
Contig004778	['GO:0009749', 'GO:0007409', 'GO:0035821', 'GO:0007517', 'GO:0007155']	5
Contig015617	['GO:0022414', 'GO:0050688', 'GO:0002376', 'GO:0045879', 'GO:0016567', 'GO:0007283', 'GO:0030154', 'GO:0000079', 'GO:0006511', 'GO:0032020', 'GO:0045087', 'GO:0051607', 'GO:0006508']	9
Contig004529	['GO:0006493', 'GO:0097502', 'GO:0035269', 'GO:0009401', 'GO:0007275', 'GO:0048856', 'GO:0015671', 'GO:1904100', 'GO:0006486']	5
Contig004005	['GO:0050731', 'GO:0016311', 'GO:0006470', 'GO:0050852', 'GO:0006469']	2
Contig015483	['GO:0050896', 'GO:0097028', 'GO:0000278', 'GO:0007249', 'GO:0060337', 'GO:0051607', 'GO:0042110', 'GO:0044565']	4
Contig008895	['GO:0051091', 'GO:2000144', 'GO:0006468', 'GO:0006351', 'GO:0045944', 'GO:0006413', 'GO:0065003', '', 'GO:0006355', '', 'GO:0006367', '', 'GO:0010468', 'GO:0060261', 'GO:0006282', 'GO:0045893', 'GO:0051123', '', 'GO:0042789', 'GO:0043484', 'GO:0006357', 'GO:0006366', 'GO:0006352', 'GO:0006508']	13
Contig012430	['GO:0015711', 'GO:0008643', 'GO:0006814', 'GO:0006811', 'GO:0035725', 'GO:0015798', 'GO:0015824', 'GO:0006915', 'GO:0032409', 'GO:0015791', 'GO:1904659', 'GO:0015850', 'GO:0055085']	6
Contig003917	['', 'GO:0002224', 'GO:0016236', 'GO:0016310', 'GO:0051179', 'GO:1902902', 'GO:0014070', 'GO:0006862', 'GO:1901698', 'GO:0034162', 'GO:0036335', 'GO:0071407', 'GO:0060576', 'GO:0061909', 'GO:0008333', 'GO:1990786', 'GO:0002221', 'GO:0009987', 'GO:0032456', 'GO:0097352', 'GO:0006914']	7
Contig006205	['GO:0051899', 'GO:0006940', 'GO:0060079', 'GO:0060078', 'GO:0046928', 'GO:0007271', 'GO:0007274', 'GO:0006811', 'GO:0007268', 'GO:0051971', 'GO:0001508', 'GO:0007626', 'GO:0035094', 'GO:0019228', 'GO:0034220', 'GO:0003014', 'GO:0050877', 'GO:0035095', 'GO:0042391', 'GO:0006939', 'GO:0060084']	8
Contig011611	['GO:0006506', 'GO:0097502', 'GO:0006661', 'GO:0010467', 'GO:0006497', 'GO:0010468', 'GO:0006505']	3
Contig002876	['GO:0006796', 'GO:0016311']	2
Contig013287	['GO:2000045', 'GO:0045597', 'GO:0045663', 'GO:0048856', 'GO:0006351', 'GO:0006337', 'GO:2000781', 'GO:1902459', 'GO:0007275', 'GO:0061053', 'GO:2000819', 'GO:0007399', 'GO:0006355', 'GO:0016043', 'GO:0006338', 'GO:0034728', 'GO:0010628', 'GO:0010468', 'GO:0002244', 'GO:0045893', 'GO:0030071', 'GO:0045596', 'GO:0045582', 'GO:0071398', 'GO:0021510', 'GO:0070316', 'GO:0045815', 'GO:0008284', 'GO:00…	11
Contig007133	['GO:0036158', 'GO:0006417']	1
Contig013225	['GO:0042073', 'GO:0016310', 'GO:0045893', 'GO:0006468', 'GO:0046777', 'GO:1902856', 'GO:0045494', 'GO:1905515', 'GO:0035556', 'GO:0007283', 'GO:0030154', 'GO:0060271']	9
Contig014905	['GO:0006414', 'GO:0006790', 'GO:0050829', 'GO:0048137', 'GO:0007291', 'GO:0045089', 'GO:0006417', 'GO:0010467', 'GO:0010468', 'GO:0006412', 'GO:0016441']	5
Contig001650	['', 'GO:0006383', 'GO:0042791', 'GO:0006384', 'GO:0006351', 'GO:0042797', 'GO:0050790', 'GO:0006352']	3
Contig012835	['GO:0016477', 'GO:0046578', 'GO:0090630', 'GO:0050790']	2
Contig000208	['GO:0006836', 'GO:0099509', 'GO:0007268', 'GO:2000300', 'GO:0055085']	3
Contig006865	['GO:0006414', 'GO:1904714', '', 'GO:0010468', 'GO:0071466', 'GO:0071364', 'GO:1990090', 'GO:0010467', 'GO:0043549', 'GO:1903427', '', 'GO:0044829', 'GO:0071363', 'GO:0010976', 'GO:0006412', '']	2
Contig011336	['GO:0009134', 'GO:0007186', 'GO:0046688', 'GO:0045471', 'GO:0009181', 'GO:0071405', 'GO:0030168', 'GO:0008152', 'GO:0071354']	3
Contig010678	['GO:0010467', 'GO:0051604', 'GO:0072659', 'GO:0008104']	3
Contig002365	['GO:0006903', 'GO:0017157', 'GO:0099003', 'GO:0002553', 'GO:0016082', 'GO:0016192', 'GO:0098967', 'GO:0006892', 'GO:0006906', 'GO:0031629', 'GO:0015031', 'GO:0051649', 'GO:0061025', 'GO:0065003', 'GO:0006887', 'GO:0007268']	6
Contig013617	['GO:0042127', 'GO:0043405', 'GO:0016310', 'GO:0019933', 'GO:0006468', 'GO:1902533', 'GO:0007265', 'GO:0035556', 'GO:0043410']	4
Contig001336	[]	0
Contig014182	['', 'GO:0015807', 'GO:0016310', 'GO:0009103', 'GO:0006094', 'GO:0005975', 'GO:0006351', 'GO:0045944', 'GO:0006865', 'GO:1903692', 'GO:0000462', 'GO:0055085', 'GO:0071705', 'GO:0046835', 'GO:0015849', 'GO:0006007', 'GO:0042883', 'GO:0071453', 'GO:0006412', 'GO:0031114', 'GO:0008152', 'GO:0009244', 'GO:0000463', 'GO:1902475', 'GO:0000101', 'GO:0007026', 'GO:0019752', 'GO:0006096', 'GO:0015821', 'G…	16
Contig007436	['GO:1901016', 'GO:0043161', 'GO:0045944', 'GO:0032410', 'GO:0034765', 'GO:0045892', 'GO:0051224', 'GO:0000209', 'GO:0016567', 'GO:0006366', 'GO:0036211', 'GO:0046718', 'GO:0060021', 'GO:0010629', 'GO:0032880', 'GO:0070534', 'GO:0000122', 'GO:0051865', 'GO:0006858', 'GO:0043433', 'GO:0006511', 'GO:0042391', 'GO:0006508']	11
Contig007404	['GO:0045104', 'GO:0061844', 'GO:0009888', 'GO:0050830', 'GO:0043588', 'GO:0006915', 'GO:0002009', 'GO:0042060', 'GO:0031424', 'GO:0045109', 'GO:0016055']	5
Contig007863	['GO:0000724', 'GO:0017157', 'GO:0045921', 'GO:0050708', 'GO:0032259', 'GO:0016310', 'GO:0016579', 'GO:2000300', 'GO:0010807', 'GO:0009236', 'GO:0050790', 'GO:0032880', 'GO:0006887', 'GO:0007018', 'GO:0015031']	6
Contig006054	['GO:0006259', '']	1
Contig004610	['GO:0048608', 'GO:0070173', 'GO:0001932', 'GO:0051216', 'GO:0007275', 'GO:0008152', 'GO:0040034', 'GO:0033227', 'GO:0060576', 'GO:0043170', 'GO:0048730', 'GO:0002119', 'GO:0031069', 'GO:0030856', 'GO:0051726', 'GO:0022414', 'GO:0044238', 'GO:0070301', 'GO:1904888', 'GO:0055013', 'GO:0035264', 'GO:0042594', 'GO:0007279', 'GO:0002230', 'GO:0000212', 'GO:0048812', 'GO:0050830', 'GO:0009653', 'GO:00…	37
Contig004240	['GO:0022604', 'GO:0030512', 'GO:0035019', 'GO:0045445', 'GO:0060070', 'GO:0045893', 'GO:0010718', 'GO:0045944', 'GO:0006366', 'GO:0035914']	7
Contig012332	['GO:0009267', 'GO:0000045', 'GO:0000422', 'GO:0044804', 'GO:0098792', 'GO:0034497', 'GO:0006497', 'GO:0061739', 'GO:0006914', 'GO:0007005']	5
Contig014664	['GO:0030490', 'GO:0007015', 'GO:0007186', 'GO:0016310', 'GO:0042274', 'GO:0006468', 'GO:0043549', 'GO:0051017', 'GO:0007605', 'GO:0007599', 'GO:0032147', 'GO:0007596', 'GO:0006139', 'GO:0000165', 'GO:1902533', 'GO:0035556', 'GO:0019722', 'GO:0007155', 'GO:0045859', 'GO:0006897', 'GO:1902262', 'GO:0018108', 'GO:0051493', 'GO:0048513', 'GO:0034614', 'GO:0031589', 'GO:0007049', 'GO:0006915', 'GO:00…	20
Contig001940	[]	0
Contig000140	['GO:0031293', 'GO:0033619', 'GO:0050776', 'GO:0006509', 'GO:0006508']	2
Contig015479	['GO:0031954', 'GO:0043406', 'GO:0016310', 'GO:1902749', 'GO:0120197', 'GO:0006468', 'GO:0043549', 'GO:0070372', 'GO:0001934', 'GO:0043410', 'GO:0051726']	4
Contig001278	['GO:0048812', 'GO:0007420', 'GO:0007156', 'GO:0016339', 'GO:0007399', 'GO:0007155']	4
Contig009134	['GO:0046890', 'GO:0051353', 'GO:0045333', 'GO:0032024', '', 'GO:1902553', 'GO:0070373', 'GO:0019222', 'GO:2000757', 'GO:0006355', 'GO:0019222', 'GO:1901671', 'GO:2000378', 'GO:0006476', 'GO:2000304', '', 'GO:0034983', 'GO:0035601', 'GO:0009060', 'GO:1903109', 'GO:0009892', 'GO:0010468']	5
Contig015476	['GO:0006629', 'GO:0006633', 'GO:0051790', 'GO:0051792', 'GO:0006637', 'GO:0009987', 'GO:0032787', 'GO:0008610', 'GO:0008152', 'GO:0006631']	7
Contig012529	['GO:0006357', 'GO:0002062', 'GO:0051216', 'GO:0006888', 'GO:0003330', 'GO:0010628', 'GO:0060628', 'GO:0006986', 'GO:0034976', 'GO:0045893', 'GO:0009611', 'GO:0030968', 'GO:0045944', 'GO:0006355', 'GO:0010976']	11
Contig010675	['GO:0007076', 'GO:1905820', 'GO:0051301', 'GO:0051309', 'GO:0007049', 'GO:0000278', 'GO:0045132', 'GO:0007143', 'GO:0010032', 'GO:0030261', 'GO:1905821', 'GO:0000070', 'GO:0051984']	5
Contig010296	['GO:0010467', 'GO:0019221', 'GO:0043547', 'GO:0002181']	2
Contig004719	['GO:0006629', 'GO:0007059', 'GO:0000278', 'GO:0007420', 'GO:0048193', 'GO:0005975', 'GO:0016202', 'GO:0006979', 'GO:0051649', 'GO:0051654', 'GO:0007517', 'GO:0051382', 'GO:0007094', '', 'GO:0043001', 'GO:0009395', 'GO:0071897', 'GO:0010044', 'GO:0045892', 'GO:0072384', 'GO:0009410', 'GO:0007127', 'GO:0034976', 'GO:0000226', 'GO:0045087', 'GO:0060271', 'GO:0016042', 'GO:0006643', 'GO:0008104', 'G…	24
Contig005368	['GO:0016601', 'GO:0031175', 'GO:2000601', 'GO:1990138', 'GO:0050890', 'GO:0050808', 'GO:1903422', 'GO:0099563', 'GO:1900029', 'GO:1905274', 'GO:0008360', 'GO:0031641', 'GO:1900006', 'GO:0030032', 'GO:0051388', 'GO:0051602', 'GO:0007399', 'GO:0035556', 'GO:0007264', 'GO:0097484', 'GO:0030031', 'GO:0031529', 'GO:0051493', 'GO:0006417', 'GO:0010592', 'GO:0032869', 'GO:0099578', 'GO:0007265', 'GO:00…	14
Contig012920	['GO:0007188', 'GO:0007186', 'GO:0036446', 'GO:0007567', 'GO:0007190', 'GO:0030198', 'GO:0007189', 'GO:0009755', 'GO:0060427', 'GO:0060658', 'GO:0009725']	5
Contig014239	['GO:0006357', '', 'GO:0006511', 'GO:0000122', 'GO:0010468', 'GO:0007283', 'GO:0016579', 'GO:0045944', 'GO:0006355', 'GO:0010845', 'GO:0030154', 'GO:0006508']	9
Contig009960	['GO:0006511', 'GO:0016477', 'GO:0006281', 'GO:0003407', 'GO:0045494', 'GO:0016579', 'GO:0006508']	6
Contig005446	['GO:0016311', 'GO:0006470', 'GO:0043410', 'GO:0035335']	2
Contig001558	['GO:0031023', 'GO:0007059', 'GO:0007420', 'GO:0000132', 'GO:0045664', 'GO:0022008', 'GO:0007098', 'GO:0045786', 'GO:0000226', 'GO:0051493', 'GO:0046600', 'GO:0045665', 'GO:0045893', 'GO:0007099', 'GO:0090266', 'GO:0031116', 'GO:0051726', 'GO:0001578', 'GO:0045736']	11
Contig006603	['GO:0006357', 'GO:0048513', 'GO:0001501', 'GO:0007275', 'GO:0048706', 'GO:0009653', 'GO:0001708', 'GO:0007420', 'GO:0009790', 'GO:0048704', 'GO:0045446', 'GO:0003002', 'GO:0045944', 'GO:0006355', 'GO:0009952', 'GO:0030154']	9
Contig002444	['GO:0046034', 'GO:0046688', 'GO:1902600', 'GO:0065003', 'GO:0033615', 'GO:0009060', 'GO:0006754', 'GO:0015986', 'GO:0045333', 'GO:0006811', 'GO:0007005', 'GO:0042776']	8
Contig007709	['GO:0006357', 'GO:0006970']	1
Contig007922	['GO:0007017']	1
Contig003371	['GO:0016310', 'GO:0006468', 'GO:0032212', 'GO:1904355', 'GO:0006974', 'GO:1905188', 'GO:0007029', 'GO:0000165', 'GO:0035556', 'GO:0010506', 'GO:0015850', 'GO:1905832', 'GO:1904491', 'GO:0061512', 'GO:0030336', 'GO:1902017', 'GO:0008284', 'GO:0046777', '', 'GO:0003400', 'GO:0090494', 'GO:0006812']	9
Contig013812	['', 'GO:0010628', 'GO:0006357', 'GO:0051726']	3
Contig012341	['GO:0008104', 'GO:0010628', '', 'GO:0006606', 'GO:0006607', 'GO:0006913', 'GO:0010629', 'GO:0001824', 'GO:0015031']	5
Contig006466	[]	0
Contig003542	['GO:0006357', 'GO:0000122', 'GO:0045944', 'GO:0010468', 'GO:0061484', 'GO:0071425', 'GO:0030097', 'GO:0060216', 'GO:0006355', 'GO:0034605']	7
Contig013602	['GO:0090043', 'GO:0000278', 'GO:0001932', '', 'GO:0006351', '', '', 'GO:0045995', '', 'GO:0080090', 'GO:0006355', 'GO:0019222', 'GO:0031647', '', 'GO:2000026', 'GO:0006338', 'GO:0060255', '', '', 'GO:0043170', 'GO:0045893', 'GO:0051726', 'GO:0044238', 'GO:0051302', 'GO:0008152', 'GO:0006357', 'GO:0006352']	11
Contig005533	['GO:0051279', 'GO:0035855', 'GO:0032715', 'GO:0043407', 'GO:2000045', 'GO:0007186', 'GO:0000278', 'GO:0042267', 'GO:0033007', 'GO:0070372', 'GO:0019221', 'GO:0002924', 'GO:0032720', 'GO:0070527', 'GO:0051897', 'GO:0042130', 'GO:1905867', 'GO:0050853', 'GO:0050732', 'GO:0000165', 'GO:0035556', 'GO:0006470', 'GO:0045087', 'GO:0018108', 'GO:0035335', 'GO:0002244', 'GO:0045577', 'GO:0042981', 'GO:00…	12
Contig000969	[]	0
Contig001477	[]	0
Contig000850	['GO:0051259', 'GO:0051291', 'GO:0045444']	1
Contig006257	[]	0
Contig007870	['GO:0042554', 'GO:0045730', 'GO:0050790', 'GO:0072593', 'GO:0006909']	3
Contig002148	['GO:0061371', 'GO:0008104', 'GO:0003140', 'GO:0051301', 'GO:0007049', 'GO:0071907', 'GO:0061640', 'GO:0007283', 'GO:0048856', 'GO:0007368', 'GO:0000281', 'GO:0071910', 'GO:0035469', 'GO:0030154', 'GO:0060271']	7
Contig002874	['GO:0005975', 'GO:0019319']	1
Contig005442	['GO:0007010', 'GO:0006996', 'GO:0007017', 'GO:0000278', 'GO:0007097', 'GO:0000226', 'GO:0099111']	5
Contig013307	['GO:0006397', 'GO:0008380', 'GO:0000398', 'GO:0010467', 'GO:0006412']	4
Contig008046	['GO:0006357', 'GO:0048821', 'GO:0000122', 'GO:0009887', 'GO:0045595', 'GO:0048856', 'GO:0045596', 'GO:0001709', 'GO:0006355', 'GO:0006366', 'GO:0030154']	7
Contig006652	['GO:0048538', 'GO:0009880', 'GO:0036342', 'GO:0001708', 'GO:0060041', 'GO:0009653', 'GO:0007422', 'GO:0030902', 'GO:0048666', 'GO:0043066', 'GO:0051781', 'GO:0008283', 'GO:0014032', 'GO:0051216', 'GO:0050769', 'GO:0044344', 'GO:0048920', 'GO:0071696', 'GO:0001759', 'GO:0009953', 'GO:0050793', 'GO:0021572', 'GO:0009952', 'GO:0055026', 'GO:0016055', 'GO:0008543', 'GO:0030335', 'GO:0042127', 'GO:00…	20
Contig000380	['GO:1901299', 'GO:2000491', 'GO:0051091', 'GO:0016310', 'GO:1904385', 'GO:0070374', 'GO:0032101', 'GO:0030500', 'GO:0006468', 'GO:0043549', 'GO:0038063', 'GO:0043066', '', 'GO:0045667', 'GO:1904899', 'GO:1903055', 'GO:0030199', 'GO:0007275', 'GO:0045669', 'GO:0090303', 'GO:0048146', 'GO:0035988', 'GO:0098868', 'GO:1904754', 'GO:0010763', 'GO:0006355', 'GO:0045859', 'GO:0007155', 'GO:0018108', 'G…	17
Contig000232	['GO:0065003', 'GO:0033617', 'GO:0008535', 'GO:0007005']	3
Contig000687	['GO:0000956', 'GO:0010607', 'GO:0061157', 'GO:0000290', 'GO:0033962', 'GO:0017148', 'GO:0010629', 'GO:0070925']	5
Contig008251	['GO:0045892', 'GO:0000122', 'GO:0045944', 'GO:0006968', 'GO:0007276', 'GO:0006355', 'GO:0030097', 'GO:0010629', 'GO:0006357', 'GO:0065003', 'GO:0021762']	7
Contig012245	['GO:0044237', 'GO:0015976', 'GO:0033108', 'GO:0006105', 'GO:0050881', 'GO:0006094', 'GO:0006111', 'GO:0044281', 'GO:0055093', 'GO:0006979', 'GO:0034553', 'GO:0065003', 'GO:0019752', 'GO:0007005']	6
Contig002843	['GO:0055010', 'GO:0048608', 'GO:0016310', 'GO:0060601', 'GO:0060441', 'GO:0060445', 'GO:0030855', 'GO:0070374', 'GO:0042327', 'GO:0051781', 'GO:0060484', 'GO:0072089', 'GO:0044344', 'GO:1904677', 'GO:0060523', 'GO:0050673', 'GO:0060449', 'GO:0070371', 'GO:0003416', 'GO:0010463', 'GO:0048730', 'GO:0031069', 'GO:0090263', 'GO:0042060', 'GO:0043410', 'GO:0030177', 'GO:0048705', 'GO:0042472', 'GO:00…	24
Contig001613	['GO:0098869', 'GO:0008285', 'GO:0031620', 'GO:0006629', 'GO:0006633', 'GO:0019233', 'GO:0006693', 'GO:0050727', 'GO:0042074', 'GO:0032308', 'GO:0071347', 'GO:0001516', 'GO:0008283', 'GO:0006631']	8
Contig008468	['GO:0007186', 'GO:0060280', 'GO:0001546', 'GO:0032508', 'GO:0007218', 'GO:0001547']	3
Contig011653	['GO:0051216', 'GO:0007565', 'GO:0061975', 'GO:0007605', 'GO:0060348']	2
Contig005298	['GO:0032730', 'GO:0043123', 'GO:0051882', 'GO:0071260', 'GO:0001774', 'GO:0001819', 'GO:0007231', 'GO:0050729', 'GO:0060907', 'GO:0014070', 'GO:0001666', 'GO:0051607', 'GO:0009410', 'GO:0090200', 'GO:0140448', 'GO:0010506', 'GO:0046010', 'GO:0097190', 'GO:0007613', 'GO:0006919', 'GO:0046456', 'GO:0033198', 'GO:0043065', 'GO:0071222', 'GO:0050727', '', 'GO:0042981', 'GO:0002221', 'GO:0071346', 'G…	19
Contig002833	['GO:0007188', 'GO:0002029', 'GO:0008284', 'GO:0106072', 'GO:0045444', 'GO:0016310', 'GO:0006915', 'GO:0016055', 'GO:0046777', 'GO:0006468', 'GO:0008277', 'GO:0009966', 'GO:0043066', 'GO:0007217', 'GO:0051726']	7
Contig005592	['GO:0010468']	1
Contig006912	['GO:0018105', 'GO:0071479', 'GO:0016310', 'GO:0071493', 'GO:1904291', 'GO:0006468', 'GO:0045787', 'GO:0140469', 'GO:0009966', 'GO:0030326', 'GO:0048598', 'GO:0008219', 'GO:0032147', 'GO:0006974', 'GO:0038066', 'GO:0051403', 'GO:0000165', 'GO:0071480', 'GO:0035556', 'GO:0043068', 'GO:0042733', 'GO:0010564', 'GO:0000077', 'GO:0043065', 'GO:0007049', 'GO:0060173', 'GO:0007346', 'GO:0042981', 'GO:00…	14
Contig013092	['GO:0015711', 'GO:0016042', 'GO:0006629', 'GO:0044255', 'GO:0015909', 'GO:0015908', 'GO:0043433', 'GO:0006644', 'GO:0050482']	8
Contig011877	['GO:0006629', 'GO:0002098', 'GO:0031175', 'GO:0070374', 'GO:0007420', 'GO:0043161', 'GO:0045944', 'GO:0065003', 'GO:0043010', 'GO:0006974', 'GO:1901698', 'GO:0006400', 'GO:0034976', 'GO:0080090', 'GO:0007189', 'GO:0006355', 'GO:0019222', 'GO:0036170', 'GO:0008033', 'GO:0036503', '', 'GO:0009267', 'GO:0008152', '', 'GO:0032259', 'GO:0046373', 'GO:0032880', 'GO:0043547', 'GO:0043248', 'GO:0030447'…	26
Contig012498	['GO:0006836', '', 'GO:0071705', 'GO:0003333', 'GO:0031460', 'GO:0035725', 'GO:0015812', 'GO:0015718', 'GO:0055085']	5
Contig009705	['GO:0003429', 'GO:0002062', 'GO:0050878', 'GO:0030500', 'GO:0030198', 'GO:0065003', 'GO:0016043', 'GO:0006508']	4
Contig013666	['GO:0110020', 'GO:0071479', 'GO:0032970', 'GO:0007480', 'GO:0035277', 'GO:0007298', 'GO:0051017', 'GO:0007517', 'GO:0007160', 'GO:0050896', 'GO:0008045', 'GO:0008360', 'GO:0060537', 'GO:0007395', 'GO:0022409', 'GO:0042249', 'GO:0030010', 'GO:0043297', 'GO:0051496', 'GO:0035556', 'GO:1901739', 'GO:0043149', 'GO:0048513', 'GO:0043524', 'GO:0043065', 'GO:0009968', 'GO:0007377', 'GO:0000915', 'GO:00…	60
Contig003023	['GO:0006869', 'GO:0006665']	2
Contig012902	['GO:2001237', 'GO:2000261', 'GO:0051258', 'GO:0051592', 'GO:0070374', 'GO:2000352', 'GO:0014911', 'GO:0043066', 'GO:0065003', 'GO:0030195', 'GO:0007160', 'GO:0007599', 'GO:0070527', 'GO:0072378', 'GO:0007596', 'GO:0045921', 'GO:0072377', 'GO:0007155', 'GO:0043152', 'GO:0045087', 'GO:1900026', 'GO:0002376', 'GO:1902042', 'GO:0090277', 'GO:0042060', 'GO:0043410', 'GO:0001775', 'GO:0002250', 'GO:00…	17
Contig012987	[]	0
Contig002163	['GO:2000042', 'GO:2000779', 'GO:0006282']	2
Contig012917	['GO:0034220', 'GO:0007215', 'GO:0035249', 'GO:0050804', 'GO:0006811', 'GO:0035235', 'GO:0007268']	5
Contig014698	['GO:0007186', 'GO:0034644', 'GO:0016310', 'GO:1901255', 'GO:0006281', 'GO:0060041', 'GO:0005975', 'GO:0006289', 'GO:0006413', 'GO:0006289', 'GO:0019538', 'GO:0050896', 'GO:0051607', 'GO:0008152', 'GO:0006289', 'GO:0006974', 'GO:1904357', 'GO:0071482', 'GO:0042462', 'GO:0032218', 'GO:1905765', 'GO:0036297', 'GO:0043170', 'GO:0090304', 'GO:0010506', 'GO:0006897', 'GO:0071407', 'GO:0071354', 'GO:00…	30
Contig001404	['GO:0016567']	1
Contig011665	['GO:0046426', 'GO:0007259', 'GO:0043549', 'GO:0060749', 'GO:0009966', 'GO:0060336', 'GO:0043066', 'GO:0019222', 'GO:0006661', 'GO:0016567', 'GO:0035556', 'GO:0040015', 'GO:0032355', 'GO:0060339', 'GO:0009968', 'GO:0007595', 'GO:0001558', 'GO:0040014', 'GO:0046854', 'GO:0046425', 'GO:0045666', 'GO:0060396', '', 'GO:0032870', 'GO:0040008']	10
Contig004911	['GO:0042073']	1
Contig015952	['GO:0072344', 'GO:0043409', 'GO:0071466', 'GO:1990116', 'GO:0016567', 'GO:0006511', 'GO:0031647', 'GO:0006508']	5
Contig005879	['GO:0006656', 'GO:0044255', 'GO:0006629', 'GO:0008654', 'GO:0006646', 'GO:0008610']	5
Contig009036	['GO:0006355', 'GO:0006357', 'GO:0001654', 'GO:0010468']	4
Contig009849	['GO:0007155', 'GO:0007399']	2
Contig005107	['GO:0007186', 'GO:0007608', 'GO:0050911', 'GO:0050896']	4
Contig000682	['GO:0030520', 'GO:0072344', 'GO:0010468', 'GO:0007409', 'GO:0001966', '', 'GO:0009987', 'GO:0045893', 'GO:0007528', 'GO:1990116', 'GO:0032790', 'GO:0045661', 'GO:0006355', 'GO:0061055']	8
Contig009605	['GO:0006364', 'GO:0002376', 'GO:0034101', 'GO:0002181', 'GO:0042274', 'GO:0010467', 'GO:0140242', 'GO:0097421', 'GO:0006413', 'GO:0006412', 'GO:0140236']	5
Contig014096	['GO:0090304', '']	1
Contig007798	['GO:0031122']	1
Contig002174	['GO:0010468', 'GO:0032675']	1
Contig005455	['GO:0045892', 'GO:0000122', 'GO:0030855', 'GO:0010977', 'GO:0048856', 'GO:0006351', 'GO:0060575', 'GO:0010976', 'GO:0045746', 'GO:0030154']	7
Contig014163	['GO:0022414', 'GO:0007283', 'GO:0030154', 'GO:0007286']	4
Contig012047	['GO:0050806', 'GO:0007186', 'GO:0099505', 'GO:0007215', 'GO:0014070', 'GO:1990416', 'GO:0071230', 'GO:0035235', 'GO:0060078', 'GO:0045838', 'GO:0009410', 'GO:0001661', 'GO:0099566', 'GO:0021987', 'GO:0031623', 'GO:0071363', 'GO:0032355', 'GO:0009636', 'GO:0006811', 'GO:0071407', 'GO:0007268', 'GO:0007613', 'GO:0043434', 'GO:0060292', 'GO:0048167', 'GO:0060992', 'GO:0001919', 'GO:0010226', 'GO:00…	11
Contig000561	[]	0
Contig013635	['GO:0006357', 'GO:0010468', 'GO:0060173', 'GO:0030488', 'GO:0032259', 'GO:0060261', 'GO:0048147', 'GO:0016567', 'GO:0032968', 'GO:0051123', 'GO:0006351', 'GO:0006355', 'GO:0008033']	10
Contig005051	['GO:0007015', 'GO:0043583', 'GO:0032400', 'GO:0008057', 'GO:0035725', 'GO:0016477', 'GO:0002089', 'GO:0043010', 'GO:0043482', 'GO:0030036', 'GO:0007420', 'GO:0048593', 'GO:0032438', 'GO:0051649', 'GO:0032401', 'GO:0045176']	6
Contig002209	['GO:0045892', 'GO:0042552', 'GO:0010468', 'GO:0014037', 'GO:0006351', 'GO:0006355', 'GO:0045682', 'GO:0001958']	5
Contig009818	['GO:0070129', 'GO:0002082', 'GO:0006545', 'GO:0006544', 'GO:0019264', 'GO:0034340', 'GO:0009113', 'GO:0046653', 'GO:0006144', 'GO:0045087', 'GO:1903715', 'GO:0006760', 'GO:0034097', 'GO:0006565', 'GO:0032259', 'GO:0006417', 'GO:0006563', 'GO:0017148', 'GO:0016579', 'GO:0010629', 'GO:0006564', 'GO:0008284', 'GO:0070536', 'GO:0006508', 'GO:0046655', 'GO:0006730', 'GO:0010468', 'GO:0051289', 'GO:00…	16
Contig006538	['GO:0007015', 'GO:0061502', 'GO:0061966', 'GO:0030050', 'GO:0051641', 'GO:0099518', 'GO:0030036', 'GO:0016192', 'GO:0015031', 'GO:0035469', 'GO:0071910', 'GO:0048731', 'GO:0003146', 'GO:0006897', 'GO:0060287', 'GO:0046907']	8
Contig014810	['GO:0018105', 'GO:0090090', 'GO:0001827', 'GO:0016310', 'GO:0007059', 'GO:0000278', 'GO:0030855', 'GO:0030216', 'GO:0006468', 'GO:0043549', 'GO:0009966', 'GO:0060644', 'GO:0017015', 'GO:0009725', 'GO:0033138', 'GO:0006469', 'GO:0000082', 'GO:0045786', 'GO:0007275', 'GO:0000086', 'GO:0035556', 'GO:0051493', 'GO:0008104', 'GO:0035329', 'GO:0043065', 'GO:0007049', 'GO:0030509', 'GO:0046620', 'GO:00…	17
Contig005526	['GO:0032350', 'GO:0007186', 'GO:0090207', 'GO:0045595', 'GO:0006884', 'GO:0010906', 'GO:1903725', 'GO:0010468', 'GO:0045598', 'GO:0008217', 'GO:0090181']	4
Contig014848	['', 'GO:0006629', 'GO:0046856', 'GO:0006661', 'GO:0048488', 'GO:0036092', 'GO:0007420', 'GO:0005975', 'GO:0019637', 'GO:1901615']	5
Contig004656	['GO:0051301', 'GO:0006974', 'GO:0007049', 'GO:0016310', 'GO:0006281', 'GO:0042254', 'GO:0042273', 'GO:0006260']	7
Contig010232	['GO:0018400', 'GO:0008285', 'GO:0042127', 'GO:0032963', 'GO:0019511']	3
Contig007959	['GO:0033151', 'GO:0071479', 'GO:0000727', 'GO:0016310', 'GO:0031297', 'GO:0006281', 'GO:0120290', 'GO:0007420', 'GO:0045944', 'GO:0022008', 'GO:0097680', 'GO:0045621', 'GO:0008152', 'GO:0045892', 'GO:0006974', 'GO:0019222', 'GO:0097695', 'GO:0050769', 'GO:0071480', 'GO:0031509', 'GO:0002218', 'GO:0097552', 'GO:0045087', 'GO:0000724', 'GO:0002376', 'GO:0048660', 'GO:0060255', 'GO:0008152', 'GO:00…	29
Contig013370	['GO:0048513', 'GO:0007507', 'GO:0007015', 'GO:0007186', 'GO:0009968', 'GO:0030036', 'GO:0061061']	6
Contig007715	['GO:1900182', 'GO:0003222', 'GO:0090090', 'GO:0003015', 'GO:0060828', 'GO:0043549', 'GO:0060390', 'GO:0072148', 'GO:0009966', 'GO:0045944', 'GO:0045667', 'GO:0006469', 'GO:0045892', 'GO:0048566', 'GO:0045669', 'GO:0001944', 'GO:0046844', 'GO:0048762', 'GO:0034672', 'GO:0016567', 'GO:0022607', 'GO:0035556', 'GO:0006355', 'GO:0072307', 'GO:0060271', 'GO:0032835', 'GO:0048387', 'GO:0001570', 'GO:00…	22
Contig003687	['GO:0010975', 'GO:0008152', '', 'GO:0007399', 'GO:0008152', 'GO:0050773', 'GO:0008152']	2
Contig014944	['GO:0002376', 'GO:0030217', 'GO:0043383', 'GO:0002253', 'GO:0043368', 'GO:0050852', 'GO:0001775', 'GO:0002250']	4
Contig010610	['GO:0007186', 'GO:0048812', 'GO:0019933', 'GO:0007420', 'GO:0032793', 'GO:0009190', 'GO:1904322', 'GO:0009410', 'GO:0042752', 'GO:0035556', 'GO:0007189', 'GO:0099171', 'GO:0006355', 'GO:0010038', 'GO:0150076', 'GO:0010468', 'GO:0007623', 'GO:0007190', 'GO:0010226', 'GO:0050804', 'GO:0048511', 'GO:1900273', 'GO:0006171', 'GO:0007409', 'GO:2000300', 'GO:0050877', 'GO:0007616', 'GO:0006954', 'GO:00…	16
Contig008539	['GO:0043086', 'GO:0001558', 'GO:0007283', 'GO:0043087', 'GO:0006470', 'GO:0050790', 'GO:0007286']	3
Contig007471	['GO:0022414', 'GO:0034614', 'GO:0006183', 'GO:0007049', 'GO:0030317', '', 'GO:0006241', 'GO:0030154', 'GO:0007283', 'GO:0006228', 'GO:0008152', 'GO:0060271']	7
Contig007094	['GO:0000278', 'GO:0043549', 'GO:0000320', 'GO:0045786', 'GO:0016567', 'GO:0010826', 'GO:0045859', 'GO:0051493', 'GO:0010564', 'GO:0007049', 'GO:0000079', '', 'GO:0051726', 'GO:0051301', 'GO:0001890', 'GO:0006511', 'GO:0044772', 'GO:0031146', 'GO:0006508']	9
Contig010410	['GO:0048513', 'GO:0050878', 'GO:0019222', 'GO:0043065', 'GO:0016310', 'GO:0045669', 'GO:0045778', 'GO:0045667', 'GO:0030501', 'GO:0033689', 'GO:0010468', 'GO:0019222', 'GO:0007399', 'GO:0030154', 'GO:0042177', 'GO:0006508']	8
Contig009516	['', '', 'GO:0006629', 'GO:0007186', 'GO:0009435', 'GO:0009306', 'GO:0015836', 'GO:0030855', 'GO:0006664', 'GO:0070841', 'GO:0009252', 'GO:0001865', 'GO:0006869', 'GO:0019216', 'GO:0007605', 'GO:0008360', 'GO:0042552', 'GO:0048589', 'GO:0007275', 'GO:0071555', 'GO:0050885', 'GO:0006672', 'GO:0019363', 'GO:1903575', 'GO:1905572', 'GO:0006665', 'GO:0006886', 'GO:0090659', 'GO:0044255', 'GO:0006643'…	23
Contig002376	['GO:0006357', 'GO:0045892', '']	1
Contig002736	['GO:0045124', 'GO:0050748', 'GO:0032369', 'GO:0007160', 'GO:0042110', 'GO:0033627', 'GO:0097192', 'GO:0048041', 'GO:1905598', 'GO:0098609', 'GO:0034113', 'GO:0070371', 'GO:0001570', 'GO:0000902', 'GO:0071604', 'GO:0038027', 'GO:0006166', 'GO:0030154', 'GO:0043103', 'GO:0009888', 'GO:0070121', 'GO:0060982', 'GO:0051209', 'GO:0034446', '', 'GO:0051057', 'GO:0035909', 'GO:0045785', 'GO:2000536', 'G…	31
Contig000394	['GO:0072015', 'GO:0001946', 'GO:0030513', 'GO:0045672', 'GO:0070374', 'GO:0060674', 'GO:0048856', 'GO:0042742', 'GO:1990705', 'GO:0072576', 'GO:0030326', 'GO:0072574', 'GO:0043066', 'GO:0042246', 'GO:0008283', 'GO:0072359', 'GO:0072104', 'GO:0006959', 'GO:0007219', 'GO:1990798', 'GO:0002437', 'GO:0001944', 'GO:0060413', 'GO:0035622', 'GO:0002011', 'GO:0001889', 'GO:0043011', 'GO:0031018', 'GO:00…	26
Contig000989	['GO:0010951', 'GO:0051301']	1
Contig010113	['GO:0045600', 'GO:0030178', 'GO:0048856', 'GO:0016055']	3
Contig014133	['GO:0007186', 'GO:0007200', 'GO:0051480', 'GO:0051057', 'GO:0035025', 'GO:0007200', 'GO:0035023', 'GO:0001525']	5
Contig002718	['GO:0006364', 'GO:0044085', 'GO:0006338', 'GO:0009303']	2
Contig015158	[]	0
Contig011996	['GO:0043065']	1
Contig013244	['GO:0036503']	1
Contig015868	['GO:0090385', 'GO:0008104', 'GO:0090383', 'GO:0071346', 'GO:0015031', 'GO:0006886', 'GO:0046907']	3
Contig007923	['GO:0031175', 'GO:0000122', 'GO:0006325', 'GO:0098962', 'GO:0042542']	3
Contig013432	['GO:0030512', 'GO:0031214', 'GO:0030282', 'GO:0009888', 'GO:0070171', 'GO:0040011', 'GO:0016310', 'GO:1902617', 'GO:0048167', 'GO:0006468', 'GO:0038179', 'GO:0009755', 'GO:0050832']	8
Contig001554	['GO:0090201', 'GO:0009968', 'GO:0006915', 'GO:0043066', 'GO:0007007', 'GO:0010821', 'GO:0007005', 'GO:1905448']	3
Contig014435	['GO:0060041', 'GO:0050803', 'GO:0098742', 'GO:0007157', 'GO:0002934', 'GO:0002089', 'GO:0050807', 'GO:0098609', 'GO:0070166', 'GO:0007155', 'GO:0046718', 'GO:0008104', 'GO:0007156', 'GO:0006955', 'GO:0006826', 'GO:0007411', 'GO:0019062', 'GO:0051963', 'GO:1902414', 'GO:0048593']	8
Contig011940	['GO:0006874', 'GO:0090150', 'GO:0071816', 'GO:0033365', 'GO:1901546', 'GO:1902455', 'GO:0045892', 'GO:0006890', 'GO:0007275', 'GO:0030100', 'GO:0051453', 'GO:0016567', 'GO:0016043', 'GO:0045048', 'GO:0016192', 'GO:0006417', 'GO:0006486', 'GO:0090263', 'GO:0001755', 'GO:0007035', 'GO:2000036', 'GO:0030968', 'GO:0007005']	17
Contig006798	['GO:0043568', 'GO:0045926', 'GO:0048856', 'GO:1901862', 'GO:0044342', 'GO:0014070', 'GO:0050896', 'GO:0060056', 'GO:0048662', 'GO:0007275', 'GO:0043569', 'GO:1901698', 'GO:0014912', 'GO:0007565', 'GO:1904754', 'GO:0035556', 'GO:0007399', 'GO:0009952', 'GO:0071407', 'GO:0051146', '', 'GO:0030335', 'GO:0042127', 'GO:0043434', 'GO:0009968', 'GO:0060416', 'GO:0001558', 'GO:0017148', 'GO:0030336', 'G…	16
Contig001817	['GO:0006355', 'GO:0006357', 'GO:0045944']	3
Contig004952	['GO:0030490', 'GO:0006388', 'GO:0044237', 'GO:0000398', 'GO:0042274', 'GO:0051179', 'GO:0065003', 'GO:0000462', 'GO:0043386', 'GO:0055085', 'GO:0030010', 'GO:0000920', 'GO:0036211', 'GO:0008033', 'GO:0006396', 'GO:0030639', 'GO:0042254', 'GO:0055123', 'GO:0000480', 'GO:1901336', 'GO:0006364', 'GO:0022618', 'GO:0006996', 'GO:0000447', 'GO:0000472', 'GO:0010467', 'GO:0000027', 'GO:0000028', 'GO:19…	14
Contig012409	['GO:0032981', 'GO:0009060', 'GO:0065003', 'GO:0006120', 'GO:0007005', 'GO:0042776']	4
Contig012634	['GO:0007283', 'GO:0030154', 'GO:0005975']	3
Contig013144	['GO:0051493', 'GO:0030030', 'GO:1901673', 'GO:1902018', 'GO:0060236', 'GO:1902017', 'GO:0051726']	3
Contig012665	['GO:0061844', 'GO:0031640', 'GO:0097746', 'GO:0010628', 'GO:0010629', 'GO:0007218', 'GO:0051092', 'GO:0051897', 'GO:0008542']	6
Contig013497	['GO:0007507', 'GO:0009887', 'GO:0016310', 'GO:0007059', 'GO:0010224', 'GO:0009416', 'GO:0006468', 'GO:0007368', 'GO:0035330']	4
Contig008216	['GO:0007186', 'GO:0009968', 'GO:0008277', 'GO:0043547', 'GO:0007601']	4
Contig004018	['GO:0030422', 'GO:0034587', 'GO:0032259', 'GO:0001510', 'GO:0031047', 'GO:0010467', 'GO:0010629', 'GO:0008152']	7
Contig014176	['GO:0032981', 'GO:0009060', 'GO:0065003', 'GO:0006120', 'GO:0007005', 'GO:0042776']	4
Contig008981	['GO:0015711', '', 'GO:0046890', 'GO:0006814', 'GO:0035725', 'GO:0007420', 'GO:0021537', 'GO:0050890', 'GO:0010975', 'GO:0060856', 'GO:0150104', 'GO:1990379', 'GO:0006869', 'GO:0008594', 'GO:0019216', 'GO:0065003', 'GO:0055085', 'GO:0022604', 'GO:0043010', 'GO:0097009', 'GO:0051977', 'GO:0015909', 'GO:0030900', 'GO:0045056', 'GO:0150178', 'GO:0007399', 'GO:0031998', 'GO:0050773', 'GO:0008643', 'G…	16
Contig012339	['GO:0043010', 'GO:0032648', 'GO:0070936', 'GO:0043161', 'GO:0006915', 'GO:0016567', 'GO:0099546', 'GO:0050691', 'GO:0010468', 'GO:0099149', 'GO:0021549', 'GO:0006508']	5
Contig009465	['GO:0007009', 'GO:0007010', 'GO:0071709', 'GO:0072660', 'GO:0019228', 'GO:0072659', 'GO:0051179', 'GO:0045184', 'GO:0000281', 'GO:1902260', 'GO:0043001']	5
Contig006525	['GO:0045292', 'GO:0000398', 'GO:0045664', 'GO:0048666', 'GO:0006413', 'GO:0000388', 'GO:0000349', 'GO:0043010', 'GO:0000244', 'GO:0008380', 'GO:0071466', 'GO:0060322', 'GO:0006412', 'GO:0045694', 'GO:0048437', 'GO:0006414', 'GO:0006397', 'GO:0000375', 'GO:0009793', 'GO:0010628', 'GO:0036092', 'GO:0042220', 'GO:0006457', 'GO:1902802', 'GO:0010467', 'GO:0000387']	11
Contig003753	['GO:0000082', 'GO:0051301', 'GO:0007049', 'GO:0060828', 'GO:0016310', 'GO:0010468', 'GO:0000278', 'GO:0016055', 'GO:0006468', 'GO:0000086', 'GO:0044772', '', 'GO:0006355', 'GO:0051726', 'GO:0030111']	10
Contig012519	['GO:0007507', 'GO:0055010', 'GO:0086002', 'GO:0072659', 'GO:2000810', 'GO:0086064', 'GO:0007517', 'GO:0055088', 'GO:0048729', 'GO:0034334', 'GO:0086091', 'GO:0002934', 'GO:1900024', 'GO:0098911', 'GO:0045110', 'GO:0086005', 'GO:0098609', 'GO:0002159', 'GO:0086073', 'GO:0086003', 'GO:0007155', 'GO:0008104', 'GO:0045595', 'GO:0086001', 'GO:0016264', 'GO:0048496', 'GO:0048738', 'GO:0030336', 'GO:00…	8
Contig011412	['GO:0031145', 'GO:0006974', 'GO:0007049', 'GO:0050775', 'GO:0000077', 'GO:2001224', 'GO:0016567', 'GO:0031571', 'GO:0031146', 'GO:0006508']	6
Contig005221	['GO:0019483', 'GO:0016310', 'GO:0043562', 'GO:0006468', 'GO:0055085', 'GO:0006106', 'GO:0071474', 'GO:0006355', 'GO:0006412', 'GO:0006221', 'GO:0043086', 'GO:0044205', 'GO:0006210', 'GO:0009220', 'GO:0044238', 'GO:0006207', 'GO:0006222', 'GO:0032543', 'GO:0003009', 'GO:0008152', 'GO:0010468', 'GO:0006212']	13
Contig009947	['GO:0007186', 'GO:0007166']	2
Contig014592	['GO:0051301', 'GO:0048812', 'GO:0007049', 'GO:0016310', 'GO:0030010', 'GO:0000278', 'GO:0009416', 'GO:0006468', 'GO:0000226', 'GO:0018108']	6
Contig012143	['GO:0038203', 'GO:0048670', 'GO:0051897', 'GO:0071902', 'GO:0031549', 'GO:0009966', 'GO:0061000', 'GO:0030154', 'GO:0048671']	3
Contig004520	['']	0
Contig002253	['GO:0051259', 'GO:0051260']	2
Contig004721	['GO:0008285', 'GO:0035335', 'GO:0042127', 'GO:0001946', 'GO:0016311', 'GO:0006355', 'GO:0006351', 'GO:0006470', 'GO:0010468', 'GO:0032880', 'GO:0046825']	6
Contig012511	['GO:1905885', 'GO:0050790', 'GO:0032483', 'GO:0016042']	1
Contig003485	['GO:0022414', 'GO:0034587', 'GO:0043170', 'GO:0006996', 'GO:0045786', 'GO:0071514', 'GO:0010629', 'GO:0007140', 'GO:0031047', 'GO:0007281', 'GO:0007283', 'GO:0007141', 'GO:0016441', 'GO:0035194']	9
Contig013578	['GO:2001237', 'GO:0006629', 'GO:0018105', 'GO:0016477', 'GO:0048633', 'GO:0016310', 'GO:0034612', 'GO:0032879', 'GO:0014911', 'GO:0006468', 'GO:0031929', 'GO:0045727', 'GO:0051384', 'GO:0014070', 'GO:0043066', 'GO:0014732', 'GO:0001662', 'GO:0046324', 'GO:0045931', 'GO:0009410', 'GO:0000082', 'GO:0009749', 'GO:0045948', 'GO:0044539', 'GO:0031667', 'GO:0035556', 'GO:0071363', 'GO:0009636', 'GO:00…	20
Contig005889	['GO:0042127', 'GO:0008284', 'GO:0007173', 'GO:0070374', 'GO:0071364', 'GO:0071363', 'GO:0043410', 'GO:0051781']	4
Contig006002	['GO:0007168', 'GO:0035845', 'GO:0003031', 'GO:0007608', 'GO:0006182', 'GO:0006468', 'GO:0050911', 'GO:0042048', 'GO:0035556', 'GO:0010753', 'GO:0050896', 'GO:0008355', 'GO:0007601', 'GO:0009190']	6
Contig012443	['GO:0018105', 'GO:0071168', 'GO:0051640', 'GO:0016310', 'GO:0060041', 'GO:0051098', 'GO:0060341', 'GO:0007077', 'GO:0007098', 'GO:0051257', 'GO:0032434', 'GO:0140013', 'GO:0035556', 'GO:0007112', 'GO:0035046', 'GO:0000915', 'GO:0035050', 'GO:0030071', 'GO:0031398', 'GO:0051321', 'GO:0051726', 'GO:0051656', 'GO:0022414', 'GO:0045143', 'GO:0007140', 'GO:0031648', 'GO:0060631', 'GO:0000278', 'GO:00…	31
Contig014682	['GO:0016579', 'GO:0071108', 'GO:0006508']	1
Contig006649	['GO:2000045', 'GO:0051412', 'GO:0033197', 'GO:0051592', 'GO:0010971', 'GO:0000278', 'GO:0044321', 'GO:0009416', 'GO:0006468', 'GO:0043549', 'GO:0060749', 'GO:0033601', 'GO:0045737', 'GO:0014070', 'GO:0051384', 'GO:0008283', 'GO:0045931', 'GO:0000320', 'GO:0045892', 'GO:0031100', 'GO:0009410', 'GO:0000082', 'GO:0006974', 'GO:0033598', 'GO:0048593', 'GO:0001889', 'GO:0097421', 'GO:0070050', 'GO:00…	17
Contig000255	['GO:0007186', 'GO:0045987', 'GO:1903351', 'GO:0007271', 'GO:0098664', 'GO:0007213', 'GO:0007399', 'GO:0019722', 'GO:0036211', 'GO:0032412', 'GO:0007268', 'GO:0007197', 'GO:0095500', 'GO:1905144', 'GO:0045907', 'GO:0003056', 'GO:0071880', 'GO:0007187', 'GO:1904695', 'GO:0003063', 'GO:0032024', 'GO:0006939', 'GO:0046541']	9
Contig007280	['GO:0008380', 'GO:1903241', 'GO:0000398', 'GO:0010467', 'GO:0006355', 'GO:0019079', 'GO:0006357', 'GO:0032784']	5
Contig006631	['GO:0007178', 'GO:0018105', 'GO:0060412', 'GO:0016310', 'GO:0008584', 'GO:0048598', 'GO:0008354', 'GO:0051496', 'GO:0035556', 'GO:0071363', 'GO:0043065', 'GO:0045893', 'GO:0060021', 'GO:0031396', 'GO:0043410', 'GO:0042060', 'GO:0030154', 'GO:0051726', 'GO:0048705', 'GO:0022414', 'GO:2001235', 'GO:0051491', 'GO:0009888', 'GO:0046847', 'GO:0032924', 'GO:0060982', 'GO:0048701', 'GO:0044089', 'GO:00…	33
Contig011879	['GO:0045892', 'GO:0033599', 'GO:0000122', 'GO:0048706', 'GO:0009653', 'GO:0001843', 'GO:0045893', 'GO:0009792', 'GO:0007281', 'GO:0007399', 'GO:0045944', 'GO:0006357', 'GO:0006366', 'GO:0001662', 'GO:0008542']	9
Contig015385	['GO:0051225', 'GO:0000724', 'GO:0051301', 'GO:0007049', 'GO:0036297', 'GO:0000226', 'GO:0060216', 'GO:0006302', 'GO:0007098', 'GO:0019985']	8
Contig004031	['GO:0019276', 'GO:0006044', 'GO:0006486', 'GO:0008152', 'GO:0015012']	4
Contig001677	['GO:0014743', 'GO:0043403', 'GO:0007520', 'GO:0014905', 'GO:1904206', 'GO:0007517', 'GO:0045026']	1
Contig009067	['GO:0008643', 'GO:0006974', 'GO:0006520', 'GO:0006281', '', 'GO:0030514', 'GO:0008152', 'GO:0006302', 'GO:0006538']	7
Contig015068	['GO:0030497', 'GO:0006629', 'GO:0006633', 'GO:0007266', 'GO:0016601', 'GO:0044255', 'GO:0007249', 'GO:0030148', 'GO:0046726', 'GO:0008610', 'GO:0042761', 'GO:0035556', 'GO:0007264', 'GO:0050790', 'GO:0045070', 'GO:0007254', 'GO:0006631']	10
Contig005483	['', 'GO:0071962', 'GO:0034087', '', 'GO:0000278', 'GO:0010467', 'GO:0006474', 'GO:0007064']	3
Contig004425	[]	0
Contig010131	['GO:0045944', 'GO:0090691', 'GO:0010199', 'GO:0051252', 'GO:1903798', 'GO:0006355', 'GO:0048731', 'GO:0090304', 'GO:0007120', 'GO:0006338', 'GO:0008104', 'GO:0007049', 'GO:1900036', 'GO:0061161', 'GO:0010449', 'GO:0051301', 'GO:0061572', 'GO:0006325', 'GO:0040029', 'GO:0010468', 'GO:0007121', 'GO:0000282']	10
Contig008226	['GO:0007118', 'GO:0000160', 'GO:2000100', 'GO:0045292', 'GO:0016310', 'GO:0034727', 'GO:0006281', 'GO:0062200', 'GO:0043161', 'GO:2000144', '', '', 'GO:0006468', 'GO:0015031', 'GO:0006605', 'GO:0006351', 'GO:0045944', 'GO:0002639', 'GO:0006413', 'GO:0046907', 'GO:0060717', 'GO:0006974', 'GO:0000209', 'GO:1902749', '', 'GO:0035556', 'GO:0050776', '', 'GO:0050793', '', 'GO:0006355', 'GO:0006897', …	37
Contig004524	['GO:0045892', 'GO:0042754', 'GO:0042752', 'GO:0048511']	3
Contig004505	['GO:0006468', 'GO:0016310', 'GO:0051301', 'GO:0007049']	2
Contig002063	['GO:0048856', 'GO:0140367', 'GO:0006351', 'GO:0045944', 'GO:0006959', 'GO:0007275', 'GO:0006355', 'GO:0007040', 'GO:0002376', 'GO:0009267', 'GO:0001892', 'GO:0010508', 'GO:0010468', 'GO:0022010', 'GO:0045893', 'GO:0006955', 'GO:0002250', 'GO:0034198', 'GO:0006357', 'GO:0032418', 'GO:0050829', 'GO:0006914']	15
Contig004287	['GO:0006470', 'GO:0043086', 'GO:0019222', 'GO:0043065', 'GO:0016310', '', 'GO:0045444', 'GO:0016311', 'GO:0042981', 'GO:2001242', 'GO:0010975', 'GO:0009966', 'GO:0035556', 'GO:2001244', 'GO:0010976', 'GO:0062030']	5
Contig008103	['GO:0003009', 'GO:0071474']	0
Contig013722	['GO:0007507', 'GO:2000045', 'GO:0060707', 'GO:0032091', 'GO:0031397', 'GO:0045944', 'GO:0030111', 'GO:0009950', 'GO:0097190', 'GO:0016055', 'GO:0006919', 'GO:0060711', 'GO:0051028', 'GO:0016926', 'GO:0032875', 'GO:0001934', 'GO:0031398', 'GO:0035562', 'GO:0045444', 'GO:0006508', 'GO:0051246', 'GO:0060712', 'GO:0031648', 'GO:0015031']	9
Contig011492	['GO:1902895', 'GO:1901653', 'GO:0045944', 'GO:0001525', 'GO:0035914', 'GO:0014908', 'GO:0030033', 'GO:0014901', 'GO:1990830', 'GO:0014816', 'GO:0006355', 'GO:0071407', 'GO:0060576', 'GO:0045600', 'GO:0010468', 'GO:0007267', 'GO:0045893', 'GO:0048565', 'GO:0099156', 'GO:0061586', 'GO:0008284', 'GO:0000122', 'GO:0043403', 'GO:0032534', 'GO:0006357']	8
Contig001980	['GO:0007168', 'GO:0031284', 'GO:0007267', 'GO:0007602', 'GO:0031282', 'GO:0007589', 'GO:0050896', 'GO:0007601']	4
Contig013660	['GO:1900376', 'GO:0071467', 'GO:1900198', 'GO:0030335', 'GO:0097264', 'GO:0015031', 'GO:0010632', 'GO:0010634', 'GO:0042318', 'GO:0006508']	4
Contig000293	['GO:0043086', 'GO:0055074', 'GO:0043065', 'GO:2000145', 'GO:0007596', 'GO:0051592', 'GO:0050819', 'GO:1902721', 'GO:0097211', 'GO:0030195', 'GO:0070588', 'GO:0043066', '', 'GO:1901317', 'GO:0007599']	8
Contig014146	['GO:0070574', 'GO:0034219', 'GO:1902600', 'GO:0006829', 'GO:0009399', 'GO:0090504', 'GO:0030001', 'GO:0045944', 'GO:0098655', '', 'GO:0055085', 'GO:0045892', 'GO:0006882', 'GO:0071577', '', 'GO:0008544', 'GO:0001964', 'GO:0071466', 'GO:0006355', 'GO:0060325', 'GO:0008643', 'GO:0030917', 'GO:0034755', 'GO:0006879', 'GO:0032956', 'GO:0048703', 'GO:0042711', 'GO:0000122', 'GO:0034220', 'GO:0001843'…	18
Contig012793	['GO:0006108', 'GO:0006734', 'GO:0044283', 'GO:0006094', 'GO:0006739', 'GO:0044281', 'GO:0006099', '', 'GO:0006107', 'GO:0019674', 'GO:0019752']	6
Contig002513	[]	0
Contig014485	['GO:0031053', 'GO:0072091', 'GO:0010467', 'GO:0010629']	4
Contig003454	['GO:0022414', 'GO:0007507', 'GO:0007611', 'GO:0060287', 'GO:0008104', 'GO:0060411', 'GO:0030317', 'GO:0003356', 'GO:0003351', 'GO:0007368', 'GO:0003341', 'GO:0035545', 'GO:0120229', 'GO:0007018']	4
Contig007948	['GO:0045892', 'GO:0072089', 'GO:0007398', '', 'GO:0006325', 'GO:0048863', 'GO:0010629', 'GO:0006355', '']	3
Contig002211	['GO:0051591', 'GO:0001937', 'GO:0009653', 'GO:0003340', 'GO:0007259', 'GO:0002053', 'GO:0019221', 'GO:0072183', 'GO:0014070', 'GO:0033209', 'GO:0034341', 'GO:0008283', 'GO:0035458', 'GO:0045944', 'GO:0051607', 'GO:0008015', 'GO:0061326', 'GO:0051770', 'GO:0009410', 'GO:0071357', 'GO:1901698', 'GO:0048762', 'GO:0043124', 'GO:0045648', 'GO:0046725', 'GO:0006355', 'GO:0050680', 'GO:0045087', 'GO:00…	22
Contig009138	['GO:0007059', 'GO:0000278', 'GO:0006468', 'GO:0043549', 'GO:0051649', 'GO:1901970', 'GO:0051257', 'GO:0051225', 'GO:0007052', 'GO:0032147', 'GO:0071902', 'GO:0090267', 'GO:1902412', 'GO:0032465', 'GO:0007049', 'GO:1902425', 'GO:0001934', 'GO:0000070', 'GO:0051321', 'GO:0051726', 'GO:0022414', 'GO:0000280', 'GO:0051301', 'GO:0006996', 'GO:0051256', 'GO:0061640', 'GO:0051310', 'GO:0000281', 'GO:19…	14
Contig009637	[]	0
Contig000045	['GO:0036005', 'GO:0045124', 'GO:0007059', 'GO:0032571', 'GO:0030500', 'GO:0044342', 'GO:0014070', 'GO:0051384', 'GO:0032024', 'GO:0009410', 'GO:0031667', 'GO:0033594', 'GO:0071363', 'GO:0007155', 'GO:0031016', 'GO:1900076', 'GO:0009612', 'GO:0031214', 'GO:0007049', 'GO:0044242', 'GO:0034224', 'GO:0002076', 'GO:0032868', 'GO:0032869', 'GO:0001503', 'GO:0033280', 'GO:0043627', '', 'GO:0042593', 'G…	12
Contig000365	['GO:0001711', 'GO:0045638', 'GO:0031124', 'GO:0048856', 'GO:0006351', '', 'GO:0045944', 'GO:0043066', 'GO:0065003', '', 'GO:0045786', 'GO:0007369', 'GO:0006368', 'GO:1902808', 'GO:2000134', 'GO:0031442', 'GO:0050680', 'GO:0016055', '', 'GO:0045595', 'GO:0071222', 'GO:0007049', 'GO:0001558', 'GO:0048147', 'GO:0045165', 'GO:0019827', 'GO:0030177', 'GO:0051726', 'GO:0008285', 'GO:0051301', 'GO:0000…	17
Contig011128	['GO:0006629', 'GO:0034378', 'GO:0045944', 'GO:2001244', 'GO:0006351', 'GO:0009791', 'GO:0006357']	4
Contig013593	['GO:0007015', 'GO:0032465', 'GO:0030050', 'GO:0099518', 'GO:0030036', 'GO:0090140', 'GO:0048731', 'GO:0010821', 'GO:0051726', 'GO:0034642', 'GO:0046907']	6
Contig002794	['GO:0016050', 'GO:0016236', 'GO:0048280', 'GO:0016197', 'GO:0048193', 'GO:0006906', 'GO:0090161', 'GO:0006896', 'GO:0006892', 'GO:0016189', 'GO:0048284', 'GO:0046907', 'GO:0007034', 'GO:0006890', 'GO:0050882', 'GO:0006891', 'GO:0061025', 'GO:0006886', 'GO:0006888', 'GO:0008104', 'GO:0016192', 'GO:0032456', 'GO:0007030', 'GO:0042147', 'GO:0006914', 'GO:0015031']	12
Contig015992	['GO:0044255', 'GO:0097502', 'GO:0010038', 'GO:0051592', 'GO:0006488', 'GO:0006487', 'GO:0009058', 'GO:0006486', 'GO:0070085', 'GO:0006488']	6
Contig006799	['GO:0007507', 'GO:0090090', 'GO:0051384', 'GO:0014070', 'GO:0001525', 'GO:0009410', 'GO:0048640', 'GO:0007565', 'GO:0032870', 'GO:0050671', 'GO:0032355', 'GO:0009612', 'GO:0008156', 'GO:0048545', 'GO:0042127', 'GO:0043434', 'GO:0042104', 'GO:0032868', 'GO:0010226', 'GO:0032526', 'GO:0043627', '', 'GO:0008285', 'GO:0022407', 'GO:0045927', 'GO:0008284', 'GO:0042129', 'GO:0007584', 'GO:0043567']	9
Contig007955	['GO:0002376', 'GO:0006383', 'GO:0006384', 'GO:0006139', 'GO:0051607', 'GO:0006351', 'GO:0045087', 'GO:0006352']	6
Contig011038	['GO:0007611', 'GO:0051091', 'GO:0001541', 'GO:0007420', 'GO:0070374', 'GO:0042311', 'GO:0006351', 'GO:0045944', 'GO:0014070', 'GO:0008283', 'GO:0001662', '', 'GO:0048662', 'GO:0033993', 'GO:0030521', 'GO:0006355', 'GO:0050680', 'GO:0030522', 'GO:0050673', 'GO:0071407', 'GO:0030518', 'GO:0048545', 'GO:0042127', 'GO:0071392', 'GO:0060011', 'GO:0043065', 'GO:0007267', 'GO:2000378', 'GO:0045893', 'G…	18
Contig000805	['GO:0048538', 'GO:0032501', 'GO:0000398', 'GO:0006334', 'GO:0071425', 'GO:0008610', 'GO:0006413', 'GO:0065003', 'GO:1903003', 'GO:0008299', 'GO:0000244', 'GO:0019222', 'GO:0008380', 'GO:0048872', '', 'GO:0030098', 'GO:0006406', 'GO:0006412', '', 'GO:0006396', 'GO:0006397', 'GO:0044255', 'GO:0006338', 'GO:0034728', 'GO:0097010', 'GO:0032502', 'GO:0006417', 'GO:0031017', 'GO:0030097', 'GO:0001731'…	17
Contig008613	['GO:0048513', 'GO:0001570', 'GO:0050878', 'GO:0006508', 'GO:0060958', 'GO:0009653', 'GO:0003007', 'GO:0048468', 'GO:0048570', 'GO:0003160', 'GO:0007155', 'GO:0003250', 'GO:0048731']	7
Contig006406	['GO:0007015', 'GO:0030050', 'GO:0010468', 'GO:0045944', 'GO:0006355', 'GO:0006351', 'GO:0006357', 'GO:0048731', 'GO:0007605']	8
Contig014542	['GO:1900273', 'GO:0006470', 'GO:0043407', '', 'GO:0016311', 'GO:0035902', 'GO:1903955', 'GO:2001025', 'GO:0001934', 'GO:0010976', 'GO:0042307', 'GO:0002092', 'GO:0035640', 'GO:0035335']	2
Contig001011	['GO:0031334', 'GO:0043161', 'GO:0045861', 'GO:0008219', 'GO:0051216', 'GO:0019222', 'GO:0042176', 'GO:1901698', 'GO:0034976', 'GO:0061060', 'GO:0002814', 'GO:0045732', 'GO:0030155', 'GO:0050790', 'GO:0036503', '', 'GO:0008152', 'GO:0043065', 'GO:0045740', 'GO:0006915', 'GO:0006457', 'GO:0060037', 'GO:0009889', 'GO:0031101', 'GO:0006508', 'GO:1902043', 'GO:0031323', 'GO:0051246', '', 'GO:0006511'…	15
Contig001836	['GO:0034372', 'GO:0006629', 'GO:0055091', 'GO:0042632', 'GO:0010874', 'GO:0006869', 'GO:0034374', 'GO:0055088', 'GO:0032376', 'GO:1901615', 'GO:0006066', 'GO:0034197', 'GO:0015850', 'GO:0044255', 'GO:0010745', 'GO:0070328', 'GO:0030301', 'GO:0046470', 'GO:2001140', 'GO:0034375', 'GO:0008203', 'GO:0043691', 'GO:0008202', 'GO:0015914', 'GO:0120009', 'GO:0006641']	14
Contig006526	['GO:0030030', 'GO:0003351', 'GO:0043549', 'GO:0048598', 'GO:0065003', 'GO:0003146', 'GO:0048729', 'GO:0060287', 'GO:0099111', 'GO:0003143', 'GO:0061371', 'GO:0070286', 'GO:0036159', 'GO:0090660', 'GO:0071907', 'GO:0060271', 'GO:0030335', 'GO:0001947', 'GO:0048565', 'GO:0003341', 'GO:0001934', 'GO:0043410', 'GO:0008284', 'GO:0006858', 'GO:0036158', 'GO:0007368', 'GO:0001578']	11
Contig002367	['GO:0051225', 'GO:0031023', 'GO:0051301', 'GO:0065003', 'GO:0007049', 'GO:0097435', 'GO:0007020', 'GO:0000226', 'GO:0031109', 'GO:0007098']	6
Contig011892	['GO:0060326', 'GO:0007204', 'GO:0021557', 'GO:0006935', 'GO:0007186', 'GO:0048812', 'GO:0016310', 'GO:0090043', 'GO:0070374', 'GO:0000278', 'GO:0000398', 'GO:0043161', 'GO:0032781', 'GO:1902230', 'GO:0006468', 'GO:0043462', 'GO:0034975', 'GO:0070098', 'GO:0001525', 'GO:0071897', 'GO:0030010', 'GO:1901698', 'GO:0034976', 'GO:0006260', 'GO:1905322', 'GO:0031623', 'GO:0035556', 'GO:0019722', 'GO:00…	28
Contig000142	['GO:0006511', 'GO:0007032', 'GO:0035063', 'GO:0070536', 'GO:0007264', 'GO:0032731', 'GO:0007265', 'GO:0032741', 'GO:2001056', 'GO:0016579', 'GO:0035556', 'GO:1900227', 'GO:0071108', 'GO:0006508']	5
Contig005232	['GO:0006397', 'GO:0008380', 'GO:0043484', 'GO:0010468', 'GO:0042669']	4
Contig013138	['GO:0006397', 'GO:0008380', 'GO:0031048', 'GO:0031507', 'GO:0000381', 'GO:0010629', 'GO:0010468']	6
Contig004875	['GO:0008156', 'GO:0051301', 'GO:0000077', 'GO:0006974', '', 'GO:0007049', 'GO:0000278', 'GO:0007095', 'GO:0006260', 'GO:0033260', 'GO:0008152', 'GO:0051726']	8
Contig007063	['GO:0061817', 'GO:2001256']	2
Contig012513	['GO:0015889', 'GO:0006511', 'GO:0006897', 'GO:0031146', 'GO:0006508']	5
Contig007720	['GO:1903232', 'GO:0060155', 'GO:0006996', 'GO:0043473', 'GO:0046907']	2
Contig011605	['GO:0006355', 'GO:0006357', 'GO:0048856']	3
Contig003509	['GO:0045214', 'GO:0007015', 'GO:0006936', 'GO:0030036', 'GO:0030041', 'GO:0030239', 'GO:0045010', 'GO:0051694', 'GO:0051693', 'GO:0030838', 'GO:0032956']	10
Contig010024	['GO:0048513', 'GO:0051056', 'GO:0048468', 'GO:0043087', 'GO:0090630', 'GO:0035556', 'GO:0034260', 'GO:0043547']	5
Contig012453	['GO:0030201', 'GO:0015012']	2
Contig011374	['GO:2000065', 'GO:0043407', 'GO:0007178', '', 'GO:0070374', 'GO:0021978', 'GO:0035051', 'GO:1900745', 'GO:0061036', 'GO:1905222', 'GO:0045892', 'GO:0007219', 'GO:0051216', 'GO:0050769', 'GO:0071363', 'GO:0016055', 'GO:0048513', 'GO:0043065', 'GO:0030509', 'GO:0045893', 'GO:0045599', 'GO:0048708', 'GO:0043410', 'GO:0030154', 'GO:0030177', 'GO:0051726', 'GO:0051042', 'GO:0003181', 'GO:0010922', 'G…	32
Contig001108	['GO:0007420', 'GO:0008283', 'GO:0032446', 'GO:0000209', 'GO:0016567', 'GO:0070979', 'GO:0044770', 'GO:0006355', 'GO:0036211', 'GO:0071407', 'GO:0051443', 'GO:0048545', 'GO:0045893', 'GO:0031398', 'GO:0071385', 'GO:1903955', 'GO:0071383', 'GO:0006511', 'GO:0006508']	8
Contig004628	['GO:0006397', 'GO:0008380', 'GO:0045292', 'GO:0015918', 'GO:0000398', 'GO:0006813', 'GO:0006355', 'GO:0030001', 'GO:0006869', 'GO:0006811']	9
Contig003688	['GO:0006082', 'GO:0016070', 'GO:0032543', 'GO:0006520', 'GO:0016070', 'GO:0010467', 'GO:0006412', 'GO:0031647', 'GO:0008152', 'GO:0070681']	5
Contig010136	['GO:2001237', 'GO:0045739', 'GO:0006281', 'GO:0009653', 'GO:0048856', 'GO:0043066', 'GO:0007605', '', 'GO:0006974', 'GO:0019222', 'GO:0006470', 'GO:0035335', 'GO:0006302', 'GO:0030154', 'GO:0007601', 'GO:0014706', 'GO:0006325', 'GO:0006974', 'GO:2001240', 'GO:0010212']	11
Contig014506	['GO:0006836', 'GO:0006888', 'GO:0046928', 'GO:0007030', 'GO:0016079', 'GO:0007029', 'GO:0016192', 'GO:0051649', 'GO:0050896', 'GO:0006887', 'GO:0007601', 'GO:0007268']	9
Contig004143	['GO:0001775', 'GO:0030183', 'GO:0048813', 'GO:0002315', 'GO:0050808', 'GO:0030334', 'GO:0060997', 'GO:0006955', 'GO:0035556', 'GO:0007264', 'GO:0030182', 'GO:0050790', 'GO:0001782', 'GO:0043547']	7
Contig004893	['GO:0006974', 'GO:0007049', 'GO:0006281', 'GO:0000278', 'GO:0006334', 'GO:0006260', 'GO:0006351', 'GO:0006335', 'GO:0065003']	8
Contig000655	['GO:0030218', 'GO:0044237', 'GO:0006779', 'GO:0043161', 'GO:0009416', 'GO:0006778', '', 'GO:0006783', 'GO:0046501', 'GO:0006091', 'GO:0008152', 'GO:0009410', '', 'GO:0046984', 'GO:0042592', 'GO:0070541', 'GO:0043249', 'GO:0010038', 'GO:0051597', 'GO:0017085', 'GO:0042168', 'GO:0010288', 'GO:0046685', 'GO:0030097', 'GO:0071549', 'GO:0030154', 'GO:0010999', 'GO:0045471', 'GO:0008152', 'GO:0008203'…	12
Contig015357	[]	0
Contig008761	['GO:0071555', 'GO:0006817', 'GO:1990547', 'GO:0006839', 'GO:0035435', 'GO:0009651', 'GO:0045489', 'GO:0006812', 'GO:0055085']	5
Contig005801	['GO:0048513', 'GO:0009887', 'GO:0009968', 'GO:0007405', 'GO:0048705', 'GO:0033333', 'GO:0060441', 'GO:0045879', 'GO:0040036', 'GO:0048856', 'GO:0010951', 'GO:0009953', 'GO:0016525', 'GO:0043066', 'GO:0048635']	4
Contig013076	['GO:0002082', 'GO:0034551', 'GO:0006351', 'GO:0065003', 'GO:0031930', 'GO:0055085', 'GO:1990314', 'GO:0006864', 'GO:1990519', 'GO:0000002', 'GO:0042127', 'GO:0001558', 'GO:0032869', 'GO:0030307', 'GO:0006390', 'GO:0008284', 'GO:1903426', 'GO:0051881', 'GO:0007005']	7
Contig000528	['GO:0043536', 'GO:0070374', 'GO:0051781', 'GO:0021762', 'GO:0051897', 'GO:0043406', 'GO:0072089', 'GO:0044344', '', 'GO:0090050', 'GO:0048731', 'GO:0050673', 'GO:0048513', 'GO:0070371', 'GO:0045893', 'GO:0090263', 'GO:0042060', 'GO:0043410', 'GO:0051726', 'GO:0021930', '', 'GO:2000738', 'GO:0051209', 'GO:0006366', 'GO:1904707', 'GO:0060045', 'GO:2000573', 'GO:0045944', 'GO:0008283', 'GO:0061045'…	21
Contig002685	['GO:0008283', 'GO:0030198', 'GO:0008284']	3
Contig002307	['GO:0006629', 'GO:0007186', 'GO:0016477', 'GO:0046339', 'GO:0016310', 'GO:0051966', 'GO:0008610', 'GO:0009966', 'GO:0006654', 'GO:0035556', 'GO:0031571', 'GO:0046486', 'GO:0044255', 'GO:0046580', 'GO:0043086', 'GO:0099562', 'GO:0007200', 'GO:0007265', 'GO:0046834', 'GO:0045930', 'GO:0050860', '', 'GO:0030168']	12
Contig007208	['GO:0008285', 'GO:0050884', 'GO:0010839', 'GO:0048856', 'GO:0038195', 'GO:0030336', 'GO:0007626', 'GO:2000272', 'GO:0007155', 'GO:0001775', 'GO:0030154']	6
Contig011878	['GO:0048148', 'GO:0021514', 'GO:0007186', 'GO:0043266', 'GO:0001963', 'GO:0051966', 'GO:0042596', 'GO:0007212', 'GO:0099149', 'GO:1903351', 'GO:0001975', 'GO:0034765', 'GO:0014059', 'GO:0021520', 'GO:0065008', 'GO:0043406', 'GO:0098664', 'GO:0007194', 'GO:1901698', 'GO:0042752', 'GO:0007189', 'GO:0051967', 'GO:0071407', 'GO:0007268', 'GO:0007200', 'GO:0007193', 'GO:0034776', 'GO:0033674', 'GO:00…	13
Contig009006	['GO:0016042', 'GO:0008643', 'GO:0015749', 'GO:0008645', 'GO:0015755', 'GO:0006644', 'GO:0050482', 'GO:1904659', 'GO:0006811', 'GO:0055085']	6
Contig009241	['GO:0016070', 'GO:0001514', 'GO:0016070', 'GO:0006417', 'GO:0010467', '', 'GO:0009058', 'GO:0001717', 'GO:0010468', 'GO:0006412', 'GO:0008152']	7
Contig014638	['GO:0007186', 'GO:0046890', 'GO:0007179', 'GO:0001541', 'GO:0009966', 'GO:0045944', 'GO:0008406', 'GO:0046660', 'GO:0030728', 'GO:0010893', 'GO:0007565', 'GO:0007276', 'GO:0010469', 'GO:0007292', 'GO:0045780', 'GO:0010817', 'GO:0042699', 'GO:0030335', 'GO:0060011', 'GO:0010628', 'GO:0006701', 'GO:0045670', 'GO:0048609', 'GO:0022414', 'GO:0008284', 'GO:0007530', 'GO:0007283', 'GO:0008585', 'GO:00…	11
Contig002098	['GO:0048513', 'GO:0007015', 'GO:0007507', 'GO:0007010', 'GO:0043154', 'GO:0001947', 'GO:0001933', 'GO:0051017', 'GO:0045944', 'GO:0043066', 'GO:0016043', 'GO:1903305', 'GO:0030042', 'GO:0019417']	8
Contig004436	['', 'GO:0071705', '', 'GO:0006508', 'GO:0140466', 'GO:1903331', 'GO:0034755', 'GO:1903427', 'GO:0015886', 'GO:0006879', 'GO:0033036', 'GO:0016226', 'GO:0070455', 'GO:0055085']	8
Contig007162	['', 'GO:0006338', 'GO:0017196', 'GO:0034728', '', '', 'GO:0007059', 'GO:0008283', 'GO:0006334', 'GO:0006325', 'GO:0010467', 'GO:0006474', 'GO:0006473', 'GO:0065003', '']	6
Contig004815	['GO:0007188', 'GO:0007186', 'GO:0007200', 'GO:0051480', 'GO:0001835', 'GO:0007275', 'GO:0051057', 'GO:0035025', 'GO:0048856', 'GO:0007200', 'GO:0035023', 'GO:0001525']	6
Contig006606	['GO:0006357', 'GO:0001501', 'GO:0000122', 'GO:0019233', 'GO:0007625', 'GO:0008344', 'GO:0045638', 'GO:0048920', 'GO:0021516', 'GO:0048704', 'GO:0006355', 'GO:0009952', 'GO:0008283', 'GO:0048705']	5
Contig000109	['GO:0007507', 'GO:0050936', 'GO:0001711', 'GO:0045638', '', 'GO:0045944', 'GO:0006351', 'GO:0035987', '', 'GO:0021529', 'GO:0014032', 'GO:0019222', 'GO:0007369', 'GO:0006368', 'GO:0016567', 'GO:0031442', 'GO:0016055', '', 'GO:0045595', 'GO:0001706', 'GO:0034243', 'GO:0021782', 'GO:0045165', 'GO:0019827', 'GO:0032784', 'GO:0009888', 'GO:0032968', 'GO:0010467', 'GO:0048701', '', 'GO:0006366', 'GO:…	13
Contig009859	['GO:1901615']	1
Contig012816	['GO:0015711', 'GO:0015734', 'GO:0098656', 'GO:0001678', 'GO:0071470', 'GO:0034214', 'GO:0019725', 'GO:0051259', 'GO:0015698', 'GO:0015810', 'GO:0042593', 'GO:0065003', 'GO:0006811']	7
Contig014718	['GO:0030490', 'GO:0016310', 'GO:0000398', 'GO:0042274', 'GO:0006468', 'GO:0036093', 'GO:0040026', 'GO:0008406', 'GO:0060252', 'GO:0051252', 'GO:0048477', 'GO:0046579', 'GO:0006397', 'GO:0042254', 'GO:2000234', 'GO:0002119', 'GO:0051321', 'GO:0006364', 'GO:0043409', 'GO:0010467', 'GO:0007281', 'GO:0010468']	11
Contig002267	['GO:0006520', 'GO:0009058']	2
Contig000436	['GO:1990966', 'GO:0006974', 'GO:0006139', 'GO:0006282', 'GO:0005975', 'GO:0044281', '', 'GO:0009225']	5
Contig009032	['GO:0071444', 'GO:0007188', 'GO:0007186', '', 'GO:0007193', 'GO:0098664', 'GO:1901698', 'GO:2000243', 'GO:0007265', 'GO:0035556', 'GO:0014070', 'GO:0007266']	6
Contig002375	['GO:0032787', 'GO:0006693', 'GO:0006629', 'GO:0006631']	4
Contig006330	['GO:0034446', 'GO:0000902', 'GO:0031589', 'GO:0030036', 'GO:0030036', 'GO:0007155', 'GO:0007163', 'GO:0030031', 'GO:0007160']	4
Contig014547	['GO:1903774', 'GO:0061024', 'GO:0016236', 'GO:0043162', 'GO:0030216', 'GO:0048856', 'GO:1903551', 'GO:0043549', 'GO:0039702', 'GO:0045892', 'GO:0043405', 'GO:0044085', 'GO:1903543', 'GO:0036258', 'GO:0090148', 'GO:0043170', 'GO:0036211', 'GO:0006513', 'GO:0008333', 'GO:0007049', 'GO:0043328', 'GO:0042059', 'GO:0007175', 'GO:0001558', 'GO:0045893', 'GO:0046755', 'GO:0019076', 'GO:0030154', 'GO:00…	17
Contig006129	['GO:0006656', 'GO:0071705', 'GO:0015871', 'GO:0015695', 'GO:0055085']	3
Contig006725	['GO:0048172', 'GO:0006814', 'GO:0035725', 'GO:1902600', 'GO:0048854', 'GO:0009416', 'GO:0021860', 'GO:0055085', 'GO:0035641', 'GO:0051453', 'GO:0048168', 'GO:0050801', 'GO:0006811', 'GO:0030641', 'GO:0006885', 'GO:0015698', 'GO:0006486', 'GO:0007601', 'GO:0098656', 'GO:0006820', 'GO:0006821', 'GO:0035264', 'GO:0015701', 'GO:0009791']	14
Contig010479	['GO:0002181', 'GO:0007155', 'GO:0065003', 'GO:0030855', 'GO:0010467', 'GO:0098609', 'GO:0006412', 'GO:0000028']	6
Contig005760	['GO:0031214', 'GO:0030282', 'GO:0009888', 'GO:0007229', 'GO:0001649', 'GO:0001503', 'GO:0030198', 'GO:0071363', 'GO:0045785', 'GO:0007155']	8
Contig007696	['GO:2000145', 'GO:0072091', 'GO:0010812', 'GO:2000647', 'GO:0010811', 'GO:0022604', 'GO:0072378', 'GO:0070373', 'GO:0019222', 'GO:0048146', 'GO:0010952', 'GO:0040017', 'GO:0071635', 'GO:0007566', 'GO:0030155', 'GO:2000146', 'GO:0048513', 'GO:1904188', 'GO:0042127', 'GO:0045595', 'GO:0043408', 'GO:0010628', 'GO:1900025', 'GO:0042060', 'GO:0008285', 'GO:1904237', 'GO:0050878', 'GO:0043409', 'GO:00…	11
Contig012860	['GO:0006366', 'GO:0008152', 'GO:0006351']	3
Contig000378	['GO:0008209', 'GO:0006066', 'GO:0044255', 'GO:0016126', 'GO:0048568', 'GO:0006695', 'GO:0006703', 'GO:0048706', 'GO:0006629', 'GO:0007420', 'GO:1901615', 'GO:0007399', 'GO:0008202', 'GO:0006694', 'GO:0030154', 'GO:0016125']	11
Contig005246	['GO:0006590', 'GO:0044237', 'GO:0048589', 'GO:0010817', 'GO:0042403', 'GO:0043171', '', '', 'GO:0042246', 'GO:0008152', 'GO:0006508']	4
Contig002860	['GO:0006629', 'GO:0046940', 'GO:0001682', 'GO:0090646', 'GO:0006637', 'GO:0015031', 'GO:0008610', 'GO:0007339', 'GO:0035803', 'GO:0006082', 'GO:0097745', 'GO:2000344', 'GO:0090304', 'GO:0006897', 'GO:0008033', 'GO:0006338', 'GO:0006633', 'GO:0008152', '', 'GO:0030154', 'GO:0030497', 'GO:0035336', 'GO:0019915', 'GO:0006083', 'GO:0006233', 'GO:0010467', '', 'GO:0006631']	19
Contig013131	[]	0
Contig002772	[]	0
Contig011209	['GO:0007169']	1
Contig002921	['GO:0045595', 'GO:0030900', 'GO:0045666', 'GO:0030514', 'GO:0007399', 'GO:0010811']	4
Contig003942	[]	0
Contig000183	['GO:0022900']	1
Contig000982	['GO:0009062', 'GO:0044255', 'GO:0006631']	3
Contig015707	['GO:0010467', 'GO:0034243', 'GO:0008152', 'GO:0016180']	4
Contig015469	['GO:0048384', 'GO:0006351', 'GO:0045944', 'GO:2001014', 'GO:0019216', 'GO:0055088', 'GO:0009725', 'GO:0045892', 'GO:0097009', 'GO:0042752', 'GO:0006355', 'GO:0006412', 'GO:0030522', 'GO:0050727', 'GO:0048512', 'GO:0050728', 'GO:0045893', 'GO:0030154', 'GO:0048511', 'GO:0000122', 'GO:0009755']	12
Contig014724	['GO:0019430', 'GO:0098869', 'GO:0034599', 'GO:0045454', 'GO:0043161', 'GO:0050896']	5
Contig005594	['GO:0071394', 'GO:0034599', 'GO:0002181', 'GO:0019222', 'GO:0010646', 'GO:0010467', 'GO:2000825', 'GO:0030521', 'GO:0019222']	2
Contig013272	['GO:0007178', 'GO:0007493', 'GO:0032927', 'GO:0016310', 'GO:0009653', 'GO:0006468', 'GO:0009966', 'GO:0045944', 'GO:1901165', 'GO:0038092', 'GO:0000082', 'GO:0045648', 'GO:0009953', 'GO:0080090', 'GO:0007399', 'GO:0071363', 'GO:0006355', 'GO:0019222', 'GO:0060936', 'GO:0001942', 'GO:0097191', 'GO:0001706', '', 'GO:0010628', 'GO:0060255', 'GO:0006915', 'GO:0051239', 'GO:0010629', 'GO:0001707', 'G…	18
Contig000713	['GO:0051085', 'GO:0050821']	1
Contig011708	['GO:0006629', 'GO:0001682', 'GO:0006633', 'GO:0008610', '', '', '', 'GO:0006631']	5
Contig012564	['GO:0007507', 'GO:0051301', 'GO:0007049', 'GO:0051028', 'GO:0007059', 'GO:0006913', 'GO:0015031']	6
Contig009168	['GO:0006171', 'GO:0007186', 'GO:1900016', 'GO:0071285', 'GO:0007190', 'GO:0001818', 'GO:0002819', 'GO:0060135', 'GO:0035556', 'GO:0007189', 'GO:0071361', 'GO:0009190']	5
Contig002911	['GO:0016310']	1
Contig011321	['GO:0006396', 'GO:0006397', 'GO:0051301', 'GO:0000390', 'GO:0008380', 'GO:0007275', 'GO:0000398', 'GO:0060215', 'GO:0010467', 'GO:0048856', 'GO:0070054']	8
Contig009485	['GO:1902004', 'GO:0051965', 'GO:0051963', 'GO:1905606', 'GO:0099054']	1
Contig000452	['GO:0016477', 'GO:0007420', 'GO:0035082', 'GO:0060041', 'GO:0022008', 'GO:0021860', 'GO:0043010', 'GO:0035556', 'GO:0060271', 'GO:0048813', 'GO:0001654', 'GO:0021766', 'GO:0021952', 'GO:0001764', 'GO:0048675', 'GO:0001578', 'GO:0042461', 'GO:0021819', 'GO:0030182']	9
Contig002800	['GO:0097237', 'GO:0098754']	0
Contig013750	['GO:0002181', 'GO:0071493', 'GO:0000463', 'GO:0010467', 'GO:0140242', 'GO:0006412', 'GO:0140236']	2
Contig013894	['GO:0006629', 'GO:0070613', 'GO:0030317', 'GO:0005975', 'GO:0051179', 'GO:0039023', 'GO:1901615', '', 'GO:0046856', 'GO:0006066', 'GO:0032402', 'GO:0071871', 'GO:0060271', 'GO:0019637', 'GO:0016311', 'GO:0070121', 'GO:0007283', 'GO:0001701']	8
Contig003316	['GO:0060078', 'GO:0042391', 'GO:0035725', 'GO:0034220', 'GO:0006813', 'GO:0035249', 'GO:0050804', 'GO:0006811', 'GO:0035235', 'GO:0007268']	8
Contig008685	['GO:0006888', 'GO:0048280']	2
Contig003170	['GO:0051028', 'GO:0015031', 'GO:0042306', 'GO:0006913', 'GO:0046907']	4
Contig009396	['GO:2000353', 'GO:0043154', 'GO:0003417', 'GO:0018149', 'GO:0043536', 'GO:0042327', 'GO:2001027', 'GO:0002581', 'GO:0045727', 'GO:0032570', 'GO:0043406', 'GO:0010748', 'GO:0071363', 'GO:0050878', 'GO:0010757', 'GO:0006986', 'GO:0040037', 'GO:0048856', 'GO:0045766', 'GO:2000379', 'GO:0010763', 'GO:0070487', 'GO:0032026', 'GO:0010759', 'GO:0032695', 'GO:0008285', 'GO:0008284', 'GO:0048266', 'GO:00…	21
Contig012726	['GO:0006629', 'GO:0042632', 'GO:0007586', 'GO:0006699', 'GO:0008203', 'GO:0006707', 'GO:0008202', 'GO:0006694', 'GO:1901615', 'GO:0030573', 'GO:0016042']	8
Contig013888	['GO:0050908', 'GO:0007267', 'GO:0009416', 'GO:0007276', 'GO:0007416', 'GO:0055085']	5
Contig010720	['GO:0048513', 'GO:0007186', 'GO:0006629', 'GO:0044255', 'GO:0046339', 'GO:0016310', 'GO:0007200', 'GO:0048468', 'GO:0035556', 'GO:0046834', 'GO:0046486']	8
Contig000630	[]	0
Contig005695	['GO:0006355', 'GO:0006357', 'GO:0010468', '']	3
Contig007605	['GO:0006656', 'GO:0006629', 'GO:0006657', 'GO:0008654', 'GO:0044255', 'GO:0001541', 'GO:0007283', 'GO:0008610', 'GO:0009058']	8
Contig009463	['GO:1902603', 'GO:0015881', 'GO:0046415', 'GO:0015718', 'GO:0055085']	2
Contig004762	['GO:0045892', '', 'GO:0006338', 'GO:1904197', 'GO:0042659', 'GO:0000122', 'GO:2000736', 'GO:0008284', 'GO:0010971', 'GO:0060215', 'GO:0045893', 'GO:0006476', 'GO:0000086', 'GO:1990739', 'GO:0006355', 'GO:0008283']	7
Contig014711	['GO:0046963', 'GO:1902559', 'GO:0051179', 'GO:0015012', 'GO:0055085']	3
Contig003500	['GO:0007216', 'GO:0007186', 'GO:0007193', 'GO:0051966', 'GO:0023052', 'GO:0050896', 'GO:0007196', 'GO:0007601']	6
Contig002057	['GO:0010468', 'GO:0060261', 'GO:0032968', 'GO:0008152', 'GO:0016567', 'GO:0051123', 'GO:0045893', 'GO:0006366', 'GO:0006351', 'GO:0006357', 'GO:0043170', 'GO:0035914']	9
Contig010852	['GO:0007507', 'GO:2000045', 'GO:0045597', 'GO:0010971', 'GO:0045663', 'GO:0055007', 'GO:0006351', 'GO:0002052', 'GO:0022008', 'GO:0006337', 'GO:2000781', 'GO:0007389', 'GO:0003219', 'GO:0043010', 'GO:0050769', 'GO:2000819', 'GO:0007399', 'GO:0042692', 'GO:0016043', 'GO:0006338', 'GO:0042127', 'GO:0034728', 'GO:0045595', 'GO:2000179', 'GO:0045893', 'GO:0030071', 'GO:0051152', 'GO:0045582', 'GO:00…	13
Contig010858	['GO:0008593', 'GO:0016310', 'GO:0030500', 'GO:0006468', 'GO:0006351', 'GO:0006357', 'GO:0050790', 'GO:0048259', 'GO:0045747', 'GO:2000369']	3
Contig003962	['GO:0048812', 'GO:0016310', 'GO:0006468', 'GO:0030036', 'GO:0046330', 'GO:0072659', 'GO:0048814', 'GO:0008360', 'GO:0030033', 'GO:0007369', 'GO:0000165', 'GO:0035556', 'GO:0050793', 'GO:0007399', 'GO:0016055', 'GO:0098696', '', 'GO:0043408', 'GO:0001934', 'GO:0060027', 'GO:0007010', 'GO:0046777', 'GO:0030182']	15
Contig001458	['GO:1905686', 'GO:0043484', 'GO:0010468', 'GO:0051924', 'GO:1901385', 'GO:0034765']	4
Contig004308	['GO:0006915', 'GO:0072114', 'GO:0097194']	2
Contig001407	['GO:0050878', 'GO:0048264', 'GO:0001568', 'GO:0030513', 'GO:0036342', 'GO:0035124', 'GO:0001885', 'GO:0010467', 'GO:0009953', 'GO:0016485', 'GO:0001707', 'GO:0006897', 'GO:0035162', 'GO:0006508']	4
Contig000559	['GO:0008286', 'GO:0044237', 'GO:0009812', 'GO:0005975', '', 'GO:1901615', 'GO:0001666', 'GO:0006687', 'GO:1901135', 'GO:0009410', 'GO:1901733', 'GO:0010040', 'GO:0006672', 'GO:0009651', 'GO:2000892', 'GO:0050793', 'GO:0042440', 'GO:0005990', 'GO:0008543', 'GO:0030149', 'GO:0008152', 'GO:0010045', 'GO:0005975', 'GO:0010288', '', '', 'GO:0009311', 'GO:0046477', 'GO:0045471', 'GO:0046514', 'GO:0007…	10
Contig012201	['GO:0007010']	1
Contig002361	['GO:0042147']	1
Contig012907	['GO:0048255', 'GO:0001829']	1
Contig014584	['GO:0006357', 'GO:0000122', 'GO:0045944']	3
Contig000406	['GO:0045892', 'GO:0030178', 'GO:0035329', 'GO:0030308', 'GO:0060044', 'GO:0035331', 'GO:0006355', 'GO:0045732']	5
Contig008189	['GO:0007029', 'GO:0008104', 'GO:0051641']	2
Contig002165	['GO:0016192', 'GO:0090630', 'GO:0043547', 'GO:0003094']	2
Contig013254	['GO:0070373', 'GO:0007010', 'GO:0016567', 'GO:0007020', 'GO:0065003', 'GO:0007166', 'GO:1902993']	4
Contig006523	['GO:0007507', 'GO:0006936', 'GO:0001570', 'GO:0086021', 'GO:0007043', 'GO:0086053', 'GO:0007267', 'GO:0034220', 'GO:0086014', 'GO:0016264', 'GO:0048468', 'GO:0048738', 'GO:0055085', 'GO:0007601', 'GO:0007268']	9
Contig000121	['GO:0070509', 'GO:0097324', 'GO:0006814', 'GO:0035725', 'GO:0006874', 'GO:0070588', 'GO:0042438', 'GO:0050896', 'GO:0055085', 'GO:0006816', 'GO:0006813', 'GO:0048022', 'GO:0006811', 'GO:0071805', 'GO:0098656', 'GO:0043473', 'GO:0034220', 'GO:0048066', 'GO:0030318']	9
Contig012153	['GO:0007512', 'GO:0006814', 'GO:0060731', 'GO:0048608', 'GO:1900749', 'GO:0051649', 'GO:0034341', 'GO:0009609', 'GO:0150104', 'GO:0055085', 'GO:0015697', 'GO:0071705', 'GO:0015695', 'GO:1902270', 'GO:0009437', 'GO:0045087', 'GO:0006811', 'GO:0034097', 'GO:0015879', 'GO:0070715', 'GO:0007626', 'GO:1902603', 'GO:0034220', 'GO:1990961', 'GO:0009617', 'GO:0034612', 'GO:0007005']	9
Contig004605	['GO:0010951']	0
Contig002713	['GO:0048812', 'GO:0016477', 'GO:0016310', 'GO:0060721', 'GO:0006468', 'GO:0030036', 'GO:0046330', 'GO:0007567', 'GO:0098586', 'GO:0000165', 'GO:0035556', 'GO:0006355', 'GO:0043408', 'GO:0043542', 'GO:0036303', 'GO:0098792', 'GO:0008285', 'GO:1904977', 'GO:0006914']	11
Contig011228	['GO:0045892', 'GO:0000122', 'GO:0006355', 'GO:0006357', 'GO:0030154']	4
Contig015353	['GO:0009408', 'GO:0008104', 'GO:0007030', 'GO:0009987', 'GO:0006606', 'GO:0015031', 'GO:0006913', 'GO:0034605', 'GO:0030324', 'GO:0046907']	8
Contig011365	['GO:0001737', 'GO:0021794', 'GO:0007480', 'GO:0035332', 'GO:0048729', 'GO:0007560', 'GO:0007476', 'GO:0045317', 'GO:0030010', 'GO:0090175', 'GO:0098609', 'GO:0035556', 'GO:0003382', 'GO:0061386', 'GO:0048731', 'GO:0048513', 'GO:0000902', 'GO:0035329', 'GO:0030154', 'GO:0051491', 'GO:0050878', 'GO:0009888', 'GO:0007440', 'GO:0016318', 'GO:0044331', 'GO:0000902', 'GO:0007015', 'GO:0009653', 'GO:00…	20
Contig006550	['GO:0007188', 'GO:0007186', 'GO:0008284', 'GO:0048662', 'GO:0007267', 'GO:0009653', 'GO:0007190', 'GO:0007187', 'GO:0048731', 'GO:0007166']	7
Contig013397	['GO:0061024', 'GO:0007507', 'GO:0046716', 'GO:0060047', 'GO:0009888', 'GO:0055001', 'GO:0048738']	3
Contig012066	['GO:0007507', 'GO:0001568', 'GO:0009653', 'GO:0005975', 'GO:0003279', 'GO:0008283', 'GO:0015012', 'GO:0030166', 'GO:0030900', 'GO:0015014', 'GO:0060976', 'GO:0051923', 'GO:0030210', 'GO:0008543', 'GO:0001570', 'GO:0030203', 'GO:0009887', 'GO:0006954', 'GO:0006477', 'GO:0008152', 'GO:0035904', 'GO:0045880', 'GO:0006476', 'GO:0043410', 'GO:0048703', 'GO:1904888', 'GO:0048702', 'GO:0007585', 'GO:00…	13
Contig008386	['GO:0007417', 'GO:0030855', 'GO:0006417', 'GO:0007399', 'GO:0010468', 'GO:0009725']	4
Contig014231	['GO:0032543', 'GO:0006412', 'GO:0010467']	2
Contig004504	[]	0
Contig002557	['GO:0051592', 'GO:0006874', 'GO:0014009', 'GO:0030855', 'GO:0008283', 'GO:0014070', 'GO:0048856', 'GO:0009651', 'GO:0010629', 'GO:0007599', 'GO:0061025', 'GO:0009992', 'GO:0030154', 'GO:0006914', 'GO:0008360', 'GO:0032024']	11
Contig011066	['GO:0030707', 'GO:0008584', 'GO:0006351', 'GO:1901836', '', 'GO:0036098', 'GO:0045945', 'GO:0042254', 'GO:0045893', 'GO:0032869', 'GO:1901838', 'GO:0006364', '', 'GO:0010467', 'GO:2000738', 'GO:0007281', 'GO:0090070', 'GO:0033140', 'GO:0010468', 'GO:0030723', 'GO:0045943']	7
Contig007359	['GO:0006396', 'GO:0016070', 'GO:0042780', 'GO:0090646', 'GO:0001966', 'GO:0006396', 'GO:0001654', 'GO:0010467', 'GO:0007632', 'GO:1990180', 'GO:0001680', 'GO:0008152', 'GO:0008033']	8
Contig015177	['GO:0009306', 'GO:0016192', 'GO:0008104']	2
Contig014520	['GO:0006936', 'GO:0044057', 'GO:0003009', 'GO:0045893', 'GO:0030239', 'GO:0060048', 'GO:0006937']	3
Contig000643	['GO:0015914', 'GO:0120009']	2
Contig006658	['GO:0007420', 'GO:0050808', 'GO:0035331', 'GO:0035176', 'GO:0009410', 'GO:0007612', 'GO:0035640', 'GO:0007613', 'GO:0071625', 'GO:0099562', 'GO:0060292', 'GO:0007416', 'GO:0051968', 'GO:0008306', 'GO:0008284', 'GO:0008344', 'GO:0060291', 'GO:0030534', 'GO:0007584', 'GO:0099175']	5
Contig010626	['GO:0022408', 'GO:0002376', 'GO:0042130', 'GO:0042127', 'GO:0042129', 'GO:0045590', 'GO:0006974', 'GO:0043065', 'GO:0050777', 'GO:0045595', 'GO:0006955', 'GO:0050852', 'GO:0002250', 'GO:0030889', 'GO:0050853']	10
Contig009865	[]	0
Contig014594	['GO:0050790', 'GO:0043087', 'GO:0006914']	1
Contig001900	['GO:0018108', 'GO:0070266', 'GO:0051260', 'GO:0016310', 'GO:0007166', 'GO:0097527', 'GO:0070207', 'GO:0006468', 'GO:0012501', 'GO:0051607', 'GO:0097528']	6
Contig000887	[]	0
Contig000546	[]	0
Contig002295	['GO:0051926', 'GO:0007010', 'GO:0019222', 'GO:0051044', 'GO:0016310', 'GO:0097320', 'GO:0030100', 'GO:0060034', 'GO:0045806', 'GO:0051924', 'GO:0014028', 'GO:0006897', 'GO:0045732']	7
Contig015170	['GO:0006869', 'GO:0032355', 'GO:0071391']	1
Contig015282	['GO:0043161', 'GO:0030970', 'GO:0050687', 'GO:0046907', 'GO:1901698', 'GO:0034976', 'GO:0036503', '', 'GO:0039536', 'GO:0008104', 'GO:0009968', 'GO:0001818', 'GO:0010629', 'GO:0039535', 'GO:0030163', 'GO:0007030', 'GO:0006511', 'GO:0032480', 'GO:0006508']	11
Contig005390	['GO:0032259', 'GO:0048856', 'GO:0009117']	2
Contig014091	['GO:0009408', 'GO:0007525', 'GO:0006457', 'GO:0006986', 'GO:0042026', 'GO:0050790']	3
Contig009939	['GO:1902916', 'GO:0043161', 'GO:0042752', 'GO:0016567', 'GO:0035556', 'GO:0006511', 'GO:0031398', 'GO:0048511', 'GO:0006508']	5
Contig008688	[]	0
Contig007868	['GO:0099590', 'GO:0042073', 'GO:0060082', 'GO:0051899', 'GO:0051592', 'GO:0051966', 'GO:0098962', 'GO:1902908', 'GO:0070588', 'GO:2000969', 'GO:0034765', 'GO:0046907', 'GO:0007224', 'GO:0098943', 'GO:0099072', 'GO:0006816', 'GO:0099645', 'GO:1904510', 'GO:0035556', 'GO:0031623', 'GO:0007264', 'GO:0006355', 'GO:0006897', 'GO:0006886', 'GO:0006811', 'GO:0060271', 'GO:0048513', 'GO:0008104', 'GO:00…	21
Contig002436	['GO:0022414', 'GO:0001893', 'GO:0010628', 'GO:0048144', 'GO:0007283', 'GO:0048026', 'GO:0030154']	4
Contig009746	['GO:0007186', 'GO:0051966', 'GO:0051179', 'GO:0050896', 'GO:0014059', 'GO:0007216', 'GO:0046928', 'GO:0007194', 'GO:1901698', 'GO:0007213', 'GO:0099171', 'GO:0099536', 'GO:0090461', 'GO:2001023', 'GO:0007196', 'GO:0007268', 'GO:0007193', 'GO:0051896', 'GO:0014048', 'GO:0007267', 'GO:0060292', 'GO:0043170', 'GO:0042220', 'GO:0006302', 'GO:0014047', 'GO:0023052', '', 'GO:0010467', 'GO:0043113', 'G…	12
Contig009165	['GO:0046890', 'GO:0006629', 'GO:0008104', 'GO:0019222', '', 'GO:0034504', 'GO:0010867', 'GO:0051641']	3
Contig015623	['GO:0048148', 'GO:0061024', 'GO:0031115', 'GO:0043154', 'GO:0001963', 'GO:0050729', 'GO:0050808', 'GO:0014059', 'GO:0045921', 'GO:0044344', 'GO:0048168', 'GO:0042775', 'GO:0051259', 'GO:0007268', 'GO:0043524', 'GO:0043065', 'GO:0048488', 'GO:1904307', 'GO:0001921', 'GO:1903421', 'GO:0016079', 'GO:0031648', 'GO:0045807', 'GO:0051279', 'GO:0051585', 'GO:0051928', 'GO:0043549', 'GO:0045963', 'GO:00…	30
Contig000110	['GO:0007015', 'GO:0006936', 'GO:0048821', 'GO:0030218', 'GO:0030036', 'GO:0030239', 'GO:0051694', 'GO:1901992', 'GO:0098609', 'GO:0051693', 'GO:0032956', 'GO:0044772']	8
Contig014312	['GO:0007059', 'GO:0000278', 'GO:0000132', 'GO:0045839', 'GO:0036090', 'GO:0048193', 'GO:0007094', 'GO:0065003', 'GO:0007080', 'GO:0045786', 'GO:0006890', 'GO:0035556', 'GO:0007096', 'GO:0007112', 'GO:0006888', 'GO:0008104', 'GO:0007049', 'GO:0034501', 'GO:0016192', 'GO:0009987', 'GO:0000070', 'GO:0051321', 'GO:0051726', 'GO:0007107', 'GO:0051988', 'GO:0051301', 'GO:0006996', 'GO:0007030', 'GO:00…	16
Contig005342	['GO:0023019', 'GO:0007507', 'GO:0009653', 'GO:0001708', 'GO:0036342', 'GO:0055007', 'GO:0045944', 'GO:0014028', 'GO:0008283', 'GO:0007509', 'GO:0061371', 'GO:0043009', 'GO:0061053', 'GO:0007369', 'GO:0044344', 'GO:0001756', 'GO:0060395', 'GO:0060379', 'GO:0006355', 'GO:0009952', 'GO:0071300', 'GO:0048513', 'GO:0007341', 'GO:0001570', 'GO:0030903', 'GO:0000578', 'GO:0045893', 'GO:0045165', 'GO:00…	16
Contig015632	['GO:0006629', 'GO:0006633', 'GO:0006693', 'GO:0006749', 'GO:0007626', 'GO:0001516', 'GO:2000255', 'GO:0006631']	7
Contig014070	['GO:0005975', 'GO:0046373', 'GO:0032474', 'GO:0019321', 'GO:0048752', 'GO:0007605']	3
Contig008860	['GO:0031642', 'GO:0031175', 'GO:0070374', 'GO:0060341', 'GO:0070373', 'GO:0042552', 'GO:0010719', 'GO:0035556', 'GO:2000134', 'GO:1903860', 'GO:0090071', 'GO:0007613', 'GO:0043065', 'GO:0031398', 'GO:0051726', 'GO:0022414', 'GO:0042711', 'GO:2001235', 'GO:0009888', 'GO:0051898', 'GO:0050821', 'GO:0045475', 'GO:1901017', 'GO:0048008', 'GO:0019953', 'GO:2000463', 'GO:0048812', 'GO:0002902', 'GO:00…	31
Contig013659	['GO:1900376', 'GO:0071467', 'GO:1900198', 'GO:0030335', 'GO:0097264', 'GO:0015031', 'GO:0010632', 'GO:0010634', 'GO:0042318', 'GO:0006508']	4
Contig002569	['GO:0007000', 'GO:0000278', 'GO:0033979', 'GO:0008152', 'GO:0014032', 'GO:0016070', 'GO:0006970', 'GO:0048762', 'GO:0014029', 'GO:0048167', 'GO:0006417', 'GO:0045893', 'GO:0042306', 'GO:0006364', 'GO:0008284', 'GO:1904888', 'GO:0007409', 'GO:0048701', 'GO:0010468']	10
Contig006684	[]	0
Contig000126	['GO:0007507', 'GO:0009653', 'GO:0005975', 'GO:0043549', 'GO:0034199', 'GO:0009966', 'GO:1903444', 'GO:0010737', 'GO:0035582', 'GO:0045671', 'GO:0033627', 'GO:0048050', 'GO:0032100', 'GO:0032095', 'GO:0043010', 'GO:0048048', 'GO:1990314', 'GO:0031667', 'GO:0035556', 'GO:0048731', 'GO:0007155', 'GO:2001204', 'GO:0048513', 'GO:0008104', 'GO:0045595', 'GO:0046676', 'GO:0048468', 'GO:0030514', 'GO:00…	13
Contig011123	[]	0
Contig002545	['GO:0000082', 'GO:0016310', 'GO:0014733', 'GO:0006816', 'GO:0030154', 'GO:0006468', 'GO:0010975', 'GO:0046777', 'GO:0035556', 'GO:0007399', 'GO:1901897', 'GO:0051924', 'GO:0001666', 'GO:0030073']	8
Contig002013	['GO:0090280', 'GO:0007204', 'GO:0007186', 'GO:0046718', 'GO:0042127', 'GO:0045907', 'GO:0043434', 'GO:0043270', '', '', 'GO:0032430', 'GO:0001992', 'GO:0043410', 'GO:0150104', 'GO:0090238', 'GO:0008217', 'GO:0060732']	6
Contig015702	[]	0
Contig002171	['GO:0006629', 'GO:0046856', 'GO:0046716', 'GO:0008333', 'GO:0060304', 'GO:0006661', 'GO:0016311', 'GO:0048311', 'GO:0045109', 'GO:0044088']	3
Contig009680	['GO:0007155', 'GO:0043009', 'GO:0098609']	2
Contig009846	['GO:0006508']	1
Contig009406	['GO:0006629', 'GO:0006633', 'GO:0033993', 'GO:0006636', 'GO:0070542', 'GO:0016053', 'GO:0008610', 'GO:1903966', 'GO:0006631']	6
Contig015231	['GO:0006261', 'GO:0098869', 'GO:0048568', 'GO:1903460', 'GO:0006281', 'GO:0000278', 'GO:0090592', 'GO:0006468', 'GO:0034080', 'GO:0006289', 'GO:0007064', 'GO:0045004', 'GO:0071897', 'GO:0006297', 'GO:0006284', 'GO:0140529', 'GO:0000082', 'GO:0006974', 'GO:0006139', 'GO:0033314', 'GO:0006260', 'GO:0000413', 'GO:1902983', 'GO:0090304', 'GO:0061806', 'GO:0000731', 'GO:0006303', 'GO:0048579', 'GO:00…	22
Contig003888	['GO:0006895', 'GO:0043161', 'GO:1990390']	2
Contig005412	['GO:0006513', 'GO:0070534', 'GO:0070936', 'GO:0032446', 'GO:0006974', 'GO:0000209', 'GO:0051865', 'GO:0006281', 'GO:0016567', 'GO:0070979', 'GO:0044314', 'GO:0085020', 'GO:0035519']	5
Contig012883	['GO:0006082', 'GO:0016070', 'GO:0032543', 'GO:0010467', 'GO:0006412', 'GO:0008152', 'GO:0070681']	4
Contig015020	[]	0
Contig007104	['GO:0008593', 'GO:0006281', 'GO:0007420', 'GO:0048193', 'GO:0009653', 'GO:0043087', 'GO:0001525', 'GO:0006974', 'GO:0000916', 'GO:0051216', 'GO:0006974', 'GO:0007275', 'GO:0006891', 'GO:0009651', 'GO:0007112', 'GO:0000002', 'GO:0007110', 'GO:0048513', 'GO:0032259', 'GO:0030903', 'GO:0009987', 'GO:0001558', 'GO:0048137', 'GO:0007166', 'GO:1990748', 'GO:0000723', 'GO:0006310', 'GO:0001501', 'GO:00…	14
Contig010883	['GO:0000398', 'GO:0045944', 'GO:0065003', 'GO:0000244', 'GO:0019222', 'GO:0008380', 'GO:1903798', 'GO:0006396', 'GO:0006397', 'GO:0000375', 'GO:0010628', 'GO:1903800', 'GO:2000630', 'GO:0031507', 'GO:0010629', 'GO:0006403', 'GO:0000245', 'GO:0031047', 'GO:0010467', 'GO:0006346']	13
Contig009768	['GO:0006469']	0
Contig000410	['GO:0043407', 'GO:0045923', 'GO:0030855', 'GO:0150079', 'GO:0071404', 'GO:1905461', 'GO:0019216', 'GO:0045892', 'GO:0031100', 'GO:0015909', 'GO:0071285', 'GO:0050673', 'GO:0010742', 'GO:0043065', 'GO:1901558', 'GO:0030509', 'GO:0032868', 'GO:0045893', 'GO:0031000', 'GO:0031394', 'GO:0042593', 'GO:0030154', 'GO:0006950', 'GO:1903076', 'GO:0042789', 'GO:0042594', 'GO:0001890', 'GO:0008217', 'GO:00…	34
Contig012580	['GO:0006357', '', 'GO:0045893', '', 'GO:1990830', 'GO:0045944', 'GO:0006355']	3
Contig004201	['GO:0006751', 'GO:0006749', 'GO:0043171', '']	2
Contig012469	['GO:0008645', 'GO:0008643', 'GO:0015749', 'GO:0055085']	2
Contig010655	['GO:0006511', 'GO:0039021', 'GO:0016579', 'GO:0031647', 'GO:0006508']	2
Contig008163	['GO:0009435', 'GO:0009165', 'GO:0009058', 'GO:0019363', 'GO:0008152']	5
Contig011764	['GO:0007155', 'GO:0050901', 'GO:0016477']	2
Contig005637	[]	0
Contig010434	['GO:0007204', 'GO:0007186', 'GO:0007200', 'GO:0031334']	3
Contig015654	[]	0
Contig005900	['GO:0007155', 'GO:0007156', 'GO:0098609']	3
Contig008652	['GO:0022414', 'GO:0030317', 'GO:0007018']	2
Contig006943	['GO:1902570', 'GO:0030154', 'GO:0007399']	2
Contig004470	['GO:0007186', '', 'GO:0006783', 'GO:0017015', 'GO:0030111', '', 'GO:0045892', 'GO:0007219', 'GO:0007275', 'GO:0060623', 'GO:0015995', 'GO:0035220', 'GO:0006412', 'GO:0016055', 'GO:0048513', 'GO:0030879', 'GO:0045893', 'GO:0060021', 'GO:0051726', 'GO:0030154', 'GO:0022414', 'GO:0007076', 'GO:0009888', 'GO:0060429', 'GO:0060828', 'GO:0007420', 'GO:0048856', 'GO:0009966', 'GO:0033601', 'GO:0007405'…	29
Contig004289	['GO:0046210', 'GO:0032770', 'GO:0043154', 'GO:0009812', 'GO:0060192', 'GO:0019344', 'GO:0008610', 'GO:0000103', 'GO:0051353', 'GO:0090031', 'GO:0019538', 'GO:0043066', 'GO:0009725', 'GO:0090181', 'GO:0090346', 'GO:0009410', 'GO:0019395', 'GO:0070988', 'GO:0009437', 'GO:0071371', 'GO:0071372', 'GO:0044255', 'GO:0042981', 'GO:0045880', 'GO:0022900', 'GO:0071548', 'GO:0032332', 'GO:0045542', 'GO:00…	9
Contig014477	['GO:0044779', 'GO:0000278', 'GO:0044818', 'GO:0051447', 'GO:0045786', 'GO:0000209', 'GO:0016567', 'GO:0035556', 'GO:0010564', 'GO:0007049', 'GO:0032436', 'GO:0031398', 'GO:0051321', 'GO:0051726', 'GO:0022414', 'GO:0045930', 'GO:0051301', 'GO:0019941', 'GO:0031648', 'GO:0006511', 'GO:0010389', 'GO:0006508']	12
Contig001655	['GO:0030218', '', 'GO:0000122', 'GO:0030854', 'GO:0045944', 'GO:1903706', 'GO:0045646', 'GO:0006325', 'GO:0030099', '', 'GO:0006355', 'GO:0030097', 'GO:0060216', 'GO:0006357', '']	6
Contig006698	['GO:0006629', 'GO:0055091', 'GO:0034219', 'GO:0042632', 'GO:0015721', 'GO:0015722', 'GO:0006979', 'GO:0006869', 'GO:0014070', 'GO:0055088', 'GO:0019216', 'GO:1901615', 'GO:0055085', 'GO:0009410', 'GO:0008206', 'GO:0071466', 'GO:0120188', 'GO:0016567', 'GO:1904251', 'GO:0032782', 'GO:0006805', 'GO:0031998', 'GO:0038183', 'GO:0006855', 'GO:0043627', 'GO:0045471', 'GO:0120189', 'GO:0043627', 'GO:00…	15
Contig011860	['GO:0001675', 'GO:0051301', 'GO:0008104', 'GO:0007049', 'GO:0034501', 'GO:0007059', 'GO:0051641', 'GO:0008608']	3
Contig005961	[]	0
Contig009866	['GO:0006814', 'GO:0060047', 'GO:1902600', 'GO:1990573', 'GO:0071260', 'GO:0086002', 'GO:0035725', 'GO:0031947', 'GO:0045823', 'GO:0086064', 'GO:0036376', 'GO:0055085', 'GO:0009410', 'GO:0086013', 'GO:0006813', 'GO:1903416', 'GO:0045989', 'GO:0006811', 'GO:0086004', 'GO:0086009', 'GO:0002026', 'GO:0071805', 'GO:0030007', 'GO:0045822', 'GO:0008016', 'GO:0055119', 'GO:0034220', 'GO:0071383', 'GO:00…	12
Contig007475	['GO:0072015', 'GO:0030866', 'GO:0016477', 'GO:0031106', 'GO:0000278', 'GO:0001667', 'GO:0032185', 'GO:0007275', 'GO:1904172', 'GO:0008356', 'GO:0007096', 'GO:0003094', 'GO:0048513', 'GO:0007049', 'GO:0030036', 'GO:0002244', 'GO:0000915', 'GO:0031032', 'GO:0030154', 'GO:0032836', 'GO:0051301', 'GO:0007010', 'GO:0032506', 'GO:0061640', 'GO:0000921', 'GO:0000281', 'GO:0090521', 'GO:0060491']	9
Contig005019	['GO:2000096', 'GO:0007507', 'GO:0090090', 'GO:0001702', 'GO:0030178', 'GO:0048264', 'GO:0046330', 'GO:0042074', 'GO:0009953', 'GO:0043410']	5
Contig003552	[]	0
Contig015038	['GO:0048477', 'GO:0030154']	2
Contig002702	['GO:0007507', 'GO:0018230', 'GO:0018345', 'GO:0006974', 'GO:0006612', 'GO:0030900', 'GO:0006915', 'GO:0021537', 'GO:0001654']	6
Contig001494	['GO:0090304', 'GO:0098038', 'GO:0008152', 'GO:0032196']	3
Contig007499	['GO:0042157', 'GO:0048193', 'GO:0045773', 'GO:0016192', 'GO:0006606', 'GO:0048280', 'GO:0048856', 'GO:0006869', 'GO:0016043', 'GO:0043001', 'GO:0030154', 'GO:0006886']	9
Contig011210	['GO:0009410', 'GO:0001501', 'GO:0043627', 'GO:0006915', '', 'GO:0046685', 'GO:0030198', 'GO:0042489', 'GO:0007584', 'GO:0045671', 'GO:0045779', 'GO:0032026']	3
Contig009841	['GO:0007611', 'GO:0007186', 'GO:0061098', 'GO:0051966', 'GO:0050890', 'GO:0050808', 'GO:0006448', 'GO:0001932', 'GO:0006468', 'GO:0007206', 'GO:0090394', '', 'GO:0050896', 'GO:0034765', 'GO:0007216', 'GO:0060078', '', 'GO:1901698', 'GO:0048170', 'GO:0099566', 'GO:0099170', 'GO:0035556', 'GO:0007612', 'GO:0048169', 'GO:0019722', 'GO:0099536', 'GO:1904646', 'GO:0006355', 'GO:0007196', 'GO:0007268'…	18
Contig003768	[]	0
Contig011666	['GO:2001235', 'GO:0006974', 'GO:0043065', 'GO:0071260', 'GO:0000077', 'GO:0042981', 'GO:0006915', 'GO:0000278', 'GO:0008625', 'GO:0006977', 'GO:0097190', 'GO:0006919', 'GO:0051726']	8
Contig005454	['GO:0002376', 'GO:0002224', 'GO:0031663', 'GO:0001775', 'GO:0071222', 'GO:0009617', 'GO:0042100', 'GO:0008283', 'GO:0002322', 'GO:0035025', 'GO:0032496', 'GO:0006955', 'GO:0009966', 'GO:0006954', 'GO:0031666', 'GO:0045087', 'GO:0051607']	10
Contig015303	['GO:0048227', 'GO:0007030', 'GO:0035526', 'GO:1903358', 'GO:0090630', 'GO:0019068', 'GO:0043547']	3
Contig004938	['GO:0003401', 'GO:0008652', 'GO:0048856', 'GO:0019344', 'GO:0043506', 'GO:0021587', 'GO:0043066', 'GO:0070814', 'GO:0008152', 'GO:0007275', 'GO:0043418', 'GO:0050667', 'GO:0019448', 'GO:0060135', 'GO:0031667', 'GO:0019343', 'GO:0019346', 'GO:0006565', 'GO:0097746', 'GO:0006790', 'GO:0008152', 'GO:0060351', 'GO:0051593', 'GO:0006563', 'GO:0006535', 'GO:0001974', 'GO:0042262', 'GO:0022414', 'GO:00…	11
Contig014236	['GO:0006629', 'GO:0035336', 'GO:1901568', 'GO:0009058', 'GO:0010025', '', 'GO:0008152']	4
Contig010909	['GO:0006357', 'GO:0022414', 'GO:0042127', 'GO:0045595', 'GO:0000122', 'GO:0007283', 'GO:0006355', 'GO:0006366', 'GO:0030154']	8
Contig007064	['GO:0006974', 'GO:0043065', 'GO:0006281', 'GO:0000338', 'GO:0016926', 'GO:0090304', 'GO:0006508']	4
Contig010259	['GO:0006334', 'GO:0071364', 'GO:0045944', 'GO:0043066', 'GO:0065003', 'GO:0032760', 'GO:0001525', 'GO:2000232', 'GO:1990830', 'GO:0006897', 'GO:0046627', 'GO:0097010', 'GO:0071222', 'GO:0010628', 'GO:0048026', 'GO:0017148', 'GO:1901838', 'GO:0032755', 'GO:0010467', 'GO:0001731', 'GO:0050730']	10
Contig013526	['GO:0060325', 'GO:0030036', 'GO:0008306', 'GO:0001824']	2
Contig008807	['GO:0006511', 'GO:0043161', 'GO:0006508']	3
Contig014721	['GO:0033601', 'GO:0045944', 'GO:0022604', 'GO:0045892', 'GO:0090303', 'GO:2000394', 'GO:0006355', 'GO:0030155', 'GO:1900026', 'GO:1903691', 'GO:0030335', 'GO:0042127', 'GO:0045595', 'GO:0045893', 'GO:0050679', 'GO:0006354', 'GO:0000122', 'GO:0090336', 'GO:0006357', 'GO:0006366', 'GO:0010634']	10
Contig006444	['GO:0006486', 'GO:0006487', 'GO:0018242']	2
Contig007122	['GO:0007178', 'GO:0006511', 'GO:0043161', 'GO:0032091', 'GO:0006281', 'GO:0034605', 'GO:0045862', 'GO:0006974', 'GO:0000209', 'GO:0002931', 'GO:0016567', 'GO:0051604', 'GO:0061684', 'GO:0045732', 'GO:0031647', 'GO:0036503', 'GO:0051443', '', 'GO:2000060', 'GO:0032436', 'GO:0006457', 'GO:0031398', 'GO:0071218', 'GO:0030512', 'GO:0070534', 'GO:0006508', 'GO:0090035', 'GO:0051865', 'GO:0071456', 'G…	14
Contig011925	['GO:0007059', 'GO:2000816', 'GO:0006281', 'GO:0007064', 'GO:0010965', 'GO:0033045', 'GO:0006974', 'GO:0045786', 'GO:0010951', 'GO:0010948', 'GO:0007049', 'GO:0051276', 'GO:0001558', 'GO:0051726', 'GO:0022414', 'GO:0008285', 'GO:0045143', 'GO:2001251', 'GO:0051301', 'GO:0007283']	11
Contig006434	['GO:0006513', 'GO:0070534', 'GO:0030513', 'GO:0000209', 'GO:0006281', 'GO:0043161', 'GO:0016197', 'GO:0006301', 'GO:0016567', 'GO:0010951', 'GO:0006413', 'GO:0043066', 'GO:0042147', '']	8
Contig013237	['GO:0070848', 'GO:0031344', 'GO:1902018', 'GO:1902017', 'GO:0046676', 'GO:0042593', 'GO:0032007', 'GO:0090630', 'GO:0043087', 'GO:0031398', 'GO:0050790', 'GO:0043547']	3
Contig001975	['GO:0016558', 'GO:0009798', '', 'GO:0006605', 'GO:0007031', 'GO:0019538', 'GO:0060528', 'GO:0048599', 'GO:0043170', '', 'GO:0008104', 'GO:0006356', 'GO:0045893', 'GO:0048026', 'GO:0060770', 'GO:0006364', 'GO:0008285', 'GO:0022414', 'GO:0008284', 'GO:0060767', 'GO:0010467', 'GO:0007281', 'GO:0048469', 'GO:0007309', 'GO:0006357', 'GO:0000387', 'GO:0045943']	12
Contig007794	['GO:0006936', 'GO:0007186', 'GO:0017156', 'GO:0000956', 'GO:0031115', 'GO:0051091', 'GO:0034332', 'GO:0017158', 'GO:0007420', 'GO:0005975', 'GO:0000398', 'GO:0000278', 'GO:0050909', 'GO:0048667', 'GO:0042742', 'GO:0002253', 'GO:0048666', 'GO:0006958', 'GO:0010812', 'GO:0006351', 'GO:0045944', 'GO:0065003', 'GO:0022008', 'GO:0007340', 'GO:0034333', 'GO:0009451', 'GO:0014059', 'GO:0019222', 'GO:00…	35
Contig008192	[]	0
Contig014352	['GO:0010467', 'GO:0017196']	1
Contig009739	['GO:0009893', 'GO:0006953', 'GO:0042509', 'GO:0050728', 'GO:0051384', 'GO:0045944', 'GO:0006954', 'GO:0072593']	4
Contig007649	['GO:0006357']	1
Contig013575	['GO:0042981', 'GO:0006915', 'GO:2000210', 'GO:2000811', 'GO:0010629', 'GO:0043066']	4
Contig012063	['GO:0046827', 'GO:0006397', 'GO:0033120', 'GO:0045292', 'GO:0008380', 'GO:0010628', 'GO:0071466', 'GO:0000398', 'GO:0010467', 'GO:0042307', 'GO:0032880']	6
Contig007796	[]	0
Contig014538	['GO:0007186', 'GO:0031175', 'GO:0016310', 'GO:0060441', 'GO:0060041', 'GO:0060445', 'GO:0008584', 'GO:0008045', 'GO:0051799', 'GO:0031290', 'GO:0045892', 'GO:0048916', 'GO:0048041', 'GO:0043588', 'GO:0042488', 'GO:0035556', 'GO:0099171', 'GO:0006412', 'GO:0043524', 'GO:0043065', 'GO:0007634', 'GO:0007265', 'GO:0036462', 'GO:0031069', 'GO:0043410', 'GO:0042593', 'GO:0030154', 'GO:2001235', 'GO:00…	45
Contig010516	['GO:0051446', 'GO:1902751', 'GO:0034644', 'GO:0051301', 'GO:0009314', 'GO:0007049', 'GO:0000082', 'GO:0110032', 'GO:0010971', 'GO:0110030', 'GO:0000086', 'GO:1904056', 'GO:0000079', 'GO:0006470', 'GO:0008283', 'GO:0051726', 'GO:0035335']	4
Contig012234	['GO:0007015', 'GO:0097237', 'GO:0061001', 'GO:0031175', 'GO:0050808', 'GO:0010976', 'GO:0060079', 'GO:0051489', 'GO:1904049', 'GO:0060999', 'GO:0098974', 'GO:0007399', 'GO:0035556', 'GO:0019722', 'GO:0030036', 'GO:0051823', 'GO:0050804', 'GO:0030154', 'GO:0051497', 'GO:1900272', 'GO:0051963', 'GO:0030182', 'GO:0030833', 'GO:1900454', 'GO:0045860']	11
Contig010068	['GO:0000266', 'GO:0007005', 'GO:0009060']	3
Contig008470	['GO:0097178', 'GO:0090630', 'GO:0001886', 'GO:0050790', 'GO:0043547']	1
Contig004498	['GO:0006086', 'GO:0006096', 'GO:0006734', 'GO:0006103', '', 'GO:0006099', 'GO:0006091', 'GO:0033512', 'GO:0019752', 'GO:0006104']	6
Contig001035	['GO:0015813', 'GO:0015711', 'GO:0001504', 'GO:0098656', 'GO:0015807', 'GO:0035725', 'GO:1902475', 'GO:0006835', 'GO:1902476', 'GO:0015800', 'GO:0015804', 'GO:0098810', 'GO:0060079', 'GO:0098655', 'GO:0055085']	7
Contig005255	['GO:0051260', 'GO:0006813', 'GO:0051259', 'GO:0071805', 'GO:1902259', 'GO:0006811', 'GO:0034765', 'GO:0055085']	7
Contig003555	['GO:0060326', 'GO:0006935', 'GO:0030335', 'GO:0016477', 'GO:0097746', 'GO:0006465', 'GO:0045932', 'GO:0006627', 'GO:1904754', 'GO:0035556', 'GO:0007264', 'GO:0050790', 'GO:1904694']	9
Contig002259	['GO:0002376', 'GO:0006954', 'GO:0019222', 'GO:0010628', 'GO:0050727', 'GO:0001819', 'GO:0002221', 'GO:1900542', 'GO:0035556', 'GO:0002720', 'GO:0070431', 'GO:0045087', 'GO:0030641']	7
Contig006463	['GO:0030389', 'GO:0016310', 'GO:0030855', 'GO:0036525', 'GO:0030393']	2
Contig011884	['GO:0016477', 'GO:0021702', 'GO:0021575', 'GO:0021933', 'GO:0007420', 'GO:0021941', 'GO:0030154', 'GO:0007628', 'GO:0021686', 'GO:0021549', 'GO:0030182']	4
Contig006574	['GO:0006364', 'GO:1901135', 'GO:0008152', 'GO:0042254', 'GO:0043487', 'GO:0005975', 'GO:0044038', 'GO:0006744', 'GO:0008152', 'GO:0000272', 'GO:0042908', 'GO:0030307', 'GO:0009273', 'GO:0009636', 'GO:0017000', 'GO:0055085', 'GO:0042255']	9
Contig014415	['GO:0051301', 'GO:0007049']	1
Contig001987	['GO:0018105', 'GO:0008152', 'GO:0016310', 'GO:0006468', 'GO:0045475', 'GO:0019722']	3
Contig004361	['GO:0030490', 'GO:0006629', 'GO:0006479', 'GO:0032501', 'GO:0016310', 'GO:0042274', 'GO:0006351', 'GO:0008406', 'GO:0007605', 'GO:0000462', 'GO:0055085', 'GO:0000272', '', 'GO:0046856', 'GO:0019222', 'GO:0008380', 'GO:0070922', 'GO:0016567', 'GO:0040034', 'GO:0006355', 'GO:0045732', 'GO:0090304', 'GO:0036170', 'GO:0036211', 'GO:0006357', 'GO:0006397', 'GO:0009267', 'GO:0043065', 'GO:0042981', 'G…	24
Contig002251	['GO:0022414', 'GO:0009615', 'GO:2000384', 'GO:0032502', 'GO:0006874', 'GO:0006816', 'GO:0042981', 'GO:0008152', 'GO:1902230', 'GO:0007283', 'GO:0051093', 'GO:0043066', 'GO:0043170', 'GO:0008283', 'GO:0019827']	11
Contig001881	['GO:0006479', '', 'GO:0032259', 'GO:0050727', 'GO:0018026', 'GO:0032088', 'GO:0048863', 'GO:0018022', 'GO:0043433', 'GO:0019827', 'GO:0030154']	2
Contig009820	[]	0
Contig006699	['GO:0005975', 'GO:0006094', 'GO:0050796', 'GO:0042593', 'GO:0051156']	5
Contig014715	['GO:0071260', 'GO:0032349', 'GO:0060390', 'GO:2000048', 'GO:0045944', 'GO:0051384', 'GO:2000860', 'GO:0031666', 'GO:0051216', 'GO:2000833', 'GO:0045669', 'GO:0060395', 'GO:0010039', 'GO:0032026', 'GO:0022408', 'GO:0048513', 'GO:0003323', 'GO:0060391', 'GO:0045595', '', 'GO:0010628', 'GO:0030509', 'GO:0071281', 'GO:0001654', 'GO:0050679', 'GO:2000872', 'GO:0006955', 'GO:0006879', 'GO:0045603', 'G…	19
Contig007180	['GO:0090660']	0
Contig003442	['GO:0051252', 'GO:0010628', 'GO:0051028', 'GO:0009653', 'GO:0006417', 'GO:0070934', 'GO:0017148', 'GO:0007399', 'GO:0001817', 'GO:0010468', 'GO:0006412', 'GO:0048255']	11
Contig003121	['GO:0009615', 'GO:0018105', 'GO:0048812', 'GO:0016310', 'GO:0007420', 'GO:0016197', 'GO:0006468', 'GO:0030900', 'GO:0034504', 'GO:0035556', 'GO:0007399', 'GO:0016043', 'GO:0048813', 'GO:0030154', 'GO:0021952', 'GO:0007417', 'GO:0007409', 'GO:1900181', 'GO:0001764', 'GO:0048675', 'GO:0030182']	10
Contig013203	['GO:0006397', 'GO:0008380', 'GO:0010467', 'GO:0006376', 'GO:0065003']	5
Contig005763	['GO:2000045', 'GO:0001946', 'GO:0006874', 'GO:0060674', 'GO:0007166', 'GO:0032965', 'GO:0048598', 'GO:0051298', 'GO:0021915', 'GO:0048729', 'GO:0072235', 'GO:0007219', 'GO:0007275', 'GO:1901698', 'GO:0035556', 'GO:2000134', 'GO:0019722', 'GO:0016055', 'GO:0051259', 'GO:0035502', 'GO:0035904', 'GO:0042994', 'GO:0045429', 'GO:0031587', 'GO:0051726', 'GO:0022414', 'GO:0009888', 'GO:0070121', 'GO:00…	34
Contig000536	['GO:0044320', 'GO:0043549', 'GO:0006351', 'GO:0036120', 'GO:0031100', 'GO:1990314', 'GO:0048146', 'GO:0006275', 'GO:0000086', 'GO:0050790', 'GO:0043170', 'GO:0032355', 'GO:0071407', 'GO:0071314', 'GO:0071392', 'GO:0007049', 'GO:0045893', 'GO:0090102', 'GO:0043687', 'GO:0000079', 'GO:0007265', 'GO:0033762', '', 'GO:0051726', 'GO:0044843', 'GO:0071732', 'GO:0051301', 'GO:0071373', 'GO:0071456', 'G…	10
Contig012265	['GO:0008285', '', 'GO:0006915', 'GO:0016567', '', 'GO:0060510', 'GO:0031398', 'GO:0006412', 'GO:0065003', 'GO:0030154']	6
Contig008319	['GO:0006355', 'GO:0006357', 'GO:0045893']	2
Contig004122	['GO:0000398', 'GO:0005975', '', 'GO:0060218', 'GO:0045944', 'GO:0001825', 'GO:0065003', 'GO:0014032', 'GO:0061515', 'GO:0008380', 'GO:0045945', 'GO:0000226', 'GO:0009952', 'GO:0006338', 'GO:0006397', 'GO:0000375', 'GO:0008152', 'GO:1903241', 'GO:0042981', 'GO:0010629', 'GO:0022618', 'GO:0000245', 'GO:0010467', 'GO:0060216', 'GO:0010468', 'GO:0030318', 'GO:0045943']	14
Contig007887	['GO:0031274', 'GO:0098609', 'GO:0030838', 'GO:0008360', 'GO:0007266']	4
Contig002835	['GO:0007186', 'GO:0009968', 'GO:0008277', 'GO:0007213', 'GO:0050790', 'GO:0043547', 'GO:0001975']	4
Contig005180	['GO:0030301', 'GO:0008104', 'GO:0015879', 'GO:1905477', 'GO:0044070', 'GO:0090314', 'GO:0032414', 'GO:1990961', 'GO:0072659', 'GO:0001701', 'GO:1904064', 'GO:0046907', 'GO:0006508']	7
Contig002032	['GO:0031133', 'GO:0031175', 'GO:0007420', 'GO:0010954', 'GO:0048666', 'GO:0051179', 'GO:0051649', 'GO:0007160', 'GO:0002023', 'GO:0002021', 'GO:0007413', 'GO:0021853', 'GO:0048168', 'GO:0098609', 'GO:0048677', 'GO:0000226', 'GO:0007399', 'GO:0007612', 'GO:0007155', 'GO:0031623', 'GO:0097090', 'GO:0045665', 'GO:0022010', 'GO:0007156', 'GO:0022604', 'GO:0060168', 'GO:0007628', 'GO:0071206', 'GO:00…	19
Contig007030	['GO:0030162', 'GO:0033554', 'GO:0006508', 'GO:0006511']	3
Contig000509	['GO:0051603', 'GO:0071346', 'GO:0051092', 'GO:0007519', 'GO:0006511', 'GO:0030163', 'GO:0010498', 'GO:0006508']	4
Contig014792	['GO:0007043', 'GO:0034332', 'GO:0007156', 'GO:0016339', 'GO:0098609', 'GO:0099560', 'GO:0007155', 'GO:0098742', 'GO:0000902']	4
Contig011622	['GO:0045892', 'GO:0006325', 'GO:0007283', 'GO:0006355', 'GO:0030154', 'GO:0048635']	5
Contig005885	['GO:0006355', 'GO:0051055', 'GO:0009887', 'GO:0045944']	2
Contig001437	['GO:0016567', 'GO:0045732', 'GO:0035556', 'GO:0019222']	3
Contig012544	['', '', 'GO:0032259', 'GO:0010468', 'GO:0006325', 'GO:0007420', '', 'GO:0045893', 'GO:0006355', 'GO:0030901', 'GO:0006351', 'GO:0007399', 'GO:0006357', 'GO:0006482', '']	7
Contig010284	['GO:0007586', 'GO:0048812', 'GO:0043408', 'GO:0000165', 'GO:0006468', 'GO:0030036', 'GO:0035821', 'GO:0035556', 'GO:0006508']	7
Contig006069	['GO:0006357', 'GO:0008284', 'GO:0045944']	3
Contig003259	['GO:0019348', 'GO:0006488', 'GO:0035268', 'GO:0005975', 'GO:0006487', 'GO:0008152', 'GO:1901615', 'GO:0097502', 'GO:0006066', 'GO:0019673', 'GO:0006661', 'GO:0061061', 'GO:0006139', 'GO:0006497', 'GO:0009247', 'GO:0044255', 'GO:0043170', 'GO:0006486', 'GO:0006506', 'GO:0035269', 'GO:0008152', 'GO:0000271']	11
Contig002146	['GO:0045892', 'GO:0007219', 'GO:0035019', 'GO:0000122', 'GO:0010468', 'GO:0030851', 'GO:0071425', 'GO:0033077', 'GO:0030097', 'GO:0046638']	6
Contig010485	['GO:0006357', 'GO:0006493', 'GO:0008333', 'GO:0008104', 'GO:0047496', 'GO:0048813', 'GO:0048311', 'GO:0048468', 'GO:0050772', 'GO:0098957', 'GO:0006605', 'GO:0022008', 'GO:0019896', 'GO:0007005']	6
Contig012101	['GO:0016310', 'GO:0046777', 'GO:0006468', 'GO:0043484', 'GO:0010468', 'GO:0018108']	3
Contig014983	['GO:0071108', 'GO:0006508']	1
Contig001242	['GO:0098703', 'GO:0007204', 'GO:0050806', 'GO:0006814', 'GO:0035725', 'GO:0072347', 'GO:0032224', 'GO:0070588', 'GO:0098655', 'GO:0034765', 'GO:0055085', 'GO:0035176', 'GO:0006816', 'GO:0042752', 'GO:0040017', 'GO:0060075', 'GO:0050975', 'GO:0006811', 'GO:0032230', 'GO:0048512', 'GO:0071805', 'GO:0032222', 'GO:0034220', 'GO:0008344', 'GO:0045475', 'GO:1902656']	9
Contig000684	['GO:0061077', 'GO:0044794', 'GO:0040018', 'GO:0030593', 'GO:0050821', 'GO:0000413', 'GO:0006457', 'GO:0044829', 'GO:0060348']	3
Contig006291	['GO:0038002', 'GO:0016601', 'GO:0007173', 'GO:0032228', 'GO:0009653', 'GO:0014009', 'GO:0060441', 'GO:0051000', 'GO:0043549', 'GO:0048873', 'GO:0019221', 'GO:0008283', 'GO:0060252', 'GO:0035914', 'GO:0043085', 'GO:0043406', 'GO:0035022', 'GO:0071902', 'GO:0051094', 'GO:0048009', 'GO:0035556', 'GO:0021897', 'GO:0048169', 'GO:0051092', 'GO:0016043', 'GO:0031647', 'GO:0007163', 'GO:0051146', 'GO:00…	16
Contig001259	['GO:0007507', 'GO:0043009', 'GO:0006397', 'GO:0008380', 'GO:0001654', 'GO:0043484', 'GO:0000381', 'GO:0007517', 'GO:0010468']	7
Contig013212	['GO:0006936', 'GO:0006814', 'GO:0035725', 'GO:1990573', 'GO:0086012', 'GO:0098719', 'GO:0071321', 'GO:0002027', 'GO:0034765', 'GO:0055085', 'GO:0008015', 'GO:0086091', 'GO:0086046', 'GO:0086015', 'GO:0006813', 'GO:0003163', 'GO:0006811', '', 'GO:0003254', 'GO:0098907', 'GO:0071805', 'GO:0055117', 'GO:0098909', 'GO:0034220', 'GO:2001257', 'GO:0071320', 'GO:0042391', 'GO:0006812']	10
Contig002671	['GO:0060078', 'GO:0034220', 'GO:1902476', 'GO:0006821', 'GO:0050877', 'GO:0060079', 'GO:0042391', 'GO:0006811', 'GO:0007268']	7
Contig008507	['GO:0008380', 'GO:0000398', 'GO:0010467', 'GO:0000381', 'GO:0010468']	5
Contig014356	['GO:0008589', 'GO:0071542', 'GO:0097306', 'GO:0030902', 'GO:2000543', 'GO:0045944', 'GO:0065003', 'GO:0010470', 'GO:0030900', 'GO:0009948', 'GO:0030901', 'GO:0006355', 'GO:0021549', 'GO:0030917', 'GO:0090009', 'GO:0045893', 'GO:0040036', 'GO:0040019', 'GO:0007411', 'GO:0003406', 'GO:0001702', 'GO:0060573', 'GO:0006357']	6
Contig014699	['GO:0022414', 'GO:0007130', 'GO:0070192', 'GO:0048599', 'GO:0045786', 'GO:0010628', 'GO:0007144', 'GO:0007283', 'GO:0051310', 'GO:0006302', 'GO:0007141', 'GO:0048255', 'GO:0051321', 'GO:0007286', 'GO:0051729']	9
Contig015957	['GO:2000059', 'GO:0061077', 'GO:0045766', 'GO:0010628', 'GO:0030036', 'GO:0019222', 'GO:0019222', 'GO:0006915', 'GO:1903645', 'GO:0050821', 'GO:0001525', 'GO:0006457', 'GO:0034605', 'GO:0050730', 'GO:0001938']	10
Contig007358	['GO:0034097', 'GO:0032674', 'GO:0002437', 'GO:0070665', 'GO:0019221', 'GO:0038043', '']	2
Contig011566	['GO:0045892']	1
Contig012834	['GO:0043123', 'GO:0002224', 'GO:0045576', 'GO:0071260', 'GO:0001819', 'GO:0009620', 'GO:0042327', 'GO:0043549', 'GO:0002253', 'GO:0009966', 'GO:0043066', 'GO:1900119', 'GO:0008219', 'GO:0001783', 'GO:0002906', 'GO:0009617', 'GO:0019222', 'GO:0032094', 'GO:0050776', 'GO:0051092', 'GO:0032765', 'GO:2001238', 'GO:0006355', 'GO:0045087', 'GO:0051259', 'GO:0006919', 'GO:0002376', 'GO:0051260', 'GO:00…	22
Contig001501	['GO:0006936', 'GO:0048545', 'GO:0010628', 'GO:0030240', 'GO:0048856', 'GO:0090131', 'GO:0010226', '', 'GO:0048741', 'GO:0043503', '', 'GO:0009612']	6
Contig009842	['GO:0043485', 'GO:0090383', 'GO:0046907', 'GO:0051453', 'GO:0032438', 'GO:0007264', 'GO:0006886', 'GO:1903232', 'GO:0060155', 'GO:0008104', 'GO:0016192', 'GO:1904377', 'GO:0072657', 'GO:0070925', 'GO:0043482', 'GO:0035646', 'GO:2001247', 'GO:0051641', 'GO:0048023', 'GO:0007005', 'GO:0015031']	8
Contig001666	['GO:0006364', 'GO:0000470', 'GO:0002181', 'GO:0042254', 'GO:0042273', 'GO:0010467', 'GO:0140242', 'GO:0006412', 'GO:0140236']	5
Contig000522	['GO:0022414', 'GO:0046902', 'GO:0030154', 'GO:0007283', 'GO:1990544', 'GO:0007141', 'GO:0043066', 'GO:1901029', 'GO:0055085', 'GO:0007005', 'GO:0140021']	7
Contig003186	['GO:0006355', 'GO:0006338', 'GO:0006351', 'GO:0045944']	4
Contig009565	['GO:0002181', 'GO:1990090', 'GO:0010467', 'GO:0140242', 'GO:0006412', 'GO:0140236']	1
Contig003706	['GO:0017196', 'GO:0045893', 'GO:0050821', 'GO:0010467', 'GO:0006474', 'GO:0043066']	3
Contig001315	['GO:0071286', 'GO:0070294', 'GO:1990573', 'GO:1900128', 'GO:0034220', 'GO:0001894', 'GO:0006813', 'GO:0010467', 'GO:0072359', 'GO:0071805', 'GO:0009791', 'GO:0043066', 'GO:0001822', 'GO:0006811', 'GO:0034765']	9
Contig012635	['GO:0098703', 'GO:0070509', 'GO:0007204', 'GO:0035725', 'GO:0060402', 'GO:0003008', 'GO:0086002', 'GO:0051899', 'GO:0070588', 'GO:0002027', 'GO:0086010', 'GO:0014824', 'GO:0034765', 'GO:0055085', 'GO:0086016', 'GO:0086091', 'GO:0086046', 'GO:0017157', 'GO:0086015', 'GO:0006816', 'GO:0086018', 'GO:0060371', 'GO:0003163', 'GO:0006811', 'GO:0007268', 'GO:0010045', 'GO:0001508', 'GO:0086045', 'GO:00…	8
Contig013184	['GO:0031175', 'GO:0008104', 'GO:0000266', 'GO:0008053', 'GO:0006605', 'GO:0006626', 'GO:0032526', 'GO:0007005', 'GO:0071305']	4
Contig008865	['GO:0006629', 'GO:0035187', 'GO:0046512', 'GO:0006670', 'GO:0030148', 'GO:0008610', 'GO:0046513', 'GO:0043066', 'GO:0044241', 'GO:1901615', 'GO:0006066', 'GO:0007586', 'GO:0006672', 'GO:0042759', 'GO:0006665', 'GO:0007268', 'GO:0009968', 'GO:0007346', 'GO:0006915', 'GO:0031629', '', 'GO:0051726', 'GO:0046514', 'GO:0016079', 'GO:0071345', 'GO:0045494', 'GO:2001234']	14
Contig006374	['GO:0034220', 'GO:0006811']	2
Contig010050	['GO:0019915', 'GO:0010890']	1
Contig003422	['GO:0016477', 'GO:0003016', 'GO:0060441', 'GO:0045647', 'GO:0002009', 'GO:0060749', 'GO:0060644', 'GO:0060764', 'GO:0045944', 'GO:0060638', 'GO:0060484', 'GO:0007389', 'GO:0060535', 'GO:0060480', 'GO:0048704', 'GO:0003002', 'GO:0060439', 'GO:0006355', 'GO:0030324', 'GO:0009952', 'GO:0043065', 'GO:0010628', 'GO:0060536', 'GO:0060435', 'GO:0030878', 'GO:0016525', 'GO:0060574', 'GO:0033599', 'GO:00…	12
Contig007130	['GO:0032456', 'GO:0006629', 'GO:0032465', 'GO:0006636', 'GO:0009062', 'GO:0061512', 'GO:0070164', 'GO:0006869', 'GO:0006631']	7
Contig005167	['GO:0014905', 'GO:0034389']	1
Contig002845	['GO:0032204', 'GO:0000724', 'GO:0006310', 'GO:0006974', 'GO:0016925', 'GO:0006281', 'GO:0006974']	5
Contig003012	['GO:0006364', 'GO:0006396', 'GO:0006479', 'GO:0042274', 'GO:0010467', 'GO:0000462']	5
Contig011939	['GO:0036269', 'GO:1902358', 'GO:0060117', 'GO:0019532', 'GO:0015701', 'GO:0001503', 'GO:0032474', 'GO:1902476', 'GO:0048884', 'GO:0007605', 'GO:0055085', 'GO:0006811', 'GO:1902358']	5
Contig002135	['GO:0051225', 'GO:0051301', 'GO:0007049', 'GO:0034087', 'GO:0007059', 'GO:0090307', 'GO:0051321', 'GO:0007062', 'GO:0019827']	5
Contig009765	['GO:0030218', 'GO:0061484', 'GO:0000278', 'GO:0033028', 'GO:0008283', 'GO:0071108', 'GO:0045892', 'GO:1900015', 'GO:0070050', 'GO:0036211', 'GO:0002574', 'GO:0070661', 'GO:0043249', 'GO:0036344', 'GO:0030223', 'GO:0043363', 'GO:0050727', 'GO:0001558', 'GO:0061519', 'GO:0031507', 'GO:0035520', 'GO:0016579', 'GO:0035726', 'GO:0001894', 'GO:0051726', '', 'GO:0008285', 'GO:0006325', 'GO:0030851', 'G…	10
Contig005490	['GO:0006357', 'GO:0048513', 'GO:0000122', 'GO:0009653', 'GO:0001708', 'GO:0009790', 'GO:0045893', 'GO:0045165', 'GO:0048704', 'GO:0048701', 'GO:0060429', 'GO:0006355']	6
Contig005340	['GO:0006397', 'GO:0001570', 'GO:0042552', 'GO:0008380', 'GO:0010628', 'GO:0035886', 'GO:0051028', 'GO:0019222', 'GO:0006417', 'GO:0048856', 'GO:0042759', 'GO:0010468', 'GO:0019222', 'GO:0048024', 'GO:0030154', 'GO:0007286', 'GO:0008366']	12
Contig006096	['GO:0016310', 'GO:0019216', 'GO:0008152', 'GO:0001525', 'GO:0001944', 'GO:0015939', 'GO:1904251', 'GO:0007399', 'GO:0019217', 'GO:0016043', 'GO:0007286', 'GO:0090207', 'GO:0015937', 'GO:0007005', 'GO:0022414', 'GO:0051881', 'GO:0007281', 'GO:0007283', 'GO:0009060']	14
Contig008486	['GO:0007186', 'GO:0009968', 'GO:0008277', 'GO:0035556', 'GO:0050790', 'GO:0043547']	4
Contig007561	['GO:0006397', 'GO:0008380', 'GO:0000245', 'GO:0000398', 'GO:0010467']	5
Contig005509	['GO:0006303', 'GO:1990166', 'GO:1990683']	1
Contig008682	[]	0
Contig012310	['GO:0006152', 'GO:0006281', 'GO:0006979', 'GO:0008584', 'GO:0046686', '', 'GO:0008152', 'GO:0042262']	4
Contig009390	['GO:1904093', 'GO:0034644', 'GO:0010507', 'GO:0009267', 'GO:0043065', 'GO:2001235', 'GO:0031334', 'GO:0090200', 'GO:0042981', 'GO:0006915', 'GO:0043276', 'GO:0071482', 'GO:2001234']	5
Contig013928	['GO:0001675', 'GO:0120211', 'GO:0016477', 'GO:0030317', 'GO:0007156', 'GO:0010996', 'GO:0007283', 'GO:0001764', 'GO:0022008', 'GO:0007155', 'GO:0019065']	6
Contig013059	['GO:0002376', 'GO:0002752', 'GO:1903028', 'GO:0050878', 'GO:0032502', 'GO:0001867', 'GO:0031638', 'GO:0048856', 'GO:0002253', 'GO:0050778', 'GO:0006956', 'GO:0006958', 'GO:0035821', 'GO:0045087', 'GO:0002250', 'GO:0006508']	9
Contig009790	['GO:0009432', 'GO:0016310', 'GO:0006281', 'GO:0006468', 'GO:0098655', 'GO:0055085', 'GO:0006974', 'GO:0006661', 'GO:0046656', 'GO:0046654', 'GO:0006813', 'GO:0006260', 'GO:0006497', 'GO:0009314', 'GO:0018108', 'GO:0000724', 'GO:0030587', 'GO:0009396', 'GO:0048544', 'GO:0032259', 'GO:0016192', 'GO:0035821', 'GO:0006302', 'GO:0042908', 'GO:0006506', 'GO:0006310']	14
Contig014601	['GO:0006493', 'GO:0006486']	2
Contig000593	['GO:0043123', 'GO:0042127', 'GO:0016477', 'GO:0001837', 'GO:0043542']	4
Contig007331	['GO:0051493', 'GO:0007015', 'GO:0030031', 'GO:0016601', 'GO:0030865', 'GO:1902622', 'GO:0035556', 'GO:0043652', 'GO:0007264', 'GO:0032956', 'GO:0008045', 'GO:0007163', 'GO:0008360']	6
Contig003656	['GO:0006414', 'GO:0002181', 'GO:0010467', 'GO:0140242', 'GO:0045727', 'GO:1904401', 'GO:0071320', 'GO:0006412', 'GO:0140236', 'GO:0002182']	2
Contig011044	['GO:0007186', 'GO:0002155', 'GO:0009966', 'GO:0007189']	3
Contig002803	['GO:0022414', 'GO:0009798', 'GO:0034587', 'GO:0009880', 'GO:0007315', 'GO:0071514', 'GO:0000578', 'GO:0031047', 'GO:0009948', 'GO:0030154', 'GO:0007283', 'GO:0007276', 'GO:0007281', 'GO:0051321', 'GO:0003002', 'GO:0010629', '', 'GO:0030719']	8
Contig015414	['GO:0016192', 'GO:0016197', 'GO:0032482', 'GO:0007265', 'GO:0035556', 'GO:0007264', 'GO:0051641', 'GO:0042147', 'GO:0015031']	8
Contig008337	['GO:0098703', 'GO:0006814', 'GO:0035725', 'GO:0051899', 'GO:0086002', 'GO:0086012', 'GO:0060372', 'GO:0086043', 'GO:0086047', 'GO:0030001', 'GO:0098655', 'GO:0002027', 'GO:0086010', 'GO:0034765', 'GO:0055085', 'GO:0086016', 'GO:0086091', 'GO:0086046', 'GO:0086015', 'GO:0086014', 'GO:0086048', 'GO:0086005', 'GO:0060371', 'GO:0086004', 'GO:0006811', 'GO:0086067', 'GO:0060307', 'GO:0001508', 'GO:00…	8
Contig005417	['GO:0006915', 'GO:0045494', 'GO:0010506', 'GO:0006914', 'GO:0007601']	5
Contig004394	['GO:1902600', 'GO:1902476', 'GO:0006821', 'GO:0006897', 'GO:0003014', 'GO:0006811', 'GO:0055085']	5
Contig002516	['GO:0007204', 'GO:0045892', 'GO:0055074', 'GO:0000122', 'GO:0060402', 'GO:0048167', 'GO:0055024', 'GO:0060314', 'GO:0060316']	4
Contig011506	[]	0
Contig007618	['GO:0051497', 'GO:0030837', 'GO:0051493']	1
Contig001102	['GO:0051782', 'GO:0010564', 'GO:1902807', 'GO:0045786']	1
Contig003002	['GO:0061172', 'GO:0000278', 'GO:0000132', 'GO:2000114', 'GO:0045475', 'GO:0050957', 'GO:0001662']	2
Contig004194	['GO:0010564', 'GO:0031145', 'GO:0051301', 'GO:0007049', 'GO:0000209', 'GO:0051726', 'GO:0007346', 'GO:0007091', 'GO:0043161', 'GO:0051445', 'GO:0000278', 'GO:0016567', 'GO:0070979', 'GO:0006511', 'GO:0044772', 'GO:0006508']	9
Contig008970	['GO:0006629', 'GO:0016139', 'GO:0008152', 'GO:0006027', 'GO:0005975', 'GO:0019377', 'GO:0006004']	3
Contig010644	['GO:0044255', 'GO:0010842', 'GO:0016310', 'GO:0030148', 'GO:0006665', 'GO:1902176', 'GO:0043066', 'GO:0042461', 'GO:2000425', 'GO:0046834']	5
Contig001284	['GO:0017196', 'GO:0010468', 'GO:0045893', 'GO:0010467', 'GO:0050821', 'GO:0006474', 'GO:0006355', 'GO:0043066', 'GO:0061055', 'GO:0030154', 'GO:0001525']	7
Contig010586	['GO:0019693', 'GO:0044249', 'GO:0006098', 'GO:0031100', 'GO:0016310', 'GO:0006015', 'GO:0006139', 'GO:0009165', 'GO:0009156', 'GO:0006164', '', 'GO:0006167']	8
Contig009504	['GO:0048812', 'GO:0016310', 'GO:0033364', 'GO:0006839', 'GO:0007399', 'GO:0030502', 'GO:0000226', 'GO:0033363', 'GO:0033371', 'GO:0031214', 'GO:0033382', 'GO:0033373', 'GO:0016192', 'GO:0006915', 'GO:0009987', 'GO:0001818', 'GO:0016485', 'GO:0050804', 'GO:0030154', 'GO:0140507', 'GO:0021952', 'GO:0007417', 'GO:0001701', 'GO:0099175', 'GO:0000022', 'GO:0030182', 'GO:1990535', 'GO:0000902']	12
Contig007840	['GO:0008104', 'GO:0003198', 'GO:0001649', 'GO:0006412', 'GO:0015031']	4
Contig000672	['GO:0006508']	1
Contig001544	['GO:0071364', 'GO:0006351', 'GO:0036120', 'GO:0008152', 'GO:1901836', 'GO:0006082', 'GO:0016070', 'GO:0006399', 'GO:0071363', 'GO:0006412', 'GO:0006418', 'GO:0009267', 'GO:0009987', 'GO:0045893', 'GO:0032869', 'GO:1901838', 'GO:0010467', 'GO:0006431', 'GO:0045943', 'GO:0009303']	9
Contig008805	['GO:0006888', 'GO:0016192', 'GO:0015031']	3
Contig004579	[]	0
Contig004163	[]	0
Contig000772	['GO:0031133', 'GO:0042552', 'GO:0006865', 'GO:0006874', 'GO:0005975', 'GO:0010961', 'GO:0048741', 'GO:0006954', 'GO:0045087', 'GO:0008361']	7
Contig015019	['GO:0006888', 'GO:0007030', 'GO:0006886', 'GO:0015031']	4
Contig000166	['GO:0060326', 'GO:0032730', 'GO:0006935', 'GO:0016477', 'GO:0001819', 'GO:0050729', 'GO:0050930', 'GO:0019221', 'GO:0032722', 'GO:0032735', 'GO:1902565', 'GO:0030595', 'GO:0010628', 'GO:0050727', 'GO:0006955', 'GO:0032755', 'GO:0051924']	9
Contig001540	['GO:0006479', 'GO:0048678', 'GO:0044237', 'GO:0008652', '', 'GO:0008152', 'GO:0042558', 'GO:0008152', 'GO:0044272', 'GO:1901698', 'GO:0009235', 'GO:0050667', 'GO:0031103', 'GO:0007399', '', 'GO:0046653', 'GO:0032259', 'GO:0009987', 'GO:0009611', 'GO:0030154', 'GO:0071732', 'GO:0009086', 'GO:0006555', 'GO:0071731', 'GO:0006520', 'GO:0008152', '', '', 'GO:0030182']	13
Contig005330	['GO:0042073', 'GO:0008104', 'GO:0060271', 'GO:0008340', 'GO:0048009', 'GO:0040024', 'GO:0006886', 'GO:0035720', 'GO:0046907']	4
Contig013678	['GO:0036211', 'GO:0009100', 'GO:0008152']	2
Contig006472	['GO:0099170', 'GO:0030902', 'GO:0021680', 'GO:0097352', 'GO:0006914', 'GO:0015031']	2
Contig004331	['GO:1904871', 'GO:0061077', '', 'GO:0050821', 'GO:1904851', 'GO:0006457', 'GO:1904874', 'GO:0032212', 'GO:0042026', 'GO:0007339']	3
Contig014924	['GO:0002062', 'GO:0061448', 'GO:0045597', 'GO:0016477', 'GO:0050867', 'GO:0051385', 'GO:0070374', 'GO:0046330', 'GO:0014070', 'GO:0007160', 'GO:0001525', 'GO:0071897', 'GO:0043009', 'GO:0031099', '', 'GO:0007275', 'GO:0009749', 'GO:0007229', 'GO:0008544', 'GO:0035988', 'GO:0051496', 'GO:0007492', 'GO:0035556', 'GO:0050793', 'GO:0007155', 'GO:0030324', 'GO:0032355', 'GO:0048513', 'GO:0070278', 'G…	24
Contig009008	['GO:0008643', 'GO:0015749', 'GO:0008645', 'GO:0005975', 'GO:1904659', 'GO:0009750', 'GO:0003044', 'GO:1990539', 'GO:0008015', 'GO:1901700', 'GO:0071332', 'GO:0055085', 'GO:0015755']	5
Contig008331	['GO:0034551', 'GO:0065003', 'GO:0007005']	2
Contig014622	[]	0
Contig004054	['GO:0000729', 'GO:0006281', 'GO:0000278', 'GO:0044818', 'GO:0008283', 'GO:0008152', 'GO:1904354', 'GO:0034205', 'GO:0046597', 'GO:0030174', 'GO:0031954', 'GO:0006974', 'GO:0042987', 'GO:0090656', 'GO:0050885', 'GO:0140448', 'GO:0045190', 'GO:0099171', 'GO:0035825', 'GO:0097193', 'GO:0048145', 'GO:0032206', 'GO:0000724', 'GO:0001832', 'GO:0000077', 'GO:0007049', 'GO:0031860', 'GO:0090737', 'GO:00…	21
Contig010057	['GO:0007507', 'GO:0048568', 'GO:0042659', 'GO:0007420', 'GO:0048856', 'GO:0014070', 'GO:0045892', '', 'GO:2000736', 'GO:0031667', '', 'GO:0032355', 'GO:0006338', '', 'GO:0045893', '', 'GO:0000122', 'GO:0009888', 'GO:0001701', 'GO:0006346']	8
Contig005168	['GO:0006396', 'GO:0007275', 'GO:0002763', 'GO:0032808', 'GO:0007166']	2
Contig010682	['GO:0030277', 'GO:0008344', 'GO:0007156', 'GO:0005975', 'GO:0019321', 'GO:0007155', 'GO:0007605']	4
Contig012581	['GO:0098869', 'GO:0016259', 'GO:0097237', 'GO:0045454', 'GO:0098754', 'GO:0007369', 'GO:0042537', 'GO:0006749', '', 'GO:0006979', '', 'GO:0042744', 'GO:0070995', 'GO:0001707', 'GO:0008283']	6
Contig011431	['GO:0016579', 'GO:0009740', 'GO:0071947', 'GO:0006511']	1
Contig002067	['GO:0009085', 'GO:0000160', 'GO:0035725', 'GO:0009306', 'GO:0016310', 'GO:0007059', 'GO:0000278', 'GO:0007420', 'GO:0008652', 'GO:0016202', 'GO:0051649', 'GO:0051654', 'GO:0007517', 'GO:0051382', 'GO:0019878', 'GO:0007094', 'GO:0009098', 'GO:0051179', 'GO:0098655', 'GO:0071897', 'GO:0055085', 'GO:0045892', 'GO:0072384', 'GO:0009410', 'GO:0007127', 'GO:0006399', 'GO:0006813', 'GO:0051094', 'GO:00…	34
Contig003699	['GO:0051466', 'GO:0043123', 'GO:0033209', 'GO:0051091', 'GO:0045672', 'GO:0045453', 'GO:0042327', 'GO:0046330', 'GO:0060749', 'GO:0019221', 'GO:0045944', 'GO:0033209', 'GO:0043406', 'GO:0055074', 'GO:0033598', 'GO:0036035', 'GO:1990830', 'GO:0002158', 'GO:1902533', 'GO:0060348', 'GO:0051092', 'GO:0019722', 'GO:0048535', 'GO:0045780', 'GO:0071812', 'GO:0044691', 'GO:0070371', 'GO:0009887', 'GO:00…	13
Contig004884	['GO:0060047', 'GO:0097623', 'GO:0086002', 'GO:1901379', 'GO:0002070', 'GO:0008584', 'GO:0086011', 'GO:0007605', 'GO:0034765', 'GO:1903817', 'GO:0086091', 'GO:0086013', 'GO:1901381', 'GO:0071482', 'GO:0006813', 'GO:0016567', 'GO:0086005', 'GO:0086003', 'GO:0033363', 'GO:0006811', 'GO:0071407', '', 'GO:0021750', '', 'GO:0086009', 'GO:0032259', 'GO:0060307', 'GO:0098915', 'GO:1903818', 'GO:1902260'…	8
Contig016065	['GO:0048856', 'GO:0002684', 'GO:2000359', 'GO:0098609', 'GO:0007399', 'GO:0007155', 'GO:0007339', 'GO:0030154']	5
Contig014672	['GO:0006629', 'GO:0007186', 'GO:0051592', 'GO:0006644', 'GO:0007340', 'GO:0001525', '', 'GO:0060716', 'GO:0035556', 'GO:0046488', 'GO:0016042', 'GO:0044255', 'GO:0042127', 'GO:0008104', 'GO:0043434', 'GO:0032962', 'GO:0007338', 'GO:0022414', 'GO:0010701', 'GO:0051480', 'GO:0048015', 'GO:0007200', 'GO:0051641', 'GO:0009056']	14
Contig001481	['GO:0045444', 'GO:0090304', 'GO:0030154', 'GO:0035357']	2
Contig007312	['GO:0034097', 'GO:0019221', 'GO:0016064', 'GO:0002638', 'GO:0043305']	1
Contig014822	['GO:0070131', 'GO:0010628', 'GO:0006417', 'GO:0045727', 'GO:0006412']	3
Contig003635	['GO:0006635', 'GO:0006629', 'GO:0030855', 'GO:0043279', 'GO:0046677', 'GO:0014070', 'GO:0009410', 'GO:0050796', 'GO:0001945', 'GO:0097421', 'GO:0010883', 'GO:0031667', 'GO:0031998', 'GO:0009437', 'GO:0010876', 'GO:0042755', 'GO:0046320', 'GO:0032000', 'GO:0001676', 'GO:0006006', 'GO:0071398', 'GO:0045471', 'GO:1904772', 'GO:0006641', 'GO:0006631']	8
Contig013029	[]	0
[truncated: 9,012 more rows]

## Sheet: dNdS
Contig	Omega
Contig000045	0.20244
Contig000050	2.40802
Contig000063	0.14387
Contig000064	0.0001
Contig000069	0.11924
Contig000074	9.59002
Contig000075	0.17368
Contig000077	0.35922
Contig000081	0.44657
Contig000084	0.56193
Contig000085	0.83206
Contig000087	0.19086
Contig000088	0.18694
Contig000096	0.2137
Contig000097	0.1253
Contig000098	0.09541
Contig000099	0.27152
Contig000100	0.0001
Contig000102	0.21482
Contig000103	0.0001
Contig000104	0.07287
Contig000105	0.17486
Contig000106	0.31842
Contig000107	0.17981
Contig000108	0.04843
Contig000109	0.05463
Contig000110	0.11206
Contig000111	0.17124
Contig000112	0.12473
Contig000113	0.26883
Contig000114	0.31709
Contig000115	0.01629
Contig000116	0.03511
Contig000117	0.10932
Contig000118	0.10417
Contig000119	1.21976
Contig000120	0.05464
Contig000121	0.05986
Contig000122	0.04788
Contig000123	0.0001
Contig000124	0.0964
Contig000125	0.46826
Contig000126	0.01648
Contig000127	0.3946
Contig000128	0.17656
Contig000129	0.1013
Contig000130	0.0001
Contig000131	0.2025
Contig000134	0.50399
Contig000136	0.13463
Contig000137	0.11712
Contig000139	0.0001
Contig000140	0.19605
Contig000141	0.05687
Contig000142	0.09902
Contig000143	0.15438
Contig000145	0.21471
Contig000147	0.15565
Contig000148	0.07815
Contig000149	0.28567
Contig000150	0.46573
Contig000151	0.05297
Contig000153	0.29987
Contig000154	0.0001
Contig000155	0.10986
Contig000156	0.0001
Contig000157	0.16728
Contig000158	0.01795
Contig000159	0.10318
Contig000160	0.13289
Contig000161	0.17507
Contig000162	0.09681
Contig000164	0.15527
Contig000166	0.38115
Contig000167	0.11528
Contig000168	0.32752
Contig000169	0.23415
Contig000170	0.0001
Contig000171	0.09836
Contig000174	0.06474
Contig000175	0.16952
Contig000177	0.00988
Contig000178	0.1384
Contig000179	0.20714
Contig000180	0.06939
Contig000181	0.899
Contig000182	0.04828
Contig000183	0.29548
Contig000184	0.08686
Contig000185	0.11036
Contig000186	0.10251
Contig000187	0.05228
Contig000188	0.28337
Contig000189	0.42572
Contig000190	0.01923
Contig000192	0.27098
Contig000193	0.02958
Contig000194	0.06311
Contig000195	0.0557
Contig000200	0.00754
Contig000203	0.08961
Contig000204	0.37333
Contig000205	0.05615
Contig000206	0.0748
Contig000207	0.33921
Contig000208	0.06811
Contig000209	0.01923
Contig000210	0.0001
Contig000212	0.00819
Contig000213	0.0001
Contig000214	0.20995
Contig000215	0.31522
Contig000217	0.0001
Contig000219	0.07438
Contig000220	0.09588
Contig000221	0.06019
Contig000222	0.16935
Contig000223	0.09135
Contig000225	1.07806
Contig000226	0.14855
Contig000228	0.14066
Contig000230	0.09519
Contig000231	0.02615
Contig000232	0.32835
Contig000233	0.03454
Contig000234	0.05297
Contig000235	0.89827
Contig000236	0.0001
Contig000237	0.0001
Contig000242	0.09989
Contig000244	0.92682
Contig000245	0.33138
Contig000246	0.0966
Contig000248	0.34672
Contig000250	0.0207
Contig000252	0.07144
Contig000253	0.0001
Contig000255	0.1137
Contig000261	0.0706
Contig000263	0.19241
Contig000265	0.18361
Contig000266	0.50039
Contig000267	0.07259
Contig000268	0.56785
Contig000269	0.09894
Contig000270	0.08155
Contig000271	0.07019
Contig000273	0.30526
Contig000274	0.24212
Contig000276	0.27517
Contig000277	0.25099
Contig000278	0.58172
Contig000279	1.46561
Contig000281	0.33055
Contig000282	0.04575
Contig000285	0.0001
Contig000286	0.11769
Contig000288	3.6921
Contig000289	0.1455
Contig000290	0.28192
Contig000291	0.09924
Contig000293	0.16286
Contig000295	0.0231
Contig000296	0.0001
Contig000297	0.08658
Contig000298	0.27531
Contig000299	0.19273
Contig000300	0.23995
Contig000301	0.19159
Contig000303	0.16339
Contig000304	0.41263
Contig000305	0.30397
Contig000306	0.16119
Contig000307	0.07792
Contig000341	0.03782
Contig000343	0.0001
Contig000344	0.0001
Contig000345	0.18787
Contig000346	0.03513
Contig000347	0.23123
Contig000348	0.31939
Contig000349	0.28976
Contig000350	0.31142
Contig000351	0.01833
Contig000352	0.75476
Contig000353	0.10012
Contig000354	0.11114
Contig000355	0.17592
Contig000356	0.31955
Contig000358	0.02883
Contig000359	0.12032
Contig000361	0.15234
Contig000362	0.09332
Contig000365	0.0001
Contig000366	0.13647
Contig000367	0.23218
Contig000368	0.08289
Contig000370	0.0001
Contig000372	0.07928
Contig000373	0.07219
Contig000376	0.27014
Contig000378	0.07454
Contig000380	0.0582
Contig000381	0.0001
Contig000382	0.10109
Contig000383	0.12108
Contig000385	0.16864
Contig000386	0.07089
Contig000387	0.0001
Contig000388	0.20831
Contig000390	0.0001
Contig000391	0.08768
Contig000392	0.08647
Contig000393	0.0001
Contig000394	0.10101
Contig000395	0.08316
Contig000396	0.10204
Contig000397	0.08826
Contig000399	0.01058
Contig000400	0.02124
Contig000401	0.0001
Contig000404	0.6732
Contig000405	0.14233
Contig000406	0.05869
Contig000407	0.08851
Contig000408	0.07054
Contig000409	0.0001
Contig000410	0.02958
Contig000411	0.3827
Contig000412	0.14107
Contig000413	0.02257
Contig000414	0.0001
Contig000415	0.04256
Contig000416	0.10318
Contig000417	0.06488
Contig000418	0.67519
Contig000419	0.28374
Contig000420	0.6208
Contig000421	0.91616
Contig000423	0.0001
Contig000424	0.07448
Contig000425	0.2425
Contig000426	0.24874
Contig000428	0.41181
Contig000429	0.0001
Contig000430	0.09583
Contig000431	0.43904
Contig000432	0.19676
Contig000433	0.44778
Contig000434	0.40315
Contig000435	0.0001
Contig000436	0.18057
Contig000439	0.06795
Contig000440	0.0001
Contig000441	0.14155
Contig000442	0.02824
Contig000443	0.09174
Contig000444	0.23428
Contig000445	0.15677
Contig000446	0.01556
Contig000447	0.08987
Contig000448	0.24555
Contig000452	0.0001
Contig000453	0.24283
Contig000454	0.01746
Contig000455	0.03587
Contig000457	0.0001
Contig000461	0.0001
Contig000462	0.05019
Contig000463	0.01783
Contig000466	0.0001
Contig000467	0.0001
Contig000470	0.39443
Contig000471	0.0832
Contig000472	0.0001
Contig000474	0.06002
Contig000475	0.0001
Contig000478	1.19452
Contig000480	0.91745
Contig000481	0.08034
Contig000483	0.15792
Contig000485	0.19697
Contig000486	0.02132
Contig000487	0.36621
Contig000488	0.01328
Contig000489	0.19943
Contig000490	0.08745
Contig000491	0.09124
Contig000492	0.09884
Contig000493	0.29353
Contig000495	0.0001
Contig000497	0.04973
Contig000500	0.5153
Contig000501	0.04992
Contig000502	0.0001
Contig000503	0.12414
Contig000504	0.60834
Contig000505	0.0001
Contig000506	0.04267
Contig000507	0.03823
Contig000508	0.41844
Contig000509	0.0001
Contig000510	0.06832
Contig000511	0.03016
Contig000515	0.20916
Contig000516	0.21354
Contig000517	0.16778
Contig000518	0.13086
Contig000519	0.0566
Contig000520	0.14643
Contig000521	0.04234
Contig000522	1.527
Contig000523	0.15803
Contig000524	0.08967
Contig000525	0.03317
Contig000526	0.24972
Contig000527	0.36915
Contig000528	0.0001
Contig000529	0.3379
Contig000530	0.0001
Contig000531	0.54569
Contig000532	0.24419
Contig000533	0.05987
Contig000534	0.02579
Contig000535	0.03791
Contig000536	0.02005
Contig000537	0.12426
Contig000538	0.35913
Contig000539	0.09253
Contig000542	0.07796
Contig000543	0.16793
Contig000544	0.0001
Contig000545	0.13066
Contig000546	0.09599
Contig000547	0.40201
Contig000548	1.48245
Contig000549	0.59651
Contig000550	0.44995
Contig000551	0.0001
Contig000552	0.06465
Contig000553	0.40557
Contig000554	0.31575
Contig000555	0.05183
Contig000557	0.21458
Contig000558	0.46287
Contig000559	0.19147
Contig000560	0.14879
Contig000561	0.15651
Contig000562	0.30858
Contig000563	0.19355
Contig000564	0.3236
Contig000565	0.1328
Contig000566	0.2018
Contig000568	0.0458
Contig000572	0.45083
Contig000573	0.17606
Contig000574	0.93436
Contig000576	0.07844
Contig000577	0.04561
Contig000578	0.08175
Contig000579	0.0001
Contig000581	0.05023
Contig000582	0.07732
Contig000584	0.0001
Contig000586	0.0001
Contig000587	0.24302
Contig000590	0.0001
Contig000593	0.0001
Contig000595	0.11869
Contig000600	0.0001
Contig000601	1.19155
Contig000604	0.09072
Contig000605	0.0001
Contig000606	0.15231
Contig000607	0.08176
Contig000608	0.30388
Contig000610	0.0001
Contig000611	0.05126
Contig000612	0.68527
Contig000613	0.15564
Contig000614	0.90346
Contig000615	0.01327
Contig000616	0.51669
Contig000617	0.48252
Contig000618	0.1315
Contig000619	999
Contig000622	0.0691
Contig000623	0.29198
Contig000624	0.45524
Contig000626	0.14232
Contig000627	0.1678
Contig000628	0.14055
Contig000630	999
Contig000631	0.33359
Contig000632	0.22797
Contig000633	0.0001
Contig000634	0.0001
Contig000635	0.16621
Contig000636	0.0001
Contig000637	0.06629
Contig000638	0.0001
Contig000639	0.0001
Contig000640	0.21089
Contig000641	0.0001
Contig000643	0.10599
Contig000644	0.21254
Contig000645	0.48103
Contig000646	1.12574
Contig000648	0.11442
Contig000649	0.04708
Contig000650	1.19297
Contig000651	0.04604
Contig000653	0.29537
Contig000654	0.06302
Contig000655	0.11224
Contig000658	0.08773
Contig000659	0.06599
Contig000661	0.02326
Contig000662	0.24823
Contig000663	0.0001
Contig000665	0.0848
Contig000669	0.01732
Contig000670	0.58748
Contig000671	0.36887
Contig000672	0.04367
Contig000673	0.0001
Contig000675	0.08845
Contig000676	0.183
Contig000677	0.13368
Contig000678	0.01302
Contig000679	0.08988
Contig000680	0.0001
Contig000681	0.03059
Contig000682	0.1879
Contig000683	0.0001
Contig000684	0.0001
Contig000686	0.0913
Contig000687	0.12147
Contig000688	0.16324
Contig000689	1.51936
Contig000690	0.0001
Contig000691	0.01515
Contig000697	0.12018
Contig000698	0.13498
Contig000699	0.0001
Contig000700	0.31362
Contig000702	0.01557
Contig000704	0.18036
Contig000705	0.0001
Contig000707	0.0001
Contig000710	0.26065
Contig000711	0.05517
Contig000712	0.66214
Contig000713	0.25591
Contig000714	0.0001
Contig000715	0.01358
Contig000716	0.13236
Contig000717	0.31304
Contig000718	0.35191
Contig000719	0.20397
Contig000720	0.23951
Contig000721	0.11107
Contig000722	0.23003
Contig000724	0.14294
Contig000725	0.21638
Contig000726	0.20727
Contig000729	0.27904
Contig000732	0.08846
Contig000734	0.22359
Contig000735	0.06113
Contig000736	0.0001
Contig000737	0.18203
Contig000738	0.20009
Contig000740	0.11662
Contig000741	0.12847
Contig000742	0.08022
Contig000745	999
Contig000746	0.35013
Contig000747	0.20814
Contig000748	0.15915
Contig000765	0.06736
Contig000766	0.08559
Contig000768	0.05624
Contig000770	0.0001
Contig000771	0.0489
Contig000772	0.01342
Contig000773	0.05794
Contig000774	0.05548
Contig000775	0.3858
Contig000776	0.0001
Contig000777	1.00413
Contig000780	0.09598
Contig000782	0.1393
Contig000783	0.06285
Contig000784	0.61962
Contig000786	0.03919
Contig000790	0.19542
Contig000791	0.0001
Contig000793	0.04789
Contig000794	0.08432
Contig000795	0.07117
Contig000796	0.18857
Contig000797	0.10279
Contig000798	0.19081
Contig000799	0.0236
Contig000800	0.10467
Contig000801	0.15653
Contig000802	0.0001
Contig000805	0.06646
Contig000806	0.01493
Contig000807	0.19174
Contig000808	1.97159
Contig000809	0.02675
Contig000811	0.0327
Contig000813	0.1131
Contig000814	0.0001
Contig000815	0.02366
Contig000816	0.45426
Contig000817	0.07013
Contig000818	0.20117
Contig000819	0.13395
Contig000820	0.04423
Contig000821	0.06698
Contig000822	0.60586
Contig000823	0.03293
Contig000824	0.04231
Contig000827	0.0001
Contig000828	0.70342
Contig000829	0.0001
Contig000830	0.73785
Contig000831	0.31926
Contig000832	0.04045
Contig000834	0.47113
Contig000835	0.0001
Contig000836	0.21618
Contig000837	0.04578
Contig000838	0.21828
Contig000839	0.11962
Contig000840	0.05479
Contig000841	0.14139
Contig000843	0.28749
Contig000844	0.0001
Contig000845	0.36125
Contig000846	0.27873
Contig000847	0.03439
Contig000850	0.12881
Contig000851	0.23385
Contig000852	0.30889
Contig000853	0.03885
Contig000855	0.0233
Contig000859	0.15943
Contig000860	0.16176
Contig000861	0.01776
Contig000862	0.0457
Contig000865	0.0001
Contig000866	0.5184
Contig000867	0.04909
Contig000868	0.08087
Contig000870	0.17296
Contig000871	0.44476
Contig000872	0.42566
Contig000873	0.26854
Contig000874	0.0267
Contig000875	0.05082
Contig000876	0.00619
Contig000877	0.3326
Contig000879	0.03738
Contig000880	0.0001
Contig000881	0.0001
Contig000882	0.14944
Contig000884	0.21186
Contig000885	0.42791
Contig000886	0.14142
Contig000887	0.24778
Contig000888	0.05652
Contig000890	0.05321
Contig000891	0.20374
Contig000893	0.18658
Contig000897	0.02898
Contig000898	1.52051
Contig000899	0.08259
Contig000900	0.37314
Contig000901	0.1773
Contig000902	0.08262
Contig000904	0.0001
Contig000905	0.0001
Contig000906	0.14352
Contig000907	0.07611
Contig000910	0.13071
Contig000911	0.2022
Contig000912	0.0001
Contig000913	0.05375
Contig000916	0.02138
Contig000917	0.57819
Contig000918	0.02517
Contig000919	0.32928
Contig000920	0.0464
Contig000922	0.03773
Contig000923	0.06952
Contig000924	0.06159
Contig000925	0.0001
Contig000926	0.01868
Contig000927	0.0578
Contig000928	0.25408
Contig000929	0.00849
Contig000930	0.0584
Contig000931	0.05454
Contig000932	0.00408
Contig000934	0.0001
Contig000937	0.05882
Contig000938	0.04552
Contig000940	0.10177
Contig000941	0.15601
Contig000942	0.2831
Contig000943	0.41641
Contig000944	0.15536
Contig000945	0.0001
Contig000946	0.18765
Contig000947	0.04652
Contig000950	0.14586
Contig000951	0.11265
Contig000952	0.15483
Contig000953	0.07599
Contig000954	0.05276
Contig000955	0.00468
Contig000956	0.0001
Contig000958	0.20273
Contig000959	0.27466
Contig000960	0.09182
Contig000961	1.10331
Contig000962	0.82182
Contig000963	0.25077
Contig000964	0.14316
Contig000965	0.15452
Contig000966	0.30169
Contig000967	0.41565
Contig000968	0.19766
Contig000969	0.46028
Contig000971	0.31836
Contig000972	0.0001
Contig000973	0.03346
Contig000976	0.03886
Contig000977	0.09452
Contig000978	0.08561
Contig000979	0.39068
Contig000980	0.05127
Contig000981	0.17061
Contig000982	0.25402
Contig000984	0.22139
Contig000985	0.02064
Contig000986	0.04536
Contig000987	0.0001
Contig000988	0.28473
Contig000989	0.288
Contig000990	0.61924
Contig000991	0.12821
Contig000992	0.21918
Contig000993	0.66709
Contig000994	0.0001
Contig000995	0.0001
Contig000996	0.30461
Contig000997	0.0001
Contig001001	0.03959
Contig001002	0.0001
Contig001004	0.24312
Contig001005	1.11712
Contig001006	0.21147
Contig001008	0.11415
Contig001009	0.0001
Contig001011	0.05144
Contig001012	0.04718
Contig001013	0.0001
Contig001014	0.10985
Contig001015	0.27336
Contig001016	0.04
Contig001017	0.07371
Contig001018	0.0001
Contig001021	0.0001
Contig001022	0.0001
Contig001023	0.26318
Contig001024	0.32719
Contig001025	0.29535
Contig001027	0.17162
Contig001028	0.09509
Contig001031	0.07803
Contig001032	0.16657
Contig001035	0.10774
Contig001036	0.24076
Contig001037	0.15846
Contig001039	0.11993
Contig001041	0.1179
Contig001042	0.24349
Contig001043	0.22452
Contig001044	0.11727
Contig001045	0.12944
Contig001047	0.12393
Contig001049	0.05287
Contig001050	3.50614
Contig001051	0.07604
Contig001052	0.25825
Contig001053	0.35894
Contig001054	0.0001
Contig001055	0.03067
Contig001056	0.98294
Contig001058	0.65511
Contig001059	0.1352
Contig001060	0.15237
Contig001062	0.06401
Contig001067	0.01328
Contig001068	0.02807
Contig001069	0.32025
Contig001070	0.79251
Contig001071	0.59004
Contig001072	0.06937
Contig001073	0.41195
Contig001074	0.83656
Contig001075	0.23465
Contig001076	0.31777
Contig001077	0.04019
Contig001078	0.24211
Contig001079	1.1458
Contig001080	0.18232
Contig001081	0.30401
Contig001082	0.89796
Contig001083	1.2397
Contig001084	0.55529
Contig001086	0.0001
Contig001087	0.03093
Contig001088	0.27114
Contig001089	0.22437
Contig001090	4.7111
Contig001091	0.15629
Contig001092	0.03284
Contig001093	0.38531
Contig001094	0.07522
Contig001095	0.33248
Contig001096	0.89735
Contig001098	0.11145
Contig001099	0.01182
Contig001101	0.13959
Contig001102	0.44706
Contig001104	0.33471
Contig001105	0.04853
Contig001106	0.15938
Contig001107	0.22566
Contig001108	0.0001
Contig001109	0.0001
Contig001110	0.04754
Contig001111	0.08305
Contig001112	0.27603
Contig001113	0.0053
Contig001114	0.2036
Contig001117	0.45034
Contig001118	0.1079
Contig001119	0.17403
Contig001120	0.01515
Contig001195	0.0384
Contig001196	0.0462
Contig001197	0.0001
Contig001202	0.116
Contig001203	0.09547
Contig001204	0.03676
Contig001206	0.26591
Contig001210	0.1386
Contig001211	0.36813
Contig001213	0.42374
Contig001214	0.13368
Contig001215	0.05959
Contig001216	0.01944
Contig001217	0.71877
Contig001218	0.24323
Contig001219	0.09956
Contig001220	0.24236
Contig001221	0.34417
Contig001224	0.34702
Contig001225	0.19197
Contig001226	0.45127
Contig001227	0.07416
Contig001228	0.19044
Contig001229	0.31947
Contig001231	0.11519
Contig001232	0.25312
Contig001233	0.31222
Contig001234	0.14547
Contig001235	0.01559
Contig001236	0.12767
Contig001237	0.48163
Contig001238	0.0433
Contig001239	0.0001
Contig001241	0.07233
Contig001242	0.00533
Contig001243	1.85636
Contig001244	0.08088
Contig001245	0.10132
Contig001246	0.15246
Contig001248	0.12902
Contig001250	0.05466
Contig001251	0.10129
Contig001252	0.08933
Contig001253	0.1593
Contig001255	0.4134
Contig001256	0.11438
Contig001257	0.07039
Contig001259	0.07639
Contig001261	0.09681
Contig001262	0.03277
Contig001263	0.31209
Contig001266	0.08283
Contig001267	0.14093
Contig001268	0.15273
Contig001269	0.38079
Contig001270	0.21256
Contig001271	0.04561
Contig001272	0.36614
Contig001278	0.01972
Contig001280	0.067
Contig001281	0.08718
Contig001282	0.06627
Contig001284	0.03404
Contig001285	0.5757
Contig001286	0.0001
Contig001287	0.0834
Contig001288	0.20409
Contig001289	0.24902
Contig001290	0.31066
Contig001291	0.57548
Contig001292	0.27294
Contig001293	0.03807
Contig001296	0.0001
Contig001297	0.57926
Contig001298	0.15169
Contig001300	0.05318
Contig001301	0.02543
Contig001305	0.0001
Contig001306	0.21021
Contig001307	0.07135
Contig001308	0.02784
Contig001309	0.19949
Contig001311	0.11017
Contig001312	0.25287
Contig001313	0.18919
Contig001314	0.04001
Contig001315	0.0001
Contig001316	0.13095
Contig001317	0.03485
Contig001319	0.48702
Contig001321	0.50979
Contig001323	0.02507
Contig001324	0.05476
Contig001326	0.00464
Contig001328	0.41185
Contig001331	0.21117
Contig001332	0.14199
Contig001336	0.0001
Contig001339	0.75924
Contig001340	0.06209
Contig001342	0.15643
Contig001344	0.09475
Contig001345	0.03196
Contig001346	0.37886
Contig001347	0.09812
Contig001348	0.0001
Contig001349	0.135
Contig001350	1.03556
Contig001351	0.0001
Contig001352	0.0001
Contig001353	0.84031
Contig001354	0.02547
Contig001355	0.2063
Contig001356	0.0001
Contig001357	0.01505
Contig001358	0.0001
Contig001359	0.03105
Contig001361	0.10588
Contig001363	0.0887
Contig001364	0.08012
Contig001367	0.92159
Contig001368	0.03095
Contig001369	0.19971
Contig001370	0.16187
Contig001372	0.19756
Contig001379	0.0898
Contig001383	0.0001
Contig001384	0.0001
Contig001385	0.17238
Contig001386	0.08345
Contig001387	0.49315
Contig001388	0.5594
Contig001392	0.0001
Contig001397	0.18162
Contig001398	0.56229
Contig001399	0.17484
Contig001401	0.05627
Contig001403	0.0937
Contig001404	0.01973
Contig001405	0.10733
Contig001406	0.07828
Contig001407	0.08776
Contig001408	0.08019
Contig001409	0.23425
Contig001410	0.16753
Contig001411	0.58758
Contig001412	0.17238
Contig001413	0.4213
Contig001414	0.10389
Contig001415	0.30321
Contig001416	0.0001
Contig001417	0.1819
Contig001418	0.09659
Contig001419	0.15971
Contig001420	0.15542
Contig001421	0.03444
Contig001422	0.17997
Contig001424	0.0001
Contig001425	0.59812
Contig001427	0.05286
Contig001430	0.12984
Contig001433	0.0001
Contig001434	0.07821
Contig001435	0.23094
Contig001436	0.12486
Contig001437	0.11906
Contig001438	0.24816
Contig001439	0.09201
Contig001440	0.35218
Contig001441	0.13757
Contig001444	0.0001
Contig001445	0.18133
Contig001447	0.04488
Contig001448	0.59802
Contig001449	0.24902
Contig001450	0.0001
Contig001451	0.34796
Contig001452	0.33564
Contig001453	0.34718
Contig001454	0.18689
Contig001455	0.10957
Contig001456	0.29186
Contig001457	0.66236
Contig001458	0.15414
Contig001460	0.25006
Contig001465	0.07786
Contig001466	0.26846
Contig001467	0.13384
Contig001468	0.29127
Contig001469	0.31346
Contig001471	0.03769
Contig001472	0.02473
Contig001473	0.20382
Contig001474	0.07968
Contig001475	0.04786
Contig001476	0.07343
Contig001477	0.37545
Contig001479	0.03988
Contig001481	0.51405
Contig001482	0.07389
Contig001483	0.0001
Contig001484	0.37883
Contig001485	0.10078
Contig001486	0.12578
Contig001487	0.05868
Contig001488	0.2997
Contig001489	0.06535
Contig001490	0.97986
Contig001491	0.30576
Contig001492	0.4914
Contig001493	0.12687
Contig001494	0.0525
Contig001495	0.03386
Contig001496	0.46829
Contig001497	0.01595
Contig001498	0.13139
Contig001499	0.35645
Contig001500	1.4071
Contig001501	0.0001
Contig001502	0.33559
Contig001505	0.0001
Contig001507	0.37612
Contig001508	1.17958
Contig001510	0.17694
Contig001511	0.41233
Contig001512	0.05925
Contig001515	0.11757
Contig001516	0.1759
Contig001517	0.19238
Contig001518	1.30133
Contig001520	0.07465
Contig001522	0.23054
Contig001524	0.0001
Contig001525	0.39139
Contig001526	0.11543
Contig001527	0.07811
Contig001528	0.1217
Contig001529	0.12782
Contig001530	0.0001
Contig001531	0.23605
Contig001533	0.1918
Contig001534	0.08948
Contig001535	0.04046
Contig001536	0.22639
Contig001538	0.21114
Contig001539	0.01026
Contig001540	0.14245
Contig001541	0.0001
Contig001543	0.19261
Contig001544	0.12416
Contig001545	0.18105
Contig001547	0.06226
Contig001548	0.08321
Contig001549	0.14311
Contig001551	0.2141
Contig001552	0.1089
Contig001553	0.24221
Contig001554	0.23291
Contig001557	0.87962
Contig001558	0.48938
Contig001561	0.41596
Contig001563	2.79336
Contig001564	0.0001
Contig001566	0.06989
Contig001567	0.57555
Contig001571	0.0001
Contig001572	0.07153
Contig001577	0.17957
Contig001578	0.07646
Contig001579	0.20774
Contig001582	0.22078
Contig001583	0.05193
Contig001584	0.67794
Contig001585	0.30727
Contig001586	0.48887
Contig001587	0.14649
Contig001588	0.10864
Contig001589	0.17922
Contig001590	0.02619
Contig001591	0.20023
Contig001592	0.0001
Contig001593	0.24167
Contig001594	0.33093
Contig001595	0.04075
Contig001596	0.09894
Contig001597	0.13914
Contig001598	0.14853
Contig001599	0.05458
Contig001600	0.59719
Contig001601	0.15677
Contig001602	0.27104
Contig001603	0.0772
Contig001604	0.06783
Contig001605	0.09563
Contig001606	0.0001
Contig001607	0.07261
Contig001608	0.11677
Contig001610	0.01807
Contig001611	0.11236
Contig001612	0.01396
Contig001613	0.23924
Contig001616	0.02411
Contig001618	0.04623
Contig001619	0.0687
Contig001620	0.12317
Contig001622	0.19453
Contig001624	0.08673
Contig001625	0.07274
Contig001628	0.07868
Contig001632	0.05284
Contig001633	0.28042
Contig001635	0.03514
Contig001636	0.04412
Contig001637	0.07498
Contig001638	0.16986
Contig001641	0.09221
Contig001642	0.0001
Contig001644	0.04001
Contig001645	0.54877
Contig001646	0.57789
Contig001647	0.5391
Contig001649	0.3762
Contig001650	0.06408
Contig001651	0.15277
Contig001652	0.46944
Contig001653	0.78822
Contig001654	0.10598
Contig001655	0.30405
Contig001656	0.63315
Contig001659	0.05077
Contig001660	0.20451
Contig001661	0.89976
Contig001663	0.80593
Contig001664	0.36075
Contig001666	0.08001
Contig001667	0.151
Contig001668	0.1749
Contig001669	0.0001
Contig001671	0.50387
Contig001672	0.42434
Contig001673	0.39107
Contig001674	0.42435
Contig001675	0.03005
Contig001676	0.25658
Contig001677	0.02079
Contig001680	0.04249
Contig001682	0.01568
Contig001683	1.7055
Contig001687	0.17458
Contig001689	0.17927
Contig001690	0.02584
Contig001692	0.06818
Contig001693	0.10056
Contig001694	0.3565
Contig001695	0.14212
Contig001696	0.23209
Contig001697	0.18954
Contig001698	0.07897
Contig001700	0.04485
Contig001702	0.18794
Contig001703	0.27806
Contig001704	0.0883
Contig001706	0.096
Contig001707	0.10419
Contig001708	0.30136
Contig001709	0.0001
Contig001710	0.26145
Contig001711	0.27537
Contig001712	0.13664
Contig001713	0.09415
Contig001714	0.06964
Contig001715	0.14326
Contig001716	0.06626
Contig001717	0.07433
Contig001719	0.05135
Contig001722	0.32069
Contig001723	0.12596
Contig001724	0.22313
Contig001725	0.17561
Contig001726	0.08476
Contig001727	0.05156
Contig001728	0.10021
Contig001730	0.13312
Contig001731	0.0795
Contig001732	0.28893
Contig001733	0.0001
Contig001734	0.02278
Contig001735	0.112
Contig001736	0.11963
Contig001737	0.0001
Contig001739	0.27625
Contig001740	0.18942
Contig001741	0.2148
Contig001742	0.36523
Contig001743	0.0849
Contig001744	0.30657
Contig001746	0.15807
Contig001747	0.0001
Contig001748	0.08394
Contig001749	0.0313
Contig001750	0.0001
Contig001751	0.20004
Contig001752	0.03542
Contig001754	0.23365
Contig001755	0.01885
Contig001756	0.03486
Contig001757	0.09781
Contig001758	0.10994
Contig001759	0.36372
Contig001761	0.37105
Contig001762	0.16771
Contig001763	0.0001
Contig001765	0.0001
Contig001766	0.06213
Contig001767	0.07267
Contig001769	0.04191
Contig001772	0.12839
Contig001773	0.04781
Contig001774	0.22267
Contig001775	0.0001
Contig001776	0.0001
Contig001778	0.24815
Contig001779	0.4313
Contig001780	0.76296
Contig001781	0.19948
Contig001782	0.0001
Contig001783	0.11728
Contig001784	0.0001
Contig001785	0.58331
Contig001786	0.01821
Contig001787	0.3326
Contig001788	0.1697
Contig001789	0.10088
Contig001790	0.01873
Contig001792	0.30509
Contig001795	0.46079
Contig001796	0.03993
Contig001797	0.22128
Contig001798	0.0001
Contig001799	0.10926
Contig001800	0.06108
Contig001801	0.03747
Contig001802	0.1127
Contig001804	0.20269
Contig001805	0.03708
Contig001806	0.12731
Contig001810	0.07
Contig001811	0.33642
Contig001812	0.03266
Contig001813	999
Contig001814	0.0001
Contig001815	0.03239
Contig001816	0.11092
Contig001817	0.0001
Contig001818	9.5469
Contig001819	0.86465
Contig001821	0.09523
Contig001822	0.28317
Contig001823	0.55299
Contig001824	0.27473
Contig001825	0.24999
Contig001829	0.04539
Contig001830	0.36111
Contig001831	0.55494
Contig001832	0.01644
Contig001835	0.42599
Contig001836	0.34376
Contig001837	0.42176
Contig001838	0.03756
Contig001839	0.0001
Contig001840	0.05585
Contig001841	0.03279
Contig001843	0.45531
Contig001844	1.16147
Contig001845	0.0943
Contig001846	0.65833
Contig001848	0.15241
Contig001849	0.0001
Contig001850	0.12495
Contig001851	0.06724
Contig001855	0.14166
Contig001857	0.14992
Contig001859	0.01649
Contig001861	0.22059
Contig001863	0.0001
Contig001865	0.37074
Contig001868	0.08873
Contig001871	0.57674
Contig001874	0.13592
Contig001875	0.53784
Contig001876	0.04105
Contig001879	0.0001
Contig001881	0.10069
Contig001882	0.01439
Contig001884	0.09417
Contig001886	0.28407
Contig001887	0.37513
Contig001888	0.28765
Contig001890	0.04867
Contig001893	0.0001
Contig001894	0.04153
Contig001897	0.1425
Contig001898	0.02804
Contig001899	0.15109
Contig001900	0.31229
Contig001902	0.05464
Contig001904	0.0001
Contig001905	0.0001
Contig001906	0.0001
Contig001907	0.26017
Contig001908	0.129
Contig001909	0.20487
Contig001910	0.39209
Contig001911	0.14108
Contig001912	0.37348
Contig001913	0.04371
Contig001914	0.17601
Contig001915	0.16308
Contig001916	0.07364
Contig001917	0.0001
Contig001918	0.79622
Contig001919	0.87438
Contig001920	0.30999
Contig001921	0.06521
Contig001922	0.27923
Contig001923	0.18125
Contig001925	1.20794
Contig001926	0.05755
Contig001927	0.09105
Contig001928	0.03268
Contig001929	0.04932
Contig001931	0.02849
Contig001934	0.41258
Contig001936	0.39223
Contig001937	0.16757
Contig001938	0.35528
Contig001940	0.32599
Contig001941	0.0001
Contig001943	0.5831
Contig001944	0.13309
Contig001945	0.06273
Contig001946	0.08561
Contig001947	0.02788
Contig001948	0.02955
Contig001950	0.08548
Contig001951	1.18669
Contig001952	0.40414
Contig001953	0.0001
Contig001954	0.07284
Contig001955	0.08391
Contig001956	0.14155
Contig001957	0.01662
Contig001958	0.0001
Contig001959	0.08033
Contig001962	0.0001
Contig001963	0.04266
Contig001964	0.01517
Contig001965	0.25654
Contig001966	0.0001
Contig001967	0.08824
Contig001968	0.12137
Contig001969	0.73927
Contig001970	999
Contig001971	0.0001
Contig001972	0.56931
Contig001973	1.01677
Contig001974	0.49903
Contig001975	0.0001
Contig001978	1.16853
Contig001979	0.28029
Contig001980	0.77587
Contig001981	0.01524
Contig001982	0.45511
Contig001983	0.25849
Contig001985	0.58538
Contig001987	0.03259
Contig001988	0.04442
Contig001990	0.0001
Contig001991	0.74336
Contig001992	0.58278
Contig001993	0.71448
Contig001994	999
Contig001997	0.27246
Contig001998	0.27947
Contig002001	0.07387
Contig002002	0.0456
Contig002003	0.43022
Contig002004	0.28986
Contig002005	0.28951
Contig002006	0.0001
Contig002007	0.05279
Contig002008	0.29973
Contig002009	0.12032
Contig002011	0.00811
Contig002012	0.23123
Contig002013	0.10385
Contig002014	0.21342
Contig002015	0.0001
Contig002016	0.63993
Contig002017	0.38665
Contig002018	0.03331
Contig002019	0.09247
Contig002020	0.0001
Contig002021	0.09633
Contig002023	0.14038
Contig002024	0.04234
Contig002029	0.02962
Contig002031	0.5151
Contig002032	0.03285
Contig002033	0.03727
Contig002034	0.0505
Contig002036	0.32457
Contig002037	0.04492
Contig002038	0.37446
Contig002040	0.10711
Contig002041	0.05424
Contig002042	0.04391
Contig002045	0.31766
Contig002047	0.02465
Contig002048	0.10843
Contig002053	0.0001
Contig002054	0.24171
Contig002057	0.06022
Contig002058	0.13083
Contig002061	0.27226
Contig002062	0.25363
Contig002063	0.05203
Contig002066	0.35312
Contig002067	0.83891
Contig002068	0.05285
Contig002069	0.35483
Contig002070	0.14791
Contig002071	0.48593
Contig002072	0.31354
Contig002074	0.04428
Contig002075	0.0667
Contig002076	0.35168
Contig002077	0.81138
Contig002078	0.47738
Contig002080	1.33524
Contig002081	0.0001
Contig002082	0.0001
Contig002085	0.0001
Contig002087	0.22572
Contig002089	0.10438
Contig002091	0.0001
Contig002092	0.27198
Contig002093	0.10004
Contig002094	0.0372
Contig002096	0.36978
Contig002097	0.13226
Contig002098	0.16313
Contig002101	0.0001
Contig002103	0.0248
Contig002106	0.07985
Contig002107	0.51789
Contig002109	0.05322
Contig002110	0.12619
Contig002111	0.03549
Contig002112	0.0001
Contig002113	0.08694
Contig002114	0.21567
Contig002115	0.16753
Contig002116	0.16193
Contig002117	0.03397
Contig002118	0.09224
Contig002119	0.0001
Contig002121	0.15245
Contig002122	0.30428
Contig002123	0.05524
Contig002124	0.04923
Contig002125	0.49477
Contig002126	0.07569
Contig002127	0.0001
Contig002130	0.08357
Contig002133	0.04164
Contig002134	0.24056
Contig002135	0.00774
Contig002137	0.03855
Contig002139	0.13112
Contig002140	0.05338
Contig002141	0.01348
Contig002142	0.1654
Contig002143	0.05539
Contig002144	0.04601
Contig002145	0.13203
Contig002146	0.14303
Contig002147	0.2818
Contig002148	0.03912
Contig002149	0.13657
Contig002150	0.43316
Contig002155	0.59313
Contig002156	0.83672
Contig002158	0.13546
Contig002159	0.02641
Contig002160	0.02225
Contig002161	0.13703
Contig002163	0.17048
Contig002164	0.60132
Contig002165	0.0734
Contig002166	0.255
Contig002167	0.0001
Contig002168	0.11387
Contig002169	0.0001
Contig002170	0.0001
Contig002171	0.01372
Contig002172	0.16042
Contig002173	0.17543
Contig002174	0.17794
Contig002175	0.10162
Contig002176	0.08519
Contig002177	0.12295
Contig002178	0.13604
Contig002181	0.07285
[truncated: 9,541 more rows]

## Sheet:  Pairwise dNdS
Index	Afo_Ecc	Afo_Ech	Afo_Emi	Afo_Emo	Afo_Epa	Afo_Esc	Afo_Pad	Afo_Pan	Afo_Ppe	Afo_Ppk	Afo_Ppp	Afo_Ppt	Afo_Sde	Afo_Shu	Afo_Sma	Afo_Sme	Apa_Afo	Apa_Ecc	Apa_Ech	Apa_Emi	Apa_Emo	Apa_Epa	Apa_Esc	Apa_Pad	Apa_Pan	Apa_Ppe	Apa_Ppk	Apa_Ppp	Apa_Ppt	Apa_Sde	Apa_Shu	Apa_Sma	Apa_Sme	Ecc_Emi	Ecc_Emo	Ecc_Epa	Ecc_Esc	Ecc_Pad	Ecc_Pan	Ecc_Ppe	Ecc_Ppk	Ecc_Ppp	Ecc_Ppt	Ecc_Sde	Ecc_Shu	Ecc_Sma	Ecc_Sme	Ech_Ecc	Ech_Emi
[truncated: 11,011 more rows]
[truncated: 104 more columns]

[truncated: 4 more sheets: Branch dNdS, Phylostrata, Phylostrata Dating, ODP Sites]
